# Supplementary material for: Engineered calprotectin-sensing probiotics for IBD surveillance in humans
Source: PubMed Central journal article supplement (PMC10410751; doi:10.1073/pnas.2221121120), 2023-07-31
Supplement: pnas.2221121120.sapp.pdf [file pnas.2221121120.sapp.pdf]

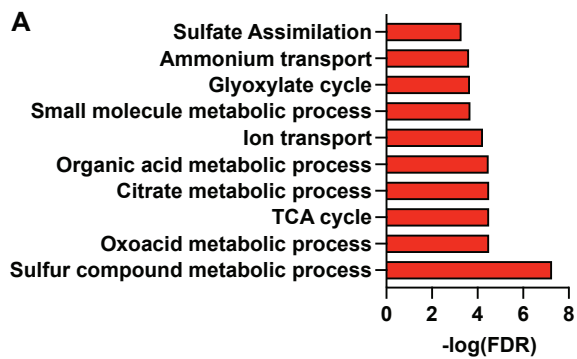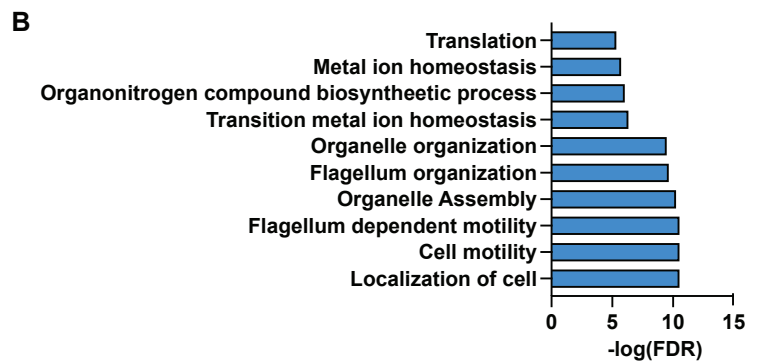

**Supplemental Fig. 1. Gene ontology (GO) analysis indicated enrichment of EcN genes in pathways involved in ion transport, cellular metabolic processes, and cell motility after calprotectin treatment.**

**(A)** Gene ontology analysis of statistically significant upregulated EcN genes with at least 2 times fold change after calprotectin treatment compared to controls. **(B)** Gene ontology analysis of statistically significant downregulated EcN genes with at least 2 times fold change after calprotectin treatment

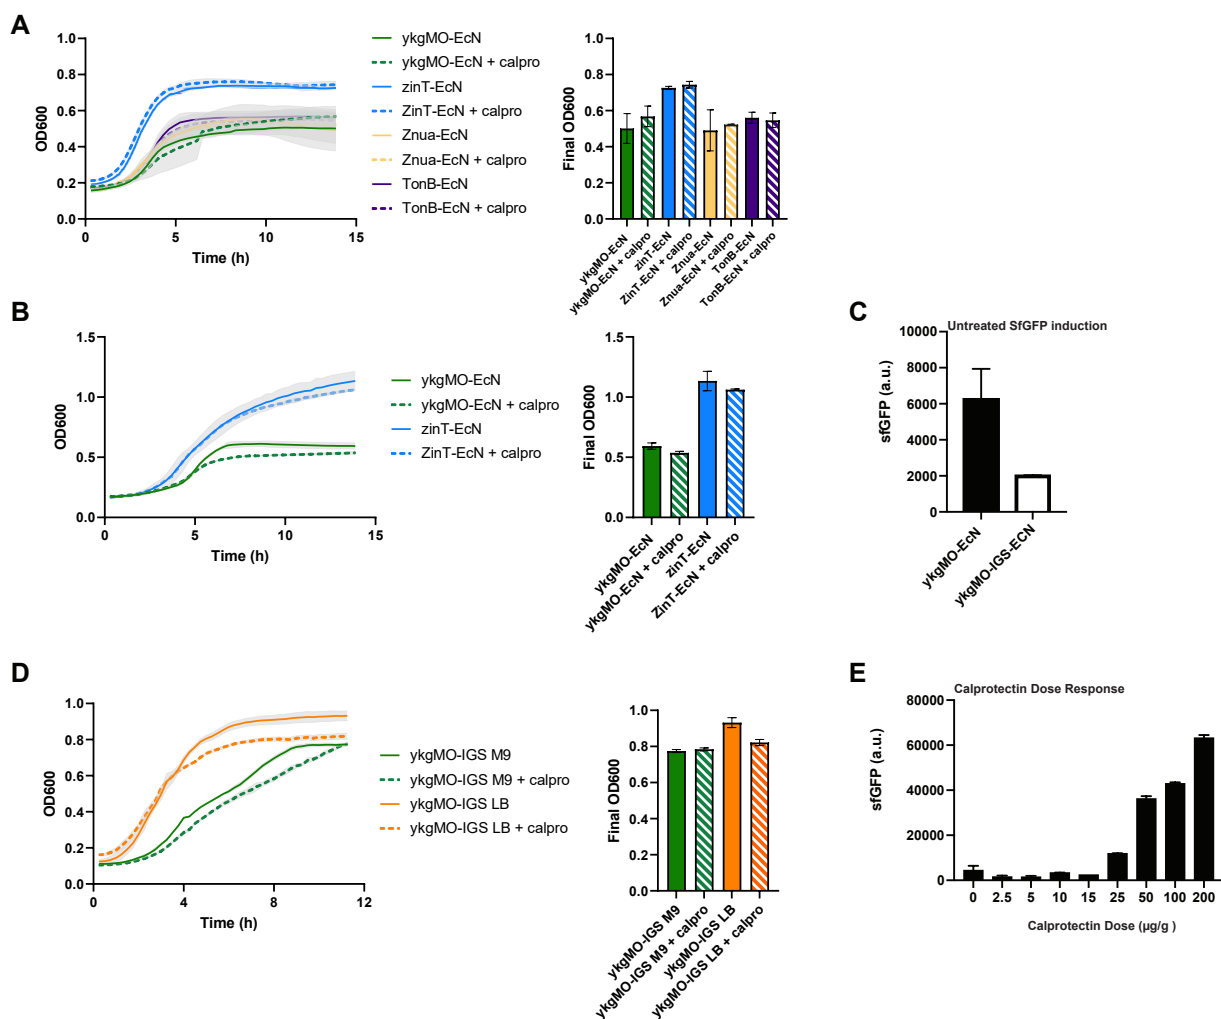

**Supplemental Fig. 2. EcN transformed with plasmids containing ykgMO, zinT, tonB, znuA, and ykgMO-IGS displayed similar growth patterns in the setting of calprotectin treatment in both M9 and LB media.**

(A) OD600 measurements during 13.8 hour growth curve and final OD600 at the end of growth curve for EcN transformed with plasmids containing ykgMO, zinT, tonB, znuA promoters with and without calprotectin in M9 media. (B) OD600 measurements during 13.8 hour growth curve and final OD600 at the end of growth curve for EcN transformed with plasmids containing ykgMO and zinT promoters with and without calprotectin in LB media. (C) Maximum sfGFP induction from ykgMO-EcN and ykgMO-IGS-EcN when untreated grown in M9 media. (D) OD600 measurements during 13.8 hour growth curve and final OD600 at the end of growth curve for EcN transformed with plasmids containing ykgMO-IGS promoter with and without calprotectin in both M9 and LB media. (E) Calprotectin dose response curve of ykgMO-IGS-EcN strain with varying doses of calprotectin grown in M9 media.

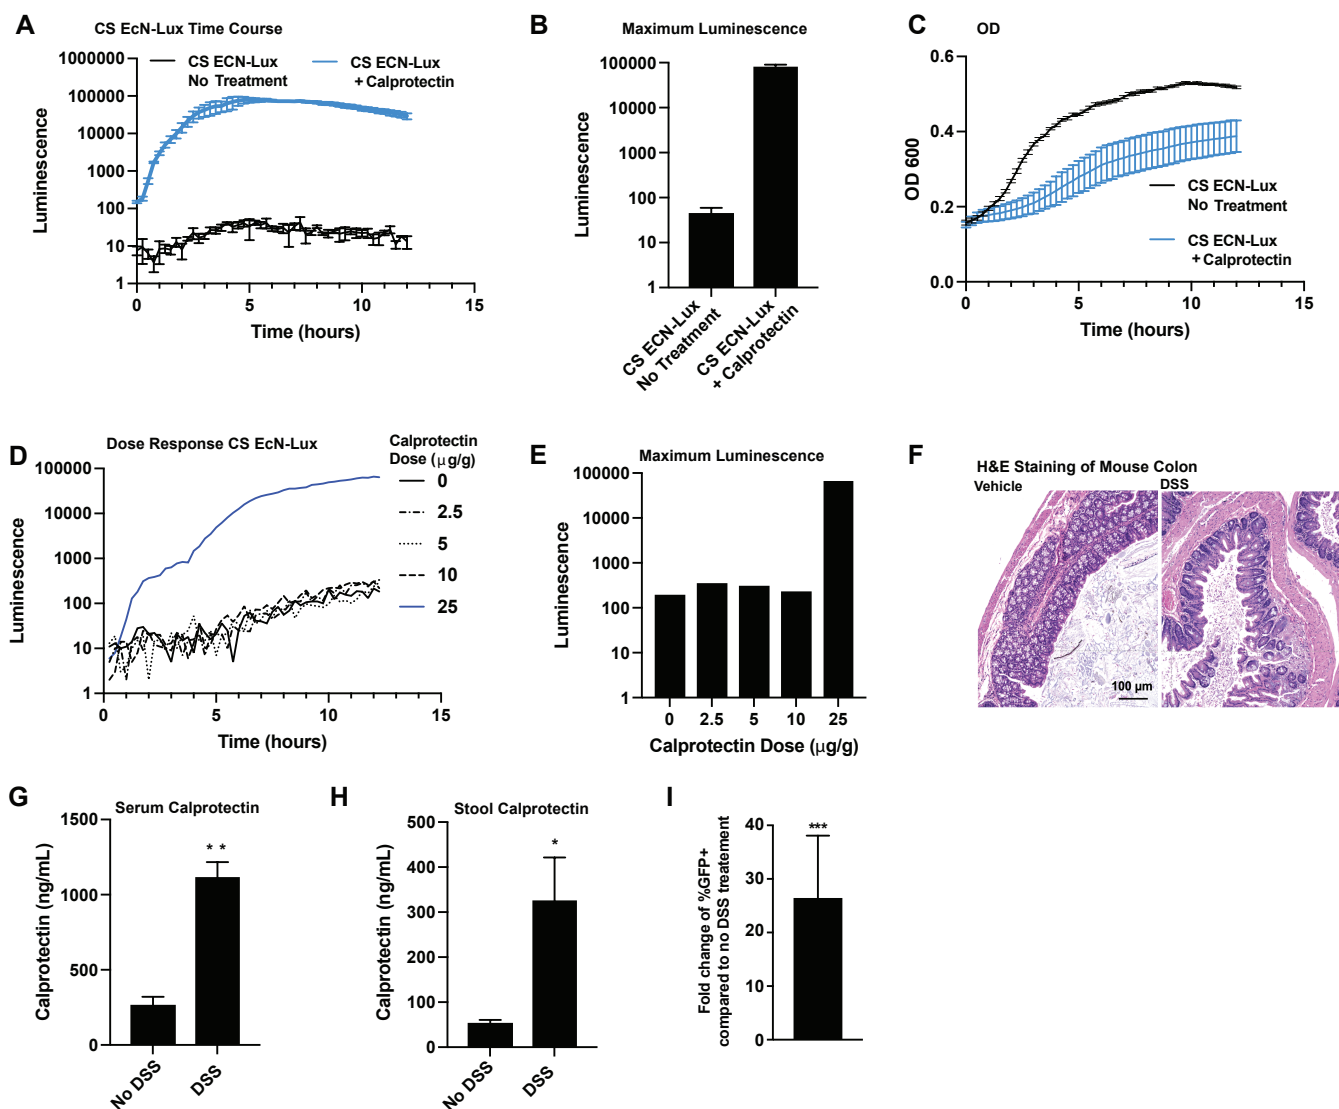

**Supplemental Fig. 3. Construction and validation of CS EcN-Lux for in vivo inflammation detection in DSS treated mice.**

(A) Luminescence was quantified by a BioTek Synergy Neo2 Multi-mode plate reader after CS EcN-Lux (n=3) was treated with 100 µg/g of calprotectin for 12.25 hours in M9 media. (B) Maximum Luminescence achieved by CS EcN-Lux after 100 µg/g of calprotectin compared to untreated controls during 12.25 hour growth curve in M9 media. (C) OD600 measurements during 12.25 hour growth curve for CS EcN-Lux (n=3) and CS EcN-Lux (n=3) treated with 100 µg/g of calprotectin in M9 media. (D) Calprotectin dose response curve of CS EcN-Lux strain with varying doses of calprotectin grown in M9 media. (E) Maximum Luminescence achieved by CS EcN-Lux during varying doses of calprotectin grown in M9 media. (F) Representative H&E staining of colons of mice treated with DSS and controls. (G-H) Serum and stool calprotectin levels of mice treated with DSS (n=5) and untreated controls (n=5). (I) Fold change of GFP positive cells present in stool of DSS-treated and control mice that were both gavaged with CS EcN-GFP.

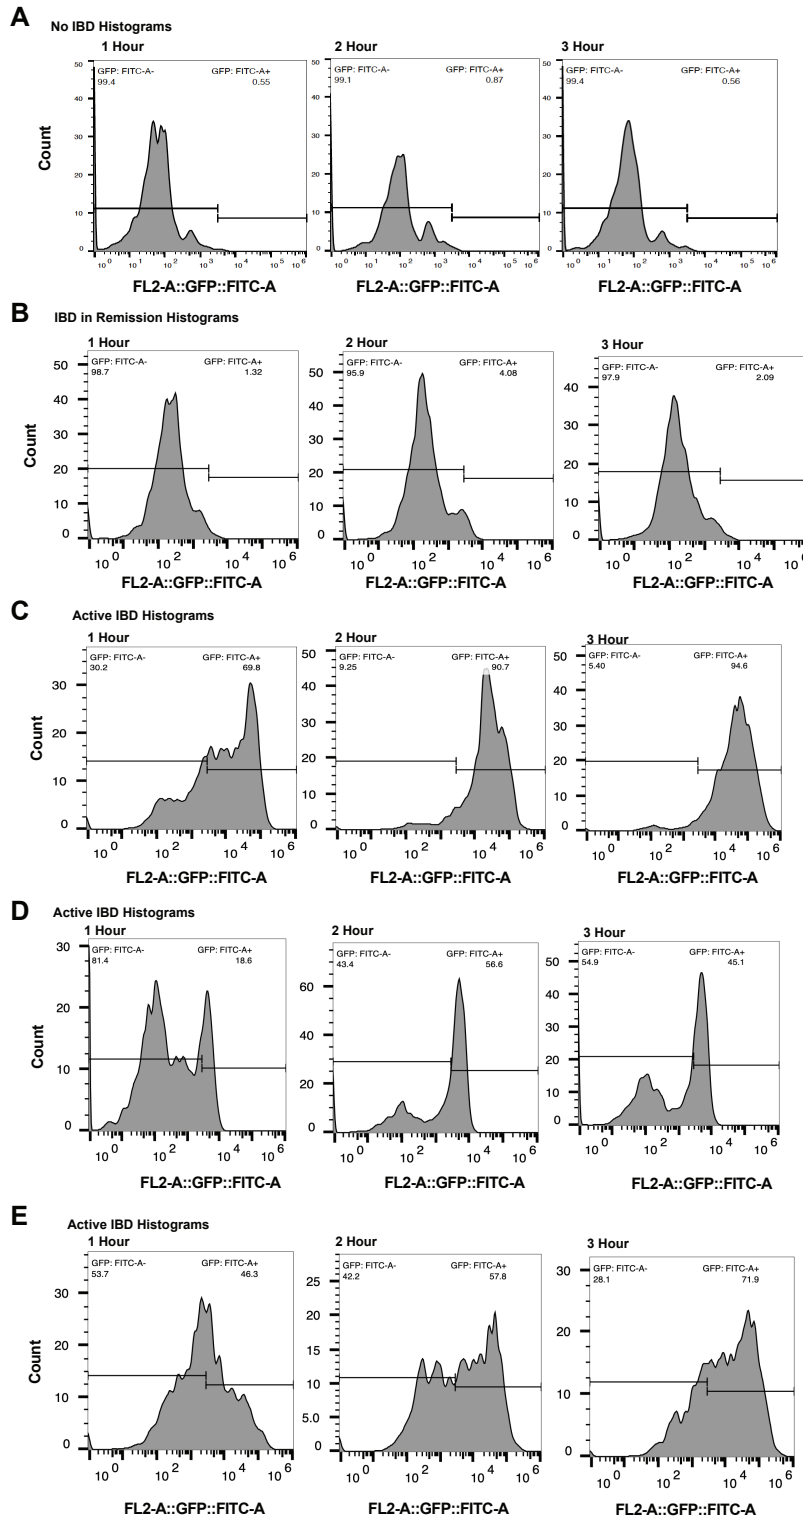

**Supplemental Fig. 4. Time course analysis of flow cytometry of human stool samples co-cultured with EcN-GFP.**

(A-E) Flow cytometry images quantifying GFP positive cell populations in CS EcN-GFP that were co-cultured with fecal samples of patients with no IBD, IBID in remission, and active IBID after 1, 2, and 3 hours.



**Supplemental Table 1: Statistically Differentially Expressed Genes M9**

| Gene Description                                                                                        | baseMean   | log2FoldChar | lfcSE      | stat       | padj       |
|---------------------------------------------------------------------------------------------------------|------------|--------------|------------|------------|------------|
| LSU ribosomal protein L31p @ LSU ribosomal protein L31p%2C zinc-independent                             | 4159.9521  | 8.3312552    | 0.22599637 | 36.8645538 | 2.02E-294  |
| LSU ribosomal protein L36p                                                                              | 1554.82149 | 7.8740522    | 0.22860914 | 34.4432955 | 4.47E-257  |
| FIG00638682: hypothetical protein                                                                       | 25967.6907 | 6.29642581   | 0.11411961 | 55.1739159 | 0          |
| Putative metal chaperone%2C involved in Zn homeostasis%2C GTPase of COG0523 family                      | 9273.1339  | 6.27532017   | 0.12902424 | 48.6367542 | 0          |
| membrane%3B Transport of small molecules: Cations                                                       | 22974.0827 | 6.02893123   | 0.11835208 | 50.9406463 | 0          |
| Candidate zinc-binding lipoprotein ZinT                                                                 | 13069.6575 | 5.97716781   | 0.17287756 | 34.5745736 | 5.76E-259  |
| Zinc ABC transporter%2C periplasmic-binding protein ZnuA                                                | 12598.5021 | 4.53923021   | 0.22522956 | 20.1537946 | 1.07E-87   |
| FIG00638093: hypothetical protein                                                                       | 2.89087556 | 3.55481229   | 1.37776426 | 2.580131   | 0.02321148 |
| Alpha-ketoglutarate permease                                                                            | 657.254932 | 3.50966298   | 0.15970969 | 21.9752658 | 2.53E-104  |
| Ornithine carbamoyltransferase                                                                          | 48486.8631 | 3.1397282    | 0.71084397 | 4.41690207 | 4.41E-05   |
| Enoyl-CoA hydratase                                                                                     | 354.42919  | 3.03978973   | 0.18249888 | 16.6564842 | 4.43E-60   |
| FIG01045439: hypothetical protein                                                                       | 5903.77371 | 3.02131138   | 0.11626351 | 25.9867547 | 4.13E-146  |
| Cell wall endopeptidase%2C family M23/M37                                                               | 4553.34112 | 2.84757025   | 0.10523714 | 27.0586049 | 2.04E-158  |
| Acetylglutamate kinase                                                                                  | 17147.9007 | 2.75949496   | 0.48893753 | 5.64386001 | 1.01E-07   |
| Argininosuccinate lyase                                                                                 | 25827.4056 | 2.75849349   | 0.44733493 | 6.16650588 | 5.00E-09   |
| L-2-hydroxyglutarate oxidase                                                                            | 670.483158 | 2.70879712   | 0.1524794  | 17.7650039 | 3.67E-68   |
| gamma-aminobutyrate (GABA) permease                                                                     | 360.740592 | 2.70530055   | 0.23211585 | 11.6549581 | 7.76E-30   |
| Uncharacterized GST-like protein yncG                                                                   | 18.8817548 | 2.61331432   | 0.54611683 | 4.78526604 | 8.38E-06   |
| N-acetyl-gamma-glutamyl-phosphate reductase                                                             | 14889.1258 | 2.57166721   | 0.51282599 | 5.01469746 | 2.76E-06   |
| 3-ketoadyl-CoA thiolase                                                                                 | 359.070086 | 2.56377676   | 0.15924776 | 16.0992951 | 3.49E-56   |
| Glycerol-3-phosphate ABC transporter%2C permease protein UgpA (TC 3.A.1.1.3)                            | 83.0643008 | 2.5256736    | 0.24621442 | 10.2580246 | 2.48E-23   |
| Biotin synthesis protein BioC                                                                           | 1289.76354 | 2.5035288    | 0.22607521 | 11.073876  | 4.79E-27   |
| Zinc ABC transporter%2C inner membrane permease protein ZnuB                                            | 1749.13293 | 2.46077146   | 0.15580722 | 15.7936934 | 4.40E-54   |
| Gamma-aminobutyrate:alpha-ketoglutarate aminotransferase                                                | 2265.85659 | 2.45062623   | 0.14005402 | 17.497722  | 2.94E-66   |
| hypothetical protein                                                                                    | 12.9929209 | 2.44502431   | 0.56971201 | 4.29168468 | 7.45E-05   |
| hypothetical protein                                                                                    | 60.5205562 | 2.4398318    | 0.26871669 | 9.07956928 | 1.81E-18   |
| FIG00642236: hypothetical protein                                                                       | 39.3546132 | 2.4325895    | 0.3594961  | 6.76852677 | 1.13E-10   |
| Succinate-semialdehyde dehydrogenase [NADP+]                                                            | 2125.23673 | 2.42537769   | 0.13749907 | 17.63923   | 2.91E-67   |
| Arginine ABC transporter%2C periplasmic arginine-binding protein ArtI                                   | 18931.5814 | 2.42457143   | 0.56726009 | 4.27417944 | 8.02E-05   |
| FIG00638909: hypothetical protein                                                                       | 204.639028 | 2.41927867   | 0.20973467 | 11.5349488 | 2.99E-29   |
| Adenosylmethionine-8-amino-7-oxononanoate aminotransferase                                              | 1853.29017 | 2.38824604   | 0.37357288 | 6.39298551 | 1.26E-09   |
| Glycerol-3-phosphate ABC transporter%2C permease protein UgpE (TC 3.A.1.1.3)                            | 128.939216 | 2.36525379   | 0.19913166 | 11.8778387 | 5.94E-31   |
| Phosphate starvation-inducible protein PhoH%2C predicted ATPase                                         | 61570.2327 | 2.31849404   | 0.21920568 | 10.5767972 | 9.31E-25   |
| Lactate-responsive regulator LldR in Enterobacteria%2C GntR family                                      | 322.357714 | 2.31743476   | 0.1989355  | 11.6491764 | 8.24E-30   |
| Arginine ABC transporter%2C permease protein ArtM                                                       | 2227.75402 | 2.31736913   | 0.18052094 | 12.8371209 | 5.28E-36   |
| Biotin synthase                                                                                         | 1339.7991  | 2.3076781    | 0.23161401 | 9.96346498 | 4.65E-22   |
| Arginine ABC transporter%2C permease protein ArtQ                                                       | 3671.57437 | 2.28785426   | 0.16005795 | 14.3563896 | 7.79E-45   |
| Acetyl-coenzyme A synthetase                                                                            | 1194.6021  | 2.28792776   | 0.14524013 | 15.7527234 | 8.19E-54   |
| N-acetylglutamate synthase                                                                              | 6238.6552  | 2.27788742   | 0.45685253 | 4.98604534 | 3.18E-06   |
| Dehydrobiotin synthetase                                                                                | 718.414487 | 2.26007124   | 0.1928098  | 11.7217653 | 3.62E-30   |
| aconitate hydratase                                                                                     | 3934.90816 | 2.25488876   | 0.11717414 | 19.2439105 | 5.01E-80   |
| Zinc ABC transporter%2C ATP-binding protein ZnuC                                                        | 3765.81775 | 2.21225687   | 0.14948652 | 14.7990389 | 1.41E-47   |
| Carbon starvation induced protein CsiD                                                                  | 299.49305  | 2.20914532   | 0.14958523 | 14.7684724 | 2.05E-47   |
| putative protein PaaI%2C possibly involved in aromatic compounds catabolism                             | 301.064824 | 2.18357964   | 0.17675121 | 12.3539728 | 2.17E-33   |
| Nitrate/nitrite transporter                                                                             | 1028.59898 | 2.17547684   | 0.19574188 | 11.1140081 | 3.11E-27   |
| Arginine N-succinyltransferase                                                                          | 177.240431 | 2.15628012   | 0.17364571 | 12.4176986 | 1.00E-33   |
| Succinylglutamic semialdehyde dehydrogenase                                                             | 368.976354 | 2.14284619   | 0.13304314 | 16.1064012 | 3.20E-56   |
| Respiratory nitrate reductase beta chain                                                                | 1141.26917 | 2.09270382   | 0.17792273 | 11.7618685 | 2.27E-30   |
| L-lactate permease                                                                                      | 412.007405 | 2.07994456   | 0.17857911 | 11.6471888 | 8.37E-30   |
| Arginine ABC transporter%2C ATP-binding protein ArtP                                                    | 3371.88701 | 2.06368388   | 0.18060039 | 11.4267964 | 9.96E-29   |
| Respiratory nitrate reductase alpha chain                                                               | 3188.60171 | 2.05736744   | 0.18716753 | 10.9921171 | 1.17E-26   |
| Stage V sporulation protein involved in spore cortex synthesis (SpoVR)                                  | 7392.3733  | 2.05591422   | 0.13989267 | 14.6963688 | 5.85E-47   |
| Argininosuccinate synthase                                                                              | 24521.9554 | 2.04264795   | 0.40166557 | 5.0854446  | 1.95E-06   |
| Glycerol-3-phosphate ABC transporter%2C ATP-binding protein UgpC (TC 3.A.1.1.3)                         | 1062.91148 | 2.03803907   | 0.14458576 | 14.095711  | 2.94E-43   |
| Acetylornithine aminotransferase                                                                        | 3047.65923 | 2.02668277   | 0.46953003 | 4.31640717 | 6.69E-05   |
| Respiratory nitrate reductase delta chain                                                               | 451.462866 | 2.01650704   | 0.17316205 | 11.6452017 | 8.51E-30   |
| UPF0229 protein Yeah                                                                                    | 5606.61024 | 2.01597121   | 0.18256319 | 11.0425943 | 6.74E-27   |
| FIG00638803: hypothetical protein                                                                       | 30.8688754 | 1.95284866   | 0.40544939 | 4.81650409 | 7.20E-06   |
| Glycolate dehydrogenase                                                                                 | 518.888175 | 1.9433716    | 0.14750735 | 13.1747444 | 6.99E-38   |
| Succinylglutamate desuccinylase                                                                         | 204.099759 | 1.9386221    | 0.17483733 | 11.0881476 | 4.11E-27   |
| Malate:quinone oxidoreductase                                                                           | 1933.89006 | 1.90891269   | 0.18082156 | 10.5568863 | 1.15E-24   |
| Serine protein kinase (prkA protein)%2C P-loop containing                                               | 25603.7954 | 1.90382375   | 0.17891245 | 10.6409846 | 4.86E-25   |
| Arginine ABC transporter%2C periplasmic arginine-binding protein ArtI                                   | 8730.75211 | 1.90332833   | 0.14880242 | 12.7909766 | 9.47E-36   |
| Cold shock protein CspG                                                                                 | 1632.47579 | 1.87577392   | 0.14127639 | 13.2773345 | 1.83E-38   |
| 8-amino-7-oxononanoate synthase                                                                         | 2315.43297 | 1.87036375   | 0.2045578  | 9.14344878 | 1.01E-18   |
| Protein ygiW precursor                                                                                  | 577.797212 | 1.85821061   | 0.18179045 | 10.2217172 | 3.54E-23   |
| L-proline glycine betaine binding ABC transporter protein ProX (TC 3.A.1.12.1)                          | 1589.38934 | 1.7859385    | 0.21262462 | 8.3994905  | 6.11E-16   |
| Succinylarginine dihydrolase                                                                            | 392.851807 | 1.77355483   | 0.18166639 | 9.76270186 | 3.16E-21   |
| Acetolactate synthase small subunit                                                                     | 409.102322 | 1.77355483   | 0.18166639 | 9.76270186 | 3.16E-21   |
| LysR family transcriptional regulator YdcI                                                              | 558.785888 | 1.76641842   | 0.15754107 | 11.2124315 | 1.06E-27   |
| hypothetical protein                                                                                    | 64.5176293 | 1.74921143   | 0.26407358 | 6.62395476 | 2.90E-10   |
| Glycerol-3-phosphate ABC transporter%2C periplasmic glycerol-3-phosphate-binding protein (TC 3.A.1.1.3) | 640.094984 | 1.73470655   | 0.12292486 | 14.1119258 | 2.37E-43   |
| Curli production assembly/transport component CsgF                                                      | 262.188668 | 1.73138803   | 0.14452542 | 11.9798166 | 1.88E-31   |
| Alanine racemase                                                                                        | 6420.7976  | 1.72108186   | 0.11927149 | 14.4299518 | 2.78E-45   |
| Citrate synthase (si)                                                                                   | 34824.5074 | 1.70310613   | 0.14184524 | 12.0067908 | 1.40E-31   |
| Acetolactate synthase large subunit                                                                     | 2333.06692 | 1.69324772   | 0.23809106 | 7.11176526 | 1.09E-11   |
| Osmotically inducible protein OsmY                                                                      | 30903.101  | 1.67223355   | 0.15786338 | 10.5929162 | 7.92E-25   |
| Glycolate utilization operon transcriptional activator GlcC                                             | 369.171499 | 1.66962128   | 0.15665839 | 10.6577202 | 4.13E-25   |
| FIG01220641: hypothetical protein                                                                       | 1440.35321 | 1.66167965   | 0.15052279 | 11.0393888 | 6.95E-27   |
| Lysine-arginine-ornithine-binding periplasmic protein precursor (TC 3.A.1.3.1)                          | 90.0433688 | 1.6591965    | 0.22087604 | 7.51188981 | 6.15E-13   |
| HTH-type transcriptional regulator gadW                                                                 | 737.09523  | 1.6538028    | 0.18846372 | 8.77517836 | 2.56E-17   |
| Lysine-arginine-ornithine-binding periplasmic protein precursor (TC 3.A.1.3.1)                          | 23.816311  | 1.65163231   | 0.40618903 | 4.06616668 | 0.00018749 |
| Succinate dehydrogenase iron-sulfur protein                                                             | 3179.61141 | 1.64126201   | 0.12044408 | 13.6267557 | 1.78E-40   |
| UPF0410 protein YmgE                                                                                    | 74.6591253 | 1.64074541   | 0.28984438 | 5.66078051 | 9.23E-08   |
| FIG00638507: hypothetical protein                                                                       | 9.3773631  | 1.63980538   | 0.57133538 | 2.87012749 | 0.01062485 |
| L-lactate dehydrogenase                                                                                 | 1384.85743 | 1.63879718   | 0.10848368 | 15.1063931 | 1.51E-49   |
| Osmoprotectant ABC transporter permease protein YehY                                                    | 414.760017 | 1.62717031   | 0.15302089 | 10.6336484 | 5.23E-25   |
| Succinate dehydrogenase flavoprotein subunit                                                            | 4475.24257 | 1.60789453   | 0.1343579  | 11.9672499 | 2.17E-31   |
| Hypothetical protein ycgF                                                                               | 475.646157 | 1.60696297   | 0.15052287 | 10.6758725 | 3.45E-25   |
| FIG00639204: hypothetical protein                                                                       | 85.7799927 | 1.59572256   | 0.23995498 | 6.65009152 | 2.45E-10   |
| Putative cytoplasmic protein                                                                            | 467.832544 | 1.59545865   | 0.15424342 | 10.3437711 | 1.03E-23   |
| Sodium-dependent phosphate transporter                                                                  | 1825.26224 | 1.56527849   | 0.13442449 | 11.6442951 | 8.53E-30   |
| Glycolate dehydrogenase                                                                                 | 316.21172  | 1.56111611   | 0.13078079 | 11.9368916 | 3.07E-31   |
| Di/tripeptide permease YbgH                                                                             | 5458.50101 | 1.55810339   | 0.22010999 | 7.07874893 | 1.37E-11   |
| Arginine/ornithine antiporter ArcD                                                                      | 428.803072 | 1.55502683   | 0.17738436 | 8.76642583 | 2.76E-17   |
| Cell filamentation protein fic                                                                          | 1697.96776 | 1.54949436   | 0.13730503 | 11.2850514 | 4.78E-28   |
| Alkanesulfonate utilization operon LysR-family regulator Cbl                                            | 683.118156 | 1.53640082   | 0.09878491 | 15.5529911 | 1.71E-52   |
| Acetylornithine deacetylase                                                                             | 6752.05556 | 1.5354763    | 0.1685994  | 9.10724665 | 1.41E-18   |
| FIG00638355: hypothetical protein                                                                       | 2064.28686 | 1.53272782   | 0.13127301 | 11.6758795 | 6.11E-30   |
| Curli production assembly/transport component CsgE                                                      | 294.578471 | 1.5247585    | 0.16098944 | 9.47117064 | 5.02E-20   |
| Trehalose-6-phosphate phosphatase                                                                       | 1161.2132  | 1.52074027   | 0.13313659 | 11.4224066 | 1.04E-28   |
| Hypothetical ABC transporter ATP-binding protein yddA                                                   | 413.312735 | 1.51451555   | 0.14251298 | 10.6272171 | 5.57E-25   |
| FIG00643276: hypothetical protein                                                                       | 115.267439 | 1.51311685   | 0.22109387 | 6.84377583 | 8.68E-11   |
| Putrescine transport system permease protein PotH (TC 3.A.1.11.2)                                       | 2097.23737 | 1.50982166   | 0.14572669 | 10.3606394 | 8.73E-24   |
| Cytochrome B561                                                                                         | 172.726442 | 1.50980885   | 0.15269811 | 9.88754142 | 9.74E-22   |

|                                                                                        |             |            |            |             |            |
|----------------------------------------------------------------------------------------|-------------|------------|------------|-------------|------------|
| D-amino acid dehydrogenase small subunit                                               | 7215.43682  | 1.49694753 | 0.16211022 | 9.23413394  | 4.45E-19   |
| FIG01045643: hypothetical protein                                                      | 40.3110779  | 1.49571975 | 0.34281058 | 4.36310845  | 5.50E-05   |
| Putrescine transport ATP-binding protein PotA (TC 3.A.1.11.1)                          | 287.1601716 | 1.49419856 | 0.15043459 | 9.93254665  | 6.26E-22   |
| L-proline glycine betaine ABC transport system permease protein ProW (TC 3.A.1.12.1)   | 1250.61763  | 1.48525295 | 0.18762505 | 9.71609666  | 2.94E-14   |
| Glycolate permease                                                                     | 113.486833  | 1.48524678 | 0.20041436 | 7.41088016  | 1.27E-12   |
| Glutamate Aspartate transport system permease protein Glu (TC 3.A.1.3.4)               | 144.636946  | 1.47764579 | 0.22479431 | 6.57323383  | 3.98E-10   |
| Starvation sensing protein RspA                                                        | 76.6017634  | 1.47756747 | 0.23647422 | 6.24832358  | 3.03E-09   |
| Putrescine transport ATP-binding protein PotG (TC 3.A.1.11.2)                          | 4217.36034  | 1.47543614 | 0.17017627 | 8.67004652  | 6.33E-17   |
| Putative exported protein                                                              | 3900.09451  | 1.47395035 | 0.14410729 | 10.22814456 | 3.33E-23   |
| Outer membrane lipoprotein B1c                                                         | 2342.23673  | 1.47123107 | 0.16876283 | 8.71174339  | 4.18E-17   |
| Glutamate Aspartate transport system permease protein GitK (TC 3.A.1.3.4)              | 873.639845  | 1.46603932 | 0.13770927 | 10.6459014  | 4.63E-25   |
| Succinate dehydrogenase hydrophobic membrane anchor protein                            | 577.867346  | 1.46565141 | 0.18916037 | 7.7481947   | 1.05E-13   |
| Glycoprotein-polysaccharide metabolism                                                 | 6906.81452  | 1.46338258 | 0.12940945 | 11.3081587  | 3.70E-28   |
| FIG00639943: hypothetical protein                                                      | 3931.58384  | 1.4508654  | 0.1073333  | 13.5173837  | 7.69E-40   |
| Phage protein                                                                          | 14.9049411  | 1.44478783 | 0.45055389 | 3.20669258  | 0.00392119 |
| Acyl-CoA dehydrogenases                                                                | 1423.93951  | 1.44291728 | 0.1200042  | 12.02389    | 1.16E-31   |
| Protein YcGL                                                                           | 897.180231  | 1.42710663 | 0.08443172 | 16.902493   | 7.56E-62   |
| L-proline glycine betaine ABC transport system permease protein ProV (TC 3.A.1.12.1)   | 2026.02263  | 1.41290464 | 0.16690565 | 8.4652894   | 3.56E-16   |
| FIG00638676: hypothetical protein                                                      | 189.559569  | 1.40644563 | 0.27613353 | 5.09335326  | 1.88E-06   |
| Succinate dehydrogenase cytochrome b-556 subunit                                       | 693.509918  | 1.4013063  | 0.17258917 | 8.11931786  | 5.85E-15   |
| ID=gene:EBG00000313225                                                                 | 35.873071   | 1.39895816 | 0.3726309  | 3.75427311  | 0.00061469 |
| Isochitrate lyase                                                                      | 1920.08317  | 1.39605339 | 0.13367774 | 10.4434245  | 3.73E-24   |
| Probable secreted protein                                                              | 5708.78007  | 1.3853089  | 0.19327193 | 7.16766731  | 7.28E-12   |
| FIG005189: putative transferase clustered with tellurite resistance proteins TehA/TehB | 405.301792  | 1.38435325 | 0.17983866 | 7.69775115  | 1.55E-13   |
| probable beta-D-galactosidase                                                          | 16.3543351  | 1.38194402 | 0.46475649 | 2.97347975  | 0.00790587 |
| Putative carboxymethylglutamate lyase                                                  | 4107.68282  | 1.38108398 | 0.12157808 | 11.3596467  | 2.07E-28   |
| Putrescine ABC transporter putrescine-binding protein PotF (TC 3.A.1.11.2)             | 10915.3739  | 1.37657022 | 0.17405744 | 7.90871219  | 3.11E-14   |
| ID=gene:EBG00000313252                                                                 | 13.8319692  | 1.37113974 | 0.52116544 | 2.63091072  | 0.02033695 |
| FIG00638962: hypothetical protein                                                      | 24.4875929  | 1.37057157 | 0.33194479 | 4.12891423  | 0.00014454 |
| Transcriptional regulator CsgD for 2nd curli operon                                    | 800.609456  | 1.36304987 | 0.1440057  | 9.46524918  | 5.29E-20   |
| Glutamate Aspartate transport system permease protein Glu (TC 3.A.1.3.4)               | 1177.06183  | 1.35530507 | 0.11307496 | 11.9858987  | 1.76E-31   |
| Acetolactate synthase small subunit                                                    | 3558.38002  | 1.35378027 | 0.13748721 | 9.84659041  | 1.43E-21   |
| Transcriptional regulator%2C GntR family                                               | 38.0702289  | 1.35156777 | 0.28564734 | 4.73159578  | 1.08E-05   |
| Butyryl-CoA dehydrogenase                                                              | 1034.52859  | 1.34937577 | 0.15139905 | 8.91270967  | 7.91E-18   |
| Periplasmic protein YajC                                                               | 4663.72542  | 1.34815375 | 0.11293206 | 11.9377416  | 3.07E-31   |
| ATP-dependent Clp protease ATP-binding subunit ClpA                                    | 94182.8776  | 1.34744501 | 0.14497376 | 9.29440651  | 2.60E-19   |
| FIG00637934: hypothetical protein                                                      | 112.229574  | 1.34662686 | 0.17693238 | 7.61096893  | 2.98E-13   |
| Sulfite reductase [NADPH] flavoprotein alpha-component                                 | 5892.88834  | 1.34549301 | 0.12009611 | 11.2034683  | 1.16E-27   |
| Succinylornithine transaminase                                                         | 171.361996  | 1.33787806 | 0.1780604  | 7.51361915  | 6.09E-13   |
| Putrescine transport system permease protein PotI (TC 3.A.1.11.2)                      | 1604.10313  | 1.33342902 | 0.12689478 | 10.5081473  | 1.89E-24   |
| Respiratory nitrate reductase gamma chain                                              | 380.18954   | 1.32751687 | 0.1850988  | 7.17193644  | 7.10E-12   |
| Malate synthase                                                                        | 1424.61401  | 1.32712465 | 0.13588778 | 9.76632836  | 3.06E-21   |
| Histidine ABC transporter%2C permease protein HisM (TC 3.A.1.3.1)                      | 2070.31042  | 1.32346433 | 0.16736302 | 7.90774652  | 3.12E-14   |
| HTH-type transcriptional regulator gadX                                                | 2462.3037   | 1.32239138 | 0.17338513 | 7.626902    | 2.65E-13   |
| Curli production assembly/transport component CsgG                                     | 911.292567  | 1.32082531 | 0.14150884 | 9.33387163  | 1.82E-19   |
| Spermidine Putrescine ABC transporter permease component potC (TC_3.A.1.11.1)          | 162.000192  | 1.32013653 | 0.19735668 | 6.68908964  | 1.91E-10   |
| FIG00638205: hypothetical protein                                                      | 20.1385186  | 1.315778   | 0.3629054  | 3.62567766  | 0.00097323 |
| YcgN (Fragment)                                                                        | 705.891695  | 1.31428229 | 0.09345734 | 14.0629113  | 4.60E-43   |
| type 1 fimbriae regulatory protein FimB                                                | 15.3718119  | 1.30906096 | 0.40096806 | 3.26475121  | 0.00326199 |
| Alpha%2Calpha-trehalose-phosphate synthase [UDP-forming]                               | 2813.45187  | 1.30717597 | 0.15866748 | 8.23846182  | 2.26E-15   |
| Taurine-binding periplasmic protein TauA                                               | 455.779725  | 1.30380918 | 0.19292728 | 6.75803432  | 1.21E-10   |
| Alkanesulfonates transport system permease protein                                     | 288.82546   | 1.30326789 | 0.21074289 | 6.18416074  | 4.50E-09   |
| Blue copper oxidase CueO precursor                                                     | 4279.56105  | 1.30289993 | 0.10932778 | 11.9173731  | 3.85E-31   |
| Mobile element protein                                                                 | 92.5412217  | 1.29637317 | 0.25709891 | 5.04231296  | 2.42E-06   |
| Cold shock protein CspA                                                                | 21580.2587  | 1.29607563 | 0.15378701 | 8.42773141  | 4.85E-16   |
| Sulfate and thiosulfate binding protein CysP                                           | 8429.56124  | 1.29433418 | 0.1328356  | 9.74388052  | 3.78E-21   |
| Two-component system response regulator QseB                                           | 140.060131  | 1.29024498 | 0.21472332 | 6.00887213  | 1.27E-08   |
| probable secreted protein STY4010                                                      | 35.1837626  | 1.2899594  | 0.27573922 | 4.67818623  | 1.38E-05   |
| Putative integral membrane protein                                                     | 501.526734  | 1.28277684 | 0.11781229 | 10.888311   | 3.60E-26   |
| Osmoprotectant ABC transporter ATP-binding subunit YehX                                | 493.129345  | 1.27971978 | 0.16854874 | 7.59258002  | 3.42E-13   |
| Entericidin B precursor                                                                | 78.3067711  | 1.27604062 | 0.35374162 | 3.60726736  | 0.001039   |
| Stationary phase inducible protein CsiE                                                | 550.666224  | 1.27521177 | 0.16981977 | 7.50920657  | 6.27E-13   |
| FIG00641190: hypothetical protein                                                      | 179.026192  | 1.27440096 | 0.2095595  | 6.08133238  | 8.33E-09   |
| FIG00637999: hypothetical protein                                                      | 3600.36341  | 1.26889329 | 0.13075501 | 9.70435658  | 5.51E-21   |
| Osmoprotectant ABC transporter binding protein YehZ                                    | 755.753134  | 1.2608289  | 0.1286912  | 9.79732017  | 2.28E-21   |
| Sulfate transport system permease protein CysT                                         | 3652.59024  | 1.25678839 | 0.09700828 | 12.955476   | 1.19E-36   |
| NAD(P)H-flavin oxidoreductase                                                          | 80.173648   | 1.25333433 | 0.26895758 | 4.65997023  | 1.50E-05   |
| TsgA protein homolog                                                                   | 611.596422  | 1.24759749 | 0.14905716 | 8.36992645  | 7.79E-16   |
| Protein rarD                                                                           | 321.594568  | 1.24369949 | 0.14640029 | 8.49519833  | 2.79E-16   |
| Glutamate Aspartate transport ATP-binding protein GitL (TC 3.A.1.3.4)                  | 1524.36584  | 1.2433861  | 0.09854679 | 12.617215   | 8.36E-35   |
| prophage DLP12 integrase                                                               | 24.2696031  | 1.23887163 | 0.33881367 | 3.65649839  | 0.00087402 |
| Iron-sulfur cluster assembly protein SufB                                              | 5462.36463  | 1.23784742 | 0.12922359 | 9.57911324  | 1.79E-20   |
| FIG00639538: hypothetical protein                                                      | 1437.65365  | 1.23729205 | 0.15073669 | 8.20830069  | 2.87E-15   |
| Putrescine aminotransferase                                                            | 4480.12917  | 1.23271237 | 0.13971894 | 8.82280089  | 1.69E-17   |
| Lead%2C cadmium%2C zinc and mercury transporting ATPase                                | 55227.1043  | 1.23054577 | 0.11438139 | 10.7582689  | 1.46E-25   |
| Zinc transporter ZitB                                                                  | 483.303353  | 1.22860771 | 0.13019733 | 9.43650475  | 1.96E-20   |
| Endonuclease/Exonuclease/phosphatase family protein                                    | 1032.47372  | 1.22724867 | 0.2145576  | 5.71990297  | 6.64E-08   |
| Selenoprotein O and cysteine-containing homologs                                       | 1577.93817  | 1.22508991 | 0.14134317 | 8.66748562  | 6.45E-17   |
| Lipid A biosynthesis (KDO) 2-(lauroyl)-lipid IVA acyltransferase                       | 848.062346  | 1.22174028 | 0.09996978 | 12.2210955  | 1.11E-32   |
| Inner membrane protein YphA                                                            | 1344.72815  | 1.22076027 | 0.14835622 | 8.22857512  | 2.44E-15   |
| Iron binding protein SufA for iron-sulfur cluster assembly                             | 1414.94436  | 1.21311064 | 0.12083103 | 10.0397274  | 2.20E-22   |
| Sulfur acceptor protein SufE for iron-sulfur cluster assembly                          | 1303.3253   | 1.21039156 | 0.13120826 | 9.22496469  | 4.83E-19   |
| L%2CD-transpeptidase YcbB                                                              | 12615.5579  | 1.20940043 | 0.06878363 | 17.5826772  | 7.19E-67   |
| Cell division protein BolA                                                             | 6060.4257   | 1.20853954 | 0.1812269  | 6.66865445  | 2.19E-10   |
| Histidine ABC transporter%2C ATP-binding protein HisP (TC 3.A.1.3.1)                   | 1201.20657  | 1.20818956 | 0.15962446 | 7.56895022  | 4.05E-13   |
| hypothetical protein                                                                   | 56.6333403  | 1.20421195 | 0.23461327 | 5.13275298  | 1.55E-06   |
| Potassium efflux system KefA protein / Small-conductance mechanosensitive channel      | 642.460302  | 1.20370158 | 0.12053908 | 9.98598611  | 3.74E-22   |
| Putative transport protein                                                             | 36.3232535  | 1.20141205 | 0.33505848 | 3.58567875  | 0.00112012 |
| probable ribonuclease inhibitor YPO3690                                                | 97.9696432  | 1.20055075 | 0.25132875 | 4.77681415  | 8.70E-06   |
| ID=gene:EBG00000313286                                                                 | 212.767355  | 1.20019157 | 0.18320794 | 6.55098022  | 4.56E-10   |
| ID=gene:EBG00000313289                                                                 | 212.767355  | 1.20019157 | 0.18320794 | 6.55098022  | 4.56E-10   |
| Osmoprotectant ABC transporter inner membrane protein YehW                             | 296.185709  | 1.1977575  | 0.21646158 | 5.53334921  | 1.83E-07   |
| Selenoprotein O and cysteine-containing homologs                                       | 411.255081  | 1.19134138 | 0.12691559 | 9.38687955  | 1.10E-19   |
| FIG00638313: hypothetical protein                                                      | 36.6273069  | 1.18756783 | 0.42820925 | 2.7733353   | 0.0139183  |
| FIG143828: Hypothetical protein YbgA                                                   | 1097.87101  | 1.18657609 | 0.14485182 | 8.1916545   | 3.28E-15   |
| Glycolate dehydrogenase                                                                | 515.223131  | 1.1837964  | 0.09789022 | 12.0931021  | 5.08E-32   |
| Alkanesulfonates-binding protein                                                       | 437.0333    | 1.1834963  | 0.25000504 | 4.73388981  | 1.07E-05   |
| Inner membrane protein YbhQ                                                            | 430.859742  | 1.17345603 | 0.17619743 | 6.65989296  | 2.32E-10   |
| Inner membrane protein YhjD                                                            | 663.602518  | 1.17061217 | 0.10265609 | 11.403241   | 1.27E-28   |
| Invasin                                                                                | 37.5013204  | 1.16965378 | 0.29081303 | 4.02201299  | 0.00022432 |
| Putative membrane protein%2C clustering with ActP                                      | 73.0636633  | 1.16751026 | 0.25443648 | 4.58861198  | 2.07E-05   |
| Putative transport protein                                                             | 208.641741  | 1.14947173 | 0.17382625 | 6.61276276  | 3.10E-10   |
| Deoxyribodipyrimidine photolase                                                        | 3283.44819  | 1.14896471 | 0.12494887 | 9.19547921  | 6.33E-19   |
| Superoxide dismutase [Cu-Zn] precursor                                                 | 1074.71181  | 1.14738098 | 0.16800976 | 6.82925212  | 7.55E-11   |
| Probable glutathione S-transferase                                                     | 250.711631  | 1.14484232 | 0.21926244 | 5.22133342  | 9.84E-07   |
| Putative inner membrane protein                                                        | 116.456038  | 1.14458065 | 0.18443492 | 6.20587826  | 3.93E-09   |
| Acetolactate synthase large subunit                                                    | 11164.8352  | 1.14144822 | 0.19045023 | 5.99341989  | 1.38E-08   |

|                                                                                                 |            |            |            |            |            |
|-------------------------------------------------------------------------------------------------|------------|------------|------------|------------|------------|
| Glucans biosynthesis protein C                                                                  | 130.056986 | 1.13804521 | 0.17850539 | 6.37541103 | 1.40E-09   |
| UPF0319 protein YccT precursor                                                                  | 243.785649 | 1.13787671 | 0.16007722 | 7.10829873 | 1.11E-11   |
| ID=gene:EBG0000313288                                                                           | 153.617788 | 1.13443822 | 0.45152086 | 2.5124824  | 0.02757299 |
| L%2CD-transpeptidase YnhG                                                                       | 5259.74533 | 1.13050984 | 0.12241282 | 9.23522411 | 4.42E-19   |
| Ren protein                                                                                     | 141.460007 | 1.1267051  | 0.16410051 | 6.86594508 | 5.93E-11   |
| Sialic acid-induced transmembrane protein YjHT(NanM)%2C possible mutarotase                     | 6227.37332 | 1.12668604 | 0.13029278 | 8.64734076 | 7.60E-17   |
| Putative Heme-regulated two-component response regulator                                        | 425.787979 | 1.12279314 | 0.19887492 | 5.64572529 | 1.00E-07   |
| FIG00638107: hypothetical protein                                                               | 1384.09237 | 1.11989909 | 0.17583857 | 6.36890482 | 1.46E-09   |
| Malate dehydrogenase                                                                            | 14083.8596 | 1.11935875 | 0.09231464 | 12.1254741 | 3.49E-32   |
| Spermidine Putrescine ABC transporter permease component PotB (TC 3.A.1.11.1)                   | 157.471351 | 1.11473306 | 0.183928   | 6.06070356 | 9.39E-09   |
| FIG00639812: hypothetical protein                                                               | 46.6355368 | 1.11392812 | 0.3273927  | 3.40242196 | 0.00208437 |
| FIG00638559: hypothetical protein                                                               | 2179.16649 | 1.10278    | 0.17017454 | 6.48028793 | 7.23E-10   |
| ID=gene:EBG00000313283                                                                          | 59.5437031 | 1.101558   | 0.28345462 | 3.88618818 | 0.00037667 |
| ID=gene:EBG00000313290                                                                          | 59.5437031 | 1.101558   | 0.28345462 | 3.88618818 | 0.00037667 |
| putative transport                                                                              | 338.028838 | 1.09882581 | 0.17459921 | 6.29341819 | 2.30E-09   |
| multidrug resistance protein A                                                                  | 14.4490862 | 1.09657946 | 0.43568544 | 2.51690635 | 0.02728224 |
| Iron-sulfur cluster assembly protein SufD                                                       | 8512.39007 | 1.09321702 | 0.11441797 | 9.55459195 | 2.27E-20   |
| ATP-dependent RNA helicase                                                                      | 1246.69568 | 1.09238269 | 0.13090253 | 8.34500838 | 9.49E-16   |
| Cardiolipin synthetase                                                                          | 1507.28476 | 1.09008279 | 0.16910955 | 6.44601567 | 8.99E-10   |
| Choline dehydrogenase                                                                           | 34272.1579 | 1.08675616 | 0.08454828 | 12.8536763 | 4.31E-36   |
| Probable zinc protease pqqL                                                                     | 1415.93612 | 1.08247899 | 0.17067342 | 6.34239927 | 1.72E-09   |
| Transaldolase                                                                                   | 3969.27961 | 1.07947998 | 0.13805567 | 7.81916457 | 6.15E-14   |
| Glutamate Aspartate periplasmic binding protein precursor GltI (TC 3.A.1.3.4)                   | 548.82202  | 1.07848578 | 0.18625924 | 5.79009553 | 4.46E-08   |
| MFS permease protein                                                                            | 59.8452248 | 1.0777071  | 0.25299801 | 4.25974531 | 8.51E-05   |
| ABC transporter%2C periplasmic spermidine putrescine-binding protein PotD (TC 3.A.1.11.1)       | 797.100072 | 1.07655882 | 0.14951128 | 7.20051911 | 5.82E-12   |
| Dihydroxy-acid dehydratase                                                                      | 24010.8344 | 1.07414467 | 0.1318594  | 8.14613646 | 4.74E-15   |
| Sulfate transport system permease protein CysW                                                  | 5532.30943 | 1.07359174 | 0.09022948 | 11.8984588 | 4.71E-31   |
| Universal stress protein B                                                                      | 1456.99736 | 1.07107714 | 0.17674783 | 6.05991678 | 9.42E-09   |
| UPF0098 protein ybhB                                                                            | 1476.25184 | 1.06882006 | 0.13607523 | 7.8546259  | 4.70E-14   |
| Di/tripeptide permease DtpB                                                                     | 603.66592  | 1.06681371 | 0.10149511 | 10.5109864 | 1.85E-24   |
| Sensory histidine kinase QseC                                                                   | 262.888166 | 1.06540915 | 0.15455671 | 6.89332179 | 4.92E-11   |
| Iron-sulfur cluster assembly ATPase protein SufC                                                | 3408.4347  | 1.06297334 | 0.12787365 | 8.31268498 | 1.24E-15   |
| D-galactonate transporter                                                                       | 476.514838 | 1.06293845 | 0.13697405 | 7.76014491 | 9.65E-14   |
| Glucose dehydrogenase%2C PQQ-dependent                                                          | 33003.5315 | 1.0626786  | 0.12362209 | 8.59618705 | 1.18E-16   |
| FIG00638140: hypothetical protein                                                               | 801.99003  | 1.05724713 | 0.19380281 | 5.45527257 | 2.82E-07   |
| Inner membrane ABC transporter permease protein YcJQ                                            | 18.7401854 | 1.05667499 | 0.37263221 | 2.8357049  | 0.01170581 |
| Para-aminobenzoate synthase%2C amidotransferase component                                       | 357.397537 | 1.05401722 | 0.13136366 | 8.02365927 | 1.25E-14   |
| ID=gene:EBG00000313239                                                                          | 20.0026609 | 1.05090934 | 0.367999   | 2.85573965 | 0.0110579  |
| Sulfate-binding protein Sbp                                                                     | 583.233604 | 1.04886737 | 0.11736988 | 8.93642707 | 6.49E-18   |
| PhnB protein%3B putative DNA binding 3-demethylubiquinone-9 3-methyltransferase domain protein  | 312.243371 | 1.04416734 | 0.15312724 | 6.81895226 | 8.03E-11   |
| Acetate permease ActP (cation/acetate symporter)                                                | 340.982437 | 1.04014866 | 0.1261642  | 8.2444044  | 2.16E-15   |
| Putative membrane protein                                                                       | 657.461967 | 1.03736923 | 0.15962715 | 6.49870151 | 6.43E-10   |
| Osmotically inducible lipoprotein E precursor                                                   | 2113.25436 | 1.03657373 | 0.17113363 | 6.05710112 | 9.54E-09   |
| Inner membrane protein YqjF                                                                     | 116.82166  | 1.03287873 | 0.22594171 | 4.57143891 | 2.24E-05   |
| Putative inner membrane protein                                                                 | 760.145979 | 1.03072186 | 0.10710317 | 9.62363544 | 1.17E-20   |
| FIG00639422: hypothetical protein                                                               | 1848.4743  | 1.02837794 | 0.16426505 | 6.26047922 | 2.81E-09   |
| Ferrichrome-iron receptor                                                                       | 1627.18633 | 1.02464094 | 0.18324387 | 5.59167921 | 1.35E-07   |
| Histidine ABC transporter%2C permease protein HisQ (TC 3.A.1.3.1)                               | 3434.09414 | 1.02110208 | 0.17094009 | 5.97344993 | 1.55E-08   |
| Sulfate adenylyltransferase subunit 2                                                           | 10388.2195 | 1.01939649 | 0.10338766 | 9.8599431  | 1.27E-21   |
| Cysteine desulfurase                                                                            | 5037.46928 | 1.01816726 | 0.13004909 | 7.82909926 | 5.71E-14   |
| FIG004405: Putative cytoplasmic protein                                                         | 476.462751 | 1.01485906 | 0.12716687 | 7.98053006 | 1.76E-14   |
| FIG00638524: hypothetical protein                                                               | 975.309396 | 1.01441858 | 0.11846578 | 8.56296743 | 1.57E-16   |
| Transcription regulator [contains diacylglycerol kinase catalytic domain]                       | 1297.28936 | 1.0074396  | 0.17114232 | 5.88656045 | 2.07E-08   |
| FIG010773: NAD-dependent epimerase/dehydratase                                                  | 28.4267675 | 1.00653883 | 0.33669159 | 2.98949795 | 5.5754143  |
| Cytoplasmic trehalase                                                                           | 3875.87493 | 1.00453577 | 0.13569906 | 7.40267279 | 1.35E-12   |
| PTS system%2C chitobiose-specific IIC component                                                 | 155.867513 | 1.00288474 | 0.16788412 | 5.97367244 | 1.55E-08   |
| FIG00638451: hypothetical protein                                                               | 983.113107 | 1.00287689 | 0.18120815 | 5.5343919  | 1.82E-07   |
| Putrescine importer                                                                             | 1196.40544 | 0.99873013 | 0.17419158 | 5.73351567 | 6.16E-08   |
| N-acetylneuraminic acid outer membrane channel protein NanC                                     | 30.8141619 | 0.99800444 | 0.32936741 | 3.03006433 | 0.00672131 |
| FIG00637885: hypothetical protein                                                               | 156.098523 | 0.99746344 | 0.16618181 | 6.00224197 | 1.31E-08   |
| Succinyl-CoA ligase [ADP-forming] alpha chain                                                   | 23602.6953 | 0.99682101 | 0.10252104 | 9.72308683 | 4.62E-21   |
| FIG1045396: hypothetical protein                                                                | 77.3410312 | 0.99547975 | 0.26723871 | 3.72505824 | 0.00068229 |
| metal-dependent phosphohydrolase                                                                | 447.775581 | 0.98917572 | 0.13001857 | 7.60795742 | 3.04E-13   |
| FMN reductase                                                                                   | 220.245208 | 0.98409122 | 0.26401067 | 3.72746761 | 0.0006768  |
| Mobile element protein                                                                          | 88.3373059 | 0.98306464 | 0.19591211 | 5.01788603 | 2.72E-06   |
| FIG00639237: hypothetical protein                                                               | 3304.50931 | 0.97359658 | 0.20952738 | 4.64663185 | 1.60E-05   |
| 2-oxoglutarate dehydrogenase E1 component                                                       | 47226.9238 | 0.97280551 | 0.10084843 | 6.84621331 | 9.50E-21   |
| Putative PerM family permease                                                                   | 427.557408 | 0.97059939 | 0.13128821 | 7.39289055 | 1.45E-12   |
| Alcohol dehydrogenase                                                                           | 6716.73252 | 0.96904436 | 0.15325867 | 6.32293347 | 1.93E-09   |
| Succinyl-CoA ligase [ADP-forming] beta chain                                                    | 22335.0589 | 0.96865657 | 0.10015668 | 9.67141241 | 7.52E-21   |
| hypothetical protein                                                                            | 35.1943941 | 0.96828663 | 0.28947949 | 3.34492306 | 0.0025203  |
| Alcohol dehydrogenase                                                                           | 2074.22017 | 0.96481256 | 0.14473262 | 6.66617211 | 2.23E-10   |
| Aconitate hydratase 2                                                                           | 64741.2459 | 0.96223806 | 0.09747336 | 9.87180544 | 1.13E-21   |
| UPF0028 protein YchK                                                                            | 1119.06345 | 0.96192981 | 0.08952328 | 10.745024  | 1.68E-25   |
| FIG00639826: hypothetical protein                                                               | 1479.55302 | 0.96035869 | 0.11714508 | 8.19802824 | 3.12E-15   |
| Putative transport protein                                                                      | 326.465187 | 0.95926248 | 0.12750636 | 7.52325176 | 5.68E-13   |
| Transketolase                                                                                   | 10991.5657 | 0.95897802 | 0.1405417  | 6.82344094 | 7.82E-11   |
| Putative cytoplasmic protein %2Cprobably associated with Glutathione-regulated potassium-efflux | 340.431781 | 0.95833633 | 0.15540888 | 6.16654807 | 5.00E-09   |
| Serine transporter                                                                              | 155.031187 | 0.95457074 | 0.1514481  | 6.30295618 | 2.17E-09   |
| 3-isopropylmalate dehydratase small subunit                                                     | 2117.65023 | 0.95346884 | 0.12059525 | 7.90635465 | 3.15E-14   |
| Gamma-glutamyltranspeptidase                                                                    | 2454.83478 | 0.95322769 | 0.14998241 | 6.35559652 | 1.59E-09   |
| Hnr protein                                                                                     | 1834.52069 | 0.9520369  | 0.0991388  | 9.60307085 | 1.43E-20   |
| Putative transport protein                                                                      | 100.87933  | 0.95001982 | 0.1828409  | 5.19588233 | 1.12E-06   |
| FIG1045311: hypothetical protein                                                                | 141.999043 | 0.94414988 | 0.22835873 | 4.13450309 | 0.00014166 |
| Luciferase-like monooxygenase                                                                   | 376.039466 | 0.94325713 | 0.15773651 | 5.97995417 | 1.50E-08   |
| PTS system%2C maltose and glucose-specific IIC component                                        | 36.147355  | 0.94120694 | 0.32815212 | 2.86820314 | 0.010678   |
| Putative lipase                                                                                 | 193.586995 | 0.93856334 | 0.15290078 | 6.13838156 | 5.94E-09   |
| probable lipoprotein                                                                            | 481.379167 | 0.93289045 | 0.21576646 | 4.32361196 | 6.50E-05   |
| Transposase                                                                                     | 16.3610077 | 0.93190411 | 0.38681535 | 2.40917046 | 0.03559677 |
| Inner membrane protein YqjE                                                                     | 7184.00992 | 0.9318878  | 0.13450853 | 6.92809461 | 3.87E-11   |
| FIG00638099: hypothetical protein                                                               | 94.3748779 | 0.92616551 | 0.2673746  | 3.46392483 | 0.00169145 |
| Glutamate transport ATP-binding protein                                                         | 9262.68558 | 0.92601559 | 0.1222372  | 7.57556252 | 3.86E-13   |
| Alkanesulfonate monooxygenase                                                                   | 714.020372 | 0.92560711 | 0.25365994 | 3.64900779 | 0.00089731 |
| Heme-regulated cyclic AMP phosphodiesterase                                                     | 2505.2806  | 0.92500236 | 0.12279759 | 7.53274019 | 5.31E-13   |
| Cytoplasmic protein YaiB                                                                        | 567.002172 | 0.92079048 | 0.38097369 | 2.41693985 | 0.03497767 |
| Regulator of sigma D                                                                            | 1549.34401 | 0.91668866 | 0.10356931 | 8.85096845 | 1.33E-17   |
| Branched-chain amino acid aminotransferase                                                      | 20796.5863 | 0.91405814 | 0.10260867 | 8.90819631 | 8.21E-18   |
| Glutamate synthase [NADPH] large chain                                                          | 37140.7567 | 0.91369176 | 0.11327722 | 8.06597969 | 9.00E-15   |
| High-affinity choline uptake protein BetT                                                       | 3903.55408 | 0.91267433 | 0.08524039 | 10.707064  | 2.51E-25   |
| L-cystine uptake protein TcyP                                                                   | 4590.47579 | 0.9121549  | 0.10277255 | 8.87547245 | 1.08E-17   |
| ID=gene:EBG00000313298                                                                          | 36.7180009 | 0.90553701 | 0.36882624 | 2.45518601 | 0.03185941 |
| Pyruvate oxidase [ubiquinone%2C cytochrome]                                                     | 11746.3283 | 0.90071029 | 0.15000206 | 6.00465296 | 1.30E-08   |
| Threonine dehydratase biosynthetic                                                              | 11265.8702 | 0.89862528 | 0.12125821 | 7.41084048 | 1.27E-12   |
| CsiR%2C transcriptional repressor of CsiD                                                       | 445.14875  | 0.8973634  | 0.18406733 | 4.875191   | 5.44E-06   |
| FIG00643552: hypothetical protein                                                               | 43.2855252 | 0.8950487  | 0.29972473 | 2.98623572 | 0.00760068 |
| Putative transport system permease protein                                                      | 27.3115831 | 0.89371415 | 0.34143135 | 2.61755153 | 0.02105488 |
| Probable tonB-dependent receptor yncD precursor                                                 | 743.602826 | 0.88972124 | 0.11027748 | 8.06802324 | 8.87E-15   |

|                                                                                                                                                               |            |            |            |            |            |
|---------------------------------------------------------------------------------------------------------------------------------------------------------------|------------|------------|------------|------------|------------|
| Putative lipase                                                                                                                                               | 1181.87359 | 0.886532   | 0.14564558 | 6.08691307 | 8.07E-09   |
| UPF0379 protein yjfy precursor                                                                                                                                | 42.0941742 | 0.88522754 | 0.33249844 | 2.66235098 | 0.01876088 |
| Transcriptional regulator%2C GntR family                                                                                                                      | 32.5568601 | 0.88467684 | 0.28531276 | 3.10072652 | 0.00544605 |
| FIG00896318: hypothetical protein                                                                                                                             | 261.759587 | 0.87842417 | 0.14899467 | 5.89567508 | 2.44E-08   |
| Inner membrane protein YqJK                                                                                                                                   | 5651.91378 | 0.8733717  | 0.12090712 | 7.22349298 | 4.93E-12   |
| Propionate catabolism operon regulatory protein PrpR                                                                                                          | 73.4675429 | 0.87330099 | 0.21635354 | 4.03645346 | 0.000212   |
| FIG00638412: hypothetical protein                                                                                                                             | 55.5446152 | 0.86843943 | 0.25194371 | 3.44695822 | 0.0017941  |
| Glutathione-regulated potassium-efflux system protein KefB                                                                                                    | 1314.91023 | 0.86725953 | 0.09857202 | 8.79823212 | 2.10E-17   |
| adherence and invasion outer membrane protein (Inv%2CEnhances Peyer's patches colonization)                                                                   | 260.791346 | 0.86478046 | 0.13647486 | 6.33655497 | 1.78E-09   |
| Glutathione S-transferase%2C omega                                                                                                                            | 781.583231 | 0.8639398  | 0.1299076  | 6.65041759 | 2.45E-10   |
| Ribosomal RNA large subunit methyltransferase A                                                                                                               | 282.937344 | 0.86083567 | 0.16520698 | 5.21064943 | 1.04E-06   |
| Putative transport protein                                                                                                                                    | 369.476461 | 0.86070556 | 0.11596976 | 7.42181014 | 1.18E-12   |
| hypothetical protein Yjdl                                                                                                                                     | 87.1206476 | 0.85686359 | 0.23895084 | 3.58594095 | 0.00111979 |
| Putative iron compound permease protein of ABC transporter family                                                                                             | 1392.80373 | 0.85442492 | 0.11083309 | 7.70911427 | 1.42E-13   |
| FIG00638997: hypothetical protein                                                                                                                             | 495.579937 | 0.85347929 | 0.1276713  | 6.68497371 | 1.97E-10   |
| type 1 fimbriae regulatory protein FimE                                                                                                                       | 69.333196  | 0.85287137 | 0.22752623 | 3.74845292 | 0.00062679 |
| adherence and invasion outer membrane protein (Inv%2CEnhances Peyer's patches colonization)                                                                   | 415.619984 | 0.84910349 | 0.10805077 | 7.85837548 | 4.58E-14   |
| FIG00638941: hypothetical protein                                                                                                                             | 3443.03809 | 0.84712209 | 0.13640732 | 6.21023927 | 3.83E-09   |
| FIG00639659: hypothetical protein                                                                                                                             | 27.7641841 | 0.84383127 | 0.31374825 | 2.68951706 | 0.01750409 |
| Glutamate Aspartate transport system permease protein GltX (TC 3.A.1.3.4)                                                                                     | 129.4046   | 0.84144664 | 0.16941091 | 4.96689756 | 3.50E-06   |
| PTS system%2C sorbose-specific IIC component                                                                                                                  | 30.702995  | 0.8408966  | 0.35276637 | 2.38372097 | 0.03776557 |
| hypothetical protein                                                                                                                                          | 45.8183889 | 0.83767256 | 0.30977163 | 2.70416169 | 0.01685559 |
| Hypothetical protein                                                                                                                                          | 2995.51158 | 0.83476251 | 0.10895062 | 7.66184237 | 2.04E-13   |
| 3-oxoacyl-[acyl-carrier protein] reductase                                                                                                                    | 61.3611064 | 0.83224214 | 0.25883106 | 3.21538746 | 0.00381847 |
| Rhodanese-related sulfurtransferases                                                                                                                          | 1037.56288 | 0.83210588 | 0.09829169 | 8.46567867 | 3.55E-16   |
| Taurine transport ATP-binding protein TauB                                                                                                                    | 644.137384 | 0.82990703 | 0.15395074 | 5.39073111 | 4.00E-07   |
| Glutamate synthase [NADPH] small chain                                                                                                                        | 13325.7724 | 0.82923628 | 0.08354057 | 9.92615041 | 6.65E-22   |
| hypothetical protein                                                                                                                                          | 244.231086 | 0.82394148 | 0.12717662 | 6.47871796 | 7.29E-10   |
| FIG00637864: hypothetical protein                                                                                                                             | 502.177101 | 0.82076007 | 0.10444529 | 7.85827785 | 4.58E-14   |
| Glutamate Aspartate periplasmic binding protein precursor GltI (TC 3.A.1.3.4)                                                                                 | 11405.7139 | 0.81655048 | 0.0987493  | 8.26892386 | 1.77E-15   |
| ID=gene:EBG00000313232                                                                                                                                        | 30.8539421 | 0.81611839 | 0.2976799  | 2.74159727 | 0.01519219 |
| ID=gene:EBG00000313246                                                                                                                                        | 30.8539421 | 0.81611839 | 0.2976799  | 2.74159727 | 0.01519219 |
| ID=gene:EBG00000313247                                                                                                                                        | 30.8539421 | 0.81611839 | 0.2976799  | 2.74159727 | 0.01519219 |
| Dipeptide transport system permease protein DppB (TC 3.A.1.5.2)                                                                                               | 642.67993  | 0.81578838 | 0.1611059  | 5.06367795 | 2.17E-06   |
| Soluble pyridine nucleotide transhydrogenase                                                                                                                  | 3813.21798 | 0.81541217 | 0.10689254 | 7.62833575 | 2.63E-13   |
| FIG00638228: hypothetical protein                                                                                                                             | 93.1890339 | 0.81502774 | 0.27890439 | 2.92224659 | 0.00916727 |
| Putative cytochrome oxidase subunit                                                                                                                           | 707.674735 | 0.81289253 | 0.17629856 | 4.61088588 | 1.88E-05   |
| Glutamate transport membrane-spanning protein                                                                                                                 | 5569.97827 | 0.8126757  | 0.11904395 | 6.82668599 | 7.67E-11   |
| Fumarate hydratase class II                                                                                                                                   | 1435.95899 | 0.81151365 | 0.11244668 | 7.21687485 | 5.17E-12   |
| Galactosamine-6-phosphate isomerase (galactosamine-6-phosphate deaminase)                                                                                     | 28.9942327 | 0.8047719  | 0.34716559 | 2.31812118 | 0.04394402 |
| Nucleoside diphosphate kinase                                                                                                                                 | 273.413814 | 0.80470633 | 0.15022284 | 5.35675081 | 4.80E-07   |
| PTS system%2C galactosamine-specific IIC component                                                                                                            | 59.5920063 | 0.80416133 | 0.26681936 | 3.01387921 | 0.00704137 |
| Protein ycel precursor                                                                                                                                        | 2121.53262 | 0.80277389 | 0.14095875 | 5.69509785 | 7.63E-08   |
| Uncharacterized membrane protein YqJD                                                                                                                         | 3658.42758 | 0.80224366 | 0.14384916 | 5.57697854 | 1.46E-07   |
| Integrase                                                                                                                                                     | 486.639274 | 0.8021123  | 0.12047602 | 6.65785864 | 2.34E-10   |
| Permease of the drug/metabolite transporter (DMT) superfamily                                                                                                 | 419.759368 | 0.80191981 | 0.14812904 | 5.41365711 | 3.54E-07   |
| Sulfite reductase [NADPH] hemoprotein beta-component                                                                                                          | 7021.28886 | 0.80039687 | 0.14368216 | 5.57060721 | 1.51E-07   |
| Iso citrate dehydrogenase [NADP]                                                                                                                              | 108220.546 | 0.7997833  | 0.08625804 | 9.27198517 | 3.19E-19   |
| Transcriptional regulator%2C TetR family                                                                                                                      | 180.659235 | 0.79861663 | 0.17344404 | 4.60446278 | 1.93E-05   |
| Putative inner membrane protein                                                                                                                               | 269.040779 | 0.79831682 | 0.15224353 | 5.2436829  | 8.74E-07   |
| 3-isopropylmalate dehydratase large subunit                                                                                                                   | 4383.97036 | 0.79641453 | 0.08573924 | 9.28879844 | 2.73E-19   |
| 2-isopropylmalate synthase                                                                                                                                    | 3091.27408 | 0.79584082 | 0.15830135 | 5.02737854 | 2.60E-06   |
| Dipeptide transport system permease protein DppC (TC 3.A.1.5.2)                                                                                               | 749.895687 | 0.79281085 | 0.13987262 | 5.66809163 | 8.87E-08   |
| Thioredoxin 2                                                                                                                                                 | 421.152745 | 0.79262079 | 0.14091848 | 5.624676   | 1.12E-07   |
| FIG00638146: hypothetical protein                                                                                                                             | 45.2349271 | 0.79119689 | 0.27611821 | 2.86542815 | 0.01076027 |
| FIG00639292: hypothetical protein                                                                                                                             | 342.297551 | 0.79078164 | 0.17157573 | 4.60893644 | 1.89E-05   |
| General secretion pathway protein C                                                                                                                           | 118.077392 | 0.78846448 | 0.17039391 | 4.62730426 | 1.74E-05   |
| Rtn protein                                                                                                                                                   | 273.213586 | 0.78752469 | 0.1248686  | 6.30682745 | 2.13E-09   |
| D-galactonate transporter                                                                                                                                     | 89.6025368 | 0.78603145 | 0.20467716 | 3.84034763 | 0.00044746 |
| ID=gene:EBG00000313233                                                                                                                                        | 38.0841824 | 0.78582731 | 0.29661952 | 2.64927709 | 0.0194111  |
| Allantoinase                                                                                                                                                  | 974.480729 | 0.78230555 | 0.11180977 | 6.9967548  | 2.42E-11   |
| Oxidoreductase                                                                                                                                                | 669.261066 | 0.78113805 | 0.13346373 | 5.85281154 | 3.13E-08   |
| Maltose O-acetyltransferase                                                                                                                                   | 2459.01779 | 0.78022214 | 0.13393065 | 5.82556832 | 3.63E-08   |
| 3-isopropylmalate dehydrogenase                                                                                                                               | 3635.21584 | 0.77992328 | 0.11080058 | 7.03898203 | 1.81E-11   |
| Putative GTP-binding protein YdgA                                                                                                                             | 12445.8944 | 0.77988835 | 0.09336153 | 8.35342337 | 8.89E-16   |
| HTH-type transcriptional regulator mlrA                                                                                                                       | 765.885489 | 0.77850768 | 0.17829269 | 4.36645875 | 5.43E-05   |
| COG1399 protein%2C clustered with ribosomal protein L32p                                                                                                      | 6118.07203 | 0.77678807 | 0.13276681 | 5.85077024 | 3.16E-08   |
| Isopentenyl-diphosphate delta-isomerase                                                                                                                       | 526.733892 | 0.77652878 | 0.18447866 | 4.2093149  | 0.00010483 |
| FIG00637968: hypothetical protein                                                                                                                             | 214.881827 | 0.77608357 | 0.13898091 | 5.58410213 | 1.41E-07   |
| FIG00639587: hypothetical protein                                                                                                                             | 41.235708  | 0.7741973  | 0.31355477 | 2.46909752 | 0.03079454 |
| chaperone FimC                                                                                                                                                | 236.781544 | 0.77403647 | 0.19717605 | 3.92561105 | 0.00032457 |
| Methylglyoxal reductase%2C acetol producing                                                                                                                   | 3480.99838 | 0.77392514 | 0.13770372 | 5.6202194  | 1.15E-07   |
| putative exported protein                                                                                                                                     | 52.8902365 | 0.77301773 | 0.22891035 | 3.37694521 | 0.00226346 |
| NgrB                                                                                                                                                          | 97.5675486 | 0.77073663 | 0.25787584 | 2.98878963 | 0.00755032 |
| Inner membrane component of tripartite multidrug resistance system                                                                                            | 84.6792704 | 0.76935813 | 0.20323062 | 3.78564083 | 0.00054659 |
| FIG005119: putative inner membrane protein                                                                                                                    | 383.980361 | 0.76821564 | 0.12107839 | 6.34477898 | 1.70E-09   |
| Putative inner membrane protein                                                                                                                               | 231.693429 | 0.76633536 | 0.16116709 | 4.75491203 | 9.67E-06   |
| Putative oxidoreductase                                                                                                                                       | 799.270774 | 0.76623098 | 0.23376208 | 3.27782414 | 0.00313038 |
| expressed protein                                                                                                                                             | 57.4641677 | 0.76566109 | 0.28346836 | 2.70104602 | 0.0169878  |
| LysR family transcriptional regulator YnfL                                                                                                                    | 231.679853 | 0.76305069 | 0.133435   | 5.71851985 | 6.69E-08   |
| hypothetical protein                                                                                                                                          | 102.997789 | 0.76217825 | 0.21338344 | 3.57187157 | 0.00117323 |
| Ribonuclease E                                                                                                                                                | 19609.4793 | 0.75986631 | 0.11289175 | 6.73092884 | 1.45E-10   |
| Permease of the drug/metabolite transporter (DMT) superfamily                                                                                                 | 50.9192055 | 0.75864587 | 0.2765402  | 2.74334755 | 0.01513529 |
| FIG00638229: hypothetical protein                                                                                                                             | 243.665559 | 0.75612213 | 0.13925628 | 5.42971642 | 3.24E-07   |
| N-3-oxohexanoyl-L-homoserine lactone quorum-sensing transcriptional activator @ N-3-oxooctanoyl-L-homoserine lactone quorum-sensing transcriptional activator | 1513.51985 | 0.75155442 | 0.10172584 | 7.3880386  | 1.50E-12   |
| Taurine transport system permease protein TauC                                                                                                                | 499.762195 | 0.7511196  | 0.14405785 | 5.2140135  | 1.02E-06   |
| Putative arylsulfatase regulatory protein                                                                                                                     | 244.909149 | 0.74709887 | 0.17489567 | 4.27168314 | 8.09E-05   |
| Tyrosine-specific transport protein                                                                                                                           | 210.050041 | 0.74523006 | 0.15977407 | 4.66427413 | 1.47E-05   |
| Aminomethyltransferase (glycine cleavage system T protein)                                                                                                    | 2236.434   | 0.74480022 | 0.09256109 | 8.04657966 | 1.05E-14   |
| Permease of the drug/metabolite transporter (DMT) superfamily                                                                                                 | 1189.44667 | 0.73904717 | 0.14323325 | 5.15974594 | 1.35E-06   |
| UPF0410 protein YeaQ                                                                                                                                          | 517.843308 | 0.73508252 | 0.2226401  | 3.30166267 | 0.00289626 |
| Acetyl-CoA:acetoacetyl-CoA transferase%2C alpha subunit                                                                                                       | 391.802177 | 0.73437702 | 0.15440371 | 4.7562136  | 9.62E-06   |
| Electron transport complex protein RnfB                                                                                                                       | 471.074249 | 0.7296783  | 0.13805234 | 5.28551907 | 7.06E-07   |
| 4-aminobutyraldehyde dehydrogenase                                                                                                                            | 783.107295 | 0.72856569 | 0.12058884 | 6.04173388 | 1.04E-08   |
| Phosphoadenylyl-sulfate reductase [thioredoxin]                                                                                                               | 2468.8612  | 0.72791049 | 0.13823361 | 5.26579957 | 7.81E-07   |
| Mobile element protein                                                                                                                                        | 323.273868 | 0.72753177 | 0.15577337 | 4.67045035 | 1.43E-05   |
| Z5092 protein                                                                                                                                                 | 36.3195792 | 0.72702669 | 0.27638574 | 2.63047828 | 0.0203423  |
| L%2CD-transpeptidase Erfk                                                                                                                                     | 1058.30064 | 0.72692206 | 0.08586618 | 8.46575545 | 3.55E-16   |
| COG1242: Predicted Fe-S oxidoreductase                                                                                                                        | 257.063342 | 0.72568151 | 0.14494884 | 5.00646641 | 2.88E-06   |
| Uncharacterized membrane lipoprotein clustered with tellurite resistance proteins TehA/TehB                                                                   | 1037.9224  | 0.72418529 | 0.11635641 | 6.22385384 | 3.53E-09   |
| Alkanesulfonates ABC transporter ATP-binding protein / Sulfonate ABC transporter%2C ATP-binding subunit SsuB                                                  | 416.4877   | 0.724094   | 0.18713095 | 3.86945083 | 0.0004016  |
| Rod shape-determining protein MreD                                                                                                                            | 404.671848 | 0.7234022  | 0.12434047 | 5.81791434 | 3.79E-08   |
| Ribonuclease P protein component                                                                                                                              | 1264.94081 | 0.71832344 | 0.11905534 | 6.03352547 | 1.09E-08   |
| FIG00638351: hypothetical protein                                                                                                                             | 197.956486 | 0.71666988 | 0.1909678  | 3.75283095 | 0.00061732 |
| Phosphate starvation-inducible protein PsiF                                                                                                                   | 751.249489 | 0.7147518  | 0.1285744  | 5.55905211 | 1.60E-07   |
| orf%3B Unknown function                                                                                                                                       | 29.3152169 | 0.71326683 | 0.30249354 | 2.35795723 | 0.04006265 |
| FIG094199: Fumarylacetoacetate hydrolase                                                                                                                      | 4239.01864 | 0.71082097 | 0.1218477  | 5.83368415 | 3.47E-08   |

|                                                                                                |            |            |            |            |            |
|------------------------------------------------------------------------------------------------|------------|------------|------------|------------|------------|
| High-affinity branched-chain amino acid transport system permease protein LivH (TC 3.A.1.4.1)  | 227.10355  | 0.70813835 | 0.1543168  | 4.5888611  | 2.07E-05   |
| Betaine aldehyde dehydrogenase                                                                 | 24154.1064 | 0.7074038  | 0.08339619 | 8.48244773 | 3.10E-16   |
| Sodium-Choline Symporter                                                                       | 56.9712508 | 0.70579628 | 0.24010493 | 2.93953268 | 0.00872191 |
| Lipoprotein releasing system transmembrane protein LolC                                        | 1286.0605  | 0.70578526 | 0.07939373 | 8.88968564 | 9.60E-18   |
| Endonuclease VIII                                                                              | 2541.06218 | 0.70563553 | 0.12815537 | 5.50609408 | 2.13E-07   |
| Haemolysin expression modulating protein                                                       | 4019.30016 | 0.70540557 | 0.10767097 | 6.55149251 | 4.56E-10   |
| D-xylose transport ATP-binding protein XylG                                                    | 131.606275 | 0.70165068 | 0.18535952 | 3.78535019 | 0.00054682 |
| 3-hydroxydecanoyl-[acyl-carrier-protein] dehydratase                                           | 1551.91547 | 0.70145144 | 0.16987408 | 4.12924343 | 0.00014445 |
| Malate synthase G                                                                              | 3282.30725 | 0.70096001 | 0.08501595 | 8.24504149 | 2.16E-15   |
| Spermidine Putrescine ABC transporter permease component PotB (TC 3.A.1.11.1)                  | 704.442477 | 0.70015367 | 0.13343548 | 5.24713255 | 8.61E-07   |
| FIG00638765: hypothetical protein                                                              | 60.9609672 | 0.69888494 | 0.26195603 | 2.66798568 | 0.01852287 |
| Electron transport complex protein RnfA                                                        | 293.377057 | 0.69840311 | 0.14876812 | 4.69457502 | 1.28E-05   |
| Serine transporter                                                                             | 206.949672 | 0.69663536 | 0.1442563  | 4.82915047 | 6.78E-06   |
| Putative transport protein/putative regulator hypothetical protein                             | 535.306758 | 0.69460699 | 0.10278127 | 6.75810861 | 1.21E-10   |
| Maltodextrin phosphorylase                                                                     | 78.7269097 | 0.69411257 | 0.19828903 | 3.50050921 | 0.00149757 |
| Phage tail fiber assembly protein                                                              | 2207.42894 | 0.69343877 | 0.11855345 | 5.84916577 | 3.18E-08   |
| Proposed peptidoglycan lipid II flippase MurJ                                                  | 32.9501609 | 0.68913302 | 0.28275461 | 2.4372123  | 0.03331278 |
| Predicted sugar ABC transport system%2C periplasmic binding protein YphF precursor             | 779.194793 | 0.6860763  | 0.12525082 | 5.47761912 | 2.50E-07   |
| FIG00637898: hypothetical protein                                                              | 68.5310173 | 0.68543397 | 0.22545053 | 3.04028552 | 0.00653055 |
| FIG002337: predicted inner membrane protein                                                    | 46.8769696 | 0.68536757 | 0.28756985 | 2.38330815 | 0.03777276 |
| Electron transport complex protein RnfC                                                        | 3196.90294 | 0.68508635 | 0.09838798 | 6.96311048 | 3.04E-11   |
| Putative molybdenum transport ATP-binding protein modF                                         | 1572.51387 | 0.68356539 | 0.1189339  | 5.74743966 | 5.71E-08   |
| Soluble aldose sugar dehydrogenase%2C CPQQ-dependent                                           | 10686.1545 | 0.6812973  | 0.07868724 | 8.65829494 | 6.95E-17   |
| Dihydrodipicolinate succinyltransferase component (E2) of 2-oxoglutarate dehydrogenase complex | 438.762761 | 0.68069675 | 0.12209068 | 5.57533757 | 1.47E-07   |
| Xylose kinase                                                                                  | 32472.193  | 0.67863994 | 0.08740003 | 7.76475643 | 9.33E-14   |
| Putative membrane protein                                                                      | 766.714649 | 0.67545108 | 0.13964454 | 4.83693166 | 6.55E-06   |
| Glycine dehydrogenase [decarboxylating] (glycine cleavage system P protein)                    | 234.774746 | 0.67511922 | 0.13850419 | 4.87435943 | 5.46E-06   |
| FIG00639135: hypothetical protein                                                              | 6469.85647 | 0.66991025 | 0.10130692 | 6.61267977 | 3.10E-10   |
| Lactam utilization protein LamB                                                                | 36.8537912 | 0.66980436 | 0.27257594 | 2.45731283 | 0.03168655 |
| Low-affinity inorganic phosphate transporter                                                   | 6317.83185 | 0.66901009 | 0.09948425 | 6.72478372 | 1.51E-10   |
| putative permease of ferrichrome ABC transporter                                               | 3206.72521 | 0.66777461 | 0.12024138 | 5.5361744  | 1.65E-07   |
| Transcriptional regulatory protein YcIT                                                        | 1080.28576 | 0.66776418 | 0.12720802 | 5.24938722 | 8.51E-07   |
| D-3-phosphoglycerate dehydrogenase                                                             | 2771.3394  | 0.66502589 | 0.10149687 | 6.55218145 | 4.5E-10    |
| ID= gene:EBG00000313285                                                                        | 99.8427276 | 0.66469406 | 0.20094811 | 3.30778965 | 0.00284633 |
| ID= gene:EBG00000313287                                                                        | 76.317398  | 0.66414671 | 0.19495165 | 3.40672534 | 0.00205721 |
| ABC-type polar amino acid transport system%2CATPase component                                  | 76.317398  | 0.66414671 | 0.19495165 | 3.40672534 | 0.00205721 |
| LysR family transcriptional regulator YcZ                                                      | 420.535413 | 0.66296559 | 0.12353203 | 5.36675041 | 4.56E-07   |
| hypothetical protein                                                                           | 349.482073 | 0.66035554 | 0.11686383 | 5.65064113 | 9.76E-08   |
| 4-alpha-gluconotransferase (amylomaltase)                                                      | 48.6002504 | 0.65897502 | 0.257389   | 2.56022997 | 0.02444454 |
| Glutamate-aspartate carrier protein                                                            | 1534.62934 | 0.65822696 | 0.10862279 | 6.05975017 | 9.42E-09   |
| Branched-chain amino acid transport ATP-binding protein LivG (TC 3.A.1.4.1)                    | 4662.5715  | 0.6580681  | 0.09033157 | 7.28502904 | 3.15E-12   |
| Mobile element protein                                                                         | 308.759369 | 0.65805227 | 0.14958311 | 4.39924172 | 4.72E-05   |
| tRNA dihydrouridine synthase B                                                                 | 172.550232 | 0.65679519 | 0.13560342 | 4.84350015 | 6.35E-06   |
| Putative purine permease ybbY                                                                  | 3258.21306 | 0.6557862  | 0.14182859 | 4.62379404 | 1.77E-05   |
| Cellulose synthase catalytic subunit [UDP-forming]                                             | 212.423574 | 0.6552354  | 0.14875208 | 4.40488229 | 4.62E-05   |
| Putative oxidoreductase                                                                        | 5063.04335 | 0.65500617 | 0.09555655 | 6.85522562 | 6.36E-11   |
| Hypothetical Zinc-finger containing protein                                                    | 39.8524039 | 0.65449576 | 0.27052362 | 2.4193664  | 0.03481096 |
| FIG00637950: hypothetical protein                                                              | 288.195776 | 0.65363306 | 0.16894003 | 3.86902422 | 0.00040199 |
| Evolved beta-D-galactosidase%2C alpha subunit                                                  | 70.0278    | 0.65207485 | 0.23705634 | 2.75071678 | 0.01484586 |
| biofilm regulator BsrR                                                                         | 111.139063 | 0.65190792 | 0.18715491 | 3.48325316 | 0.00158669 |
| FIG006303: protein yraQ                                                                        | 5844.44077 | 0.65162159 | 0.15538102 | 4.19370137 | 0.00011154 |
| Outer-membrane protein yhbX precursor                                                          | 482.678892 | 0.65037883 | 0.13696584 | 4.74847491 | 9.97E-06   |
| Glucose-1-phosphate thymidyltransferase                                                        | 71.2175407 | 0.64996548 | 0.16550452 | 3.9271765  | 0.00032272 |
| Sulfate and thiosulfate import ATP-binding protein CysA                                        | 76.4212502 | 0.64951415 | 0.21917815 | 2.96340741 | 0.00812775 |
| Thiol:disulfide interchange protein DsbC precursor                                             | 13770.9014 | 0.64779402 | 0.10697978 | 6.05529404 | 9.64E-09   |
| Electron transport complex protein RnfD                                                        | 652.103512 | 0.64731836 | 0.13548249 | 4.77787452 | 8.67E-06   |
| Putative regulator                                                                             | 374.604537 | 0.64573986 | 0.14910312 | 4.3308273  | 6.30E-05   |
| Intergenic-region protein                                                                      | 86.868497  | 0.64534724 | 0.20605351 | 3.13194003 | 0.00495216 |
| FIG00638001: hypothetical protein                                                              | 59.1791576 | 0.64499142 | 0.24092735 | 2.67711992 | 0.01807175 |
| NADH pyrophosphatase                                                                           | 65.3117575 | 0.64375942 | 0.22355011 | 2.8797097  | 0.01034121 |
| Polymyxin resistance protein ArnC%2C glycosyl transferase                                      | 1220.19628 | 0.64214231 | 0.08946484 | 7.1775943  | 6.84E-12   |
| FIG00643895: hypothetical protein                                                              | 2075.06535 | 0.64160611 | 0.12540785 | 5.11615575 | 1.69E-06   |
| Uncharacterized protein ygiV                                                                   | 97.2996976 | 0.63922418 | 0.17760441 | 3.59914579 | 0.0010682  |
| FIG00638983: hypothetical protein                                                              | 182.070604 | 0.63920826 | 0.18517056 | 3.45199726 | 0.00176328 |
| Transporter                                                                                    | 162.457711 | 0.63905873 | 0.16809097 | 3.80186243 | 0.00051659 |
| FIG00640398: hypothetical protein                                                              | 77.327231  | 0.63822392 | 0.2107921  | 3.02774111 | 0.00676285 |
| Gamma-D-Glutamyl-meso-Diaminopimelate Amidase                                                  | 84.8234341 | 0.63601667 | 0.24185443 | 2.62974991 | 0.02036539 |
| Putative transport protein                                                                     | 120.939177 | 0.63412697 | 0.16550706 | 3.83141945 | 0.00046259 |
| FoM Alternative dihydrofolate reductase 1                                                      | 75.7281716 | 0.6328793  | 0.24395081 | 2.5942906  | 0.02236249 |
| Enoyl-CoA hydratase                                                                            | 489.169243 | 0.63175981 | 0.10254859 | 6.16059022 | 5.18E-09   |
| Xanthine permease                                                                              | 674.273722 | 0.63138877 | 0.1104213  | 5.71799795 | 6.70E-08   |
| 4-hydroxybenzoyl-CoA thioesterase family active site                                           | 941.949525 | 0.63137344 | 0.14957056 | 4.22124133 | 9.99E-05   |
| Putative inner membrane protein                                                                | 168.969497 | 0.63048155 | 0.15100208 | 4.17531715 | 0.00011992 |
| Phage shock protein D                                                                          | 155.060961 | 0.62973377 | 0.1561312  | 4.03336277 | 0.00021445 |
| putative integral membrane protein                                                             | 413.931387 | 0.6285401  | 0.17235552 | 3.64676507 | 0.00090387 |
| Xylose ABC transporter%2C permease protein XylH                                                | 674.873484 | 0.62846999 | 0.09519118 | 6.60218718 | 3.32E-10   |
| Trans-aconitate 2-methyltransferase                                                            | 225.90315  | 0.62842411 | 0.16022069 | 3.92224082 | 0.00032836 |
| Long-chain-fatty-acid--CoA ligase                                                              | 476.329247 | 0.62773368 | 0.14257927 | 4.40269947 | 4.66E-05   |
| FIG018329: 1-acyl-sn-glycerol-3-phosphate acyltransferase                                      | 67.8293344 | 0.62545628 | 0.21567472 | 2.89999812 | 0.00975895 |
| Ethanolamine permease                                                                          | 2451.1907  | 0.62531938 | 0.12925982 | 4.83769336 | 6.53E-06   |
| FIG00510289: hypothetical protein                                                              | 98.1464896 | 0.62348684 | 0.20246908 | 3.07941755 | 0.00058027 |
| Transporter%2C putative                                                                        | 171.52264  | 0.6221403  | 0.15757987 | 3.94809505 | 0.00029935 |
| Hypothetical protein GlcG in glycolate utilization operon                                      | 410.981311 | 0.62107586 | 0.18747228 | 3.31289431 | 0.00279847 |
| Mobile element protein                                                                         | 330.733387 | 0.62104356 | 0.11675939 | 5.31900306 | 5.90E-07   |
| Uncharacterized GST-like protein yibF                                                          | 69.683755  | 0.62026801 | 0.20658008 | 3.00255471 | 0.00727932 |
| FIG00638742: hypothetical protein                                                              | 224.228639 | 0.61995761 | 0.15639088 | 3.9641546  | 0.00028148 |
| Phosphate:acyl-ACP acyltransferase PlsX                                                        | 427.451223 | 0.61952205 | 0.17004758 | 3.64322778 | 0.00091573 |
| Sulfate adenylyltransferase subunit 1                                                          | 2732.26971 | 0.61662181 | 0.10794917 | 5.71214959 | 6.92E-08   |
| Catalase                                                                                       | 17411.5435 | 0.6147731  | 0.10967162 | 5.60558041 | 1.25E-07   |
| L-serine dehydratase 1                                                                         | 1840.70745 | 0.6143797  | 0.14602761 | 4.20728463 | 0.00010568 |
| UDP-4-amino-4-deoxy-L-arabinose--oxoglutarate aminotransferase                                 | 2935.26397 | 0.61384293 | 0.14501307 | 4.23301792 | 9.50E-05   |
| Hypothetical transcriptional regulator yidL                                                    | 3890.74207 | 0.61348535 | 0.10955063 | 5.60001682 | 1.29E-07   |
| Macrolide-specific efflux protein MacA                                                         | 290.650077 | 0.61295765 | 0.14425356 | 4.24916823 | 8.90E-05   |
| hypothetical protein                                                                           | 1070.96914 | 0.61246161 | 0.10017146 | 6.11413302 | 6.86E-09   |
| FIG005274: hypothetical protein                                                                | 127.734585 | 0.61238131 | 0.1798741  | 3.40449961 | 0.00207131 |
| FIG01069516: hypothetical protein                                                              | 7867.41759 | 0.61207764 | 0.06746633 | 9.0723427  | 1.93E-18   |
| hypothetical protein                                                                           | 1112.29418 | 0.61136722 | 0.08926727 | 6.84872781 | 6.64E-11   |
| Ribosomal large subunit pseudouridine synthase C                                               | 728.2644   | 0.60947039 | 0.10170426 | 5.99257492 | 1.39E-08   |
| Mobile element protein                                                                         | 339.46995  | 0.60739695 | 0.14509676 | 4.1861509  | 0.00011473 |
| Oxidoreductase%2C aldo/keto reductase family                                                   | 43.2987537 | 0.60620274 | 0.24396664 | 2.48477714 | 0.02959902 |
| Branched-chain amino acid transport system permease protein LivM (TC 3.A.1.4.1)                | 5129.24488 | 0.60495492 | 0.1000036  | 6.04933126 | 9.97E-09   |
| A/G-specific adenine glycosylase                                                               | 286.520528 | 0.60229412 | 0.13805215 | 4.3628016  | 5.51E-05   |
| Manganese transport protein MntH                                                               | 519.798054 | 0.59989468 | 0.10785795 | 5.56189588 | 1.58E-07   |
| Cytochrome c-type heme lyase subunit nrF%2CNitrite reductase complex assembly                  | 15972.3118 | 0.59837598 | 0.09671832 | 6.18679048 | 4.43E-09   |
| DNA-binding protein Fis                                                                        | 94.181349  | 0.59810345 | 0.20903105 | 2.86131386 | 0.01087715 |
| Rod shape-determining protein MreC                                                             | 874.593917 | 0.5971327  | 0.13758018 | 4.34025248 | 6.07E-05   |
|                                                                                                | 1387.97778 | 0.59659915 | 0.1033052  | 5.77511267 | 4.86E-08   |

|                                                                                                   |            |            |            |            |            |
|---------------------------------------------------------------------------------------------------|------------|------------|------------|------------|------------|
| Membrane protein Yci%2C linked to IspA                                                            | 684.436813 | 0.59648962 | 0.11951313 | 4.99099668 | 3.11E-06   |
| Putative membrane protein                                                                         | 196.569734 | 0.59630448 | 0.1432863  | 4.16162944 | 0.0001269  |
| Permeases of the major facilitator superfamily                                                    | 895.121926 | 0.59444495 | 0.13862309 | 4.2882102  | 7.56E-05   |
| Periplasmic Murein Peptide-Binding Protein MppA                                                   | 2205.56006 | 0.59338344 | 0.08266163 | 1.7846298  | 6.81E-12   |
| Flavoprotein wrbA                                                                                 | 15409.6952 | 0.59191087 | 0.11281322 | 5.24682207 | 8.61E-07   |
| N-acetylmuramoyl-L-alanine amidase                                                                | 7612.11492 | 0.58983063 | 0.08240123 | 7.15803222 | 7.79E-12   |
| type 1 fimbriae anchoring protein FimD                                                            | 368.8127   | 0.58923431 | 0.20299648 | 2.90268231 | 0.00968668 |
| Inner membrane protein CreD                                                                       | 318.880916 | 0.5855283  | 0.14854539 | 3.94174673 | 0.00030664 |
| Aerobic glycerol-3-phosphate dehydrogenase                                                        | 2195.88558 | 0.58481761 | 0.20304906 | 2.8801788  | 0.01033151 |
| Biofilm PGA synthesis N-glycosyltransferase PgaC                                                  | 515.807151 | 0.58467785 | 0.15442398 | 3.78618572 | 0.0005458  |
| Protein involved in stability of MscS mechanosensitive channel                                    | 7633.96886 | 0.58418295 | 0.12592317 | 4.63920133 | 1.65E-05   |
| FIG001957: putative hydrolase                                                                     | 514.525574 | 0.58093885 | 0.11367114 | 5.1106979  | 1.73E-06   |
| type 1 fimbriae major subunit FimA                                                                | 495.131814 | 0.57793661 | 0.20734645 | 2.78729926 | 0.0133821  |
| Tricarboxylate transport protein TctB                                                             | 52.7968734 | 0.57772161 | 0.2273491  | 2.54112121 | 0.02566343 |
| ID=gene:EBG00000313228                                                                            | 64.6788675 | 0.5776521  | 0.22259717 | 2.59505584 | 0.02232719 |
| ID=gene:EBG00000313293                                                                            | 64.6788675 | 0.5776521  | 0.22259717 | 2.59505584 | 0.02232719 |
| Uncharacterized protein Yid5                                                                      | 184.706206 | 0.57302647 | 0.17192617 | 3.33297986 | 0.00261916 |
| FIG00637936: hypothetical protein                                                                 | 187.25661  | 0.57288305 | 0.19971666 | 2.86847904 | 0.01067453 |
| Nitrogen regulation protein NtrB                                                                  | 1930.2044  | 0.572613   | 0.10834716 | 5.28498378 | 7.07E-07   |
| FIG00639456: hypothetical protein                                                                 | 143.419202 | 0.57235612 | 0.15618393 | 3.66462866 | 0.00084917 |
| Gifsy-2 prophage protein                                                                          | 82.105829  | 0.57228487 | 0.23494291 | 2.4358465  | 0.03342292 |
| Pantothenate:Na+ symporter (TC 2.A.21.1.1)                                                        | 400.979193 | 0.57169888 | 0.17299238 | 3.30476331 | 0.00287161 |
| Calcium/proton antiporter                                                                         | 2004.93528 | 0.57145426 | 0.09502787 | 6.01354381 | 1.23E-08   |
| Paraquat-inducible protein A                                                                      | 881.265093 | 0.56881139 | 0.09729107 | 5.84649131 | 3.23E-08   |
| Intracellular septation protein IspA                                                              | 690.986624 | 0.56674836 | 0.09623817 | 5.88901867 | 2.53E-08   |
| HTH-type transcriptional regulator BetI                                                           | 6824.26443 | 0.5652352  | 0.09662137 | 5.88000171 | 3.17E-08   |
| Methylated-DNA--protein-cysteine methyltransferase                                                | 614.075156 | 0.56520798 | 0.10852353 | 5.20816087 | 1.05E-06   |
| CDP-diacylglycerol--glycerol-3-phosphate 3-phosphatidyltransferase                                | 48.842146  | 0.56455939 | 0.24738006 | 2.28215403 | 0.04779125 |
| Protease II                                                                                       | 1429.26837 | 0.56387521 | 0.08568655 | 6.58067329 | 3.79E-10   |
| Alkylated DNA repair protein AlkB                                                                 | 305.158698 | 0.56267788 | 0.13384991 | 4.20379718 | 0.00010714 |
| Outer membrane pore protein E precursor                                                           | 96.0298642 | 0.56228968 | 0.17885286 | 3.14386753 | 0.00477484 |
| Endoglucanase precursor                                                                           | 4271.27535 | 0.56213499 | 0.13015172 | 4.31907447 | 6.62E-05   |
| Decarboxylase family protein                                                                      | 14786.1962 | 0.56122537 | 0.1137167  | 4.93529415 | 4.09E-06   |
| Lipopolysaccharide heptosyltransferase III                                                        | 2523.48736 | 0.56080559 | 0.09803449 | 5.72049301 | 6.63E-08   |
| Cytochrome c-type heme lyase subunit nrfG%2Cnrite reductase complex assembly                      | 62.5211457 | 0.55927536 | 0.21194078 | 2.63882846 | 0.01996887 |
| Chaperone protein HscB                                                                            | 1615.27385 | 0.55846953 | 0.08263905 | 6.75793718 | 1.21E-10   |
| Carbamoyl-phosphate synthase small chain                                                          | 8396.75452 | 0.55718439 | 0.20144802 | 2.76589652 | 0.01420966 |
| Integral membrane protein TerC                                                                    | 362.522576 | 0.55616966 | 0.17138944 | 3.24514896 | 0.00347322 |
| Ethanolamine ammonia-lyase light chain                                                            | 487.94634  | 0.5555906  | 0.12636748 | 4.39662631 | 4.77E-05   |
| FIG00638170: hypothetical protein                                                                 | 78.0847178 | 0.55361609 | 0.21872396 | 2.53111769 | 0.0263683  |
| Periplasmic protein related to spheroblast formation                                              | 1230.89486 | 0.55292013 | 0.16525191 | 3.34592272 | 0.00251449 |
| Ribulosamine/erythrosamine 3-kinase potentially involved in protein deglycation                   | 2651.19163 | 0.55271003 | 0.11644886 | 4.74637578 | 1.01E-05   |
| Inner membrane metabolite transport protein YhjE                                                  | 1715.9981  | 0.55092817 | 0.13314336 | 4.13785694 | 0.00013984 |
| UDP-galactose:(galactosyl) LPS alpha1%2C2-galactosyltransferase WaaW                              | 1470.32315 | 0.55047759 | 0.15697063 | 3.50688261 | 0.00146917 |
| Ribosomal protein S12p Asp88 (E. coli) methylthiotransferase                                      | 875.074571 | 0.54969482 | 0.08842991 | 6.21616378 | 3.69E-09   |
| ADA regulatory protein / Methylated-DNA--protein-cysteine methyltransferase                       | 1150.10696 | 0.54899813 | 0.11910099 | 4.60951793 | 1.89E-05   |
| Menaquinone-specific isochromatase synthase                                                       | 1240.55402 | 0.54753834 | 0.09672116 | 5.66115894 | 9.23E-08   |
| Preprotein translocase subunit SecG (TC 3.A.5.1.1)                                                | 3377.45598 | 0.54703717 | 0.12243201 | 4.46808936 | 3.54E-05   |
| TsaC protein (YrdC domain) required for threonylcarbamoyladenine t(6)A37 modification in tRNA     | 2415.72894 | 0.54660005 | 0.10651065 | 5.13188144 | 1.56E-06   |
| Carbon-nitrogen hydrolase                                                                         | 1116.52351 | 0.54583881 | 0.15395823 | 3.54536938 | 0.00128988 |
| Putative inner membrane protein                                                                   | 106.77639  | 0.54564625 | 0.23975913 | 2.27581012 | 0.04842734 |
| Polymyxin resistance protein PmrG%3B Ais protein                                                  | 162.166809 | 0.54471808 | 0.17539189 | 3.10571981 | 0.00536132 |
| Multidrug resistance protein A                                                                    | 267.601088 | 0.54459008 | 0.19812811 | 2.74867653 | 0.0149307  |
| FIG00638032: hypothetical protein                                                                 | 124.268494 | 0.54400327 | 0.21090115 | 2.57942296 | 0.02324756 |
| Proline/sodium symporter PutP (TC 2.A.21.2.1) @ Propionate/sodium symporter                       | 2281.23271 | 0.54376397 | 0.14425504 | 3.76946266 | 0.0005802  |
| Inner membrane protein YgiK                                                                       | 602.528919 | 0.54323296 | 0.12275034 | 4.42551088 | 4.25E-05   |
| Putative membrane protein                                                                         | 529.74236  | 0.54302711 | 0.13563094 | 4.00371125 | 0.00024158 |
| YfdE protein                                                                                      | 100.361574 | 0.54289814 | 0.22692731 | 2.39238787 | 0.03693698 |
| Dipeptide transport ATP-binding protein DppD (TC 3.A.1.5.2)                                       | 1767.12337 | 0.54275899 | 0.12886958 | 4.21169201 | 0.00010391 |
| Transcriptional regulator%2C AraC family                                                          | 211.110084 | 0.54250559 | 0.141264   | 3.84036696 | 0.00044746 |
| hypothetical protein                                                                              | 768.152793 | 0.5420157  | 0.14247914 | 3.80417569 | 0.00051304 |
| Mobile element protein                                                                            | 409.103199 | 0.54141625 | 0.14493504 | 3.7355788  | 0.00065633 |
| CDP-diacylglycerol pyrophosphatase                                                                | 138.294107 | 0.54112482 | 0.15244662 | 3.54961178 | 0.00127193 |
| Alcohol dehydrogenase                                                                             | 1881.30561 | 0.54040174 | 0.11646602 | 4.63999479 | 1.64E-05   |
| Phenylalanyl-tRNA synthetase beta chain                                                           | 21441.0194 | 0.540293   | 0.07273491 | 7.42824909 | 1.13E-12   |
| FIG00639775: hypothetical protein                                                                 | 231.706252 | 0.53997979 | 0.15969645 | 3.8140253  | 0.00222996 |
| Putative inner membrane protein                                                                   | 202.71477  | 0.53995503 | 0.16454144 | 3.28157476 | 0.00309491 |
| probable lipoprotein                                                                              | 4590.58936 | 0.53984    | 0.10255582 | 5.26386485 | 7.89E-07   |
| Pyruvate-flavodoxin oxidoreductase                                                                | 3183.80319 | 0.53923692 | 0.09580842 | 6.62828338 | 1.10E-07   |
| L-Proline/Glycine betaine transporter ProP                                                        | 34398.0136 | 0.53922905 | 0.09383643 | 5.74647871 | 5.73E-08   |
| Tetraacyldisaccharide 4'-kinase                                                                   | 1283.49227 | 0.53846615 | 0.11718571 | 4.59498122 | 2.01E-05   |
| ATP-dependent protease La                                                                         | 2843.04998 | 0.53802743 | 0.06838311 | 7.8678408  | 4.27E-14   |
| Glycine cleavage system H protein                                                                 | 1287.57476 | 0.53791228 | 0.13639518 | 3.94377776 | 0.0003043  |
| Cellulose synthase%2C putative                                                                    | 2730.16904 | 0.53658651 | 0.10427626 | 5.14581649 | 1.45E-06   |
| Mobile element protein                                                                            | 109.609236 | 0.5351957  | 0.17622867 | 3.03693895 | 0.00659673 |
| Mobile element protein                                                                            | 305.135327 | 0.53495729 | 0.13080628 | 4.08969116 | 0.00017015 |
| Threonine dehydratase%2C catabolic                                                                | 137.713357 | 0.53422928 | 0.15701346 | 3.40244258 | 0.00208437 |
| AmpG permease                                                                                     | 732.618765 | 0.53362957 | 0.0904649  | 5.89874719 | 2.40E-08   |
| Putative amino acid permease                                                                      | 323.750295 | 0.53055956 | 0.15677403 | 3.38423109 | 0.00221195 |
| Ribonucleotide reductase of class Ib (aerobic)%2CbctA subunit                                     | 8378.6323  | 0.53023829 | 0.11759191 | 4.50913931 | 2.97E-05   |
| FIG002082: Protein SirB2                                                                          | 228.725161 | 0.52973018 | 0.1633466  | 3.24298261 | 0.00349319 |
| Putative inner membrane protein                                                                   | 114.602517 | 0.52918526 | 0.19259132 | 2.74771084 | 0.01496685 |
| ID=gene:EBG00000313275                                                                            | 55.998954  | 0.52829649 | 0.22268951 | 2.37234562 | 0.03864494 |
| ID=gene:EBG00000313277                                                                            | 55.998954  | 0.52829649 | 0.22268951 | 2.37234562 | 0.03864494 |
| ID=gene:EBG00000313278                                                                            | 55.998954  | 0.52829649 | 0.22268951 | 2.37234562 | 0.03864494 |
| ID=gene:EBG00000313281                                                                            | 55.998954  | 0.52829649 | 0.22268951 | 2.37234562 | 0.03864494 |
| ID=gene:EBG00000313282                                                                            | 55.998954  | 0.52829649 | 0.22268951 | 2.37234562 | 0.03864494 |
| ID=gene:EBG00000313305                                                                            | 55.998954  | 0.52829649 | 0.22268951 | 2.37234562 | 0.03864494 |
| Cys regulon transcriptional activator CysB                                                        | 5142.57405 | 0.52802129 | 0.08053063 | 6.55677563 | 4.42E-10   |
| Potassium uptake protein TrkH                                                                     | 1596.10722 | 0.52689911 | 0.08800544 | 5.98379095 | 1.46E-08   |
| FIG00637861: hypothetical protein                                                                 | 445.197269 | 0.52538741 | 0.11224545 | 4.68070102 | 1.37E-05   |
| Phosphatidylglycerophosphatase B                                                                  | 753.499941 | 0.52509881 | 0.1156732  | 4.53950283 | 2.59E-05   |
| Putative deoxyribonuclease YcH                                                                    | 1254.50986 | 0.52449012 | 0.09173738 | 5.71729984 | 6.72E-08   |
| Invasin                                                                                           | 463.861231 | 0.52421167 | 0.11875084 | 4.41438276 | 4.45E-05   |
| FIG00638364: hypothetical protein                                                                 | 162.819221 | 0.52359589 | 0.14510532 | 3.60838527 | 0.00103527 |
| COG2879%2C Hypothetical small protein yjiX                                                        | 296.371175 | 0.52347773 | 0.17722816 | 2.95369386 | 0.00835496 |
| Multidrug transporter MdtD                                                                        | 235.862141 | 0.52318977 | 0.15031264 | 3.48067722 | 0.00159986 |
| Cytochrome c-type protein NrfB precursor                                                          | 91.2706396 | 0.5226926  | 0.20541587 | 2.54455799 | 0.02542474 |
| Ribosomal large subunit pseudouridine synthase B                                                  | 1373.49064 | 0.52255705 | 0.09103094 | 5.74043362 | 5.93E-08   |
| High-affinity leucine-specific transport system%2Cperiplasmic binding protein LivK (TC 3.A.1.4.1) | 460.435161 | 0.52095647 | 0.10533998 | 4.94547701 | 3.89E-06   |
| Mg(2+) transport ATPase%2C P-type                                                                 | 6120.75734 | 0.52008895 | 0.11814346 | 4.40218131 | 4.67E-05   |
| Mobile element protein                                                                            | 141.621711 | 0.51973936 | 0.17228288 | 3.01677901 | 0.00698242 |
| FIG01219827: hypothetical protein                                                                 | 246.954162 | 0.51965015 | 0.19743153 | 2.63205246 | 0.02028921 |
| lipid A biosynthesis lauroyl acyltransferase                                                      | 3774.64369 | 0.51946072 | 0.13750235 | 3.77783151 | 0.00056232 |
| Mobile exported protein                                                                           | 139.441558 | 0.51842374 | 0.15612032 | 3.32066802 | 0.00272867 |
| FIG00895798: hypothetical protein                                                                 | 7603.64904 | 0.51773466 | 0.12489531 | 4.14534903 | 0.00013569 |
| Peptide transport system permease protein SapC                                                    | 919.9021   | 0.51755161 | 0.12253677 | 4.22364347 | 9.89E-05   |

|                                                                                                                                              |            |            |            |            |            |
|----------------------------------------------------------------------------------------------------------------------------------------------|------------|------------|------------|------------|------------|
| Maltose operon periplasmic protein MalM                                                                                                      | 276.72118  | 0.5174287  | 0.12270516 | 4.21684562 | 0.00010165 |
| Paraquat-inducible protein A                                                                                                                 | 588.515896 | 0.517082   | 0.09942455 | 5.20074781 | 1.09E-06   |
| Inner membrane protein translocase component YidC%2C long form                                                                               | 5732.02815 | 0.51671323 | 0.10483302 | 4.92891695 | 4.21E-06   |
| SAM-dependent methyltransferase                                                                                                              | 8625.96923 | 0.51545467 | 0.10114997 | 5.09594491 | 1.86E-06   |
| Ferric enterobactin uptake protein FepE                                                                                                      | 8626.06808 | 0.51445664 | 0.06754249 | 7.61678548 | 2.85E-13   |
| Putative protease ydgD                                                                                                                       | 2517.90637 | 0.51432345 | 0.07799952 | 6.59393114 | 3.51E-10   |
| Potassium channel protein                                                                                                                    | 1238.14701 | 0.5139176  | 0.11643619 | 4.41372753 | 4.46E-05   |
| Lipid A export ATP-binding/permease protein MsbA                                                                                             | 2586.20428 | 0.51379505 | 0.0841482  | 6.10583538 | 7.19E-09   |
| Alkaline phosphatase                                                                                                                         | 2289.4492  | 0.51275664 | 0.10447567 | 4.90790482 | 4.65E-06   |
| 3-oxoacyl-[ACP] synthase                                                                                                                     | 3614.12742 | 0.51195231 | 0.09011194 | 5.68129297 | 8.23E-08   |
| Putative HTH-type transcriptional regulator ycgE                                                                                             | 1787.62487 | 0.51178897 | 0.08707339 | 5.87767343 | 2.70E-08   |
| Acyl-CoA dehydrogenase                                                                                                                       | 635.964218 | 0.51105475 | 0.11103136 | 4.60279653 | 1.94E-05   |
| Translation elongation factor P Lys34:lysine transferase                                                                                     | 586.148133 | 0.51104942 | 0.11338288 | 4.50728911 | 2.99E-05   |
| 6-phospho-beta-glucosidase                                                                                                                   | 408.688589 | 0.51074569 | 0.12539863 | 4.0729765  | 0.00018254 |
| FIG00638813: hypothetical protein                                                                                                            | 369.080547 | 0.51036656 | 0.15689414 | 3.25293585 | 0.00338367 |
| IgaA: a membrane protein that prevents overactivation of the Rcs regulatory system                                                           | 2006.66484 | 0.5102431  | 0.11474709 | 4.44667588 | 3.89E-05   |
| Xylose isomerase                                                                                                                             | 412.573908 | 0.50837895 | 0.13318996 | 3.81694659 | 0.00048833 |
| Endo-1%2C4-beta-xylanase A precursor                                                                                                         | 213.827773 | 0.50791048 | 0.17344714 | 2.92833005 | 0.00901716 |
| Lipoprotein releasing system transmembrane protein LolE                                                                                      | 1944.41725 | 0.50480185 | 0.11498303 | 4.39022937 | 4.89E-05   |
| FIG004453: protein YceG like                                                                                                                 | 1026.72282 | 0.50284684 | 0.11556902 | 4.35105224 | 5.79E-05   |
| Acyl-CoA dehydrogenase                                                                                                                       | 2909.28181 | 0.50171815 | 0.12314717 | 4.07413447 | 0.00018178 |
| Invasin                                                                                                                                      | 77.6915494 | 0.50139058 | 0.19835358 | 2.52776173 | 0.02659559 |
| 2-methylcitrate dehydratase                                                                                                                  | 152.456117 | 0.50109743 | 0.15948438 | 3.14198433 | 0.00480275 |
| Putative inner membrane protein                                                                                                              | 508.796476 | 0.49815767 | 0.1085005  | 4.59129399 | 2.05E-05   |
| Ethanolamine utilization polyhedral-body-like protein EutK                                                                                   | 365.431294 | 0.49757271 | 0.14199045 | 3.50426876 | 0.00148062 |
| cysteine synthase B                                                                                                                          | 3654.98936 | 0.49530618 | 0.11429845 | 4.33344598 | 6.25E-05   |
| Fumarate hydratase class %2C aerobic                                                                                                         | 992.240011 | 0.49511084 | 0.13760441 | 3.59807379 | 0.00107186 |
| Inner membrane protein YfeZ                                                                                                                  | 126.996348 | 0.49485542 | 0.15531411 | 3.18615891 | 0.00417694 |
| Putative outer membrane protein                                                                                                              | 651.23666  | 0.49468427 | 0.15807939 | 3.12934076 | 0.00498436 |
| Hybrid sensory histidine kinase in two-component regulatory system with EvgA                                                                 | 1562.1744  | 0.49464847 | 0.15808201 | 3.12906235 | 0.00498589 |
| Adenylylsulfate kinase                                                                                                                       | 2515.731   | 0.4942433  | 0.13615284 | 3.63006241 | 0.0009589  |
| Na <sup>+</sup> /H <sup>+</sup> antiporter NhaB                                                                                              | 2575.11234 | 0.49318163 | 0.09991921 | 4.91715899 | 4.45E-06   |
| Phosphate transport system permease protein PstC (TC 3.A.1.7.1)                                                                              | 951.112197 | 0.49045934 | 0.11090976 | 4.42214755 | 4.31E-05   |
| Inner membrane protein YfiN                                                                                                                  | 1133.89017 | 0.48971007 | 0.1153431  | 4.2456817  | 9.02E-05   |
| 3-deoxy-D-manno-octulosonic-acid transferase                                                                                                 | 1007.98742 | 0.48859636 | 0.09714245 | 5.02968935 | 2.57E-06   |
| FIG00638953: hypothetical protein                                                                                                            | 851.466849 | 0.48822748 | 0.16052522 | 3.04143787 | 0.00651034 |
| Leucine-responsive regulatory protein%2C regulator for leucine (or lrp) regulon and high-affinity branched-chain amino acid transport system | 19166.9838 | 0.48677864 | 0.11406341 | 4.26761425 | 8.23E-05   |
| FIG003145: Surface protein                                                                                                                   | 397.073211 | 0.4866947  | 0.13860592 | 3.51135577 | 0.00144764 |
| Xanthosine permease                                                                                                                          | 92.3862438 | 0.48665787 | 0.19424263 | 2.50541223 | 0.0280687  |
| Allophanate hydrolase 2 subunit 2                                                                                                            | 12046.816  | 0.48606528 | 0.11663117 | 4.16754166 | 0.00012387 |
| Undecaprenyl-phosphate N-acetylglucosaminyl 1-phosphate transferase                                                                          | 2130.47444 | 0.48604282 | 0.0987763  | 4.92064184 | 4.38E-06   |
| ADP compounds hydrolase NudE                                                                                                                 | 1168.95521 | 0.48468019 | 0.13809458 | 3.50976971 | 0.0014553  |
| Sialic acid utilization regulator%2C RpiR family                                                                                             | 321.460478 | 0.48303262 | 0.12543861 | 3.85074897 | 0.00043087 |
| HTH-type transcriptional regulator prxS                                                                                                      | 452.860493 | 0.48290438 | 0.12138663 | 3.97823383 | 0.00026705 |
| Protein SseB                                                                                                                                 | 2097.62039 | 0.48284496 | 0.11968292 | 4.03436807 | 0.00021371 |
| Paraquat-inducible protein B                                                                                                                 | 1815.14538 | 0.48253988 | 0.11260032 | 4.28542171 | 7.64E-05   |
| Phage shock protein B                                                                                                                        | 881.995    | 0.48243964 | 0.14429316 | 3.34346845 | 0.00253191 |
| Inner membrane protein YihY%2C formerly thought to be RNase BN                                                                               | 1666.09033 | 0.48053283 | 0.08174607 | 5.87835962 | 2.69E-08   |
| Inner membrane thiol:disulfide oxidoreductase%2C DsbB-like                                                                                   | 361.161413 | 0.47935144 | 0.13517978 | 3.54602915 | 0.00128755 |
| Transglycosylase%2C Slt family                                                                                                               | 107.42815  | 0.4793395  | 0.16578718 | 2.89129404 | 0.01001153 |
| transport%3B Transport of small molecules: Cations                                                                                           | 2878.28943 | 0.47768337 | 0.08669403 | 5.49288451 | 2.29E-07   |
| Ribulose-5-phosphate 4-epimerase and related epimerases and aldolases                                                                        | 133.63633  | 0.4765253  | 0.18145415 | 2.62614722 | 0.00056151 |
| Sensor histidine protein kinase UhpB%2Cglucose-6-phosphate specific                                                                          | 426.871697 | 0.47636077 | 0.13222981 | 3.60252176 | 0.00105517 |
| Shikimate 5-dehydrogenase I alpha                                                                                                            | 2900.59098 | 0.47628058 | 0.10607311 | 4.49011595 | 3.24E-05   |
| Protease II                                                                                                                                  | 240.570438 | 0.47531806 | 0.15203358 | 3.12640178 | 0.00502519 |
| DNA primase                                                                                                                                  | 4019.94743 | 0.47482115 | 0.09935042 | 4.77925684 | 8.62E-06   |
| Carbamoyl-phosphate synthase large chain                                                                                                     | 43361.5612 | 0.47263355 | 0.16729836 | 2.82509372 | 0.01206795 |
| Alpha-ketoglutarate-dependent taurine dioxygenase                                                                                            | 730.101446 | 0.47202012 | 0.14191221 | 3.32614166 | 0.00268081 |
| Cysteine desulfurase                                                                                                                         | 15936.398  | 0.47198444 | 0.06262293 | 7.53692724 | 5.15E-13   |
| Phosphate transport system permease protein PstA (TC 3.A.1.7.1)                                                                              | 882.055143 | 0.47087786 | 0.11088347 | 4.24660084 | 8.99E-05   |
| Nicotinamide-nucleotide adenylyltransferase%2C NadR family                                                                                   | 185.727982 | 0.47004097 | 0.17107855 | 2.74751545 | 0.01496788 |
| FIG00638035: hypothetical protein                                                                                                            | 1375.57139 | 0.46989156 | 0.11325792 | 4.14886284 | 0.00013374 |
| AidA-1 adhesin-like protein                                                                                                                  | 347.868463 | 0.46887057 | 0.1420183  | 3.30148006 | 0.0028963  |
| FIG006163: hypothetical protein                                                                                                              | 71.6377145 | 0.46591572 | 0.19462294 | 2.39394044 | 0.03683254 |
| Putative heat shock protein YegD                                                                                                             | 371.521165 | 0.46532071 | 0.13285472 | 3.50247775 | 0.00148858 |
| Outer membrane porin protein NmpC precursor                                                                                                  | 138.034699 | 0.46254301 | 0.16535595 | 2.79725647 | 0.01302506 |
| Cystine ABC transporter%2C periplasmic cystine-binding protein FliY                                                                          | 10285.8307 | 0.46203628 | 0.13227536 | 3.49298814 | 0.0015362  |
| ATP-dependent RNA helicase RhlE                                                                                                              | 2396.03327 | 0.4619712  | 0.11806804 | 3.91275422 | 0.00034073 |
| LysR family transcriptional regulator YhjC                                                                                                   | 276.387438 | 0.46116376 | 0.13909041 | 3.31556825 | 0.00277361 |
| Glutamate synthase [NADPH] small chain                                                                                                       | 478.429814 | 0.4603632  | 0.1114606  | 4.13027742 | 0.00014393 |
| Arylesterase precursor                                                                                                                       | 772.941877 | 0.46031714 | 0.10270812 | 4.48179869 | 3.34E-05   |
| Glucuronide transport facilitator UidC                                                                                                       | 162.072301 | 0.45993733 | 0.16942325 | 2.71472379 | 0.01636143 |
| PTS system%2C galactosamine-specific IID component                                                                                           | 131.859332 | 0.45963057 | 0.1826936  | 2.51585476 | 0.02735046 |
| Cnu protein                                                                                                                                  | 145.372996 | 0.45831344 | 0.166835   | 2.74710602 | 0.01497868 |
| Putative NAGC-like transcriptional regulator                                                                                                 | 232.234188 | 0.45810398 | 0.13544212 | 3.38228605 | 0.00222469 |
| Multiple antibiotic resistance protein MarC                                                                                                  | 230.268556 | 0.45772809 | 0.14497796 | 3.15722545 | 0.00458082 |
| Transcription repressor of multidrug efflux pump acrAB operon%2C TetR (AcrR) family                                                          | 149.326216 | 0.45759433 | 0.15001462 | 3.05033154 | 0.00634284 |
| Maltoporin (maltose/maltodextrin high-affinity receptor)%2C phage lambda receptor protein                                                    | 121.213148 | 0.45713854 | 0.17861996 | 2.55928034 | 0.02448103 |
| D-alanyl-D-alanine carboxypeptidase                                                                                                          | 7516.45473 | 0.45712505 | 0.09208875 | 4.96396202 | 3.55E-06   |
| Galactitol-D-phosphate 5-dehydrogenase                                                                                                       | 137.73793  | 0.45674539 | 0.17607716 | 2.59400702 | 0.02236249 |
| Multiple antibiotic resistance protein MarR                                                                                                  | 84.2102434 | 0.45581845 | 0.19816642 | 2.30018009 | 0.04587213 |
| Putative lipase in cluster with Phosphatidate cytidyltransferase                                                                             | 231.037611 | 0.45544546 | 0.12882954 | 3.53525641 | 0.00133194 |
| Oligopeptide transport system permease protein OppB (TC 3.A.1.5.1)                                                                           | 3298.5274  | 0.45538981 | 0.10144369 | 4.48908952 | 3.24E-05   |
| Methyl-directed repair DNA adenine methylase                                                                                                 | 1201.75604 | 0.45524165 | 0.1338539  | 3.40103386 | 0.00209222 |
| Acyl-CoA thioesterase YciA%2C involved in membrane biogenesis                                                                                | 201.994363 | 0.45474003 | 0.16120105 | 2.82094962 | 0.01219496 |
| Electron transport complex protein RnfG                                                                                                      | 411.851673 | 0.45363093 | 0.12692201 | 3.57409202 | 0.00116516 |
| type 1 fimbriae adaptor subunit FimG                                                                                                         | 109.494259 | 0.45334894 | 0.19913977 | 2.27653649 | 0.04836359 |
| Phosphoenolpyruvate synthase                                                                                                                 | 28496.6618 | 0.45297761 | 0.12971784 | 3.49202243 | 0.00154072 |
| ABC transport system%2C permease component YbhR                                                                                              | 5537.31707 | 0.45244947 | 0.1233878  | 3.66689    | 0.00084292 |
| Putative TEGT family carrier/transport protein                                                                                               | 5004.32113 | 0.4517851  | 0.08175771 | 5.52590188 | 1.91E-07   |
| Uncharacterized protein ImpJ/VasE                                                                                                            | 98.635274  | 0.44941623 | 0.1789796  | 2.51099129 | 0.02767627 |
| Cation transport protein chnC                                                                                                                | 3578.74871 | 0.448728   | 0.11288402 | 3.9751243  | 0.00027012 |
| Allantoin permease                                                                                                                           | 144.612173 | 0.44820898 | 0.18318926 | 2.44669903 | 0.03254169 |
| Dipeptide transport system permease protein DppC (TC 3.A.1.5.2)                                                                              | 1982.67332 | 0.44814211 | 0.11397695 | 3.93186629 | 0.0003318  |
| Large-conductance mechanosensitive channel                                                                                                   | 6984.19408 | 0.44647495 | 0.09901705 | 4.50907165 | 2.97E-05   |
| tRNA (guanine46-N7)-methyltransferase                                                                                                        | 825.635652 | 0.44625189 | 0.09556273 | 4.66972753 | 1.44E-05   |
| 4-phosphopantetheinyl transferase                                                                                                            | 234.508701 | 0.4459405  | 0.13646405 | 3.26782413 | 0.00323492 |
| Preprotein translocase subunit SecE (TC 3.A.5.1.1)                                                                                           | 3615.82799 | 0.4446527  | 0.07605547 | 5.84642627 | 3.23E-08   |
| Phosphocarrier protein%2C nitrogen regulation associated                                                                                     | 473.044324 | 0.44460846 | 0.13338598 | 3.33324744 | 0.00261833 |
| Chaperone protein HscA                                                                                                                       | 7869.9245  | 0.44439521 | 0.08823438 | 5.03653135 | 2.49E-06   |
| Phage shock protein C                                                                                                                        | 707.040928 | 0.44402707 | 0.13823197 | 3.21218803 | 0.00385886 |
| Putative uncharacterized protein YrbL                                                                                                        | 2814.31172 | 0.44372802 | 0.13182979 | 3.36591623 | 0.00234762 |
| Annodoxychorismate lyase                                                                                                                     | 1061.92997 | 0.44261022 | 0.13882937 | 3.18815989 | 0.00415322 |
| Probable transport protein YifK                                                                                                              | 887.816977 | 0.44215346 | 0.13660102 | 3.23682401 | 0.00356278 |
| Ribonucleotide reductase of class Ib (aerobic)%2C alpha subunit                                                                              | 14947.3707 | 0.44132565 | 0.11350689 | 3.88809557 | 0.00037431 |
| TrkA%2C Potassium channel-family protein                                                                                                     | 3892.30066 | 0.44127978 | 0.1035857  | 4.26004534 | 8.50E-05   |
| FIG034389 (not subsystem-based): hypothetical protein                                                                                        | 529.688396 | 0.44101349 | 0.10539863 | 4.18424324 | 0.0001156  |

|                                                                                                  |            |            |            |            |            |
|--------------------------------------------------------------------------------------------------|------------|------------|------------|------------|------------|
| Putative membrane protein                                                                        | 1365.61638 | 0.44098697 | 0.08654335 | 5.09556165 | 1.86E-06   |
| Ethanolamine utilization polyhedral-body-like protein EutL                                       | 403.346344 | 0.43859349 | 0.15202503 | 2.88500832 | 0.01019113 |
| Iron-sulfur cluster assembly scaffold protein IscU                                               | 4524.84253 | 0.43614634 | 0.1174385  | 3.71382761 | 0.00071016 |
| LSU ribosomal protein L34p                                                                       | 249.527724 | 0.43582788 | 0.19090562 | 2.28294944 | 0.0477213  |
| Phosphate transport ATP-binding protein PstB (TC 3.A.1.7.1)                                      | 1168.22539 | 0.43541131 | 0.12146725 | 3.58459846 | 0.00112398 |
| Cold-shock DEAD-box protein A                                                                    | 21096.6983 | 0.43531935 | 0.14515236 | 2.99905112 | 0.00734205 |
| hypothetical protein                                                                             | 729.216901 | 0.43505502 | 0.16229622 | 2.68062319 | 0.01793387 |
| IS1 ORF1                                                                                         | 95.7746149 | 0.43444221 | 0.18474704 | 2.35155169 | 0.04068419 |
| Uncharacterized protein YfiR precursor                                                           | 970.699577 | 0.43433397 | 0.13541718 | 3.2073771  | 0.00391671 |
| Putative preQ0 transporter                                                                       | 232.090024 | 0.43350158 | 0.17382067 | 2.49395871 | 0.02888614 |
| Putative isomerase                                                                               | 242.408002 | 0.43258135 | 0.15510691 | 2.78892374 | 0.01332935 |
| Biofilm PGA synthesis deacetylase PgaB                                                           | 259.38027  | 0.4325721  | 0.14411743 | 3.00152515 | 0.00729559 |
| Transcriptional activator of cad operon                                                          | 975.68908  | 0.43178513 | 0.10514394 | 4.10660975 | 0.00015869 |
| Putative DMT superfamily metabolite efflux protein precursor                                     | 143.971335 | 0.43173154 | 0.1827048  | 2.36300059 | 0.03953982 |
| D-mannonate oxidoreductase                                                                       | 642.855134 | 0.43150492 | 0.12337163 | 3.49760244 | 0.00151295 |
| UDP-glucose dehydrogenase                                                                        | 720.225155 | 0.43145736 | 0.1215903  | 3.5484522  | 0.00127665 |
| Free methionine-(R)-sulfoxide reductase%2C contains GAF domain                                   | 1986.43204 | 0.43114859 | 0.08477535 | 5.08577806 | 1.95E-06   |
| Spermidine Putrescine ABC transporter permease component potC (TC 3.A.1.11.1)                    | 480.204975 | 0.43061017 | 0.1471044  | 2.92724195 | 0.00904371 |
| Putative NAD(P)-dependent oxidoreductase EC-YbbO                                                 | 2215.66277 | 0.43010922 | 0.10265446 | 4.18987371 | 0.00011315 |
| Transcriptional regulator%2C TetR family                                                         | 148.780983 | 0.42952935 | 0.17707019 | 2.42575753 | 0.03426884 |
| L-sorbose 1-phosphate reductase                                                                  | 156.938246 | 0.42804972 | 0.17132767 | 2.49842721 | 0.02855211 |
| Histidine ABC transporter%2C histidine-binding periplasmic protein precursor HisJ (TC 3.A.1.3.1) | 10862.4659 | 0.42559819 | 0.15777596 | 2.69748448 | 0.01713499 |
| FIG146278: Maf/YceF/YhdE family protein                                                          | 4413.77194 | 0.42515303 | 0.08204561 | 5.18191054 | 1.21E-06   |
| Cyclic di-GMP binding protein precursor                                                          | 12879.1545 | 0.42506274 | 0.10502944 | 4.04708175 | 0.0002028  |
| Protease III precursor                                                                           | 2726.76895 | 0.42505543 | 0.07668169 | 5.54311531 | 1.74E-07   |
| CFA/I fimbrial subunit C usher protein                                                           | 3049.69958 | 0.42460526 | 0.11873081 | 3.576201   | 0.00115662 |
| Putative iron compound-binding protein of ABC transporter family                                 | 2079.75127 | 0.42392593 | 0.14724335 | 2.8790838  | 0.01035607 |
| Glutathione ABC transporter ATP-binding protein                                                  | 11031.5032 | 0.42354324 | 0.11178652 | 3.78885777 | 0.00054037 |
| FIG00639146: hypothetical protein                                                                | 624.933986 | 0.42319026 | 0.16948028 | 2.4969882  | 0.02865438 |
| Branched-chain amino acid transport ATP-binding protein LivF (TC 3.A.1.4.1)                      | 350.665022 | 0.4223939  | 0.13927054 | 3.03290211 | 0.00667005 |
| FIG00637979: hypothetical protein                                                                | 834.631242 | 0.42219403 | 0.08738616 | 4.83136054 | 6.71E-06   |
| Arabinose-proton symporter                                                                       | 2688.3959  | 0.42142959 | 0.08285482 | 5.08636167 | 1.94E-06   |
| FIG00641944: hypothetical protein                                                                | 370.612049 | 0.42111443 | 0.15775079 | 2.66949177 | 0.01844948 |
| Protein yhjK                                                                                     | 1452.45516 | 0.42078331 | 0.07904731 | 3.52318343 | 5.77E-07   |
| Methionine ABC transporter substrate-binding protein                                             | 7461.53252 | 0.4206244  | 0.13865136 | 3.03368402 | 0.00665667 |
| SanA protein                                                                                     | 167.14304  | 0.42013883 | 0.16064957 | 2.61525035 | 0.02117599 |
| L-xylulose/3-keto-L-gulonate kinase                                                              | 102.918056 | 0.41881424 | 0.17131615 | 2.44468632 | 0.03270824 |
| Bacterioferritin                                                                                 | 3119.97351 | 0.41829799 | 0.09756242 | 4.28749086 | 7.58E-05   |
| Hypothetical MFS-type transporter protein YcaD                                                   | 3644.14215 | 0.41743918 | 0.1634691  | 2.5362753  | 0.02483303 |
| Uncharacterized ABC transporter%2C periplasmic component YrbD                                    | 839.897096 | 0.41731714 | 0.08857573 | 4.71141628 | 1.19E-05   |
| Phosphoenolpyruvate-dihydroxyacetone phosphotransferase operon regulatory protein DhaR           | 992.130833 | 0.41652899 | 0.11180106 | 3.72562646 | 0.00068126 |
| UDP-glucose:(heptosyl) LPS alpha1%2C3-glucosyltransferase WaaG                                   | 2963.30263 | 0.41436726 | 0.11473801 | 3.61142089 | 0.00102541 |
| Low-affinity inorganic phosphate transporter                                                     | 163.481685 | 0.41299633 | 0.1763883  | 2.34089412 | 0.0418067  |
| FIG00732392: hypothetical protein                                                                | 1592.14392 | 0.41275359 | 0.16136372 | 2.55790827 | 0.02456571 |
| Tail-specific protease precursor                                                                 | 9770.19092 | 0.4126295  | 0.11670479 | 3.53566889 | 0.00133078 |
| Regulatory protein SoxS                                                                          | 1227.05281 | 0.41249446 | 0.14299099 | 2.88475839 | 0.01019362 |
| Ribosomal RNA large subunit methyltransferase N                                                  | 1942.55044 | 0.41238333 | 0.11480446 | 3.59204972 | 0.0010954  |
| Ribosomal large subunit pseudouridine synthase F                                                 | 333.236832 | 0.41225611 | 0.128852   | 3.19945458 | 0.00401356 |
| Putrescine transport ATP-binding protein PotA (TC 3.A.1.11.1)                                    | 1731.82739 | 0.41180337 | 0.08533458 | 4.82575004 | 6.89E-06   |
| LysR family transcriptional regulator YneJ                                                       | 178.223805 | 0.41139187 | 0.14754431 | 2.78825984 | 0.01334959 |
| Ferrichrome-iron receptor                                                                        | 4299.25444 | 0.41092    | 0.12778922 | 3.21560764 | 0.0038179  |
| O-antigen ligase                                                                                 | 1266.19196 | 0.41087744 | 0.12047475 | 3.41048588 | 0.00203443 |
| Uncharacterized protein YrbK clustered with lipopolysaccharide transporters                      | 2139.30293 | 0.41015459 | 0.09225422 | 4.44591697 | 3.90E-05   |
| DNA topoisomerase I                                                                              | 7923.49552 | 0.40998075 | 0.08023796 | 5.10956097 | 1.74E-06   |
| predicted GTPase                                                                                 | 4367.16805 | 0.40973348 | 0.10016169 | 4.09072061 | 0.00016954 |
| YihE protein%2C a ser/thr kinase implicated in LPS synthesis and Cpx signalling                  | 1438.82896 | 0.40951757 | 0.08823302 | 4.64131898 | 1.63E-05   |
| Putative enzyme                                                                                  | 294.282544 | 0.40926727 | 0.12467662 | 3.28263036 | 0.0030853  |
| Shikimate kinase I                                                                               | 4671.4001  | 0.40875748 | 0.10480851 | 3.90004098 | 0.00035828 |
| Iron binding protein IscA for iron-sulfur cluster assembly                                       | 7073.36196 | 0.40733222 | 0.06839918 | 5.95522079 | 1.73E-08   |
| Polymyxin resistance protein PmrL%2C sucrose-6 phosphate hydrolase                               | 254.996202 | 0.40626889 | 0.16954182 | 2.39627531 | 0.03665008 |
| Dienelactone hydrolase family                                                                    | 427.598695 | 0.40577723 | 0.15494405 | 2.61886292 | 0.02098466 |
| Multidrug transporter MdtB                                                                       | 600.6299   | 0.40531049 | 0.16080372 | 2.52052942 | 0.0270425  |
| FIG00948312: hypothetical protein                                                                | 2364.01572 | 0.40522935 | 0.12801159 | 3.16556758 | 0.00446666 |
| Transcriptional activator RfaH                                                                   | 254.483109 | 0.40493915 | 0.15728539 | 2.57455037 | 0.02354252 |
| Syd protein                                                                                      | 335.391457 | 0.40472928 | 0.11066796 | 3.65714958 | 0.00087243 |
| Inner membrane protein YrbG%2C predicted calcium/sodium:proton antiporter                        | 891.446962 | 0.4045334  | 0.12429619 | 3.25459224 | 0.00337011 |
| Potassium-transporting ATPase C chain                                                            | 320.490867 | 0.40448113 | 0.13290495 | 3.04338641 | 0.0064759  |
| Kup system potassium uptake protein                                                              | 1119.61426 | 0.40423394 | 0.10587992 | 3.81785281 | 0.00048691 |
| 2-keto-3-deoxy-D-arabino-heptulosonate-7-phosphate synthase I alpha                              | 17303.289  | 0.40356791 | 0.09096597 | 4.4364712  | 4.05E-05   |
| Phenylalanyl-tRNA synthetase alpha chain                                                         | 5023.92803 | 0.40343808 | 0.09423333 | 4.28126762 | 7.77E-05   |
| AroM protein                                                                                     | 724.210847 | 0.40260035 | 0.13583209 | 2.96395617 | 0.00812331 |
| Dipeptide transport system permease protein DppB (TC 3.A.1.5.2)%3B putative hemin permease       | 1161.46657 | 0.40250635 | 0.11215125 | 3.58896004 | 0.00110768 |
| Dipeptide transport ATP-binding protein DppF (TC 3.A.1.5.2)                                      | 1581.36199 | 0.40223081 | 0.12590016 | 3.19483953 | 0.00406827 |
| Uncharacterized ABC transporter%2C permease component YrbE                                       | 1318.70648 | 0.40178185 | 0.10907534 | 3.68352611 | 0.0007932  |
| Sialic acid transporter (permease) NanT                                                          | 96.97534   | 0.401781   | 0.17619529 | 2.28031637 | 0.04794448 |
| Formate dehydrogenase O gamma subunit                                                            | 1913.38323 | 0.40105639 | 0.10193947 | 3.93425994 | 0.00031556 |
| S-adenosylmethionine:tRNA ribosyltransferase-isomerase                                           | 881.391623 | 0.40088479 | 0.09529015 | 4.20699075 | 0.00010573 |
| Rhodanese-related sulfurtransferases                                                             | 1791.86693 | 0.40085961 | 0.12386354 | 3.23630036 | 0.00356488 |
| DNA-binding protein H-NS                                                                         | 65364.9062 | 0.40057771 | 0.10339434 | 3.87427112 | 0.00039435 |
| Cation transport regulator chaB                                                                  | 552.94642  | 0.39935841 | 0.1594144  | 2.50515893 | 0.0280687  |
| Molybdenum cofactor biosynthesis protein MoaA                                                    | 2268.52164 | 0.39925241 | 0.10280773 | 3.88348646 | 0.00038029 |
| BAX protein                                                                                      | 826.895605 | 0.39899932 | 0.16388533 | 2.43462503 | 0.03352001 |
| FIG001587: exported protein                                                                      | 3070.81253 | 0.39890276 | 0.07951629 | 5.01661707 | 2.74E-06   |
| Transcriptional regulator NanR                                                                   | 2322.59224 | 0.39880336 | 0.08474784 | 4.70576424 | 1.22E-05   |
| Glutathione-regulated potassium-efflux system ancillary protein KefG                             | 722.500133 | 0.39879772 | 0.1150249  | 3.46705542 | 0.001673   |
| Putative lipoprotein                                                                             | 1566.50642 | 0.3973723  | 0.10720302 | 3.70672693 | 0.00072929 |
| DNA polymerase III subunits gamma and tau                                                        | 2898.866   | 0.39730178 | 0.08340049 | 4.76378242 | 9.28E-06   |
| Exoribonuclease II                                                                               | 5663.52286 | 0.39709137 | 0.09916358 | 4.00440751 | 0.0002411  |
| hypothetical protein                                                                             | 151.872916 | 0.39681713 | 0.15703173 | 2.52698696 | 0.02662826 |
| Putative major fimbrial subunit precursor                                                        | 101.845794 | 0.39657988 | 0.17034531 | 2.32809392 | 0.04302447 |
| Alkyl hydroperoxide reductase protein C                                                          | 54332.6178 | 0.39629443 | 0.14724112 | 2.69146577 | 0.01742017 |
| Lysyl-lysine 2%2C3-aminomutase                                                                   | 1327.93722 | 0.39514612 | 0.09497367 | 4.16058609 | 0.00012738 |
| Multidrug translocase MdfA                                                                       | 845.408088 | 0.39157201 | 0.10406043 | 3.762929   | 0.00059469 |
| Lipopolysaccharide core biosynthesis protein WaaP                                                | 1884.84451 | 0.39142281 | 0.12517597 | 3.12698048 | 0.00501832 |
| Inner membrane protein YiaH                                                                      | 280.741477 | 0.39021    | 0.13408425 | 2.91018516 | 0.00948339 |
| hypothetical protein                                                                             | 1521.88811 | 0.38948449 | 0.13370311 | 2.91305481 | 0.00940189 |
| Benzoate transport protein                                                                       | 338.825267 | 0.38937456 | 0.12772806 | 3.04846531 | 0.00637116 |
| 5'-nucleotidase YijG                                                                             | 1295.25453 | 0.38879342 | 0.10102405 | 3.84852346 | 0.00043446 |
| Lipopolysaccharide core biosynthesis protein RfaY                                                | 1046.95803 | 0.38753476 | 0.16232826 | 2.38735242 | 0.03742941 |
| Glycerophosphoryl diester phosphodiesterase                                                      | 1046.4206  | 0.38530293 | 0.12462773 | 3.09163088 | 0.00559236 |
| Putative oxidoreductase linked to yggC                                                           | 209.898694 | 0.38427223 | 0.14963853 | 2.56800319 | 0.02394439 |
| 5'-nucleotidase                                                                                  | 130.371937 | 0.38401099 | 0.15727641 | 2.44163113 | 0.0329392  |
| Integration host factor alpha subunit                                                            | 20508.7557 | 0.38392732 | 0.10284033 | 3.7332371  | 0.0006197  |
| FIG017861: hypothetical protein                                                                  | 2008.17501 | 0.38392457 | 0.11049082 | 3.47471919 | 0.00163251 |
| Lysine decarboxylase 2%2C constitutive                                                           | 3613.36418 | 0.38365114 | 0.10721262 | 3.57841396 | 0.00114848 |
| Gluconate permease%2C Bsu4004 homolog                                                            | 297.821103 | 0.38362437 | 0.13803871 | 2.77910725 | 0.01369516 |
| Putative membrane protein                                                                        | 327.569731 | 0.38214429 | 0.1144922  | 3.33773213 | 0.00257976 |









|                                                                                                              |            |            |            |            |            |
|--------------------------------------------------------------------------------------------------------------|------------|------------|------------|------------|------------|
| DnaA regulatory inactivator Hda (Homologous to DnaA)                                                         | 1229.79052 | -0.2850937 | 0.09815583 | -2.9045007 | 0.00963593 |
| MFS superfamily export protein YceL                                                                          | 3962.09903 | -0.2851055 | 0.11313535 | -2.5200394 | 0.02706598 |
| Molybdopterin biosynthesis protein MoeB                                                                      | 1826.41392 | -0.2861193 | 0.09382867 | -3.0493801 | 0.00635551 |
| SSU ribosomal protein S5p (S2e)                                                                              | 25738.2035 | -0.286132  | 0.09236893 | -3.0977085 | 0.00549854 |
| Glutaminyl-tRNA synthetase                                                                                   | 9004.14013 | -0.286209  | 0.07272482 | -3.9355063 | 0.00031422 |
| SSU ribosomal protein S2p (SAe)                                                                              | 26786.8348 | -0.2864717 | 0.11435042 | -2.5052094 | 0.0280687  |
| FIG00638135: hypothetical protein                                                                            | 505.808889 | -0.2874877 | 0.09556077 | -3.0084279 | 0.00715654 |
| D-alanine-D-alanine ligase                                                                                   | 12137.5166 | -0.2876372 | 0.10734792 | -2.6194859 | 0.01798153 |
| Copper-sensing two-component system response regulator CpxR                                                  | 5541.76239 | -0.2882962 | 0.08143052 | -3.5403949 | 0.0013108  |
| Aspartate-semialdehyde dehydrogenase                                                                         | 2517.26911 | -0.2900492 | 0.11258426 | -2.5762857 | 0.02344794 |
| Pyridoxal kinase                                                                                             | 1906.49434 | -0.2905895 | 0.07766985 | -3.7413421 | 0.00064267 |
| UPFD149 exported protein YgfB                                                                                | 2600.21613 | -0.2908241 | 0.10219735 | -2.8457105 | 0.01138123 |
| Poly(A) polymerase                                                                                           | 7992.92476 | -0.2910995 | 0.07818708 | -3.7231156 | 0.00068655 |
| D-alanyl-D-alanine carboxypeptidase                                                                          | 2861.94831 | -0.2923351 | 0.08092426 | -3.6124535 | 0.00102279 |
| Glutamate 5-kinase                                                                                           | 9749.521   | -0.2927024 | 0.07383167 | -3.9644561 | 0.00028135 |
| LSU ribosomal protein L23p (L23Ae)                                                                           | 11241.6285 | -0.2929001 | 0.11068038 | -2.6463598 | 0.01955942 |
| Per-activated serine protease autotransporter enterotoxin EspC                                               | 7937.26922 | -0.293631  | 0.08231918 | -3.5669817 | 0.00119221 |
| LysR family transcriptional regulator YeiE                                                                   | 897.06785  | -0.2948873 | 0.11001013 | -2.6805469 | 0.01793387 |
| Asparaginyl-tRNA synthetase                                                                                  | 12205.1588 | -0.294923  | 0.09028594 | -3.2665443 | 0.00324344 |
| NfuA Fe-S protein maturation                                                                                 | 4062.07381 | -0.2950787 | 0.1008744  | -2.925209  | 0.00909792 |
| S-formylglutathione hydrolase                                                                                | 923.362726 | -0.2954165 | 0.11699    | -2.5251432 | 0.02674221 |
| Putative PTS system IIA component yadI                                                                       | 524.275763 | -0.2954517 | 0.10021815 | -2.9480859 | 0.00849848 |
| Aspartokinase                                                                                                | 5487.63262 | -0.295541  | 0.0836593  | -3.5326733 | 0.00134409 |
| TldE protein%2C part of TldE/TldD proteolytic complex                                                        | 7377.69003 | -0.2960716 | 0.06963989 | -4.2514651 | 8.81E-05   |
| Putative sugar kinase%2C PfkB family protein                                                                 | 349.357801 | -0.2961578 | 0.11340551 | -2.6114937 | 0.02138859 |
| COG2110%2C Macro domain%2C possibly ADP-ribose binding module                                                | 992.520362 | -0.2963698 | 0.11628888 | -2.5485652 | 0.02518398 |
| Ribosomal RNA small subunit methyltransferase C                                                              | 1493.83421 | -0.2973576 | 0.10342971 | -2.8749724 | 0.01047464 |
| Phosphatase YidA                                                                                             | 3860.64846 | -0.2980112 | 0.09498444 | -3.1374736 | 0.00487138 |
| Universal stress protein F                                                                                   | 2878.63643 | -0.2997401 | 0.11928317 | -2.512845  | 0.02755806 |
| Hypoxanthine-guanine phosphoribosyltransferase                                                               | 1853.33099 | -0.2998538 | 0.09269861 | -3.234718  | 0.00358247 |
| Putative uncharacterized protein YeaK                                                                        | 1410.90239 | -0.3000953 | 0.09589446 | -3.1294331 | 0.00498436 |
| Outer membrane protein X precursor                                                                           | 129907.434 | -0.3002757 | 0.08410934 | -3.5700636 | 0.00117992 |
| Ribonucleotide reductase transcriptional regulator NrdR                                                      | 2492.44868 | -0.3003768 | 0.09785408 | -3.0696402 | 0.00597838 |
| FIG00639467: hypothetical protein                                                                            | 3662.21219 | -0.3010392 | 0.12921546 | -2.3297461 | 0.04285485 |
| Mannonate dehydratase                                                                                        | 488.806554 | -0.3021777 | 0.13227773 | -2.2844183 | 0.04758031 |
| Undecaprenyl diphosphate synthase                                                                            | 4982.44908 | -0.3028115 | 0.07288756 | -4.1545021 | 0.00013059 |
| Cell division protein FtsA                                                                                   | 15467.7923 | -0.3053641 | 0.10232829 | -2.9841614 | 0.0076437  |
| Protein acetyltransferase                                                                                    | 1229.03185 | -0.3062201 | 0.08698518 | -3.5203707 | 0.00140413 |
| Dehydrogenase                                                                                                | 1779.68326 | -0.3071498 | 0.09249459 | -3.3207323 | 0.00272867 |
| FIG00638276: hypothetical protein                                                                            | 486.81559  | -0.3071961 | 0.1156009  | -2.6573853 | 0.01901804 |
| Putative ABC transporter ATP-binding protein                                                                 | 1716.10139 | -0.3075727 | 0.12758095 | -2.4108045 | 0.03547362 |
| GTP-binding protein EngB                                                                                     | 521.370305 | -0.3081014 | 0.12714219 | -2.4232823 | 0.03448691 |
| AmpE protein                                                                                                 | 3029.55644 | -0.3084382 | 0.08747958 | -3.5258312 | 0.00137739 |
| Putative oxidoreductase                                                                                      | 911.5923   | -0.3086461 | 0.12804306 | -2.4104866 | 0.0354853  |
| LSU ribosomal protein L18p (L5e)                                                                             | 15358.5024 | -0.3099081 | 0.09687769 | -3.1989625 | 0.00401794 |
| 2-O-acyl-3-methyl-6-methoxy-1%2C4-benzoquinol hydroxylase                                                    | 3322.97744 | -0.3103687 | 0.09683559 | -3.20511   | 0.00394038 |
| Citrate-6-N-acetyl-6-N-hydroxy-L-lysine ligase%2C alpha subunit                                              | 76161.7677 | -0.3108579 | 0.09304151 | -3.3410668 | 0.00255227 |
| tRNA dimethylallyltransferase                                                                                | 15699.4299 | -0.3109299 | 0.08976904 | -3.4636646 | 0.00169195 |
| LSU ribosomal protein L6p (L9e)                                                                              | 23770.6715 | -0.3110457 | 0.09968409 | -3.1203145 | 0.00512099 |
| FIG00640454: hypothetical protein                                                                            | 2328.8335  | -0.3134882 | 0.08966046 | -3.4963932 | 0.00151879 |
| Putative Transposase                                                                                         | 337.844785 | -0.3147161 | 0.12058444 | -2.6099012 | 0.02146688 |
| tRNA pseudouridine 13 synthase                                                                               | 4295.60926 | -0.3162966 | 0.09283138 | -3.4072167 | 0.00205623 |
| D-Galactonate repressor DgoR                                                                                 | 762.769131 | -0.3184434 | 0.13209154 | -2.4107784 | 0.03547362 |
| SSU ribosomal protein S6p                                                                                    | 12038.946  | -0.318695  | 0.09259872 | -3.4416783 | 0.00182704 |
| D-serine dehydratase                                                                                         | 724.248794 | -0.3192612 | 0.11947819 | -2.6721298 | 0.01832387 |
| 2-C-methyl-D-erythritol 2%2C4-cyclodiphosphate synthase                                                      | 1251.24051 | -0.3194073 | 0.11583776 | -2.7573674 | 0.01457029 |
| FIG00638108: hypothetical protein                                                                            | 1971.54058 | -0.3201184 | 0.11347357 | -2.8210835 | 0.01219496 |
| Right origin-binding protein                                                                                 | 14211.7958 | -0.3212227 | 0.10597592 | -3.0310915 | 0.00670628 |
| Multimodular transeptidase-transglycosylase                                                                  | 12363.3692 | -0.3219349 | 0.0757218  | -4.2515479 | 8.81E-05   |
| FIG00613320: hypothetical protein                                                                            | 6990.18518 | -0.3229279 | 0.10225877 | -3.1579486 | 0.00457225 |
| ABC transporter%2C permease protein YnjC                                                                     | 451.970343 | -0.3235778 | 0.13033504 | -2.4826618 | 0.02973645 |
| 16S rRNA processing protein RimM                                                                             | 17521.3936 | -0.3240351 | 0.12910168 | -2.5099214 | 0.02774678 |
| LSU ribosomal protein L4p (L1e)                                                                              | 23914.1228 | -0.3243957 | 0.11610765 | -2.7939217 | 0.01313908 |
| UDP-N-acetylmuramoylalanine--D-glutamate ligase                                                              | 15380.8837 | -0.3263202 | 0.08226197 | -3.9668421 | 0.00027909 |
| NADH dehydrogenase                                                                                           | 12035.4816 | -0.3270771 | 0.11913501 | -2.7454324 | 0.01504737 |
| L-threonine 3-dehydrogenase                                                                                  | 16375.7924 | -0.3275232 | 0.08189969 | -3.9990767 | 0.00024579 |
| Uncharacterized protein conserved in bacteria                                                                | 1067.32585 | -0.3277894 | 0.12444613 | -2.6339867 | 0.02020462 |
| Oligopeptidase A                                                                                             | 9239.22631 | -0.328267  | 0.10996664 | -2.9851512 | 0.00762334 |
| Mannitol operon repressor                                                                                    | 1019.41396 | -0.3288936 | 0.10666121 | -3.0835348 | 0.00572639 |
| FIG00896075: hypothetical protein                                                                            | 4879.45363 | -0.3289759 | 0.14131811 | -2.3279104 | 0.04302588 |
| Putative inner membrane protein                                                                              | 510.600002 | -0.3304113 | 0.10365475 | -3.1876142 | 0.00415852 |
| ADP-L-glycero-D-manno-heptose-6-epimerase                                                                    | 6822.11556 | -0.3311898 | 0.08834784 | -3.7487033 | 0.00062663 |
| Murein endopeptidase                                                                                         | 2288.03815 | -0.3321995 | 0.08050174 | -4.1266131 | 0.00014587 |
| Cytochrome c heme lyase subunit CcmF                                                                         | 510.060864 | -0.3323231 | 0.11075023 | -3.0006535 | 0.00731231 |
| Deoxyribose operon repressor%2C DeoR family                                                                  | 969.574837 | -0.333326  | 0.11588371 | -2.8763833 | 0.01043937 |
| Iron acquisition yersiniabactin synthesis enzyme (Irp1%2C polyketide synthetase)                             | 516629.191 | -0.3345931 | 0.10815299 | -3.0937013 | 0.00556671 |
| 2-O-acyl-6-methoxyphenol hydroxylase                                                                         | 4985.73971 | -0.335181  | 0.09775375 | -3.4288302 | 0.00190937 |
| Anaerobic selenate reductase%2C molybdenum cofactor-containing periplasmic protein                           | 456.996806 | -0.3352906 | 0.1458234  | -2.2992923 | 0.04595505 |
| CTP synthase                                                                                                 | 15597.7853 | -0.3362576 | 0.09633556 | -3.4904828 | 0.00154857 |
| DNA polymerase II                                                                                            | 7571.50693 | -0.3367476 | 0.08884088 | -3.7904584 | 0.00053772 |
| Nucleoid-associated protein NdpA                                                                             | 1243.88542 | -0.3372719 | 0.10973975 | -3.0733796 | 0.00591093 |
| Flavodoxin 2                                                                                                 | 808.993919 | -0.337485  | 0.10385847 | -3.2494704 | 0.00342302 |
| Putative membrane protein YfcA                                                                               | 890.593034 | -0.3388928 | 0.1491285  | -2.2724887 | 0.04876295 |
| Putative inner membrane protein                                                                              | 320.301485 | -0.3392838 | 0.12743938 | -2.6623148 | 0.01876088 |
| Mechanosensitive ion channel                                                                                 | 1299.09713 | -0.3393357 | 0.09726937 | -3.488618  | 0.00155836 |
| LSU ribosomal protein L3p (L3e)                                                                              | 27485.1586 | -0.3405679 | 0.10386793 | -3.278855  | 0.00312291 |
| Exported zinc metalloprotease YfgC precursor                                                                 | 3092.94253 | -0.3409362 | 0.08624368 | -3.9531734 | 0.00029353 |
| Asparetyl-tRNA synthetase                                                                                    | 11060.8682 | -0.3415125 | 0.09259721 | -3.6881507 | 0.00078063 |
| Iron(III) dicitrate transport system permease protein FecC (TC 3.A.1.14.1)                                   | 1169.7792  | -0.3422226 | 0.12229548 | -2.7983258 | 0.01298895 |
| Agmatinase                                                                                                   | 1409.74021 | -0.343383  | 0.1095432  | -3.134681  | 0.00491205 |
| Predicted ATP-dependent endonuclease of the OLD family%2C YbjD subgroup                                      | 6391.72709 | -0.3440147 | 0.1071813  | -3.2096521 | 0.00388825 |
| Phenazine biosynthesis protein PhzF                                                                          | 785.181609 | -0.3447095 | 0.10173959 | -3.3881546 | 0.00218866 |
| Phosphoenolpyruvate-dihydroxyacetone phosphotransferase                                                      | 537.442452 | -0.3460364 | 0.12173023 | -2.8426495 | 0.01147864 |
| Phosphoglycerate mutase                                                                                      | 1423.2534  | -0.3462125 | 0.12256724 | -2.8246743 | 0.01207724 |
| Acetyl esterase                                                                                              | 199.841514 | -0.346327  | 0.1300088  | -2.6638735 | 0.01870285 |
| ABC transporter%2C ATP-binding protein                                                                       | 10726.6171 | -0.3492743 | 0.08996078 | -3.882517  | 0.00038151 |
| FKBP-type peptidyl-prolyl cis-trans isomerase FklB                                                           | 1534.15011 | -0.3493673 | 0.10425777 | -3.3509951 | 0.00247369 |
| 6%2C7-dimethyl-8-ribityllumazine synthase                                                                    | 4890.99668 | -0.3499203 | 0.08881859 | -3.9397195 | 0.000309   |
| Multidrug resistance protein A                                                                               | 557.817839 | -0.3502201 | 0.10550415 | -3.194911  | 0.00273669 |
| Mobile element protein                                                                                       | 282.73937  | -0.3506751 | 0.14731733 | -2.3804064 | 0.03800083 |
| Acyl carrier protein phosphodiesterase                                                                       | 1121.9741  | -0.3509463 | 0.11850879 | -2.9613526 | 0.00817294 |
| RelE/StbE replicon stabilization toxin                                                                       | 4296.47377 | -0.3510872 | 0.11465322 | -3.0621664 | 0.00611887 |
| Putative ATP-binding component of a transport system                                                         | 683.217788 | -0.3519237 | 0.1034742  | -3.4010773 | 0.00209222 |
| Outer membrane lipoprotein SmpA%2C a component of the essential YaeT outer-membrane protein assembly complex | 3255.26155 | -0.3519519 | 0.09236081 | -3.8106192 | 0.00050062 |
| Co-activator of prophage gene expression IbrA                                                                | 5920.16903 | -0.3520019 | 0.09032044 | -3.8972562 | 0.00036185 |
| Membrane protein involved in the export of O-antigen%2C teichoic acid lipoteichoic acids                     | 1118.38624 | -0.3531492 | 0.10687184 | -3.3044177 | 0.00287161 |
| C4-dicarboxylate transporter DcuA                                                                            | 7798.15498 | -0.3535362 | 0.11037757 | -3.2029715 | 0.00396732 |

|                                                                                                  |            |            |            |            |            |
|--------------------------------------------------------------------------------------------------|------------|------------|------------|------------|------------|
| 3-dehydroquinate dehydratase I                                                                   | 1374.63581 | -0.3536093 | 0.11759781 | -3.0069379 | 0.00718757 |
| Fructokinase                                                                                     | 180.027479 | -0.3536481 | 0.14866142 | -2.3788828 | 0.03814055 |
| COG1720: Uncharacterized conserved protein                                                       | 1337.21246 | -0.3537877 | 0.11759241 | -3.0085926 | 0.00715654 |
| Translation elongation factor Ts                                                                 | 26920.1914 | -0.3540894 | 0.1145859  | -3.0901657 | 0.00561669 |
| Methionine aminotransferase%2C PLP-dependent                                                     | 1098.22146 | -0.3544095 | 0.1285205  | -2.7576103 | 0.01456717 |
| MiIA-interacting protein MipA                                                                    | 1575.45692 | -0.3548997 | 0.10228639 | -3.4696672 | 0.00165905 |
| Ribosome hibernation protein YhbH                                                                | 10815.096  | -0.3570036 | 0.09901796 | -3.6054433 | 0.00104485 |
| Ferric hydroxamate ABC transporter (TC 3.A.1.14.3)%2C ATP-binding protein FluC                   | 3790.918   | -0.3570092 | 0.10969937 | -3.2544323 | 0.00337011 |
| Cob(I)alamin adenosyltransferase                                                                 | 1649.13659 | -0.3570473 | 0.08480339 | -4.2102946 | 0.00010447 |
| ATP binding protein                                                                              | 3240.70801 | -0.3571888 | 0.09317087 | -3.8336962 | 0.00045868 |
| TsaD/Kae1/Orf7 protein%2C required for threonylcarbamoyladenosine t(6)A37 formation in tRNA      | 1479.07952 | -0.35838   | 0.14222103 | -2.5198807 | 0.02706598 |
| SSU ribosomal protein S8p (S15Ae)                                                                | 12180.3792 | -0.3591301 | 0.09599227 | -3.7412404 | 0.00064267 |
| %2C5-diketo-D-gluconic acid reductase                                                            | 2381.50158 | -0.3602299 | 0.13687406 | -2.6318346 | 0.02029198 |
| Periplasmic beta-glucosidase                                                                     | 3202.87372 | -0.3613931 | 0.09506941 | -3.8013603 | 0.00051694 |
| Deoxyguanosinetriphosphate triphosphohydrolase                                                   | 4360.26534 | -0.3617908 | 0.08753496 | -4.1331008 | 0.00014229 |
| Uncharacterized protein YeaC                                                                     | 766.333768 | -0.362571  | 0.13763964 | -2.6342046 | 0.02020189 |
| Transcription termination protein NusB                                                           | 9262.7556  | -0.3627172 | 0.10709517 | -3.3868668 | 0.00219462 |
| Uracil-DNA glycosylase%2C family 1                                                               | 1335.18783 | -0.3630816 | 0.14341815 | -2.5316296 | 0.02634275 |
| Putative cytoplasmic protein                                                                     | 1244.54475 | -0.3631698 | 0.11129916 | -3.2630053 | 0.00328008 |
| Chorismate synthase                                                                              | 3631.18405 | -0.3637167 | 0.07522757 | -4.8348849 | 6.60E-06   |
| ShiA homolog                                                                                     | 2449.15087 | -0.3647944 | 0.12172581 | -2.9968535 | 0.00738712 |
| Hypothetical transcriptional regulator ygbI                                                      | 492.660288 | -0.3672537 | 0.12482303 | -2.9421947 | 0.00865698 |
| putative secreted protein                                                                        | 3514.70726 | -0.3673657 | 0.09338114 | -3.9340459 | 0.00031563 |
| Mobile element protein                                                                           | 13976.5067 | -0.367447  | 0.10848023 | -3.3872255 | 0.0021932  |
| LSU ribosomal protein L24p (L26e)                                                                | 14769.9732 | -0.367686  | 0.10391252 | -3.5384183 | 0.00131791 |
| FIG001674: hypothetical protein                                                                  | 1105.43785 | -0.3685432 | 0.12313314 | -2.9930464 | 0.00746281 |
| Malate dehydrogenase                                                                             | 18605.683  | -0.3689096 | 0.11580519 | -3.1856055 | 0.00418237 |
| Hydrogenase maturation protease                                                                  | 737.261413 | -0.3690573 | 0.12722151 | -2.9009036 | 0.00973645 |
| hemimethylated DNA binding protein YccV                                                          | 2708.56005 | -0.3690924 | 0.15948905 | -2.314218  | 0.04429848 |
| Sensor protein of zinc sigma-54-dependent two-component system                                   | 356.478196 | -0.371119  | 0.12411596 | -2.990099  | 0.00753091 |
| NADP-specific glutamate dehydrogenase                                                            | 17132.7782 | -0.371215  | 0.10888447 | -3.4092556 | 0.00204227 |
| Cytidine deaminase                                                                               | 4380.01768 | -0.3717562 | 0.08879417 | -4.1867182 | 0.00011464 |
| Tagatose 1%2C6-bisphosphate aldolase                                                             | 171.632425 | -0.3721457 | 0.16040149 | -2.3200889 | 0.04375168 |
| L-arabinose 1-dehydrogenase                                                                      | 2298.77628 | -0.3722207 | 0.10992797 | -3.3860417 | 0.00219979 |
| ADP-heptose synthase                                                                             | 5275.54093 | -0.3724781 | 0.07270188 | -5.1233626 | 1.63E-06   |
| Phospholipase A1 precursor                                                                       | 880.433637 | -0.3731963 | 0.12779595 | -2.9202515 | 0.00921304 |
| FIG00641015: hypothetical protein                                                                | 188.363541 | -0.3742918 | 0.16146513 | -2.3180971 | 0.04394402 |
| Riboflavin kinase                                                                                | 6176.34327 | -0.3745597 | 0.06648849 | -5.6334512 | 1.07E-07   |
| Cystathionine gamma-synthase                                                                     | 1875.26389 | -0.3751227 | 0.094994   | -3.9489094 | 0.00029857 |
| FIG01199637: hypothetical protein                                                                | 1165.89162 | -0.3778173 | 0.10673712 | -3.5396991 | 0.00131335 |
| tRNA <sub>Cm</sub> 32/Ums32 methyltransferase                                                    | 2260.98464 | -0.3785209 | 0.090504   | -4.182367  | 0.00011645 |
| N-acetylmuramoyl-L-alanine amidase                                                               | 1969.59214 | -0.3796869 | 0.09519875 | -3.9883603 | 0.00025653 |
| Folate-dependent protein for Fe/S cluster synthesis/repair in oxidative stress                   | 4064.80491 | -0.3803773 | 0.0884024  | -4.3027944 | 7.09E-05   |
| ABC transporter%2C ATP-binding protein YnjD                                                      | 214.572537 | -0.3807725 | 0.1583926  | -2.403979  | 0.03598779 |
| Uridine kinase                                                                                   | 799.962241 | -0.3819665 | 0.10853598 | -3.519261  | 0.00140905 |
| Nucleoside permease NupG                                                                         | 557.977816 | -0.3821322 | 0.1030732  | -3.7073868 | 0.00072793 |
| L-seryl-tRNA(Sec) selenium transferase                                                           | 1829.73072 | -0.382314  | 0.09013522 | -4.2415613 | 9.17E-05   |
| Lipoprotein signal peptidase                                                                     | 5173.09957 | -0.3825253 | 0.09807793 | -3.9002183 | 0.00035828 |
| D-mannonate oxidoreductase                                                                       | 812.167263 | -0.3827309 | 0.09591034 | -3.9905073 | 0.00025442 |
| Xaa-Pro aminopeptidase                                                                           | 10005.5881 | -0.3835397 | 0.08601848 | -4.4588055 | 3.69E-05   |
| Hydrogenase-2 operon protein hybE                                                                | 681.096028 | -0.3844173 | 0.15099739 | -2.5458536 | 0.02535548 |
| LSU ribosomal protein L35p                                                                       | 7975.67628 | -0.3845645 | 0.13111008 | -2.9331424 | 0.0088885  |
| Signal transduction histidine kinase CheA                                                        | 27896.8691 | -0.3863103 | 0.11132217 | -3.4702013 | 0.00165798 |
| Acetate operon repressor                                                                         | 1323.72811 | -0.3864467 | 0.16528149 | -2.3381124 | 0.04204195 |
| Thiamine-monophosphate kinase                                                                    | 2654.58488 | -0.3877028 | 0.09147234 | -4.23847   | 9.29E-05   |
| FIG02649: ydiI hotdog fold superfamily                                                           | 1691.78352 | -0.3885684 | 0.10347524 | -3.7551828 | 0.00061292 |
| LSU ribosomal protein L14p (L23e)                                                                | 11574.544  | -0.3907354 | 0.10271872 | -3.8039358 | 0.00051315 |
| mobilization protein                                                                             | 6743.4465  | -0.3912103 | 0.13405884 | -2.9181982 | 0.00925847 |
| Transcription accessory protein (S1 RNA-binding domain)                                          | 2943.23074 | -0.3923488 | 0.10877898 | -3.6068444 | 0.00103996 |
| Catalase                                                                                         | 21318.9789 | -0.3933696 | 0.11530795 | -3.41147   | 0.00202845 |
| Putative RTX family exoprotein A gene                                                            | 8498.28803 | -0.3935085 | 0.12847007 | -3.0630366 | 0.0061047  |
| 3-hydroxypropionate dehydrogenase                                                                | 8909.57885 | -0.3946542 | 0.0984443  | -4.0089086 | 0.00023674 |
| Holo-[acyl-carrier protein] synthase                                                             | 1206.4135  | -0.3956497 | 0.10248069 | -3.8607238 | 0.00041525 |
| Putative membrane protein                                                                        | 1777.66995 | -0.3960425 | 0.08067373 | -4.9091882 | 4.63E-06   |
| Monofunctional biosynthetic peptidoglycan transglycosylase                                       | 1666.7005  | -0.3962587 | 0.10199097 | -3.885233  | 0.00037786 |
| L-fucose operon activator                                                                        | 647.622922 | -0.3963878 | 0.12593094 | -3.1476606 | 0.00472476 |
| Homoserine/homoserine lactone efflux protein                                                     | 270.907244 | -0.3966721 | 0.1460069  | -2.7168035 | 0.01626746 |
| Putative metabolite transport protein yaaU                                                       | 203.856512 | -0.3972223 | 0.13870028 | -2.8638895 | 0.01080677 |
| Altronate oxidoreductase                                                                         | 244.189336 | -0.3978908 | 0.12366441 | -3.2175041 | 0.00379511 |
| Outer membrane lipoprotein pcp precursor                                                         | 11535.0785 | -0.3985372 | 0.08966087 | -4.44494   | 3.91E-05   |
| Antigen polymerase O6                                                                            | 823.71633  | -0.3996196 | 0.16258234 | -2.4579523 | 0.03166048 |
| Translation initiation factor 3                                                                  | 12781.073  | -0.3999189 | 0.12331158 | -3.243158  | 0.00349319 |
| Ferric enterobactin-binding periplasmic protein FepB (TC 3.A.1.14.2)                             | 6039.04337 | -0.4003344 | 0.08105444 | -4.9390805 | 4.02E-06   |
| Anaerobic glycerol-3-phosphate dehydrogenase subunit C                                           | 136.183287 | -0.400751  | 0.17246921 | -2.3236093 | 0.04344249 |
| DcrB protein precursor                                                                           | 3965.93769 | -0.4009647 | 0.10489656 | -3.8224771 | 0.00047896 |
| Cytochrome c heme lyase subunit CcmL / Cytochrome c heme lyase subunit CcmH                      | 497.570788 | -0.4015581 | 0.10284056 | -3.9046671 | 0.00035205 |
| DNA polymerase IV                                                                                | 5031.07115 | -0.4016163 | 0.10741525 | -3.7389129 | 0.00064816 |
| tRNA (5-methylaminomethyl-2-thiouridylate)-methyltransferase                                     | 1846.39333 | -0.4026109 | 0.11600622 | -3.4705974 | 0.00165665 |
| Protein yjbR                                                                                     | 2235.75578 | -0.402789  | 0.1081778  | -3.7233983 | 0.00068629 |
| Trehalose operon transcriptional repressor                                                       | 2205.36294 | -0.4031574 | 0.12390912 | -3.253654  | 0.00337724 |
| Arsenate reductase                                                                               | 1936.57588 | -0.4033323 | 0.11001666 | -3.666102  | 0.00084491 |
| Hydrogen peroxide-inducible genes activator                                                      | 8595.32211 | -0.4034357 | 0.08816735 | -4.5757949 | 2.19E-05   |
| Alanyl-tRNA synthetase                                                                           | 20485.7708 | -0.4036274 | 0.09257708 | -4.3599068 | 5.57E-05   |
| Succinate-semialdehyde dehydrogenase [NAD]                                                       | 3079.83271 | -0.4038876 | 0.14796441 | -2.7296268 | 0.01571368 |
| FIG00638802: hypothetical protein                                                                | 230.5895   | -0.4043392 | 0.16388393 | -2.4672292 | 0.03092597 |
| Exodeoxyribonuclease I                                                                           | 2522.34856 | -0.4048029 | 0.13272255 | -3.0499938 | 0.00634625 |
| Glyoxylate carboligase                                                                           | 430.949682 | -0.4058498 | 0.11236137 | -3.6120046 | 0.00102383 |
| Putative aldolase YdjI                                                                           | 190.939089 | -0.4060822 | 0.15689523 | -2.5882377 | 0.02270607 |
| Anhydro-N-acetylmuramic acid kinase                                                              | 1602.42558 | -0.4064914 | 0.10097723 | -4.0255746 | 0.00021311 |
| C-terminal domain of CinA type 5%3B Protein Implicated in DNA repair function with RecA and MutS | 409.859718 | -0.408887  | 0.11762448 | -3.4762062 | 0.00162458 |
| NADPH:quinone oxidoreductase 2                                                                   | 783.144205 | -0.4096651 | 0.13604947 | -3.0111479 | 0.00710092 |
| FIG00640640: hypothetical protein                                                                | 479.381592 | -0.4102648 | 0.14603357 | -2.8093872 | 0.01258454 |
| Transcriptional repressor for pyruvate dehydrogenase complex                                     | 8171.37408 | -0.4108438 | 0.13356246 | -3.0760426 | 0.00586532 |
| PTS system%2C trehalose-specific IIB component                                                   | 140.712661 | -0.4136408 | 0.17421119 | -2.3743642 | 0.03855689 |
| ABC transporter involved in cytochrome c biogenesis%2C CcmB subunit                              | 87.9194755 | -0.4137772 | 0.18173152 | -2.2768599 | 0.04835929 |
| Aspartate-semialdehyde dehydrogenase                                                             | 32623.3034 | -0.4143485 | 0.09297485 | -4.4565655 | 3.72E-05   |
| Phage tail length tape-measure protein 1                                                         | 2231.68324 | -0.4144162 | 0.15758077 | -2.6298655 | 0.02036539 |
| SSU ribosomal protein S10p (S20e)                                                                | 10892.3848 | -0.4144636 | 0.12542331 | -3.304518  | 0.00287161 |
| FIG001676: Ferredoxin                                                                            | 679.225456 | -0.4145989 | 0.12130552 | -3.4178072 | 0.00198312 |
| Cytochrome c-type biogenesis protein CcmG/DsbE%2CThiol:disulfide oxidoreductase                  | 258.552342 | -0.4154769 | 0.17170027 | -2.41978   | 0.03478786 |
| Hydroxyacylglutathione hydrolase                                                                 | 2552.10865 | -0.4155401 | 0.13250944 | -3.1359282 | 0.00489416 |
| transposon resolvase                                                                             | 147.120359 | -0.4169088 | 0.16771094 | -2.4858772 | 0.0295362  |
| putative methylase YhbF                                                                          | 656.561454 | -0.4179341 | 0.12518202 | -3.3386107 | 0.00257327 |
| D-erythrose-4-phosphate dehydrogenase                                                            | 8336.53288 | -0.418193  | 0.12485334 | -3.3494739 | 0.0024857  |
| YgfY COG2938                                                                                     | 775.366282 | -0.418247  | 0.14116206 | -2.9628857 | 0.00813694 |
| Ferritin-like protein 2                                                                          | 1684.65506 | -0.4185141 | 0.15692671 | -2.6669399 | 0.01857108 |
| Oligopeptide ABC transporter%2C periplasmic oligopeptide-binding protein OppA (TC 3.A.1.5.1)     | 247.251848 | -0.4187912 | 0.15623063 | -2.6805958 | 0.01793887 |

|                                                                                                                                       |            |            |            |            |            |
|---------------------------------------------------------------------------------------------------------------------------------------|------------|------------|------------|------------|------------|
| Dihydrodipicolinate reductase                                                                                                         | 3968.03883 | -0.4191391 | 0.08870473 | -4.7251045 | 1.11E-05   |
| Translation elongation factor P                                                                                                       | 3381.4252  | -0.4195608 | 0.11599335 | -3.6171105 | 0.00100529 |
| Capsular polysaccharide ABC transporter%2C permease protein KpsM                                                                      | 3097.90302 | -0.4208926 | 0.13376735 | -3.1464527 | 0.00474144 |
| Uncharacterized HTH-type transcriptional regulator YegW                                                                               | 506.691841 | -0.4215275 | 0.13340401 | -3.1597815 | 0.00454912 |
| Pyridoxine 5'-phosphate synthase                                                                                                      | 2858.70285 | -0.4217885 | 0.09408088 | -4.4832538 | 3.33E-05   |
| Rare lipoprotein A precursor                                                                                                          | 6180.40413 | -0.4218958 | 0.09161331 | -4.6051797 | 1.92E-05   |
| Respiratory nitrate reductase beta chain                                                                                              | 688.28388  | -0.4225168 | 0.1489905  | -2.8358639 | 0.01170581 |
| Protein HI1394                                                                                                                        | 359.173014 | -0.4228015 | 0.13765429 | -3.0714735 | 0.00594529 |
| Orotidine 5'-phosphate decarboxylase                                                                                                  | 679.689911 | -0.4232405 | 0.12089148 | -3.5009949 | 0.00149586 |
| DNA recombination-dependent growth factor C                                                                                           | 1083.11209 | -0.4243829 | 0.08442883 | -5.0265168 | 2.61E-06   |
| Ischorismatase                                                                                                                        | 130.655806 | -0.4245157 | 0.16292279 | -2.6056252 | 0.02172582 |
| Peptidyl-prolyl cis-trans isomerase PpiA precursor                                                                                    | 915.523596 | -0.424632  | 0.10979047 | -3.8676578 | 0.00040394 |
| Cell division protein FtsI                                                                                                            | 2703.74005 | -0.4248966 | 0.148509   | -2.8610831 | 0.01087914 |
| Fructose-1%2C6-bisphosphatase%2C GlpX type                                                                                            | 566.817929 | -0.4251316 | 0.10734431 | -3.9604489 | 0.00028565 |
| Adenylosuccinate synthetase                                                                                                           | 33359.9638 | -0.425267  | 0.09404951 | -4.5217357 | 2.81E-05   |
| probable membrane protein b2001                                                                                                       | 266.251868 | -0.4257499 | 0.13760076 | -3.0940955 | 0.00556263 |
| Selenide%2Cwater dikinase                                                                                                             | 9318.44636 | -0.4285902 | 0.11157236 | -3.8413652 | 0.00044664 |
| FIG138517: Putative lipid carrier protein                                                                                             | 2320.80274 | -0.4298641 | 0.12543998 | -3.4268511 | 0.00192206 |
| virulence protein                                                                                                                     | 1183.57169 | -0.4303761 | 0.12910522 | -3.3335296 | 0.00261736 |
| Putative oxidoreductase                                                                                                               | 2255.8551  | -0.4306883 | 0.11350677 | -3.7943842 | 0.00053048 |
| MchC protein                                                                                                                          | 10701.5915 | -0.4307964 | 0.12862472 | -3.3492506 | 0.00248609 |
| putative%3B ORF located using Glimmer/Genemark                                                                                        | 880.622547 | -0.4323536 | 0.09263707 | -4.6671768 | 1.45E-05   |
| Transaldolase                                                                                                                         | 2498.29322 | -0.4323722 | 0.12218682 | -3.5386159 | 0.00131783 |
| L%2CD-transpeptidase Ycf5                                                                                                             | 313.785655 | -0.4326779 | 0.11780575 | -3.6728083 | 0.00082483 |
| Transcriptional regulator%2C IclR family                                                                                              | 889.670758 | -0.4337363 | 0.1178982  | -3.6789053 | 0.00080595 |
| Serine transporter                                                                                                                    | 438.401018 | -0.4340718 | 0.11887735 | -3.6514257 | 0.00089082 |
| Phosphoenolpyruvate-dihydroxyacetone phosphotransferase                                                                               | 713.463276 | -0.434077  | 0.14587123 | -2.9757545 | 0.00785192 |
| Alcohol dehydrogenase                                                                                                                 | 2120.08953 | -0.434155  | 0.11515253 | -3.7702599 | 0.00057878 |
| FIG00641173: hypothetical protein                                                                                                     | 438.614978 | -0.4342116 | 0.16982787 | -2.5567744 | 0.02463378 |
| Transcriptional regulator KdgR%2C KDG operon repressor                                                                                | 1892.81092 | -0.4342217 | 0.09889562 | -4.3907069 | 4.89E-05   |
| Ribonuclease E inhibitor RraA                                                                                                         | 3726.89508 | -0.4347548 | 0.12854078 | -3.3822327 | 0.00222469 |
| Exodeoxyribonuclease VII small subunit                                                                                                | 407.878977 | -0.4362416 | 0.12213714 | -3.5717356 | 0.00117323 |
| RNA polymerase sigma factor Ecl                                                                                                       | 7114.8091  | -0.4372345 | 0.14630061 | -2.9886036 | 0.00755062 |
| Transposase YhgA                                                                                                                      | 174.185206 | -0.4373926 | 0.15880268 | -2.7543151 | 0.01469543 |
| FIG00643651: hypothetical protein                                                                                                     | 870.376157 | -0.4381164 | 0.09950835 | -4.40281   | 4.66E-05   |
| Probable electron transfer flavoprotein-quinone oxidoreductase FixC                                                                   | 244.083996 | -0.4382464 | 0.13541392 | -3.2363468 | 0.00356488 |
| Phosphatidyglycerophosphatase A                                                                                                       | 770.132585 | -0.4382592 | 0.0994279  | -4.4078094 | 4.57E-05   |
| LSU ribosomal protein L2p (L8e)                                                                                                       | 27709.2417 | -0.4384523 | 0.1114906  | -3.9326394 | 0.00031723 |
| Putative electron transport protein YsaA                                                                                              | 293.91091  | -0.4390183 | 0.1610343  | -2.7262406 | 0.01584665 |
| ATP-dependent helicase HrpB                                                                                                           | 4642.06157 | -0.4403775 | 0.07263671 | -6.0627403 | 9.28E-09   |
| Periplasmic protein torT precursor                                                                                                    | 249.82834  | -0.44259   | 0.15326058 | -2.8878267 | 0.01011697 |
| Glutathione reductase                                                                                                                 | 7873.51501 | -0.4429776 | 0.08904551 | -4.974733  | 3.37E-06   |
| LSU ribosomal protein L1p (L10Ae)                                                                                                     | 32282.6231 | -0.4435261 | 0.141732   | -3.1293291 | 0.00498436 |
| Uncharacterized protein YidR                                                                                                          | 1104.72427 | -0.4435487 | 0.14043274 | -3.1584423 | 0.00456729 |
| Alkaline phosphatase isozyme conversion protein precursor                                                                             | 1312.24622 | -0.4436616 | 0.11311161 | -3.9223347 | 0.00032836 |
| Methionine repressor MetJ                                                                                                             | 669.899773 | -0.4442721 | 0.10724378 | -4.1426377 | 0.00013708 |
| 6-phospho-beta-glucosidase                                                                                                            | 5979.87962 | -0.4443511 | 0.09660298 | -4.5997662 | 1.97E-05   |
| Nucleoprotein/polynucleotide-associated enzyme                                                                                        | 487.831746 | -0.4448987 | 0.14147083 | -3.1448091 | 0.00476238 |
| Inosine-guanosine kinase                                                                                                              | 1781.97797 | -0.4449501 | 0.08019035 | -5.5486742 | 1.69E-07   |
| SSU ribosomal protein S17p (S11e)                                                                                                     | 13333.2109 | -0.4454286 | 0.11889813 | -3.7463042 | 0.00063171 |
| Putative Dihydrodipicolinate dehydrogenase                                                                                            | 2659.96573 | -0.445459  | 0.11873824 | -3.7516056 | 0.00061988 |
| LSU ribosomal protein L29p (L35e)                                                                                                     | 9386.66891 | -0.445639  | 0.10325395 | -4.3159513 | 6.70E-05   |
| LysR family transcriptional regulator YafC                                                                                            | 1368.68732 | -0.4456513 | 0.13021934 | -3.4223129 | 0.00195314 |
| ATPase involved in DNA repair                                                                                                         | 6174.65932 | -0.4461166 | 0.1280704  | -3.4833701 | 0.00158669 |
| Phospholipase/carboxylesterase family protein                                                                                         | 1059.00684 | -0.4462097 | 0.0903726  | -4.9374445 | 4.05E-06   |
| FIG01200175: hypothetical protein                                                                                                     | 8088.53157 | -0.4464005 | 0.07511592 | -5.9428216 | 1.86E-08   |
| 4'-phosphopantetheinyl transferase                                                                                                    | 3372.33038 | -0.4471931 | 0.19124315 | -2.3383482 | 0.04203471 |
| Tryptophanyl-tRNA synthetase                                                                                                          | 5571.00511 | -0.4480937 | 0.08844626 | -5.0662815 | 2.14E-06   |
| 1-phosphofructokinase                                                                                                                 | 3673.10449 | -0.448706  | 0.1665807  | -2.6936255 | 0.01731667 |
| Selenocysteine-specific translation elongation factor                                                                                 | 2962.16272 | -0.449678  | 0.09543743 | -4.7117568 | 1.18E-05   |
| ABC transporter%2C periplasmic spermidine-binding protein PotD (TC 3.A.1.11.1)                                                        | 3330.2767  | -0.4506866 | 0.13381071 | -3.3680908 | 0.00231333 |
| Thiosulfate sulfurtransferase%2C rhodanese                                                                                            | 4465.3399  | -0.4507924 | 0.12193509 | -3.6969867 | 0.00075673 |
| Xanthine-guanine phosphoribosyltransferase                                                                                            | 1226.43724 | -0.4510288 | 0.1239237  | -3.639568  | 0.00092689 |
| UDP-3-O-[3-hydroxymyristoyl] N-acetylglucosamine deacetylase                                                                          | 87097.9919 | -0.4514577 | 0.0842447  | -5.358886  | 4.76E-07   |
| Ureidoglycine aminohydrolase                                                                                                          | 1623.74953 | -0.4519473 | 0.10975124 | -4.1179244 | 0.00015123 |
| 4-hydroxy-3-methylbut-2-enyl diphosphate reductase                                                                                    | 4465.85842 | -0.4519569 | 0.08941053 | -5.0548508 | 2.27E-06   |
| CMP-Kdo synthetase%2C KpsU                                                                                                            | 3266.25406 | -0.4520863 | 0.14360442 | -3.1481364 | 0.00471994 |
| YbbL ABC transporter ATP-binding protein                                                                                              | 870.537    | -0.4528619 | 0.15095423 | -2.999995  | 0.00732394 |
| DNA-damage-inducible protein D                                                                                                        | 3737.56793 | -0.4539219 | 0.10017657 | -4.5312178 | 2.69E-05   |
| Response regulator of zinc sigma-54-dependent two-component system                                                                    | 1193.80469 | -0.4543903 | 0.11227702 | -4.0470465 | 0.0002028  |
| Molybdenum ABC transporter%2C periplasmic molybdenum-binding protein ModA (TC 3.A.1.8.1)                                              | 24706.9082 | -0.4545053 | 0.11599703 | -3.9182492 | 0.00033558 |
| FIG00639301: hypothetical protein                                                                                                     | 712.21457  | -0.4565101 | 0.15238221 | -2.9958225 | 0.0074079  |
| Peptidyl-prolyl cis-trans isomerase PpiB                                                                                              | 3385.75117 | -0.4570914 | 0.108374   | -4.2177219 | 0.00010135 |
| FIG002958: hypothetical protein                                                                                                       | 886.161149 | -0.4583026 | 0.11081731 | -4.1356592 | 0.00014107 |
| Capsular polysaccharide export system periplasmic protein KpsD                                                                        | 6624.18146 | -0.4583811 | 0.14707656 | -3.1166158 | 0.00517946 |
| FIG00637900: hypothetical protein                                                                                                     | 6094.20834 | -0.4589453 | 0.15212025 | -3.0169903 | 0.00698159 |
| LSU ribosomal protein L22p (L17e)                                                                                                     | 11035.4277 | -0.4589498 | 0.13235728 | -3.4675071 | 0.00167131 |
| FIG00639460: hypothetical protein                                                                                                     | 573.992841 | -0.4597091 | 0.15057741 | -3.0529753 | 0.00629831 |
| Iron(III) dicitrate transport system%2C periplasmic iron-binding protein FecB (TC 3.A.1.14.1)                                         | 4113.7456  | -0.4603724 | 0.10773281 | -4.2732793 | 8.04E-05   |
| Putative DNA processing chain A                                                                                                       | 1040.27484 | -0.4608282 | 0.09401933 | -4.9014197 | 4.80E-06   |
| Molybdopterin biosynthesis Mog protein%2Cmolybdochelatase                                                                             | 2229.74779 | -0.4610389 | 0.08454615 | -5.4531027 | 2.85E-07   |
| DNA primase                                                                                                                           | 227.485165 | -0.4622214 | 0.18608035 | -2.4839884 | 0.02965035 |
| Glycosyl hydrolase YegX%2C family 25                                                                                                  | 550.017244 | -0.4634609 | 0.19846498 | -2.3352277 | 0.04230937 |
| HtrA suppressor protein                                                                                                               | 307.596201 | -0.4666578 | 0.16425395 | -2.8410749 | 0.0152297  |
| Phage tail assembly protein                                                                                                           | 488.321379 | -0.4667776 | 0.17697946 | -2.6374675 | 0.02003766 |
| Enterobactin synthetase component F%2C serine activating enzyme                                                                       | 286044.565 | -0.4674963 | 0.09253864 | -5.0519031 | 2.30E-06   |
| Mobile element protein                                                                                                                | 120.03684  | -0.4698777 | 0.17696548 | -2.655194  | 0.01913227 |
| FIG00639383: hypothetical protein                                                                                                     | 283.629433 | -0.4699463 | 0.15197736 | -3.0922124 | 0.00558473 |
| Putative oxidoreductase                                                                                                               | 3734.53145 | -0.4703535 | 0.10798095 | -4.3558934 | 5.67E-05   |
| FIG01047911: hypothetical protein                                                                                                     | 641.470189 | -0.4703724 | 0.11270884 | -4.1733403 | 0.00012086 |
| MchD protein                                                                                                                          | 2243.11537 | -0.4709233 | 0.16627164 | -2.8322526 | 0.01182656 |
| Protein ydJA                                                                                                                          | 3368.74144 | -0.4709917 | 0.12450755 | -3.7828363 | 0.00055195 |
| Methylglyoxal synthase                                                                                                                | 3268.20798 | -0.4717094 | 0.10730838 | -4.3958301 | 4.79E-05   |
| Mlc%2C transcriptional repressor of MalT (the transcriptional activator of maltose regulon) and manXYZ operon<br>hypothetical protein | 1071.92371 | -0.4725245 | 0.13486029 | -3.5038074 | 0.00148218 |
| Transcriptional regulator%2C LacI family                                                                                              | 324.87586  | -0.472536  | 0.16554602 | -2.8544089 | 0.01109829 |
| N-acetylmuramic acid 6-phosphate etherase                                                                                             | 2390.40486 | -0.4729113 | 0.11069269 | -4.2722907 | 8.07E-05   |
| Methyl-accepting chemotaxis protein II (aspartate chemoreceptor protein)                                                              | 820.860181 | -0.4735778 | 0.09370171 | -5.0541004 | 2.28E-06   |
| 2-Keto-3-deoxy-D-manno-octulosonate-8-phosphate synthase                                                                              | 23040.0907 | -0.4737204 | 0.11666938 | -4.0603662 | 0.00019205 |
| Mediator of hyperadherence YidE                                                                                                       | 11061.7309 | -0.4737644 | 0.06608328 | -7.1692015 | 7.21E-12   |
| Ascorbate utilization transcriptional regulator UlaR%2C HTH-type                                                                      | 1060.17007 | -0.4740934 | 0.13923798 | -3.4049414 | 0.00206954 |
| Transport ATP-binding protein CytC                                                                                                    | 732.906229 | -0.4746337 | 0.10789468 | -4.3990465 | 4.72E-05   |
| FIG003276: zinc-binding protein                                                                                                       | 4460.87424 | -0.4746821 | 0.08824567 | -5.3790976 | 4.26E-07   |
| Glycosamine--fructose-6-phosphate aminotransferase [isomerizing]                                                                      | 580.661343 | -0.475268  | 0.11472613 | -4.1426308 | 0.00013708 |
| Bis[5'-nucleosyl]-tetraphosphatase%2C symmetrical                                                                                     | 13851.4019 | -0.4756932 | 0.07833372 | -6.0726495 | 8.78E-09   |
| Ribonuclease Z                                                                                                                        | 3668.67905 | -0.4758718 | 0.10542281 | -4.5139356 | 2.91E-05   |
| Arabinose operon regulatory protein                                                                                                   | 306.576666 | -0.4774074 | 0.14869066 | -3.2107424 | 0.00387592 |
|                                                                                                                                       | 2083.8588  | -0.4775154 | 0.10451829 | -4.568726  | 2.26E-05   |

|                                                                                                                                     |            |            |            |            |            |
|-------------------------------------------------------------------------------------------------------------------------------------|------------|------------|------------|------------|------------|
| Sensor protein torS                                                                                                                 | 778.743386 | -0.4777958 | 0.13290989 | -3.5948856 | 0.0010843  |
| S-adenosylmethionine decarboxylase preenzyme                                                                                        | 4064.66937 | -0.4785076 | 0.16375188 | -2.9221504 | 0.00916727 |
| Cytochrome c-type biogenesis protein CcmC%2Cputative heme lyase for CcmE                                                            | 129.117235 | -0.4785705 | 0.18795225 | -2.5462343 | 0.0253403  |
| tRNA (Guanine37-N1)-methyltransferase                                                                                               | 18174.5618 | -0.4788255 | 0.1358483  | -3.5247076 | 0.00138229 |
| Exodeoxyribonuclease V alpha chain                                                                                                  | 2450.77665 | -0.4789626 | 0.08475536 | -5.6511185 | 9.76E-08   |
| Transcriptional (co)regulator CytR                                                                                                  | 1762.3114  | -0.4790587 | 0.09393534 | -5.0998771 | 1.82E-06   |
| Polyferredoxin NapH (periplasmic nitrate reductase)                                                                                 | 78.1012794 | -0.4794911 | 0.20729466 | -2.3130896 | 0.04441119 |
| Riboflavin synthase eubacterial/eukaryotic                                                                                          | 4126.78363 | -0.4797094 | 0.1261824  | -3.8017141 | 0.00051659 |
| Outer membrane protein H precursor                                                                                                  | 23397.6032 | -0.4798138 | 0.13287058 | -3.6111367 | 0.00102581 |
| hypothetical protein                                                                                                                | 1529.34286 | -0.4802717 | 0.10320151 | -4.6537277 | 1.55E-05   |
| ABC transporter%2C periplasmic substrate-binding protein YnjB                                                                       | 789.444579 | -0.4821    | 0.12070583 | -3.9940075 | 0.0002509  |
| Cystathionine beta-lyase                                                                                                            | 1284.32814 | -0.482689  | 0.10870169 | -4.4404919 | 3.98E-05   |
| Fructose-1%2C6-bisphosphatase%2C type I                                                                                             | 7890.05491 | -0.4837766 | 0.07224187 | -6.6966234 | 1.82E-10   |
| Iron(III) dicitrate transport protein FecA                                                                                          | 15653.4818 | -0.4840072 | 0.12850542 | -3.7664345 | 0.00058684 |
| Putative transport protein                                                                                                          | 194.371061 | -0.4851756 | 0.16357836 | -2.9660131 | 0.00807744 |
| Transcription-repair coupling factor                                                                                                | 7508.85603 | -0.4855394 | 0.11575108 | -4.1946858 | 0.00011116 |
| Putative transport protein YdjK%2C MFS superfamily                                                                                  | 76.892217  | -0.4872058 | 0.20188072 | -2.4133347 | 0.03525899 |
| TorCAD operon transcriptional regulatory protein TorR                                                                               | 609.840314 | -0.4873402 | 0.10891167 | -4.4746367 | 3.45E-05   |
| FMN-dependent NADH-azoreductase                                                                                                     | 1463.87565 | -0.4880808 | 0.09901894 | -4.9291661 | 4.21E-06   |
| Penicillin-binding protein AmpH                                                                                                     | 1839.90298 | -0.4882716 | 0.07741782 | -6.306967  | 2.13E-09   |
| Holliday junction DNA helicase RuvB                                                                                                 | 3272.75552 | -0.4894642 | 0.07840331 | -6.2429024 | 3.13E-09   |
| Periplasmic nitrate reductase precursor                                                                                             | 358.650724 | -0.4899175 | 0.16510398 | -2.9673268 | 0.00804756 |
| Capsular polysaccharide export system protein KpsC                                                                                  | 5854.55923 | -0.4900625 | 0.17055979 | -2.8732595 | 0.01052583 |
| FIG00640332: hypothetical protein                                                                                                   | 127.164392 | -0.4902008 | 0.21150259 | -2.3177059 | 0.04396974 |
| ABC-type multidrug transport system%2C permease component                                                                           | 2952.67401 | -0.4908989 | 0.11285851 | -4.3496842 | 5.82E-05   |
| Glutathione S-transferase                                                                                                           | 4511.97447 | -0.4919468 | 0.11198041 | -4.393151  | 4.84E-05   |
| TIORF127 protein                                                                                                                    | 354.806725 | -0.4919508 | 0.12971643 | -3.7925099 | 0.0005341  |
| SSU ribosomal protein S3p (S3e)                                                                                                     | 33795.3096 | -0.4930963 | 0.10700551 | -4.6081395 | 1.90E-05   |
| Threonyl-tRNA synthetase                                                                                                            | 92360.4817 | -0.4951913 | 0.1146257  | -4.3200722 | 6.60E-05   |
| Formamidyrimidine-DNA glycosylase                                                                                                   | 604.634534 | -0.4972245 | 0.11341452 | -4.3841344 | 5.03E-05   |
| Xanthine and CO dehydrogenases maturation factor%2CXdhC/CoxF family / Selenium-dependent molybdenum hydroxylase system protein YqeB | 409.242346 | -0.4978564 | 0.14054556 | -3.5423129 | 0.00130221 |
| Iron(III) dicitrate transport system permease protein FecD (TC 3.A.1.14.1)                                                          | 918.825414 | -0.4986666 | 0.11507966 | -4.3332301 | 6.25E-05   |
| Uncharacterized sigma-54-dependent transcriptional regulator YgeV                                                                   | 823.236606 | -0.5004602 | 0.14277622 | -3.5052068 | 0.00147642 |
| Glycerol dehydrogenase                                                                                                              | 17512.7792 | -0.5008253 | 0.10285621 | -4.8691792 | 5.60E-06   |
| Phage DNA-packaging protein                                                                                                         | 388.082906 | -0.5008703 | 0.17055574 | -2.936696  | 0.00879222 |
| FIG003671: Metal-dependent hydrolase                                                                                                | 82.9734432 | -0.501141  | 0.20827805 | -2.4061151 | 0.03581163 |
| SSU ribosomal protein S16p                                                                                                          | 2445.46368 | -0.5024363 | 0.17085769 | -2.9406712 | 0.00869479 |
| Capsular polysaccharide export system protein KpsF                                                                                  | 10152.441  | -0.5027394 | 0.11297362 | -4.4500601 | 3.83E-05   |
| Dipeptidyl carboxypeptidase Dcp                                                                                                     | 3758.85244 | -0.5029956 | 0.11359666 | -4.4279084 | 4.21E-05   |
| Glucokinase                                                                                                                         | 2103.58563 | -0.5032149 | 0.0775756  | -6.4867677 | 6.94E-10   |
| Methionine ABC transporter ATP-binding protein                                                                                      | 6189.37643 | -0.5039581 | 0.10661797 | -4.7267649 | 1.10E-05   |
| LSU ribosomal protein L16p (L10e)                                                                                                   | 18696.9938 | -0.5045653 | 0.1032056  | -4.8889336 | 5.09E-06   |
| hypothetical protein                                                                                                                | 302.911221 | -0.5049905 | 0.1911016  | -2.6425235 | 0.01977235 |
| Adenylosuccinate lyase                                                                                                              | 4942.58974 | -0.5055886 | 0.13324126 | -3.7945344 | 0.00053048 |
| FIG002842: hypothetical protein                                                                                                     | 2474.9509  | -0.5063496 | 0.10405014 | -4.8664001 | 5.67E-06   |
| Aerotaxis sensor receptor protein                                                                                                   | 1996.95781 | -0.5063611 | 0.13077977 | -3.8718608 | 0.00039796 |
| LSU ribosomal protein L1p (L12e)                                                                                                    | 9784.08794 | -0.5064133 | 0.13925685 | -3.6365415 | 0.00093645 |
| hypothetical protein                                                                                                                | 2060.79711 | -0.5071157 | 0.11618968 | -4.3645499 | 5.47E-05   |
| Putative cytoplasmic protein                                                                                                        | 1005.76985 | -0.5076572 | 0.16767222 | -3.0276766 | 0.00676285 |
| Putative ACR protein                                                                                                                | 705.979496 | -0.508784  | 0.16583308 | -3.0680486 | 0.00600677 |
| Tyrosyl-tRNA synthetase                                                                                                             | 8411.55489 | -0.5093193 | 0.08355678 | -6.0954875 | 7.66E-09   |
| Ribonucleotide reductase of class Ia (aerobic)%2Cbeta subunit                                                                       | 4606.18513 | -0.5103178 | 0.11669791 | -4.3729815 | 5.28E-05   |
| HigA protein (antitoxin to HigB)                                                                                                    | 707.123985 | -0.5129284 | 0.11306673 | -4.5365101 | 2.62E-05   |
| Protein yIfE                                                                                                                        | 1321.44679 | -0.5134958 | 0.14602547 | -3.5164812 | 0.0014229  |
| FIG004064: hypothetical protein                                                                                                     | 9626.60282 | -0.5139996 | 0.11683823 | -4.3992414 | 4.72E-05   |
| Phosphoglucosamine mutase                                                                                                           | 9629.23157 | -0.5141156 | 0.11415319 | -4.5037337 | 3.04E-05   |
| Bacteriophage N4 adsorption protein A                                                                                               | 2329.037   | -0.5146692 | 0.10641129 | -4.836603  | 6.55E-06   |
| Outer membrane vitamin B12 receptor Btub                                                                                            | 8545.61909 | -0.5153964 | 0.13383546 | -3.85097   | 0.00043081 |
| FIG00640016: hypothetical protein                                                                                                   | 669.879632 | -0.5160682 | 0.1419084  | -3.636629  | 0.00093645 |
| Hydrogenase-2 large chain precursor                                                                                                 | 2334.17481 | -0.5173788 | 0.13085317 | -3.9538882 | 0.00029289 |
| Transcriptional regulator SlyA                                                                                                      | 1835.25365 | -0.5184043 | 0.13208207 | -3.9248649 | 0.00032532 |
| Acetoacetate metabolism regulatory protein Atoc                                                                                     | 179.230368 | -0.5186723 | 0.16666148 | -3.1121308 | 0.00525252 |
| Dihydroterpate synthase                                                                                                             | 1254.15607 | -0.5190929 | 0.11581451 | -4.4821054 | 3.34E-05   |
| Branched-chain amino acid ABC transporter%2C amino acid-binding protein (TC 3.A.1.4.1)                                              | 1353.61729 | -0.5191631 | 0.15316395 | -3.3895908 | 0.00217866 |
| 2-amino-3-ketobuturate coenzyme A ligase                                                                                            | 13651.1423 | -0.5194126 | 0.10630762 | -4.8859397 | 5.16E-06   |
| Putative transcriptional regulator of sorbose uptake and utilization genes                                                          | 335.138127 | -0.5215198 | 0.12810688 | -4.0709742 | 0.00018381 |
| 3-hydroxydecanoyl-[ACP] dehydratase                                                                                                 | 1062.58846 | -0.522801  | 0.13311916 | -3.9273161 | 0.00032272 |
| Phosphodiesterase yfC                                                                                                               | 961.783167 | -0.5235924 | 0.1175027  | -4.456003  | 3.73E-05   |
| FrmR: Negative transcriptional regulator of formaldehyde detoxification operon                                                      | 505.600498 | -0.5249336 | 0.13493694 | -3.890214  | 0.00037135 |
| L-fucose mutarotase                                                                                                                 | 3809.67486 | -0.5260364 | 0.09923652 | -5.3008351 | 6.51E-07   |
| PTS system%2C glucose-specific IIA component                                                                                        | 19080.9816 | -0.5273279 | 0.11358432 | -4.6426116 | 1.62E-05   |
| Dihydrodipicolinate synthase                                                                                                        | 9262.60804 | -0.5275699 | 0.12558764 | -4.2008107 | 0.00010838 |
| Protein-(N5)-glutamine methyltransferase PfmB%2Cmethylates LSU ribosomal protein L3p                                                | 2529.54564 | -0.5286671 | 0.08610131 | -6.1400583 | 5.89E-09   |
| LSU ribosomal protein L13p (L13Ae)                                                                                                  | 9392.62939 | -0.5292344 | 0.10040222 | -5.2711428 | 7.61E-07   |
| Mannitol-1-phosphate 5-dehydrogenase                                                                                                | 2658.40689 | -0.5295694 | 0.08928631 | -5.9311369 | 1.99E-08   |
| DNA gyrase inhibitory protein                                                                                                       | 617.099748 | -0.5297689 | 0.13386144 | -3.9575917 | 0.00028864 |
| L-lysine 6-monoxygenase [NADPH]                                                                                                     | 139483.052 | -0.5311288 | 0.11817663 | -4.494364  | 3.17E-05   |
| ErpA%2C essential respiratory protein A / probable iron binding protein from the HesB_iscA_SufA family                              | 5851.94694 | -0.5323746 | 0.13797031 | -3.858617  | 0.00041852 |
| Hydroxyethylthiazole kinase                                                                                                         | 6565.41323 | -0.532825  | 0.13949471 | -3.819679  | 0.00048369 |
| DUF1706 domain-containing protein                                                                                                   | 4300.91571 | -0.5335436 | 0.10424987 | -5.1179312 | 1.67E-06   |
| FIG00638396: hypothetical protein                                                                                                   | 1228.21598 | -0.5341966 | 0.17484444 | -3.0553204 | 0.00625294 |
| Exonuclease SbcD                                                                                                                    | 667.041063 | -0.5343666 | 0.14036254 | -3.8070457 | 0.00050752 |
| Hypothetical zinc-type alcohol dehydrogenase-like protein YdjJ                                                                      | 84.694312  | -0.53511   | 0.18907427 | -2.8301575 | 0.01189785 |
| N-acetylmannosamine kinase                                                                                                          | 108.859999 | -0.5359963 | 0.22928995 | -2.3376352 | 0.04207637 |
| Methionine aminopeptidase                                                                                                           | 9832.50247 | -0.5363208 | 0.08978363 | -5.9734804 | 1.55E-08   |
| Maltodextrin glucohydrolase                                                                                                         | 1540.25758 | -0.536794  | 0.11429439 | -4.6965912 | 1.27E-05   |
| Mobile element protein                                                                                                              | 303.607557 | -0.5382769 | 0.12115187 | -4.442993  | 3.94E-05   |
| Excinuclease ABC subunit A                                                                                                          | 36502.1678 | -0.5387039 | 0.10656372 | -5.0552282 | 2.27E-06   |
| Nitrate/nitrite sensor protein                                                                                                      | 764.767813 | -0.5391063 | 0.13443685 | -4.0101079 | 0.00023574 |
| DNA repair protein RecN                                                                                                             | 13604.9287 | -0.5394997 | 0.08645189 | -6.2404617 | 3.18E-09   |
| Protein ydgH precursor                                                                                                              | 5026.57596 | -0.5395376 | 0.07850348 | -6.8727857 | 5.66E-11   |
| FIG00638797: hypothetical protein                                                                                                   | 2433.17171 | -0.5400839 | 0.12287876 | -4.3952583 | 4.79E-05   |
| FIG00639029: hypothetical protein                                                                                                   | 357.682568 | -0.5408283 | 0.18857838 | -2.8679232 | 0.01068161 |
| Chromosome segregation ATPase                                                                                                       | 7268.51676 | -0.5410518 | 0.13628769 | -3.9699243 | 0.00027586 |
| Erythritol transcriptional regulator EryD                                                                                           | 4812.48045 | -0.5412535 | 0.08775529 | -6.1677595 | 4.97E-09   |
| FIG002208: Acetyltransferase                                                                                                        | 1879.76104 | -0.5417021 | 0.12807451 | -4.2295853 | 9.64E-05   |
| Putative inner membrane protein                                                                                                     | 3144.22697 | -0.5471028 | 0.12217927 | -4.4778694 | 3.40E-05   |
| Type I restriction-modification system%2CDNA-methyltransferase subunit M                                                            | 2098.15473 | -0.5472134 | 0.12275317 | -4.4578356 | 3.71E-05   |
| Inosine-uridine preferring nucleoside hydrolase                                                                                     | 329.046266 | -0.5472169 | 0.14189336 | -3.8565366 | 0.00042177 |
| Fumarate respiration transcriptional regulator DcuR                                                                                 | 1060.32429 | -0.5473051 | 0.11171984 | -4.8989069 | 4.86E-06   |
| Proteinase inhibitor I1%2C ecotin precursor                                                                                         | 1077.57193 | -0.5484334 | 0.08068905 | -6.7968751 | 9.31E-11   |
| Putative transporting ATPase                                                                                                        | 706.206567 | -0.5489009 | 0.14912366 | -3.6808437 | 0.00080043 |
| Quinolinate phosphoribosyltransferase [decarboxylating]                                                                             | 2580.41858 | -0.5498884 | 0.08703478 | -6.3180307 | 1.99E-09   |
| Transcriptional repressor of the lac operon                                                                                         | 1355.84104 | -0.5508021 | 0.11256139 | -4.8933489 | 4.98E-06   |
| entry exclusion protein 2                                                                                                           | 1490.89522 | -0.5512349 | 0.12374818 | -4.454489  | 3.75E-05   |
| FIG001826: putative inner membrane protein                                                                                          | 167.756387 | -0.5521086 | 0.16804259 | -3.2855279 | 0.00305568 |
| Phage portal protein                                                                                                                | 428.141828 | -0.55251   | 0.17701335 | -3.12129   | 0.00510712 |

|                                                                                                     |            |            |            |            |            |
|-----------------------------------------------------------------------------------------------------|------------|------------|------------|------------|------------|
| Ribonucleotide reductase of class Ia (aerobic)%2Ca1pha subunit                                      | 5551.17648 | -0.5525486 | 0.12686074 | -4.355552  | 5.67E-05   |
| Head-tail preconnector protein GP5                                                                  | 2435.35773 | -0.553364  | 0.18072041 | -3.0619896 | 0.00611888 |
| Fur regulated protein ORF x171.28                                                                   | 197.843376 | -0.5552938 | 0.18798159 | -2.9539798 | 0.00835192 |
| entry exclusion protein 2                                                                           | 834.667474 | -0.5568993 | 0.13375299 | -4.1636401 | 0.0001259  |
| Transcriptional activator of maltose regulon%2CMAIt                                                 | 5963.24059 | -0.5588519 | 0.10937053 | -5.1097121 | 1.74E-06   |
| Flavo-hemoprotein (Hemoglobin-like protein) (Flavo-hemoglobin) (Nitric oxide dioxygenase)           | 1126.08788 | -0.5618573 | 0.12745896 | -4.4081428 | 4.56E-05   |
| Ferredoxin reductase                                                                                | 928.931979 | -0.5622011 | 0.10326252 | -5.4443866 | 2.99E-07   |
| Phosphoanhydride phosphohydrolase                                                                   | 810.741998 | -0.5630996 | 0.13009986 | -4.3282105 | 6.37E-05   |
| Phosphomethylpyrimidine kinase                                                                      | 5062.35669 | -0.5641394 | 0.14362187 | -3.927949  | 0.00032245 |
| SSU ribosomal protein S19p (S15e)                                                                   | 3507.0428  | -0.566943  | 0.13066978 | -4.3387463 | 6.10E-05   |
| S-(hydroxymethyl)glutathione dehydrogenase                                                          | 4508.01248 | -0.5675033 | 0.10956961 | -5.179386  | 1.22E-06   |
| hypothetical protein                                                                                | 165.384667 | -0.5675972 | 0.18045508 | -3.1453656 | 0.00475621 |
| Carbon starvation protein A                                                                         | 13107.6434 | -0.5685966 | 0.11711199 | -4.8551523 | 6.00E-06   |
| Cys-tRNA(Pro) deacylase YbaK                                                                        | 1019.35765 | -0.5691285 | 0.10473131 | -5.434177  | 3.16E-07   |
| Aspartokinase                                                                                       | 4104.36463 | -0.5699102 | 0.18423798 | -3.0933372 | 0.00557023 |
| Fumarate reductase subunit D                                                                        | 1030.50564 | -0.5700543 | 0.11365425 | -5.0156883 | 2.75E-06   |
| Pyrraline-5-carboxylate reductase                                                                   | 3349.50432 | -0.5712518 | 0.0964613  | -5.9222035 | 2.09E-08   |
| Putative permease PerM (%3D YfgO)                                                                   | 889.997444 | -0.5727061 | 0.11907949 | -4.8094439 | 7.44E-06   |
| Nickel transport ATP-binding protein NikD (TC 3.A.1.5.3)                                            | 49.1094886 | -0.574093  | 0.23315311 | -2.4623006 | 0.03129418 |
| Acetolactate synthase large subunit                                                                 | 5429.01021 | -0.5753006 | 0.08689265 | -6.6208193 | 2.95E-10   |
| YjiD protein                                                                                        | 223.133089 | -0.5756165 | 0.16750022 | -3.4365117 | 0.001861   |
| Multidrug resistance protein D                                                                      | 545.239569 | -0.5759044 | 0.12884181 | -4.4698566 | 3.52E-05   |
| hypothetical protein                                                                                | 1819.3547  | -0.5779523 | 0.10786288 | -5.3582136 | 4.77E-07   |
| Methylglyoxal reductase%2C acetol producing                                                         | 111.813246 | -0.5781043 | 0.21353617 | -2.7072896 | 0.01671498 |
| PTS system%2C fructose-specific IIb component                                                       | 5216.31723 | -0.5784728 | 0.14207419 | -4.071625  | 0.00018345 |
| Dihydropicolinate synthase                                                                          | 374.982389 | -0.5826521 | 0.10518841 | -5.5391278 | 1.78E-07   |
| LrgA-associated membrane protein LrgB                                                               | 1978.47082 | -0.5832103 | 0.21601419 | -2.6998703 | 0.01703909 |
| 6-phosphofructokinase                                                                               | 25614.2684 | -0.5835663 | 0.07778904 | -7.5019088 | 6.60E-13   |
| FIG01200701: hypothetical protein                                                                   | 511.264136 | -0.583653  | 0.18009352 | -3.2408327 | 0.00351744 |
| PTS system%2C fructose-specific IIc component                                                       | 199.34071  | -0.5838665 | 0.13217528 | -4.4173657 | 4.40E-05   |
| Holliday junction DNA helicase RuvA                                                                 | 2101.0414  | -0.5840377 | 0.09557186 | -6.1109793 | 6.98E-09   |
| FIG00638471: hypothetical protein                                                                   | 1995.99233 | -0.5851605 | 0.13200375 | -4.432908  | 4.11E-05   |
| Non-specific DNA-binding protein Dps / Iron-binding ferritin-like antioxidant protein / Ferroxidase | 10756.2503 | -0.5852385 | 0.12196535 | -4.7983999 | 7.86E-06   |
| DUF1706 domain-containing protein                                                                   | 7065.72547 | -0.5860386 | 0.19566564 | -2.9951021 | 0.00742118 |
| Ferrous iron transport protein A                                                                    | 3754.79905 | -0.5863397 | 0.13289269 | -4.4121287 | 4.49E-05   |
| Ribosyl nicotinamide transporter%2C PnuC-like                                                       | 33778.2906 | -0.5866094 | 0.08304701 | -7.0635821 | 1.52E-11   |
| D-Lactate dehydrogenase                                                                             | 11885.1133 | -0.587441  | 0.09308523 | -6.3107867 | 2.08E-09   |
| Putative transport protein                                                                          | 1031.53021 | -0.5900648 | 0.10614898 | -5.5883364 | 1.60E-07   |
| Cytochrome c-type biogenesis protein CcmE%2C heme chaperone                                         | 146.387475 | -0.5914203 | 0.1655527  | -3.5723992 | 0.0011719  |
| Accessory protein YqcC in selenium-dependent molybdenum hydroxylase maturation                      | 78.9338204 | -0.5916393 | 0.20349843 | -2.9073406 | 0.00955945 |
| Ferredoxin reductase                                                                                | 1129.68803 | -0.5917884 | 0.11846114 | -4.995633  | 3.04E-06   |
| Glucose-6-phosphate 1-dehydrogenase                                                                 | 9540.69505 | -0.5940164 | 0.09287846 | -6.3956313 | 1.24E-09   |
| Putative transport system permease protein                                                          | 405.132917 | -0.5957536 | 0.12104475 | -4.9217636 | 4.36E-06   |
| Ferrous iron transport peroxidase EfeB                                                              | 18020.561  | -0.5958808 | 0.15673362 | -3.8018701 | 0.00051659 |
| Putative minor tail protein                                                                         | 972.191993 | -0.5975803 | 0.17676688 | -3.3806124 | 0.00223493 |
| Prolyl-tRNA synthetase                                                                              | 13291.7549 | -0.5981949 | 0.09459244 | -6.3239185 | 1.93E-09   |
| FIG00639467: hypothetical protein                                                                   | 377.001588 | -0.599287  | 0.15844008 | -3.7824206 | 0.00055246 |
| Phosphoserine aminotransferase                                                                      | 21416.0286 | -0.6003754 | 0.08359822 | -7.1816767 | 6.66E-12   |
| Glutathionylspermidine synthase                                                                     | 16954.8424 | -0.6004704 | 0.09831551 | -6.1075857 | 7.12E-09   |
| Probable lipoprotein                                                                                | 130.279924 | -0.60157   | 0.17038011 | -3.5307523 | 0.00135295 |
| 3-oxoacyl-[acyl-carrier protein] reductase                                                          | 2024.96428 | -0.6017974 | 0.09363071 | -6.4273507 | 1.01E-09   |
| Phage minor tail protein                                                                            | 155.938177 | -0.6035673 | 0.22637143 | -2.6662699 | 0.0185986  |
| COG0699: Predicted GTPases (dynamin-related)                                                        | 755.629367 | -0.6035707 | 0.09397075 | -6.4229638 | 1.04E-09   |
| RNA polymerase sigma factor RpoD                                                                    | 16498.6546 | -0.6039855 | 0.07580066 | -7.9680773 | 1.95E-14   |
| Glucitol operon repressor                                                                           | 367.183334 | -0.6071146 | 0.13184843 | -4.6046405 | 1.93E-05   |
| Transposase EC0136                                                                                  | 185.990575 | -0.6075486 | 0.17543919 | -3.4630156 | 0.0016949  |
| FIG00644994: hypothetical protein                                                                   | 4369.86925 | -0.6091182 | 0.107797   | -5.650604  | 9.76E-08   |
| FIG00642515: hypothetical protein                                                                   | 1488.49911 | -0.6092034 | 0.10691899 | -5.6978035 | 7.52E-08   |
| 2'-5' RNA ligase                                                                                    | 771.983591 | -0.6107706 | 0.10368865 | -5.8904286 | 2.51E-08   |
| Transaldolase                                                                                       | 345.839422 | -0.6108917 | 0.15486844 | -3.9445849 | 0.00030352 |
| Phage minor tail protein                                                                            | 120.440326 | -0.6114181 | 0.20092867 | -3.0429612 | 0.00648126 |
| Antiholin-like protein LrgA                                                                         | 742.6495   | -0.6116105 | 0.14648185 | -4.1753333 | 0.00011992 |
| Phage tail assembly                                                                                 | 713.0358   | -0.613624  | 0.16879448 | -3.635332  | 0.00094018 |
| 16 kDa heat shock protein B                                                                         | 630.274433 | -0.6140035 | 0.17328456 | -3.5433248 | 0.00129812 |
| Vitamin B12 ABC transporter%2C B12-binding component BtuF                                           | 1184.99019 | -0.6154026 | 0.15274663 | -4.028911  | 0.00021837 |
| HtrA protease/chaperone protein                                                                     | 17694.1874 | -0.6173889 | 0.09268019 | -6.6614986 | 2.29E-10   |
| Capsular polysaccharide export system protein Kps5                                                  | 951.302347 | -0.6176979 | 0.18774635 | -3.2900664 | 0.00301064 |
| Intergen-region protein                                                                             | 239.633069 | -0.619148  | 0.16963762 | -3.6498271 | 0.00089574 |
| FIG00637865: hypothetical protein                                                                   | 1374.40549 | -0.6208781 | 0.20422594 | -3.0401531 | 0.00653055 |
| DNA polymerase III epsilon subunit                                                                  | 2877.67808 | -0.6211801 | 0.09355811 | -6.6395114 | 2.63E-10   |
| Putative phage protein                                                                              | 62.0301325 | -0.6212931 | 0.25116918 | -2.473604  | 0.03043812 |
| Predicted glutamine amidotransferase                                                                | 4199.66859 | -0.6228765 | 0.10150527 | -6.1363962 | 6.01E-09   |
| Spermidine synthase                                                                                 | 4179.86898 | -0.6239152 | 0.12873914 | -4.8463521 | 6.26E-06   |
| 3-demethylubiquinone-9 3-methyltransferase                                                          | 375.080056 | -0.6253969 | 0.12977439 | -4.8191085 | 7.11E-06   |
| Putative membrane protein YeiH                                                                      | 372.552848 | -0.6259942 | 0.12127594 | -5.1617343 | 1.34E-06   |
| OsmC/Dhr family protein                                                                             | 540.724382 | -0.626139  | 0.13969341 | -4.4822373 | 3.34E-05   |
| Cell division protein FtsZ                                                                          | 51944.9713 | -0.6269096 | 0.11949897 | -5.2461505 | 8.63E-07   |
| FIG00361523: hypothetical protein                                                                   | 3897.38635 | -0.6270525 | 0.08205957 | -7.6414301 | 2.39E-13   |
| Phosphogluconate repressor HexR%2C RpiR family                                                      | 631.812195 | -0.6288155 | 0.12585342 | -4.9964118 | 3.03E-06   |
| Sigma cross-reacting protein 27A                                                                    | 3920.44544 | -0.6302659 | 0.10298138 | -6.1201932 | 6.62E-09   |
| Transcriptional regulatory protein RtcR                                                             | 305.327153 | -0.6304822 | 0.16611312 | -3.7954989 | 0.00052891 |
| Ribosome recycling factor                                                                           | 15187.9073 | -0.6311384 | 0.07144842 | -8.833483  | 1.54E-17   |
| Porphobilinogen synthase                                                                            | 8926.48944 | -0.6312425 | 0.09481986 | -6.6572808 | 2.35E-10   |
| Z1226 protein                                                                                       | 103.009673 | -0.6321083 | 0.17543422 | -3.6031075 | 0.00105354 |
| Fructuronate transporter GntP                                                                       | 153.247327 | -0.6321382 | 0.16457533 | -3.8410264 | 0.00044691 |
| Ribonuclease E inhibitor RraB                                                                       | 2897.27743 | -0.6329538 | 0.12484646 | -5.0698579 | 2.11E-06   |
| COG1649 predicted glycoside hydrolase                                                               | 705.072632 | -0.6344519 | 0.13180965 | -4.8133952 | 7.31E-06   |
| FIG00639173: hypothetical protein                                                                   | 806.086854 | -0.6352641 | 0.14563815 | -4.3619344 | 5.52E-05   |
| Aerobic C4-dicarboxylate transporter for fumarate%2C L-malate%2C D-malate%2C succinate%2C aspartate | 653.595476 | -0.6376153 | 0.19557856 | -3.2601494 | 0.00330913 |
| FKBP-type peptidyl-prolyl cis-trans isomerase SfpA                                                  | 2288.79927 | -0.6378566 | 0.10202516 | -6.2519538 | 2.96E-09   |
| Putative amidohydrolase                                                                             | 480.334776 | -0.6384275 | 0.12117509 | -5.2686361 | 7.70E-07   |
| Phage capsid and scaffold                                                                           | 550.749376 | -0.6405219 | 0.16630298 | -3.8515357 | 0.00043015 |
| Sodium-dicarboxylate symporter                                                                      | 19012.3499 | -0.640829  | 0.09196619 | -6.9680931 | 2.95E-11   |
| UFPO246 protein YaaA                                                                                | 1453.58823 | -0.6410915 | 0.11372265 | -5.6373245 | 1.05E-07   |
| Isoleucyl-tRNA synthetase                                                                           | 54149.0254 | -0.6412874 | 0.08794885 | -7.2915947 | 3.01E-12   |
| Sorbitol-6-phosphate 2-dehydrogenase                                                                | 111.177077 | -0.6413636 | 0.1708843  | -3.7532038 | 0.00061686 |
| Ni/Fe-hydrogenase 2 B-type cytochrome subunit                                                       | 562.208631 | -0.6415966 | 0.19623619 | -3.269512  | 0.00321771 |
| Adenylate kinase                                                                                    | 7079.1485  | -0.6420282 | 0.1128741  | -5.6880024 | 7.94E-08   |
| Formate dehydrogenase N gamma subunit                                                               | 196.312119 | -0.6433647 | 0.16723809 | -3.8469986 | 0.00043684 |
| Inosine-uridine preferring nucleoside hydrolase                                                     | 411.859433 | -0.6468226 | 0.14109578 | -4.5842804 | 2.11E-05   |
| Sensory histidine kinase AtoS                                                                       | 146.994387 | -0.6469391 | 0.18604439 | -3.4773373 | 0.00161883 |
| Ribulokinase                                                                                        | 161.048649 | -0.647233  | 0.16323841 | -3.9649556 | 0.00028099 |
| UDP-sugar hydrolase                                                                                 | 7001.92043 | -0.649285  | 0.09466918 | -6.8584616 | 6.23E-11   |
| Translation initiation factor SUI1-related protein                                                  | 313.050622 | -0.6495874 | 0.1631889  | -3.9805859 | 0.00026485 |
| Putative cytoplasmic protein                                                                        | 281.822693 | -0.6538246 | 0.14008702 | -4.6672749 | 1.45E-05   |
| Phage tail assembly protein I                                                                       | 137.534383 | -0.6594467 | 0.23179963 | -2.8448999 | 0.01140404 |
| Dihydropyrimidine dehydrogenase of pyruvate dehydrogenase complex                                   | 144339.799 | -0.6612822 | 0.10957006 | -6.0352453 | 1.08E-08   |



|                                                                                                 |            |            |            |            |            |
|-------------------------------------------------------------------------------------------------|------------|------------|------------|------------|------------|
| 6-phosphogluconate dehydrogenase%2Cdecarboxylating                                              | 21843.3358 | -0.6615538 | 0.10457963 | -6.3258382 | 1.91E-09   |
| 3-oxoacyl-[ACP] reductase                                                                       | 2369.81713 | -0.6644401 | 0.15406392 | -4.3127561 | 6.79E-05   |
| Putative Nudix hydrolase YfD                                                                    | 1535.6492  | -0.6654783 | 0.0798262  | -8.3365897 | 1.02E-15   |
| Modulator of drug activity B                                                                    | 530.32887  | -0.6661292 | 0.13238966 | -5.0315803 | 2.55E-06   |
| FIG004614: Putative cytoplasmic protein                                                         | 509.640288 | -0.6671579 | 0.11035967 | -6.0453048 | 1.02E-08   |
| putative regulator PapX protein                                                                 | 1374.20067 | -0.6672172 | 0.12040616 | -5.5413877 | 1.76E-07   |
| Mannose-6-phosphate isomerase                                                                   | 1720.02268 | -0.6677546 | 0.1186438  | -5.6282301 | 1.10E-07   |
| Dihydroorotase                                                                                  | 1457.81439 | -0.6682734 | 0.12245064 | -5.4574925 | 2.79E-07   |
| Predicted dye-decolorizing peroxidase (DyP)%2CYfe-like subgroup                                 | 1255.77172 | -0.6708771 | 0.10791513 | -6.2167101 | 3.68E-09   |
| membrane protein yaiZ                                                                           | 319.677932 | -0.6718479 | 0.16295911 | -4.1228003 | 0.00014818 |
| Phage major capsid protein                                                                      | 1752.70801 | -0.6728946 | 0.17118616 | -3.9307769 | 0.00031893 |
| Protein export cytoplasm protein SecA ATPase RNA helicase (TC 3.A.5.1.1)                        | 22613.7524 | -0.6745093 | 0.09576828 | -7.0431389 | 1.76E-11   |
| Amidophosphoribosyltransferase                                                                  | 4159.94331 | -0.676398  | 0.13589757 | -4.9772631 | 3.33E-06   |
| Ribosome hibernation protein YfiA                                                               | 13170.6609 | -0.6764397 | 0.13152726 | -5.1429622 | 1.47E-06   |
| Ribose-phosphate pyrophosphokinase                                                              | 12487.8322 | -0.6767974 | 0.09906369 | -6.8319428 | 7.42E-11   |
| Glutamyl-tRNA synthetase                                                                        | 4538.544   | -0.6772251 | 0.09093869 | -7.4470507 | 9.86E-13   |
| Putative acetyltransferase                                                                      | 79.6554176 | -0.6774106 | 0.24010742 | -2.8212816 | 0.01219496 |
| Putative transcriptional regulator of unknown carbohydrate utilization cluster%2C GntR family   | 118.170678 | -0.6775519 | 0.20926484 | -3.2377721 | 0.00355318 |
| L-arabinose isomerase                                                                           | 367.004771 | -0.679353  | 0.11817864 | -5.7485265 | 5.68E-08   |
| COG2005: N-terminal domain of molybdenum-binding protein                                        | 2773.54489 | -0.6804642 | 0.13908776 | -4.8923368 | 5.00E-06   |
| Fumarate reductase subunit C                                                                    | 727.743438 | -0.6809939 | 0.10848344 | -6.2773998 | 2.54E-09   |
| Type I restriction-modification system%2CSpecificity subunit S                                  | 1185.15108 | -0.6828094 | 0.13442554 | -5.0794617 | 2.01E-06   |
| Respiratory nitrate reductase alpha chain                                                       | 1206.90988 | -0.6841978 | 0.1720068  | -3.9778785 | 0.00026723 |
| Nucleoside-specific channel-forming protein Txs precursor                                       | 2421.4595  | -0.6883158 | 0.13028307 | -5.2832329 | 7.13E-07   |
| Tagatose 1%2C6-bisphosphate aldolase                                                            | 122.833584 | -0.6883388 | 0.18634101 | -3.6999738 | 0.0007652  |
| Putative ribokinas                                                                              | 156.49024  | -0.6885595 | 0.1557436  | -4.4211097 | 4.33E-05   |
| Uncharacterized GST-like protein yghU associated with glutathionylpermeidase/synthetase/amidase | 2670.66433 | -0.688909  | 0.11667564 | -5.9044802 | 2.32E-08   |
| putative lipoprotein                                                                            | 3407.90695 | -0.6893312 | 0.10200342 | -6.7579223 | 1.21E-10   |
| Putative membrane protein                                                                       | 1732.7865  | -0.6909647 | 0.14874971 | -4.6451497 | 1.61E-05   |
| 3-dehydro-L-gulonate 2-dehydrogenase                                                            | 87.8475687 | -0.692432  | 0.21190874 | -3.2675955 | 0.00323549 |
| Thymidine phosphorylase                                                                         | 10975.2719 | -0.6934548 | 0.08886277 | -7.8036597 | 6.92E-14   |
| Ferrous iron transport protein B                                                                | 42525.8652 | -0.6935257 | 0.11649218 | -5.9534102 | 1.74E-08   |
| Pyridoxamine 5'-phosphate oxidase                                                               | 1918.26669 | -0.6940127 | 0.08897245 | -7.8003108 | 7.09E-14   |
| Putative integral membrane protein                                                              | 2184.48493 | -0.6952693 | 0.11950526 | -5.8178972 | 3.79E-08   |
| GDDEF/EAL domain protein YhjH                                                                   | 2752.12066 | -0.6955458 | 0.09740829 | -7.1405199 | 8.83E-12   |
| Anaerobic selenate reductase%2C molybdenum cofactor-containing periplasmic protein              | 458.154734 | -0.6965828 | 0.12170999 | -5.7233001 | 6.53E-08   |
| Hydrogenase-2 operon protein hybA precursor                                                     | 880.276404 | -0.6981621 | 0.19873802 | -3.5129769 | 0.00143982 |
| Inorganic pyrophosphatase                                                                       | 9505.86119 | -0.6997489 | 0.10689618 | -6.5460605 | 4.71E-10   |
| Acetolactate synthase small subunit                                                             | 1920.15187 | -0.700107  | 0.10369821 | -6.751389  | 1.26E-10   |
| iron aquisition regulator [YbaI%2CAraC-like%2Crequired for transcription of FyuA/psn%2Clrp2]    | 6424.89229 | -0.7011212 | 0.19217271 | -3.648391  | 0.00089881 |
| Putative two-component system sensor kinase                                                     | 281.18084  | -0.7047412 | 0.12660134 | -5.5666174 | 1.54E-07   |
| Glutaminase                                                                                     | 2895.5476  | -0.7049992 | 0.22056392 | -3.1963486 | 0.00404954 |
| SbmA protein                                                                                    | 2697.48515 | -0.7059441 | 0.13321107 | -5.2994403 | 6.55E-07   |
| Ferredoxin reductase                                                                            | 758.408028 | -0.7071691 | 0.09597141 | -7.3685391 | 1.71E-12   |
| Flagellar hook-associated protein FlID                                                          | 17466.2107 | -0.7081335 | 0.12873498 | -5.5007078 | 2.20E-07   |
| FIG01220476: hypothetical protein                                                               | 710.988409 | -0.7089504 | 0.14482772 | -4.8951296 | 4.94E-06   |
| Transcriptional antiterminator of lichen operon%2C BglG family                                  | 84.2898238 | -0.7090924 | 0.22360198 | -3.1712259 | 0.004387   |
| Alanine transaminase                                                                            | 4736.51157 | -0.7126748 | 0.10470821 | -6.8062933 | 8.76E-11   |
| Multimeric flavodoxin WrbA                                                                      | 122.483044 | -0.7140147 | 0.20710121 | -3.4476605 | 0.00179064 |
| RecA protein                                                                                    | 37899.4307 | -0.7146759 | 0.10872922 | -6.5729883 | 3.98E-10   |
| LSU ribosomal protein L19p                                                                      | 5252.92331 | -0.7161982 | 0.137066   | -5.2252066 | 9.65E-07   |
| Phosphoribosylglycinamide formyltransferase                                                     | 1370.33513 | -0.7167725 | 0.1568705  | -4.5691985 | 2.26E-05   |
| Superoxide dismutase [Fe]                                                                       | 2884.77281 | -0.7186732 | 0.13295301 | -5.4054682 | 3.70E-07   |
| D-galactarate dehydratase                                                                       | 300.082986 | -0.7193817 | 0.16672494 | -4.3147819 | 6.73E-05   |
| FIG001196: Membrane protein YedZ                                                                | 10569.4392 | -0.7198679 | 0.16619668 | -4.3314216 | 6.29E-05   |
| Aspartate-ammonia ligase                                                                        | 6313.54664 | -0.7200157 | 0.16114906 | -4.4680105 | 3.54E-05   |
| Inosine 5'-monophosphate dehydrogenase                                                          | 4296.54879 | -0.7208249 | 0.10898463 | -6.6140052 | 3.08E-10   |
| Exopolysaccharonate lyase                                                                       | 832.449183 | -0.7212485 | 0.1543033  | -4.6742259 | 1.41E-05   |
| Oligopeptide ABC transporter%2C periplasmic oligopeptide-binding protein OppA (TC 3.A.1.5.1)    | 501.008023 | -0.7215966 | 0.11512809 | -6.267772  | 2.69E-09   |
| YehQ protein                                                                                    | 525.331651 | -0.7229668 | 0.13766597 | -5.251601  | 8.42E-07   |
| Hypothetical flavoprotein YqC (clustered with tRNA pseudouridine synthase C)                    | 501.235472 | -0.7232397 | 0.18927764 | -3.821052  | 0.00048137 |
| PTS system%2C fructose-specific IIA component                                                   | 29.4332081 | -0.7233484 | 0.3035451  | -2.3830016 | 0.03778665 |
| Putative transcription factor                                                                   | 470.839016 | -0.724352  | 0.12845873 | -5.6387917 | 1.04E-07   |
| FIG138576: 3-oxoacyl-[ACP] synthase                                                             | 3798.55028 | -0.7278099 | 0.1650583  | -4.4094111 | 4.54E-05   |
| Aminoacyl-histidine dipeptidase (Peptidase D)                                                   | 53580.5849 | -0.729466  | 0.11021728 | -6.6184361 | 3.00E-10   |
| Aspartate aminotransferase                                                                      | 42884.9332 | -0.7300578 | 0.08864338 | -8.2358977 | 2.30E-15   |
| Transcriptional regulator%2C IcdR family                                                        | 179.746015 | -0.7302565 | 0.19635653 | -3.719032  | 0.00069671 |
| PTS system%2C glucitol/sorbitol-specific IIB component and second of two IIC components         | 40.9983805 | -0.7312097 | 0.24761779 | -2.9529771 | 0.00836968 |
| FIG0040497: hypothetical protein                                                                | 163.350279 | -0.7317069 | 0.18385604 | -3.9797816 | 0.00026553 |
| Uracil permease                                                                                 | 371.912185 | -0.7348375 | 0.16808457 | -4.3718321 | 5.30E-05   |
| probable membrane protein yjeI                                                                  | 1778.27197 | -0.7357762 | 0.16448878 | -4.4731086 | 3.47E-05   |
| Crotonobetaine carnitine-CoA ligase                                                             | 2034.15831 | -0.7371352 | 0.09060194 | -8.1359758 | 5.14E-15   |
| Formate dehydrogenase N beta subunit                                                            | 187.249855 | -0.7372416 | 0.17832936 | -4.1341571 | 0.00014175 |
| Inhibitor of vertebrate lysozyme precursor                                                      | 3179.05665 | -0.7373069 | 0.11127323 | -6.6260943 | 2.87E-10   |
| FIG00637942: hypothetical protein                                                               | 5105.33105 | -0.7382446 | 0.12163648 | -6.0692699 | 8.94E-09   |
| Outer membrane protein F precursor                                                              | 110512.768 | -0.7414895 | 0.14557497 | -5.0935234 | 1.88E-06   |
| FIG001943: hypothetical protein YajQ                                                            | 5513.31829 | -0.7439005 | 0.10463626 | -7.109395  | 1.10E-11   |
| Homoserine O-succinyltransferase                                                                | 1289.00869 | -0.7465429 | 0.15216865 | -4.9060232 | 4.69E-06   |
| Phosphoheptose isomerase 1                                                                      | 8537.45359 | -0.7485099 | 0.1170686  | -6.3937717 | 1.25E-09   |
| Uxu operon transcriptional regulator                                                            | 2758.95483 | -0.7491761 | 0.08585173 | -8.7263944 | 3.90E-17   |
| Succinate dehydrogenase iron-sulfur protein                                                     | 1756.59016 | -0.7511252 | 0.1020519  | -7.3602276 | 1.82E-12   |
| Cytochrome c551 peroxidase                                                                      | 203.022158 | -0.7514343 | 0.13627018 | -5.5142972 | 2.04E-07   |
| D-serine permease DsdX                                                                          | 129.438752 | -0.7516291 | 0.23329589 | -3.2217845 | 0.00374351 |
| Twin-arginine translocation protein TatE                                                        | 535.801272 | -0.7519424 | 0.22981415 | -3.2719585 | 0.00319201 |
| TonB-dependent receptor%3B Outer membrane receptor for ferric enterobactin and colicins B%2C D  | 102178.665 | -0.7546478 | 0.12722852 | -5.9314358 | 1.98E-08   |
| Inner membrane transport protein YbaT                                                           | 1836.10873 | -0.7552866 | 0.20186239 | -3.7415916 | 0.00064267 |
| Thiamin ABC transporter%2C transmembrane component                                              | 2699.25795 | -0.7553822 | 0.13566942 | -5.5678148 | 1.53E-07   |
| S-adenosylmethionine synthetase                                                                 | 21223.8462 | -0.755624  | 0.12421912 | -6.0829927 | 8.26E-09   |
| DUF1140 domain-containing membrane protein                                                      | 35902.9513 | -0.7560478 | 0.13822643 | -5.4696327 | 2.61E-07   |
| Deoxyribose-phosphate aldolase                                                                  | 5244.64917 | -0.7561967 | 0.09540015 | -7.9265782 | 2.71E-14   |
| Protein yihD                                                                                    | 1157.22962 | -0.7578382 | 0.15302874 | -4.9522607 | 3.77E-06   |
| PTS system%2C glucose-specific IIB component                                                    | 17074.4119 | -0.7582137 | 0.13659074 | -5.550989  | 1.67E-07   |
| Putative translation initiation inhibitor YoaB                                                  | 318.637153 | -0.7582152 | 0.15390743 | -4.9264367 | 4.26E-06   |
| Capsular polysaccharide ABC transporter%2CATP-binding protein KpsT                              | 4633.73979 | -0.7595521 | 0.1300942  | -5.8384779 | 3.37E-08   |
| UPF0265 protein YeeX                                                                            | 12917.4174 | -0.759713  | 0.09841632 | -7.7193803 | 1.31E-13   |
| FIG000875: Thioredoxin domain-containing protein Ec-YbbN                                        | 6097.65464 | -0.7625969 | 0.1151509  | -6.6225873 | 2.92E-10   |
| hypothetical protein                                                                            | 89.465888  | -0.7630408 | 0.29438239 | -2.5920054 | 0.02248126 |
| Uridine phosphorylase                                                                           | 13133.0057 | -0.7665297 | 0.09433753 | -8.1253953 | 5.58E-15   |
| ATPase component STY3233 of energizing module of queuosine-regulated ECF transporter            | 130.771498 | -0.7672177 | 0.22362635 | -3.430802  | 0.00189681 |
| Phage minor tail protein                                                                        | 119.039088 | -0.7691993 | 0.25424793 | -3.0253907 | 0.00680628 |
| [NiFe] hydrogenase metallocenter assembly protein HybG                                          | 192.927319 | -0.7703008 | 0.16586596 | -4.644116  | 1.61E-05   |
| Transcriptional regulator%2C TetR family                                                        | 1003.90423 | -0.7723908 | 0.14313589 | -5.3962059 | 3.89E-07   |
| Ribokinase                                                                                      | 1564.17296 | -0.7740285 | 0.12267893 | -6.3093846 | 2.10E-09   |
| Adenylate-forming enzyme                                                                        | 121.868583 | -0.7742295 | 0.22790215 | -3.3972014 | 0.00212035 |
| Glutamate synthase [NADPH] small chain                                                          | 368.848422 | -0.7766201 | 0.16478747 | -4.7128591 | 1.18E-05   |
| FIG00638119: hypothetical protein                                                               | 32.1716019 | -0.7790345 | 0.34016705 | -2.2901527 | 0.04693149 |
| N-acetylneuraminate lyase                                                                       | 48.313844  | -0.7799044 | 0.2573651  | -3.0303424 | 0.00671903 |

|                                                                                                                         |             |            |             |            |            |
|-------------------------------------------------------------------------------------------------------------------------|-------------|------------|-------------|------------|------------|
| Glucitol operon GutQ protein                                                                                            | 1038.01513  | -0.7808409 | 0.12431805  | -6.280994  | 2.49E-09   |
| Putative tail component of prophage CP-933K                                                                             | 290.507037  | -0.7813304 | 0.1864365   | -4.1908662 | 0.00011277 |
| GMP synthase [glutamine-hydrolyzing][%2Camidotransferase subunit                                                        | 6879.12571  | -0.7818537 | 0.10700582  | -7.3066469 | 2.69E-12   |
| Ferrous iron-sensing transcriptional regulator FeoC                                                                     | 2974.43105  | -0.7845046 | 0.1251663   | -6.2676988 | 2.69E-09   |
| DNA-binding protein stpA                                                                                                | 417.465223  | -0.785216  | 0.14098829  | -5.5693706 | 1.52E-07   |
| FIG00637875: hypothetical protein                                                                                       | 2753.68557  | -0.7880233 | 0.12516037  | -6.2961089 | 2.27E-09   |
| 2-dehydro-3-deoxygluconate kinase                                                                                       | 1211.55146  | -0.7887393 | 0.10522484  | -7.4957516 | 6.88E-13   |
| ElaA protein                                                                                                            | 198.719651  | -0.7925041 | 0.15483644  | -5.1183309 | 1.67E-06   |
| Flagellar biosynthesis protein FljS                                                                                     | 5038.68363  | -0.7940072 | 0.13682267  | -5.8031844 | 4.13E-08   |
| Glucose-6-phosphate isomerase                                                                                           | 19873.3771  | -0.794497  | 0.09323376  | -8.521559  | 2.23E-16   |
| Putative glycosyltransferase                                                                                            | 3441.35457  | -0.7946634 | 0.15335898  | -5.181721  | 1.21E-06   |
| Crotonobetainyl-CoA:carnitine CoA-transferase                                                                           | 1182.52456  | -0.7962161 | 0.10741721  | -7.4123699 | 1.26E-12   |
| Microcin H47 precursor (MccH47)                                                                                         | 7139.49881  | -0.7972781 | 0.16228159  | -4.9129302 | 4.54E-06   |
| Flagellar biosynthesis protein FlgN                                                                                     | 2347.11634  | -0.7992549 | 0.16203232  | -4.9326882 | 4.14E-06   |
| Phosphotransferase system%2C phosphocarrier protein HPr                                                                 | 4634.93856  | -0.8002022 | 0.11725788  | -6.8242941 | 7.78E-11   |
| Mg(2+) transport ATPase protein C / Putative membrane transporter ATPase%2CYhID                                         | 418.511397  | -0.8005957 | 0.22353344  | -3.5815478 | 0.00113639 |
| Protein RcsF                                                                                                            | 1963.87212  | -0.8013106 | 0.09729285  | -8.2360685 | 2.30E-15   |
| FIG00638561: hypothetical protein                                                                                       | 59573.3661  | -0.8035496 | 0.12797449  | -6.2789825 | 2.52E-09   |
| Succinate dehydrogenase flavoprotein subunit                                                                            | 6207.57121  | -0.8052269 | 0.09637255  | -8.3553554 | 8.77E-16   |
| Cytosine deaminase                                                                                                      | 3002.55558  | -0.8055191 | 0.09067083  | -8.8839946 | 1.00E-17   |
| Flagellar hook-associated protein FlgK                                                                                  | 2867.46217  | -0.8055729 | 0.12024789  | -6.6992682 | 1.80E-10   |
| Maltose/maltodextrin ABC transporter%2C substrate binding periplasmic protein MalE                                      | 166.191356  | -0.8057041 | 0.17281834  | -4.6621447 | 1.49E-05   |
| FIG00639949: hypothetical protein                                                                                       | 1447.79929  | -0.8102318 | 0.105112487 | -7.7073273 | 1.44E-13   |
| Acetyltransferase                                                                                                       | 69.495084   | -0.810283  | 0.2461751   | -3.2914905 | 0.00299734 |
| Alkylphosphonate utilization operon protein PhnA                                                                        | 943.806078  | -0.8138981 | 0.10771114  | -7.5563042 | 4.46E-13   |
| HTH-type transcriptional regulator znrT                                                                                 | 387.949333  | -0.8144927 | 0.13976946  | -5.8274012 | 3.59E-08   |
| Ferritin-like protein 2                                                                                                 | 787.011421  | -0.8151552 | 0.1360732   | -5.9905641 | 1.41E-08   |
| DNA damage-inducible gene in SOS regulon%2Cdependent on cyclic AMP and H-NS                                             | 1936.87201  | -0.8191319 | 0.16547963  | -4.9500466 | 3.81E-06   |
| Pyridoxal kinase                                                                                                        | 956.314286  | -0.8193114 | 0.12435753  | -6.5883538 | 3.63E-10   |
| Beta-lactamase                                                                                                          | 4972.40445  | -0.8195321 | 0.10374715  | -7.899322  | 3.33E-14   |
| 3-methyl-2-oxobutanoate hydroxymethyltransferase                                                                        | 10114.6854  | -0.8209079 | 0.08329561  | -9.8553551 | 1.33E-21   |
| ATP synthase B chain                                                                                                    | 16574.3802  | -0.8222572 | 0.10291178  | -7.9899232 | 1.64E-14   |
| probable lipoprotein                                                                                                    | 139.906647  | -0.8230559 | 0.19425758  | -4.2369308 | 9.35E-05   |
| Phosphoenolpyruvate carboxykinase [ATP]                                                                                 | 5381.8725   | -0.8241228 | 0.11882772  | -6.9354425 | 3.68E-11   |
| Ribose operon repressor                                                                                                 | 959.914668  | -0.8243733 | 0.22502554  | -3.6634654 | 0.00085242 |
| Exonuclease SbcC                                                                                                        | 3181.02415  | -0.8250379 | 0.10317984  | -7.9961159 | 1.56E-14   |
| L-aspartate oxidase                                                                                                     | 28456.9246  | -0.8254377 | 0.09277091  | -8.8975924 | 9.00E-18   |
| NADPH-dependent broad range aldehyde dehydrogenase YqhD                                                                 | 1931.13865  | -0.8263203 | 0.12830497  | -6.4402833 | 9.29E-10   |
| Putative carbohydrate PTS system%2C IIA component                                                                       | 65.293698   | -0.8263629 | 0.21022843  | -3.9307856 | 0.00031893 |
| putative oxidoreductase%2C Fe-S subunit                                                                                 | 24.8635513  | -0.8274914 | 0.34983505  | -2.3653759 | 0.03932336 |
| Pyruvate kinase                                                                                                         | 10515.5544  | -0.8291813 | 0.09242035  | -8.9718472 | 4.77E-18   |
| iron acquisition yersiniabactin synthesis enzyme (Irp1%2Cpolyketide synthetase)                                         | 630816.1659 | -0.8299795 | 0.16250929  | -5.1072744 | 1.76E-06   |
| Phosphogluconate dehydratase                                                                                            | 1163.40018  | -0.8302091 | 0.12776193  | -6.4980983 | 6.45E-10   |
| Uptake hydrogenase small subunit precursor                                                                              | 2031.17911  | -0.8306742 | 0.1883467   | -4.4103465 | 4.53E-05   |
| putative phage tail component                                                                                           | 191.803016  | -0.8311612 | 0.1827525   | -4.5480156 | 2.49E-05   |
| Glycosyl transferase                                                                                                    | 3667.98848  | -0.8357256 | 0.13149656  | -6.3554938 | 1.59E-09   |
| ATP-dependent protease La                                                                                               | 42001.1901  | -0.839767  | 0.10207738  | -8.2267694 | 2.47E-15   |
| Dihydropyrimidine dehydrogenase [NADP+]                                                                                 | 185.743136  | -0.8417651 | 0.16257841  | -5.1775947 | 1.23E-06   |
| Head decoration protein                                                                                                 | 384.888392  | -0.8443084 | 0.19545338  | -4.3197432 | 6.60E-05   |
| Methionine ABC transporter substrate-binding protein                                                                    | 32457.6997  | -0.8446042 | 0.12930306  | -6.5319743 | 5.16E-10   |
| 2%2C3'-cyclic-nucleotide 2'-phosphodiesterase                                                                           | 2924.60413  | -0.8483472 | 0.09776875  | -8.6770794 | 5.97E-17   |
| FIG00637878: hypothetical protein                                                                                       | 1645.53574  | -0.8483623 | 0.12470673  | -6.8028592 | 8.95E-11   |
| Hypothetical response regulatory protein yehT                                                                           | 208.535473  | -0.8539571 | 0.16783362  | -5.0881172 | 1.93E-06   |
| Prophage Ctp protease-like protein                                                                                      | 725.079716  | -0.8557881 | 0.18828962  | -4.5450626 | 2.52E-05   |
| Phosphoglycerate mutase                                                                                                 | 107207.163  | -0.8564986 | 0.11287963  | -7.5877167 | 3.53E-13   |
| Phosphomannomutase                                                                                                      | 8328.49607  | -0.8579443 | 0.11813931  | -7.2621402 | 3.72E-12   |
| Universal stress protein A                                                                                              | 19263.6564  | -0.8584209 | 0.16817389  | -5.1043651 | 1.78E-06   |
| Transcriptional regulator%2C ArsR family                                                                                | 380.904507  | -0.8589934 | 0.25382697  | -3.384169  | 0.00221195 |
| Ascorbate-specific PTS system%2C EIIa component                                                                         | 138.002614  | -0.8595443 | 0.1926917   | -4.4607229 | 3.66E-05   |
| Iron(III) dicitrate transport ATP-binding protein FeoC (TC 3.A.1.14.1)                                                  | 2087.66463  | -0.8608431 | 0.13653457  | -6.3049459 | 2.15E-09   |
| 3'-to-5' oligoribonuclease (orn)                                                                                        | 1256.53821  | -0.8651858 | 0.11138398  | -7.7675964 | 9.14E-14   |
| hypothetical protein                                                                                                    | 8120.81178  | -0.8655432 | 0.1451592   | -5.9627172 | 1.65E-08   |
| isochorismate synthase                                                                                                  | 27034.0573  | -0.8665131 | 0.11746     | -7.3770914 | 1.62E-12   |
| Transcription repressor                                                                                                 | 1703.60074  | -0.8694254 | 0.11463465  | -7.5843156 | 3.62E-13   |
| FxsA protein                                                                                                            | 560.387633  | -0.8695151 | 0.12402089  | -7.0110378 | 2.19E-11   |
| Cytochrome c-type biogenesis protein CcmD%2CInteracts with CcmCE                                                        | 19.4358601  | -0.8697045 | 0.36489726  | -2.3834228 | 0.03777276 |
| Pectin degradation protein KdgF                                                                                         | 99.7416508  | -0.8748724 | 0.24519269  | -3.5681015 | 0.00118796 |
| Alkaline phosphatase like protein                                                                                       | 163.483214  | -0.8776959 | 0.18580769  | -4.7236789 | 1.12E-05   |
| Glycosyltransferase                                                                                                     | 5178.38349  | -0.8801766 | 0.19694454  | -4.4691596 | 3.53E-05   |
| YdcH protein                                                                                                            | 289.915377  | -0.880202  | 0.13862697  | -6.3494282 | 1.65E-09   |
| PTS system%2C fructose-specific IIB component                                                                           | 40.253626   | -0.8802431 | 0.26773483  | -3.2877423 | 0.00030367 |
| Putative acetyltransferase                                                                                              | 46.5444539  | -0.881935  | 0.23696005  | -3.7218723 | 0.00068943 |
| COG3311: Predicted transcriptional regulator                                                                            | 36.4909425  | -0.8835206 | 0.30271673  | -2.9186383 | 0.0025055  |
| UDP-N-acetylmuramate:L-alanyl-gamma-D-glutamyl-meso-diaminopimelate ligase                                              | 4404.78235  | -0.8866047 | 0.09996823  | -8.8688644 | 1.14E-17   |
| Phage integrase                                                                                                         | 523.539123  | -0.8886089 | 0.12802827  | -6.940724  | 3.56E-11   |
| ATP synthase delta chain                                                                                                | 17395.3979  | -0.8912079 | 0.11066927  | -8.0528942 | 9.99E-15   |
| Proposed lipote regulatory protein YbeD                                                                                 | 973.351122  | -0.8931768 | 0.22516529  | -3.9667607 | 0.00027909 |
| 5'-methylthioadenosine nucleosidase / S-adenosylhomocysteine nucleosidase                                               | 11410.9673  | -0.8935651 | 0.0897125   | -9.9603193 | 4.78E-22   |
| S-formylglutathione hydrolase                                                                                           | 2611.32056  | -0.8956661 | 0.12630262  | -7.0914289 | 1.25E-11   |
| Ornithine carbamoyltransferase                                                                                          | 117.202211  | -0.8973838 | 0.18890999  | -4.7503247 | 9.88E-06   |
| Di/tripeptide peptidase YjdL                                                                                            | 777.234332  | -0.8984885 | 0.12052314  | -7.454904  | 9.31E-13   |
| Putative sulfite oxidase subunit YedY                                                                                   | 30933.8719  | -0.8987239 | 0.19107568  | -4.7034972 | 1.23E-05   |
| Acetate kinase                                                                                                          | 12021.9028  | -0.8990623 | 0.10108775  | -8.8938799 | 9.28E-18   |
| Anaerobic glycerol-3-phosphate dehydrogenase subunit B                                                                  | 172.216948  | -0.8993051 | 0.21458842  | -4.1908371 | 0.00011277 |
| Anthranilate synthase%2C aminase component                                                                              | 10868.46    | -0.9046772 | 0.1404387   | -6.4417941 | 9.23E-10   |
| Lysyl-tRNA synthetase (class II)                                                                                        | 12716.5739  | -0.9053224 | 0.10371969  | -8.7285496 | 3.84E-17   |
| phage lysozyme                                                                                                          | 62.4755594  | -0.9078062 | 0.32204474  | -2.8188821 | 0.01225767 |
| Glycosyl transferase                                                                                                    | 3744.8085   | -0.908994  | 0.10980411  | -8.2783237 | 1.64E-15   |
| Antigen 43 precursor                                                                                                    | 4813.36371  | -0.9101245 | 0.11590456  | -7.852362  | 4.77E-14   |
| putative membrane protein                                                                                               | 1311.617    | -0.9138477 | 0.14494264  | -6.3048922 | 2.15E-09   |
| Glutamate-1-semialdehyde aminotransferase                                                                               | 18941.676   | -0.9173393 | 0.10242379  | -8.9563112 | 5.46E-18   |
| Mutator mutT protein (7%2C8-dihydro-8-oxoguanine-triphosphatase)                                                        | 71.3922194  | -0.9191457 | 0.21956221  | -4.1862654 | 0.00011473 |
| NAD(P) transhydrogenase subunit beta                                                                                    | 17115.9526  | -0.9203687 | 0.10874513  | -8.4635397 | 3.60E-16   |
| N-acetylmuramate lyase                                                                                                  | 74.3730135  | -0.9210005 | 0.22883664  | -4.024707  | 0.00022195 |
| Transcriptional repressor protein TrpR                                                                                  | 611.664357  | -0.9229115 | 0.15881227  | -5.8113361 | 3.94E-08   |
| Putative oxidoreductase YjdI                                                                                            | 63.2373681  | -0.928804  | 0.26472613  | -3.5085468 | 0.00146101 |
| Ferrous iron transport periplasmic protein EfeO%2CContains peptidase-M75 domain and (frequently) cupredoxin-like domain | 22287.3535  | -0.9294107 | 0.15324762  | -6.0647645 | 9.18E-09   |
| FIG00640624: hypothetical protein                                                                                       | 2200.91333  | -0.9305631 | 0.1256903   | -7.4036186 | 1.34E-12   |
| Mannose-1-phosphate guanylyltransferase (GDP)                                                                           | 7123.98936  | -0.9306196 | 0.15932808  | -5.840901  | 3.33E-08   |
| 4-carboxymuconolactone decarboxylase domain/alkylhydroperoxidase AhpD family core domain protein                        | 120.532799  | -0.9323447 | 0.25314513  | -3.6830442 | 0.00079412 |
| FIG00638599: hypothetical protein                                                                                       | 68.100731   | -0.937126  | 0.23411996  | -4.00276   | 0.00024219 |
| Iron(III) dicitrate transport system permease protein FecD (TC 3.A.1.14.1)                                              | 694.935596  | -0.937271  | 0.19895035  | -4.7110796 | 1.19E-05   |
| FIG00638822: hypothetical protein                                                                                       | 184.267461  | -0.9379444 | 0.27893665  | -3.3625714 | 0.0023738  |
| 4-hydroxy-2-oxoglutarate aldolase                                                                                       | 5879.85184  | -0.9395892 | 0.10518249  | -8.9329434 | 6.65E-18   |
| Flagellar transcriptional activator FlhD                                                                                | 1412.34979  | -0.9404393 | 0.13555009  | -6.9379464 | 3.62E-11   |
| Formate dehydrogenase N alpha subunit                                                                                   | 435.946106  | -0.940863  | 0.14293188  | -6.582597  | 3.76E-10   |
| Oxygen-insensitive NAD(P)H nitroreductase                                                                               | 6937.72836  | -0.9413836 | 0.09473671  | -9.9368406 | 6.02E-22   |





|                                                                                                                                  |            |            |            |            |            |
|----------------------------------------------------------------------------------------------------------------------------------|------------|------------|------------|------------|------------|
| Hypothetical protein YdY                                                                                                         | 133.220993 | -1.9686225 | 0.21950813 | -8.9683353 | 4.91E-18   |
| Arginine deiminase                                                                                                               | 76.141694  | -1.9722576 | 0.31188071 | -6.3237565 | 1.93E-09   |
| Cyd operon protein YbgT                                                                                                          | 4703.58337 | -1.9771357 | 0.17079082 | -11.576358 | 1.86E-29   |
| Beta-galactosidase                                                                                                               | 13545.1318 | -1.9986595 | 0.11401105 | -17.530401 | 1.73E-66   |
| Pyruvate formate-lyase                                                                                                           | 358753.342 | -2.0143361 | 0.14623426 | -13.774721 | 2.38E-41   |
| Putative polyketide synthase                                                                                                     | 10968.3207 | -2.0155229 | 0.16666036 | -12.093595 | 5.08E-32   |
| PTS system%2C mannose-specific IIA component                                                                                     | 18225.998  | -2.0221607 | 0.14084893 | -14.356948 | 7.79E-45   |
| Transcriptional regulator of catabolic arginine decarboxylase (adiA)                                                             | 1565.48873 | -2.0238997 | 0.18577996 | -10.894069 | 3.40E-26   |
| Isoaspartyl dipeptidase                                                                                                          | 4577.08904 | -2.0361337 | 0.11532086 | -17.656248 | 2.27E-67   |
| Lysine decarboxylase%2C inducible                                                                                                | 13953.3001 | -2.0372624 | 0.19122989 | -10.653472 | 4.30E-25   |
| Nitrite reductase [NAD(P)H] small subunit                                                                                        | 186.4948   | -2.0541624 | 0.27379018 | -7.5026882 | 6.57E-13   |
| Formate hydrogenlyase subunit 3                                                                                                  | 1240.4963  | -2.0651306 | 0.20509894 | -10.068948 | 1.67E-22   |
| Butyryl-CoA dehydrogenase                                                                                                        | 23669.6178 | -2.0740465 | 0.21449726 | -9.669338  | 7.64E-21   |
| [NiFe] hydrogenase nickel incorporation-associated protein HypB                                                                  | 764.781344 | -2.0760384 | 0.18115748 | -11.459855 | 6.89E-29   |
| Cobalt/zinc/cadmium efflux RND transporter%2C Membrane fusion protein%2C CzcB family                                             | 1999.91669 | -2.0914089 | 0.32317241 | -6.4714957 | 7.63E-10   |
| Outer membrane porin protein NmpC precursor                                                                                      | 7694.05549 | -2.0968751 | 0.19933224 | -10.519498 | 1.70E-24   |
| Chaperone HdeB                                                                                                                   | 11097.0554 | -2.0971941 | 0.23496632 | -8.9255096 | 7.07E-18   |
| hypothetical protein                                                                                                             | 5922.36954 | -2.0987739 | 0.20181145 | -10.399677 | 5.83E-24   |
| Long-chain-fatty-acid-CoA ligase                                                                                                 | 79680.9402 | -2.1086951 | 0.20975347 | -10.053207 | 1.93E-22   |
| Glutamyl decarboxylase                                                                                                           | 2481.54768 | -2.1097305 | 0.32754183 | -6.4411025 | 9.26E-10   |
| Flagellar biosynthesis protein FlhB                                                                                              | 1399.99261 | -2.1161752 | 0.18879738 | -11.208711 | 1.10E-27   |
| Putative 3-hydroxyacyl-coa dehydrogenase                                                                                         | 20195.1593 | -2.121575  | 0.21292459 | -9.9639735 | 4.65E-22   |
| Lysine/cadaverine antiporter membrane protein CadB                                                                               | 4885.15575 | -2.1266738 | 0.20692008 | -10.277755 | 2.03E-23   |
| iron acquisition yersiniabactin synthesis enzyme (lrp2)                                                                          | 28104.8183 | -2.1275306 | 0.17703823 | -12.017351 | 1.24E-31   |
| Formate dehydrogenase H                                                                                                          | 2047.1166  | -2.1351277 | 0.1681008  | -12.701473 | 2.92E-35   |
| [NiFe] hydrogenase nickel incorporation protein HypA                                                                             | 115.673416 | -2.1387564 | 0.24496285 | -8.730942  | 3.77E-17   |
| [NiFe] hydrogenase metalocenter assembly protein HypC                                                                            | 137.543912 | -2.1595467 | 0.24121408 | -8.9528218 | 5.61E-18   |
| PTS system%2C mannose-specific IID component                                                                                     | 17565.2627 | -2.1845834 | 0.15324631 | -14.255374 | 3.12E-44   |
| Cation efflux system protein CusC precursor                                                                                      | 567.439953 | -2.1872102 | 0.26006798 | -8.410148  | 5.60E-16   |
| Pyruvate formate-lyase                                                                                                           | 68667.0007 | -2.1917815 | 0.17451078 | -12.559577 | 1.72E-34   |
| FIG139552: Putative protease                                                                                                     | 257.708652 | -2.2196477 | 0.22706607 | -9.7753388 | 2.81E-21   |
| LSU ribosomal protein L31p @ LSU ribosomal protein L31p%2C zinc-dependent                                                        | 1714.63511 | -2.2201128 | 0.1502734  | -17.773824 | 1.93E-47   |
| Chaperone HdeA                                                                                                                   | 10150.8337 | -2.2645779 | 0.19724481 | -11.481052 | 5.51E-29   |
| Formate hydrogenlyase regulatory protein HycA                                                                                    | 277.109119 | -2.2692674 | 0.21762194 | -10.427567 | 4.39E-24   |
| Formate hydrogenlyase maturation protein yhcH                                                                                    | 481.959467 | -2.2827702 | 0.1790553  | -12.748967 | 1.61E-35   |
| Phosphoribosylaminoimidazole-succinocarboxamide synthase                                                                         | 6500.99484 | -2.2970927 | 0.14116536 | -16.272354 | 2.29E-57   |
| Formate hydrogenlyase subunit 2                                                                                                  | 396.4564   | -2.3087067 | 0.24781379 | -9.3162962 | 2.13E-19   |
| Putative TonB dependent outer membrane receptor                                                                                  | 4326.94692 | -2.3151381 | 0.16738862 | -13.830917 | 1.12E-41   |
| Chaperone protein HtpG                                                                                                           | 32280.7139 | -2.3167814 | 0.30782403 | -7.5263176 | 5.56E-13   |
| Chaperone protein DnaK                                                                                                           | 123871.375 | -2.317084  | 0.20852298 | -11.111888 | 3.17E-27   |
| Putative fibrillar-like protein                                                                                                  | 91.4889482 | -2.3243547 | 0.24506505 | -9.846436  | 4.43E-20   |
| Arginine/arginine antiporter                                                                                                     | 87.259125  | -2.3267614 | 0.14432297 | -16.121907 | 2.57E-56   |
| Orf2                                                                                                                             | 1061.7772  | -2.3409036 | 0.2015262  | -11.615878 | 1.18E-29   |
| FIG00638598: hypothetical protein                                                                                                | 390.330634 | -2.3497831 | 0.24266414 | -9.6832727 | 6.72E-21   |
| Putative thiosulfate sulfurtransferase ynjE                                                                                      | 362.685682 | -2.3793692 | 0.20858908 | -11.406969 | 1.23E-28   |
| Heat shock protein 60 family chaperone GroEL                                                                                     | 107336.349 | -2.4124887 | 0.31640716 | -7.6246337 | 2.69E-13   |
| Arginine decarboxylase%2C catabolic                                                                                              | 681.932066 | -2.425432  | 0.15407403 | -15.741991 | 9.46E-54   |
| Molybdenum transport system protein ModD                                                                                         | 1055.43129 | -2.4454184 | 0.20545944 | -11.902195 | 4.56E-31   |
| Flagellar biosynthesis protein FljP                                                                                              | 558.366051 | -2.5079391 | 0.33449368 | -7.4977174 | 6.80E-13   |
| Formate hydrogenlyase subunit 7                                                                                                  | 991.54509  | -2.560522  | 0.19099325 | -13.406348 | 3.37E-39   |
| 3-oxoacyl-[acyl-carrier-protein] synthase                                                                                        | 81727.0419 | -2.5676042 | 0.31394004 | -8.186451  | 3.63E-15   |
| Anthranilate synthase%2C amidotransferase component                                                                              | 37239.0527 | -2.5798749 | 0.42850527 | -6.0206374 | 1.18E-08   |
| ID=gene:EBG00000313296                                                                                                           | 903.43708  | -2.5832904 | 0.97504497 | -2.6494064 | 0.0194111  |
| ClpB protein                                                                                                                     | 53476.711  | -2.589505  | 0.22008495 | -11.765934 | 2.18E-30   |
| Flagellar biosynthesis protein FljQ                                                                                              | 171.287614 | -2.5938519 | 0.29335129 | -8.8421358 | 1.43E-17   |
| Heat shock protein 60 family co-chaperone GroES                                                                                  | 6626.40999 | -2.6064747 | 0.38202264 | -6.8228278 | 7.84E-11   |
| Putative inner membrane protein                                                                                                  | 8136.61086 | -2.6143333 | 0.1988044  | -13.150279 | 9.55E-38   |
| Formate hydrogenlyase subunit 4                                                                                                  | 655.713412 | -2.6151044 | 0.19806179 | -13.203477 | 4.83E-38   |
| Uptake hydrogenase large subunit                                                                                                 | 1242.38598 | -2.6456137 | 0.20182938 | -13.108169 | 1.65E-37   |
| NAD-dependent glyceraldehyde-3-phosphate dehydrogenase                                                                           | 193948.443 | -2.6923533 | 0.15873883 | -16.960899 | 2.91E-62   |
| Cation efflux system protein CusF precursor                                                                                      | 623.49982  | -2.7279622 | 0.3530247  | -7.7273976 | 1.24E-13   |
| Flagellar protein FlhE                                                                                                           | 517.64418  | -2.7285791 | 0.18448661 | -14.79012  | 1.57E-47   |
| Outer membrane protein W precursor                                                                                               | 2316.3842  | -2.7773075 | 0.19751437 | -14.061293 | 4.64E-43   |
| Putative amidase                                                                                                                 | 7885.36625 | -2.8123884 | 0.20371392 | -13.805578 | 1.57E-41   |
| Formate hydrogenlyase subunit 5                                                                                                  | 1820.12224 | -2.8146035 | 0.18282901 | -15.394731 | 1.87E-51   |
| Formate hydrogenlyase complex 3 iron-sulfur protein%3B Formate hydrogenlyase subunit 6%3B Ni%2CFe-hydrogenase III medium subunit | 563.447067 | -2.8193792 | 0.21155794 | -13.326747 | 9.69E-39   |
| Flagellar biosynthesis protein FljH                                                                                              | 1620.4369  | -2.8211608 | 0.19765066 | -14.27347  | 2.48E-44   |
| Flagellar biosynthesis protein FlhA                                                                                              | 4217.51137 | -2.8370317 | 0.18257185 | -15.539262 | 2.07E-52   |
| Flagellar motor switch protein FljM                                                                                              | 4014.31537 | -2.9005574 | 0.20337047 | -14.262431 | 2.86E-44   |
| Uptake hydrogenase small subunit precursor                                                                                       | 745.255356 | -2.920793  | 0.23586248 | -12.383458 | 1.52E-33   |
| iron acquisition yersiniabactin synthesis enzyme (lrp2)                                                                          | 10795.3113 | -2.9368708 | 0.19827226 | -14.812313 | 1.18E-47   |
| Aldose 1-epimerase family protein YeaD                                                                                           | 6154.07077 | -2.949278  | 0.16557042 | -17.812831 | 1.66E-68   |
| iron acquisition yersiniabactin synthesis enzyme (lrp2)                                                                          | 5223.38697 | -2.9963933 | 0.23262019 | -12.881054 | 3.09E-36   |
| Flagellar protein FljI [peptidoglycan hydrolase]                                                                                 | 7019.86299 | -3.0435253 | 0.20476373 | -14.863596 | 5.60E-48   |
| Putative membrane protein                                                                                                        | 597.818237 | -3.0716277 | 0.17852316 | -17.205765 | 4.55E-64   |
| FIG00638267: hypothetical protein                                                                                                | 343.183998 | -3.1449989 | 0.36337957 | -8.6548589 | 7.14E-17   |
| Flagellar biosynthesis protein FljL                                                                                              | 1710.75312 | -3.146588  | 0.19020061 | -16.543523 | 2.81E-59   |
| Flagellar motor switch protein FljN                                                                                              | 2724.16025 | -3.2216276 | 0.20544999 | -15.680836 | 2.42E-53   |
| Flagellum-specific ATP synthase FljI                                                                                             | 5324.12006 | -3.2311566 | 0.2168875  | -14.897846 | 3.43E-48   |
| FIG00637915: hypothetical protein                                                                                                | 906.051366 | -3.2514227 | 0.16676673 | -19.496831 | 4.60E-82   |
| Flagellar P-ring protein FljI                                                                                                    | 10441.2703 | -3.2642663 | 0.19394444 | -16.830935 | 2.45E-61   |
| ID=gene:EBG00000313254                                                                                                           | 76.7034261 | -3.2966835 | 1.23129509 | -2.6774114 | 0.01806533 |
| Flagellar assembly protein FljH                                                                                                  | 2809.03859 | -3.3279537 | 0.23036064 | -14.446711 | 2.22E-45   |
| Indole-3-glycerol phosphate synthase                                                                                             | 32447.8571 | -3.3498974 | 0.33245003 | -10.076394 | 1.55E-22   |
| Flagellar protein FljI                                                                                                           | 1030.66515 | -3.4204634 | 0.21911198 | -15.610572 | 7.12E-53   |
| Flagellar M-ring protein FljF                                                                                                    | 4928.74309 | -3.4340898 | 0.21564995 | -15.924371 | 5.64E-55   |
| FIG00638357: hypothetical protein                                                                                                | 343.366424 | -3.4424004 | 0.38906526 | -8.847874  | 1.37E-17   |
| Flagellar L-ring protein FljH                                                                                                    | 7739.87682 | -3.4950108 | 0.21321877 | -16.391666 | 3.35E-58   |
| Flagellar motor switch protein FljG                                                                                              | 6325.61724 | -3.5160714 | 0.22703111 | -15.487179 | 4.55E-52   |
| Flagellar hook-basal body complex protein FljE                                                                                   | 597.932173 | -3.5255533 | 0.36294437 | -9.7881482 | 2.49E-21   |
| Flagellar hook-length control protein FljK                                                                                       | 4523.16488 | -3.5605286 | 0.31051868 | -11.466391 | 6.48E-29   |
| Flagellar basal-body P-ring formation protein FljA                                                                               | 5051.67217 | -3.6678276 | 0.31403439 | -11.6797   | 5.89E-30   |
| Flagellar basal-body rod protein FljG                                                                                            | 24111.2685 | -3.7415964 | 0.21099888 | -17.732779 | 6.15E-68   |
| Lead%2C cadmium%2C zinc and mercury transporting ATPase                                                                          | 6699.95227 | -3.788936  | 0.19567563 | -19.363352 | 5.72E-81   |
| Flagellar hook protein FljE                                                                                                      | 65563.9508 | -3.9362909 | 0.31071108 | -12.668653 | 4.39E-35   |
| Flagellar basal-body rod modification protein FljD                                                                               | 24897.8125 | -3.9616281 | 0.29750919 | -13.315986 | 1.11E-38   |
| Flagellar basal-body rod protein FljF                                                                                            | 21237.3832 | -3.9817416 | 0.22587525 | -17.628056 | 3.38E-67   |
| Flagellar basal-body rod protein FljC                                                                                            | 12613.6773 | -4.0730441 | 0.29931852 | -13.607725 | 2.27E-40   |
| Tryptophan synthase alpha chain                                                                                                  | 49533.8783 | -4.1313597 | 0.32900015 | -12.557318 | 1.75E-34   |
| Tryptophan synthase beta chain                                                                                                   | 80187.7869 | -4.1440796 | 0.32189511 | -12.874006 | 3.35E-36   |
| Flagellar basal-body rod protein FljB                                                                                            | 7082.29593 | -4.1773211 | 0.36459985 | -11.452726 | 7.05E-29   |
| Aspartate carbamoyltransferase regulatory chain (Pyl)                                                                            | 3585.53228 | -4.3553677 | 0.22538558 | -19.324074 | 1.14E-80   |
| Aspartate carbamoyltransferase                                                                                                   | 5442.73045 | -4.84097   | 0.22032484 | -21.971967 | 2.53E-104  |









|                                                                                                     |            |            |            |            |            |
|-----------------------------------------------------------------------------------------------------|------------|------------|------------|------------|------------|
| Hypothetical protein GlcG in glycolate utilization operon                                           | 300.220031 | 0.60896335 | 0.21008993 | 2.89858425 | 0.0175024  |
| Transaldolase                                                                                       | 16188.035  | 0.60885936 | 0.18274894 | 3.33167099 | 0.0055205  |
| Putative transport protein                                                                          | 274.40707  | 0.60858366 | 0.19564052 | 3.11072408 | 0.01021953 |
| Di/tripeptide permease DtpB                                                                         | 750.782101 | 0.60605876 | 0.13884496 | 4.36500368 | 0.00015791 |
| Glutamate synthase [NADPH] small chain                                                              | 10671.5995 | 0.60407302 | 0.09473595 | 6.37638609 | 7.90E-09   |
| Glutamate Aspartate transport system permease protein GitK (TC 3.A.1.3.4)                           | 296.457286 | 0.60400713 | 0.18289565 | 3.30246848 | 0.00597701 |
| Inner membrane protein YbhQ                                                                         | 760.395416 | 0.60285895 | 0.17146812 | 3.51586613 | 0.00316457 |
| FIG00639237: hypothetical protein                                                                   | 12076.5991 | 0.59999232 | 0.21841077 | 2.74708206 | 0.02571894 |
| Ethanolamine ammonia-lyase light chain                                                              | 687.552765 | 0.59939453 | 0.16777466 | 3.57261655 | 0.0026487  |
| Large-conductance mechanosensitive channel                                                          | 18860.7233 | 0.59650531 | 0.14017812 | 4.25533817 | 0.00023899 |
| FIG00638157: hypothetical protein                                                                   | 2488.76325 | 0.59622763 | 0.18152201 | 3.28460245 | 0.00627427 |
| Quinone oxidoreductase                                                                              | 5215.81895 | 0.59423776 | 0.12680226 | 4.68663284 | 4.30E-05   |
| Phage EaA protein                                                                                   | 320.208351 | 0.59421561 | 0.14637225 | 4.05961914 | 0.00049305 |
| Gifsy-2 prophage protein                                                                            | 219.684201 | 0.59378598 | 0.18501579 | 3.20938005 | 0.00777216 |
| Succinyl-CoA ligase [ADP-forming] beta chain                                                        | 231.273245 | 0.59327822 | 0.16446992 | 3.60721422 | 0.00236641 |
| probable lipoprotein                                                                                | 647.274044 | 0.59313223 | 0.19924495 | 2.97690007 | 0.01430341 |
| Glycolate utilization operon transcriptional activator GlcC                                         | 396.30146  | 0.59293556 | 0.23510212 | 2.5221106  | 0.04385612 |
| FIG00639173: hypothetical protein                                                                   | 687.70674  | 0.5926552  | 0.1292724  | 4.58454534 | 6.43E-05   |
| D-serine dehydratase                                                                                | 634.910152 | 0.5921593  | 0.13478308 | 4.39342479 | 0.00014192 |
| 4-hydroxybenzoyl-CoA thioesterase family active site                                                | 122.567039 | 0.59084727 | 0.22639349 | 2.60982446 | 0.03565357 |
| Sulfur carrier protein adenylyltransferase ThiF                                                     | 22582.4473 | 0.59069261 | 0.15749666 | 3.75050876 | 0.00147901 |
| Ribosyl nicotinamide transporter%2C PnuC-like                                                       | 10027.7743 | 0.58955126 | 0.08911163 | 6.61587339 | 1.76E-09   |
| FIG00638941: hypothetical protein                                                                   | 12651.6724 | 0.58926649 | 0.17611203 | 3.34597516 | 0.00528819 |
| Putative exported protein                                                                           | 8139.43614 | 0.58709746 | 0.17733818 | 3.31060949 | 0.00587043 |
| HtrA suppressor protein                                                                             | 177.249832 | 0.58491223 | 0.16005267 | 3.65449843 | 0.00202136 |
| NAD(P)H-flavin oxidoreductase                                                                       | 227.175087 | 0.58203606 | 0.19558902 | 2.97581155 | 0.01433874 |
| Anthranilate synthase%2C aminase component                                                          | 73337.3706 | 0.58024503 | 0.21675218 | 2.67699749 | 0.03018002 |
| Antigen 43 precursor                                                                                | 9354.44527 | 0.57972251 | 0.16577927 | 3.49695415 | 0.00334737 |
| hypothetical protein                                                                                | 214.153508 | 0.57609774 | 0.18211015 | 3.16345756 | 0.0089161  |
| predicted 4-deoxy-L-threo-5-hexosulose-uronate ketol-isomerase                                      | 254.379844 | 0.57429761 | 0.19751251 | 2.90765185 | 0.01716291 |
| S-ribosylhomocysteine lyase                                                                         | 10131.6789 | 0.57261467 | 0.16464311 | 3.47791462 | 0.00350868 |
| Napththoate synthase                                                                                | 3365.35717 | 0.57231665 | 0.18334748 | 3.12148628 | 0.00993728 |
| Inner membrane protein YqjE                                                                         | 12752.8302 | 0.57137315 | 0.16321538 | 3.50073101 | 0.00332339 |
| ATP-dependent RNA helicase                                                                          | 2536.19429 | 0.57132519 | 0.13986287 | 4.08489533 | 0.00045132 |
| Trehalose-6-phosphate phosphatase                                                                   | 3602.18379 | 0.57126995 | 0.14282768 | 3.99971457 | 0.00061572 |
| YcgN (Fragment)                                                                                     | 721.160707 | 0.57034882 | 0.11932115 | 4.77994749 | 2.92E-05   |
| orf%2C hypothetical protein                                                                         | 708.387261 | 0.57011004 | 0.13464883 | 4.23405109 | 0.00025887 |
| Cell filamentation protein fic                                                                      | 7838.70703 | 0.56959408 | 0.19214441 | 2.96441107 | 0.01472156 |
| Ethanolamine utilization polyhedral-body-like protein EutL                                          | 541.342713 | 0.56942974 | 0.1755914  | 3.24292503 | 0.00703956 |
| Homoserine kinase                                                                                   | 5656.96738 | 0.56832863 | 0.15524276 | 3.66090258 | 0.00198043 |
| Cystine ABC transporter%2C periplasmic cystine-binding protein FliY                                 | 6685.78465 | 0.56387305 | 0.14442774 | 3.90418802 | 0.00085731 |
| Dipeptidyl carboxypeptidase Dcp                                                                     | 2760.69665 | 0.56260255 | 0.14688583 | 3.830203   | 0.00111624 |
| Chaperone protein HtpG                                                                              | 7315.13612 | 0.56241873 | 0.13282811 | 4.23418444 | 0.00025887 |
| Tripeptide aminopeptidase                                                                           | 8457.6895  | 0.56221464 | 0.151402   | 3.71338979 | 0.00167366 |
| Regulator of sigma D                                                                                | 1779.60221 | 0.56151506 | 0.14831224 | 3.78603329 | 0.00130948 |
| Prophage CP4-57 integrase                                                                           | 204.23102  | 0.5611827  | 0.22261321 | 2.52088675 | 0.04393608 |
| FIG00639422: hypothetical protein                                                                   | 1263.75773 | 0.56112109 | 0.15212565 | 3.68853707 | 0.00180677 |
| Putative uncharacterized protein YrbL                                                               | 2256.68392 | 0.55830914 | 0.10366351 | 5.38578271 | 1.82E-06   |
| ABC-type polar amino acid transport system%2CATPase component                                       | 628.067099 | 0.55782471 | 0.12524166 | 4.45398677 | 0.00010888 |
| Protein YciE                                                                                        | 417.744068 | 0.5574773  | 0.15635979 | 3.56534952 | 0.00271421 |
| PTS system%2C mannitol-specific IIC component                                                       | 2575.23776 | 0.5568576  | 0.14445972 | 3.85476031 | 0.00103189 |
| Non-specific DNA-binding protein Dps / Iron-binding ferritin-like antioxidant protein / Ferroxidase | 37142.8478 | 0.5565227  | 0.18829234 | 2.95563108 | 0.0150665  |
| NAD(P) transhydrogenase subunit beta                                                                | 12855.7364 | 0.55648694 | 0.14325416 | 3.88461265 | 0.00092203 |
| Inner membrane transport protein YbaT                                                               | 2483.97479 | 0.55194977 | 0.19717619 | 2.79927197 | 0.02254586 |
| Cation transport regulator chaB                                                                     | 846.840225 | 0.55167145 | 0.15525093 | 3.55341794 | 0.00280352 |
| Phosphate transport system regulatory protein PhoU                                                  | 1175.25509 | 0.55008132 | 0.11189836 | 4.91590172 | 1.66E-05   |
| Osmoprotectant ABC transporter ATP-binding subunit YehX                                             | 1406.5105  | 0.5499187  | 0.19969048 | 2.75385533 | 0.02528066 |
| Trans-acetonitase 2-methyltransferase                                                               | 1186.27828 | 0.54898601 | 0.18358465 | 2.98987967 | 0.01395129 |
| type 1 fimbriae major subunit FimA                                                                  | 121.7245   | 0.54825603 | 0.17947406 | 3.05479262 | 0.01179134 |
| Fosmidomycin resistance protein                                                                     | 463.156982 | 0.54568308 | 0.15089056 | 3.61641635 | 0.00229551 |
| 2-deoxy-D-gluconate 3-dehydrogenase                                                                 | 262.690787 | 0.54498987 | 0.16477672 | 3.30744462 | 0.00590432 |
| S-(hydroxymethyl)glutathione dehydrogenase                                                          | 1630.79966 | 0.54322416 | 0.16654355 | 3.26175446 | 0.00669337 |
| Glycolate dehydrogenase                                                                             | 245.796655 | 0.54196129 | 0.16201215 | 3.34518927 | 0.00529566 |
| PapI protein                                                                                        | 253.616733 | 0.54062303 | 0.2067189  | 2.61525694 | 0.03515244 |
| hypothetical protein                                                                                | 138.275742 | 0.53968786 | 0.18875497 | 2.85919807 | 0.01927579 |
| L-lysine 6-monoxygenase [NADPH]                                                                     | 121955.144 | 0.53555433 | 0.11717086 | 4.57071242 | 6.76E-05   |
| L%2CD-transpeptidase YcbB                                                                           | 18558.3943 | 0.5347674  | 0.13137361 | 4.07058466 | 0.00047355 |
| 3-isopropylmalate dehydratase large subunit                                                         | 2406.11822 | 0.53346057 | 0.17060761 | 3.12682757 | 0.0097943  |
| L%2CD-transpeptidase YnhG                                                                           | 12598.2585 | 0.52734978 | 0.11494918 | 4.5876775  | 6.37E-05   |
| Endonuclease/Exonuclease/phosphatase family protein                                                 | 1358.29077 | 0.52641909 | 0.19934687 | 2.64071908 | 0.03301929 |
| 2-hydroxy-3-oxopropionate reductase                                                                 | 502.952249 | 0.5263154  | 0.17130091 | 3.07246125 | 0.01123191 |
| Branched-chain amino acid aminotransferase                                                          | 7318.96531 | 0.52630976 | 0.11035257 | 4.76934752 | 3.05E-05   |
| Hypothetical protein                                                                                | 168.560061 | 0.525841   | 0.18870347 | 2.78659957 | 0.02328834 |
| Putative Rz endopeptidase from lambdoid prophage DLP12                                              | 141.742949 | 0.52491989 | 0.16819464 | 3.1209074  | 0.00994472 |
| Acyl-CoA dehydrogenases                                                                             | 3841.39911 | 0.52397982 | 0.17860269 | 2.93377337 | 0.01597679 |
| Peptide methionine sulfoxide reductase MsrA                                                         | 5996.22678 | 0.52297666 | 0.10060079 | 5.1985341  | 4.65E-06   |
| Transcriptional regulator%2C AraC family                                                            | 347.513809 | 0.52283562 | 0.13672075 | 3.82411319 | 0.00113561 |
| Putative membrane protein                                                                           | 3408.12988 | 0.51792071 | 0.19509436 | 2.65471904 | 0.03193317 |
| Ribosome-associated heat shock protein implicated in the recycling of the 50S subunit (S4 paralog)  | 459.372934 | 0.51563007 | 0.12595424 | 4.09378878 | 0.00043731 |
| iron acquisition outer membrane yersiniabacin receptor (FyuA%2CPSn%2Cpepticin receptor)             | 69662.3671 | 0.51416579 | 0.16220933 | 3.16976707 | 0.00873374 |
| NADH-ubiquinone oxidoreductase chain J                                                              | 2281.65771 | 0.51408834 | 0.1814566  | 2.83312007 | 0.02066965 |
| PTS system%2C maltose and glucose-specific IIC component                                            | 412.498214 | 0.51326383 | 0.17668303 | 2.90499797 | 0.0172553  |
| Outer membrane protein C precursor                                                                  | 163663.101 | 0.51233789 | 0.1247247  | 4.10775005 | 0.00041548 |
| Hypothetical zinc-type alcohol dehydrogenase-like protein YphC                                      | 301.000799 | 0.51137062 | 0.18094988 | 2.82603455 | 0.02105214 |
| Head decoration protein                                                                             | 137.288297 | 0.51130425 | 0.20225149 | 2.52806173 | 0.04322722 |
| Aquaporin Z                                                                                         | 2526.09578 | 0.50999588 | 0.10704958 | 4.764109   | 3.12E-05   |
| Glutathione-regulated potassium-efflux system protein KefC                                          | 1700.11278 | 0.50781774 | 0.16787359 | 3.02500071 | 0.01277376 |
| Alpha-ketoglutarate-dependent taurine dioxygenase                                                   | 264.189487 | 0.50680938 | 0.1800294  | 2.81514786 | 0.02162957 |
| Cytoplasmic trehalase                                                                               | 9945.75286 | 0.5047901  | 0.16215035 | 3.11309906 | 0.01016219 |
| FIG00638099: hypothetical protein                                                                   | 259.482296 | 0.5038423  | 0.1706076  | 2.95322307 | 0.01516838 |
| Transcriptional regulator%2C TetR family                                                            | 3244.82895 | 0.50335599 | 0.11009206 | 4.57213688 | 6.75E-05   |
| Flagellar biosynthesis protein FliC                                                                 | 311257.262 | 0.50288088 | 0.14417023 | 3.48810475 | 0.00342024 |
| Beta-1%2C3-galactosyltransferase / Beta-1%2C4-galactosyltransferase                                 | 334.072406 | 0.50180484 | 0.1667077  | 3.01008787 | 0.01324557 |
| Uncharacterized protein ImpA                                                                        | 1664.11658 | 0.50032773 | 0.1430467  | 3.49765312 | 0.00334611 |
| Aspartokinase                                                                                       | 11558.0932 | 0.49794989 | 0.16529881 | 3.01242274 | 0.01320318 |
| probable membrane protein b2001                                                                     | 342.020738 | 0.49785997 | 0.17475385 | 2.84892129 | 0.019771   |
| FIG00638107: hypothetical protein                                                                   | 2979.64155 | 0.49640386 | 0.15984687 | 3.10549638 | 0.01032641 |
| Putative cytoplasmic protein %2C probably associated with Glutathione-regulated potassium-efflux    | 299.174013 | 0.49481508 | 0.19456114 | 2.54323694 | 0.0416365  |
| Capsular polysaccharide export system KpsF                                                          | 4564.32415 | 0.49461033 | 0.15321556 | 3.22819901 | 0.00735431 |
| Putative GTP-binding protein YdgA                                                                   | 21788.8197 | 0.49326705 | 0.10813924 | 4.5614067  | 6.96E-05   |
| NADH-ubiquinone oxidoreductase chain G                                                              | 12733.4583 | 0.49305318 | 0.19179846 | 2.57068375 | 0.03906552 |
| ABC transporter%2C periplasmic substrate-binding protein YnjB                                       | 868.103724 | 0.49002637 | 0.12771581 | 3.83684985 | 0.00192829 |
| FIG00638146: hypothetical protein                                                                   | 155.013998 | 0.48982311 | 0.19733178 | 2.48223122 | 0.04770039 |
| Xanthine/uracil/thiamine/ascorbate permease family protein                                          | 306.881131 | 0.48961788 | 0.15047042 | 2.35391447 | 0.00684469 |
| Thiosulfate sulfurtransferase%2C rhodanese                                                          | 3638.44582 | 0.48868937 | 0.10368029 | 4.71342609 | 3.83E-05   |
| Membrane alanine aminopeptidase N                                                                   | 23618.152  | 0.48796502 | 0.10415142 | 4.68514989 | 4.31E-05   |
| Glycyltransferase IroB                                                                              | 246440.751 | 0.48471768 | 0.12636326 | 3.83590673 | 0.00109289 |
| Enterobactin synthetase component F%2C serine activating enzyme                                     | 130373.027 | 0.48303419 | 0.1262646  | 3.8255711  | 0.00113179 |
| Periplasmic protein YqjC                                                                            | 6552.71935 | 0.48279155 | 0.12620639 | 3.82541288 | 0.00113179 |

|                                                                                                                                                               |            |            |            |            |            |
|---------------------------------------------------------------------------------------------------------------------------------------------------------------|------------|------------|------------|------------|------------|
| S-formylglutathione hydrolase                                                                                                                                 | 338.468416 | 0.48147078 | 0.16690667 | 2.88467066 | 0.01803275 |
| Thioredoxin 2                                                                                                                                                 | 360.077826 | 0.47858561 | 0.14246753 | 3.359261   | 0.00580375 |
| NADH-ubiquinone oxidoreductase chain 1                                                                                                                        | 229.19108  | 0.4784997  | 0.16263934 | 2.94209083 | 0.01563409 |
| Inner membrane protein YhjD                                                                                                                                   | 1414.12741 | 0.47803245 | 0.1169434  | 4.08772486 | 0.00044686 |
| Protein of unknown function DUF541                                                                                                                            | 2420.95526 | 0.47713611 | 0.10404914 | 4.58568069 | 6.41E-05   |
| FIG00637886: hypothetical protein                                                                                                                             | 238.100762 | 0.47704179 | 0.18568994 | 2.56902334 | 0.0392199  |
| Selenoprotein O and cysteine-containing homologs                                                                                                              | 6337.53539 | 0.47473569 | 0.12671254 | 3.74655645 | 0.00149421 |
| Protein ydhR precursor                                                                                                                                        | 1951.32425 | 0.47426838 | 0.14974082 | 3.16726192 | 0.00878715 |
| Glutamine ABC transporter%2C periplasmic glutamine-binding protein (TC 3.A.1.3.2)                                                                             | 11223.3292 | 0.47394658 | 0.09888089 | 4.7931061  | 2.77E-05   |
| Glycine dehydrogenase [decarboxylating] (glycine cleavage system P protein)                                                                                   | 1761.2075  | 0.47293644 | 0.14339849 | 3.2980573  | 0.00605505 |
| Sensory histidine kinase CseC                                                                                                                                 | 223.159323 | 0.47181179 | 0.14034206 | 3.36191367 | 0.00507051 |
| Regulatory protein SoxS                                                                                                                                       | 414.581892 | 0.47176936 | 0.18512914 | 2.54832577 | 0.04113715 |
| Cytoplasmic protein YaiE                                                                                                                                      | 2973.66561 | 0.47161282 | 0.15044233 | 3.13484123 | 0.0096108  |
| Glutathione S-transferase%2C omega                                                                                                                            | 1296.59413 | 0.47135816 | 0.1202638  | 3.91936862 | 0.00081983 |
| Glutamate Aspartate periplasmic binding protein precursor GltI (TC 3.A.1.3.4)                                                                                 | 1076.19628 | 0.47135568 | 0.14997028 | 3.14299387 | 0.00943057 |
| 18K peptidoglycan-associated outer membrane lipoprotein%3B Peptidoglycan-associated lipoprotein precursor%3B Outer membrane protein P6%3B OmpA/MotB precursor | 17544.7665 | 0.47040944 | 0.12871806 | 3.65457231 | 0.00202136 |
| Tellurite resistance protein TehB                                                                                                                             | 1002.28318 | 0.46952026 | 0.13694146 | 3.42862027 | 0.00409313 |
| LysR family transcriptional regulator YdcI                                                                                                                    | 637.279224 | 0.46937754 | 0.18192381 | 2.58007752 | 0.03814822 |
| Acetolactate synthase large subunit                                                                                                                           | 3538.4636  | 0.46757254 | 0.14875407 | 3.14325885 | 0.00943057 |
| Glucokinase%2C ROK family                                                                                                                                     | 654.117656 | 0.46255874 | 0.17276156 | 2.67744015 | 0.03016721 |
| L-fuculokinase                                                                                                                                                | 787.178188 | 0.46203977 | 0.15011622 | 3.0778804  | 0.01108138 |
| Cell division protein BofA                                                                                                                                    | 10384.5324 | 0.46104555 | 0.15386315 | 2.99646516 | 0.01371394 |
| Molybdenum cofactor biosynthesis protein MoeD                                                                                                                 | 396.298329 | 0.46102421 | 0.16768024 | 2.74942488 | 0.02558363 |
| FIG004088: inner membrane protein YebE                                                                                                                        | 735.467402 | 0.46077435 | 0.155293   | 2.96712893 | 0.01463907 |
| Uridine phosphorylase                                                                                                                                         | 16627.7282 | 0.4607062  | 0.15134865 | 3.044006   | 0.01206915 |
| Phosphoenolpyruvate-dihydroxyacetone phosphotransferase operon regulatory protein DhaR                                                                        | 586.630625 | 0.46038235 | 0.17372565 | 2.65005398 | 0.03229127 |
| L-proline glycine betaine ABC transport system permease protein ProV (TC 3.A.1.12.1)                                                                          | 2307.82192 | 0.45968072 | 0.13327962 | 3.44899481 | 0.00384793 |
| probable ribonuclease inhibitor YPO3690                                                                                                                       | 408.587287 | 0.45791123 | 0.18064542 | 2.53486209 | 0.04246769 |
| Xylose ABC transporter%2C permease protein XylH                                                                                                               | 181.717554 | 0.45693732 | 0.17064995 | 2.67762933 | 0.03016721 |
| probable haloacid dehalogenase-like hydrolase STY3852                                                                                                         | 1111.23176 | 0.45594455 | 0.10501712 | 4.34162113 | 0.00017238 |
| Cyclic di-GMP binding protein precursor                                                                                                                       | 12291.5867 | 0.45584262 | 0.11462254 | 3.9769022  | 0.00066738 |
| Universal stress protein A                                                                                                                                    | 26023.6266 | 0.45400446 | 0.12809082 | 3.5447084  | 0.00288362 |
| Starvation lipoprotein Slp paralogs                                                                                                                           | 2174.00246 | 0.45394005 | 0.16162977 | 2.80852028 | 0.02205826 |
| Phosphate transport ATP-binding protein PstB (TC 3.A.1.7.1)                                                                                                   | 654.781198 | 0.45351911 | 0.17118376 | 2.6493116  | 0.0333369  |
| Phage tail length tape-measure protein 1                                                                                                                      | 780.521689 | 0.45345718 | 0.12968089 | 3.49671562 | 0.00334737 |
| Lysine decarboxylase 2%2C constitutive                                                                                                                        | 3746.41009 | 0.4525391  | 0.16819129 | 2.6906214  | 0.02936973 |
| Outer membrane stress sensor protease DegQ%2Cserine protease                                                                                                  | 2757.1608  | 0.45234288 | 0.0985757  | 4.58878705 | 6.36E-05   |
| Outer membrane lipoprotein Bfc                                                                                                                                | 3965.65692 | 0.45012183 | 0.14298413 | 3.1480544  | 0.00931517 |
| Two-component system response regulator OmpR                                                                                                                  | 3048.85162 | 0.44985873 | 0.09709549 | 4.63315801 | 5.35E-05   |
| Low-specificity L-threonine aldolase                                                                                                                          | 4846.48671 | 0.44926259 | 0.15172151 | 2.96110011 | 0.01483311 |
| Glutamate Aspartate transport system permease protein GltJ (TC 3.A.1.3.4)                                                                                     | 288.548348 | 0.44874026 | 0.15030901 | 2.98545144 | 0.01408456 |
| 3'(2')%2C5'-biphosphate nucleotidase                                                                                                                          | 9070.43849 | 0.44778913 | 0.14981921 | 2.98886327 | 0.01396698 |
| FIG00639383: hypothetical protein                                                                                                                             | 179.929717 | 0.44698108 | 0.17903555 | 2.49660512 | 0.04625805 |
| Cytidine deaminase                                                                                                                                            | 4469.08318 | 0.44600117 | 0.15305559 | 2.91398152 | 0.01685468 |
| Glutathione-regulated potassium-efflux system protein KefB                                                                                                    | 1437.39156 | 0.44412694 | 0.11950492 | 3.71639058 | 0.00165691 |
| VgrG protein                                                                                                                                                  | 196.046952 | 0.44395451 | 0.17353671 | 2.55827434 | 0.04021462 |
| Phenylalanyl-tRNA synthetase beta chain                                                                                                                       | 13384.9145 | 0.443913   | 0.12360326 | 3.59143434 | 0.00248395 |
| probable lipoprotein                                                                                                                                          | 4137.76408 | 0.44374111 | 0.09489502 | 4.67612667 | 4.48E-05   |
| Dienelactone hydrolase family                                                                                                                                 | 822.38914  | 0.44274861 | 0.13567862 | 3.26321571 | 0.00666817 |
| D-alanyl-D-alanine carboxypeptidase                                                                                                                           | 5564.83805 | 0.43939776 | 0.09668491 | 4.54463633 | 7.45E-05   |
| Glutamate transport membrane-spanning protein                                                                                                                 | 2368.50961 | 0.43907876 | 0.11634342 | 3.77398873 | 0.001359   |
| Universal stress protein D                                                                                                                                    | 6040.65595 | 0.43699321 | 0.10195606 | 4.28609336 | 0.00021304 |
| Oligopeptidase A                                                                                                                                              | 10779.4145 | 0.43458992 | 0.1111636  | 3.90946259 | 0.0008458  |
| Peptide transport system permease protein SapC                                                                                                                | 926.86015  | 0.4336782  | 0.13770025 | 3.14943648 | 0.00928282 |
| Ribonucleotide reductase of class Ib (aerobic)%2Cbeta subunit                                                                                                 | 8609.17305 | 0.4326745  | 0.12877019 | 3.36005171 | 0.00507651 |
| Ribonuclease E                                                                                                                                                | 13430.6596 | 0.43228378 | 0.09510128 | 4.54550965 | 7.44E-05   |
| Probable glutathione S-transferase                                                                                                                            | 617.085454 | 0.4322009  | 0.14936591 | 2.89357122 | 0.0176399  |
| Aerobactin siderophore receptor IutA @ TonB-dependent siderophore receptor                                                                                    | 665164.934 | 0.43120166 | 0.1683854  | 2.56800187 | 0.03995693 |
| L-arabinose transport system permease protein (TC 3.A.1.2.2)                                                                                                  | 359.974328 | 0.43086393 | 0.15373086 | 2.80271599 | 0.0223282  |
| Nucleoside permease NupC                                                                                                                                      | 2938.61785 | 0.4301027  | 0.09627847 | 4.46727805 | 0.00010292 |
| PsiE protein                                                                                                                                                  | 1544.81619 | 0.42996738 | 0.11722793 | 3.66778949 | 0.00193253 |
| Yersiniabactin synthetase%2C thiazolinyI reductase component Irp3                                                                                             | 35839.0353 | 0.42991023 | 0.14455587 | 2.9740074  | 0.01439217 |
| C4-type zinc finger protein%2C DksA/Trak family                                                                                                               | 7371.65299 | 0.42897702 | 0.10661075 | 4.0237687  | 0.00056575 |
| 2-amino-3-ketobutyrate coenzyme A ligase                                                                                                                      | 7183.10621 | 0.42893257 | 0.11772001 | 3.64366735 | 0.00209031 |
| L-proline glycine betaine ABC transport system permease protein ProW (TC 3.A.1.12.1)                                                                          | 1843.97681 | 0.42884492 | 0.15809109 | 2.71264444 | 0.02789295 |
| Peptidase B                                                                                                                                                   | 4552.42961 | 0.42813092 | 0.10013769 | 4.27542226 | 0.00022236 |
| Phage tail fiber protein                                                                                                                                      | 306.360958 | 0.42710636 | 0.14587582 | 2.92787636 | 0.01620303 |
| Folate-dependent protein for Fe/S cluster synthesis/repair in oxidative stress                                                                                | 3815.71373 | 0.42706289 | 0.10004543 | 4.26868971 | 0.00022684 |
| FIG00638355: hypothetical protein                                                                                                                             | 4655.16972 | 0.42589696 | 0.16089086 | 2.64711716 | 0.03251552 |
| PTS system%2C galactitol-specific IIC component                                                                                                               | 213.487821 | 0.42515039 | 0.17251417 | 2.46443746 | 0.0494197  |
| Carbonic anhydrase                                                                                                                                            | 3236.36728 | 0.42509801 | 0.17166179 | 2.47636946 | 0.04825825 |
| Alcohol dehydrogenase                                                                                                                                         | 3092.61915 | 0.42277227 | 0.16356835 | 2.5846827  | 0.03773893 |
| Dipeptide transport system permease protein DppC (TC 3.A.1.5.2)                                                                                               | 1014.67431 | 0.42197229 | 0.12508773 | 3.37341068 | 0.00488561 |
| 312.878011                                                                                                                                                    | 0.42105212 | 0.13457559 | 3.12874062 | 0.0097577  |            |
| Putative membrane protein                                                                                                                                     | 11272.6171 | 0.42048718 | 0.12394317 | 3.39258057 | 0.00460298 |
| Respiratory nitrate reductase gamma chain                                                                                                                     | 233.859953 | 0.41754332 | 0.16826609 | 2.48144663 | 0.04772931 |
| Hexuronate utilization operon transcriptional repressor ExuR                                                                                                  | 4572.29855 | 0.41743689 | 0.10356422 | 4.03070565 | 0.00055172 |
| UDP-glucose:(glucosyl)lipopolysaccharide alpha-1%2C3-glucosyltransferase WaaO                                                                                 | 2769.57271 | 0.41677682 | 0.1443162  | 2.88794193 | 0.01786744 |
| Biotin synthesis protein BioC                                                                                                                                 | 2194.65148 | 0.4165623  | 0.13175445 | 3.16165651 | 0.00892433 |
| Outer membrane lipoprotein pcp precursor                                                                                                                      | 12891.5605 | 0.41612304 | 0.11552087 | 3.60214605 | 0.00240898 |
| Ethanolamine utilization protein EutA                                                                                                                         | 279.495054 | 0.416054   | 0.15524178 | 2.68003876 | 0.03004178 |
| Anthranyl synthase%2C aminase component                                                                                                                       | 50901.3109 | 0.41480055 | 0.12533127 | 3.3096333  | 0.00588276 |
| FIG137360: hypothetical protein                                                                                                                               | 1521.9782  | 0.41470397 | 0.10019774 | 4.13885555 | 0.00037325 |
| Glutaredoxin 2                                                                                                                                                | 12587.0185 | 0.4137491  | 0.16441965 | 2.51642128 | 0.04434992 |
| FIG00948312: hypothetical protein                                                                                                                             | 1774.685   | 0.41365311 | 0.13856364 | 2.98529333 | 0.01408456 |
| Endonuclease IV                                                                                                                                               | 953.78359  | 0.41224416 | 0.10247608 | 4.02283297 | 0.00056677 |
| Uncharacterized PLP-dependent aminotransferase YfdZ                                                                                                           | 3449.0628  | 0.41213974 | 0.11013119 | 3.74226186 | 0.00151442 |
| Putative phosphotriesterase                                                                                                                                   | 823.065484 | 0.40906708 | 0.14114571 | 2.89818983 | 0.0175024  |
| Dihydroxy-acid dehydratase                                                                                                                                    | 9855.09434 | 0.40846168 | 0.09886447 | 4.13153149 | 0.00038174 |
| Potassium efflux system KefA protein / Small-conductance mechanosensitive channel                                                                             | 1077.89609 | 0.40819844 | 0.13349995 | 3.05766723 | 0.01169233 |
| Aldo-keto reductase                                                                                                                                           | 260.124184 | 0.40637456 | 0.14612906 | 2.7809292  | 0.02358531 |
| N-ethylmaleimide reductase                                                                                                                                    | 1636.29542 | 0.40495325 | 0.10792269 | 3.75225294 | 0.00147147 |
| UDP-N-acetylmuramoylalanine-D-glutamyl-2%2C-DG-diaminopimelate--D-alanyl-D-alanine ligase                                                                     | 10800.3694 | 0.40452152 | 0.0949396  | 4.26083042 | 0.00023378 |
| Thioredoxin reductase                                                                                                                                         | 6796.12639 | 0.40291308 | 0.11159923 | 3.610357   | 0.00234583 |
| Alkaline phosphatase                                                                                                                                          | 736.890396 | 0.40274912 | 0.11305343 | 3.56246714 | 0.00273519 |
| Dihydroneopterin triphosphate epimerase                                                                                                                       | 902.131327 | 0.40184087 | 0.11342307 | 3.54284956 | 0.00289933 |
| Glucose-1-phosphatase                                                                                                                                         | 4436.28898 | 0.40175039 | 0.13822653 | 2.9064637  | 0.01721033 |
| ABC transporter%2C periplasmic spermidine putrescine-binding protein PotD (TC 3.A.1.11.1)                                                                     | 2702.71523 | 0.39981986 | 0.10664896 | 3.74893368 | 0.00148284 |
| Phage major capsid protein                                                                                                                                    | 648.21835  | 0.39941175 | 0.15162372 | 2.63422994 | 0.03356846 |
| Head-tail preconnector protein GP5                                                                                                                            | 786.0946   | 0.39928028 | 0.1167954  | 3.41863025 | 0.00423379 |
| 6-phospho-beta-glucosidase                                                                                                                                    | 5235.91818 | 0.39753043 | 0.08589689 | 4.62799549 | 5.45E-05   |
| FIG00638703: hypothetical protein                                                                                                                             | 1828.02557 | 0.39721129 | 0.08693328 | 4.569151   | 6.79E-05   |
| Inner membrane protein YphA                                                                                                                                   | 3594.56151 | 0.3958387  | 0.14824192 | 2.67022108 | 0.03074089 |
| Predicted exported alpha-N-acetylgalactosaminidase                                                                                                            | 2691.27425 | 0.39531982 | 0.12458656 | 3.17305359 | 0.00864639 |
| Putative exported protein                                                                                                                                     | 3584.81863 | 0.393911   | 0.11278275 | 3.49265287 | 0.00338809 |
| hypothetical tRNA/tRNA methyltransferase yfiF                                                                                                                 | 2383.61581 | 0.39230849 | 0.1115737  | 3.51613759 | 0.00316457 |
| L-aspartate oxidase                                                                                                                                           | 7405.48237 | 0.39190232 | 0.13333331 | 2.93926778 | 0.01573454 |
| putative transport                                                                                                                                            | 773.502472 | 0.39131462 | 0.13127742 | 2.98082195 | 0.01418917 |
| FIG00637900: hypothetical protein                                                                                                                             | 1313.64197 | 0.39130772 | 0.10143619 | 3.85767346 | 0.0010237  |

|                                                                                                                                                 |            |             |            |            |            |
|-------------------------------------------------------------------------------------------------------------------------------------------------|------------|-------------|------------|------------|------------|
| Biotin synthase                                                                                                                                 | 2133.73021 | 0.38858956  | 0.11932925 | 3.25644849 | 0.00680193 |
| Ferrichrome-iron receptor                                                                                                                       | 3111.27662 | 0.38780617  | 0.09913365 | 3.91195305 | 0.00084028 |
| UDP-glucose:(glucosyl)lipopolysaccharide alpha-1%2C2-glucosyltransferase                                                                        | 2749.06834 | 0.38477126  | 0.13339712 | 2.88440462 | 0.01803275 |
| Succinyl-CoA synthetase%2C alpha subunit-related enzymes                                                                                        | 5298.82325 | 0.38375607  | 0.13711188 | 2.79885363 | 0.02255319 |
| Leucine-responsive regulatory protein%2C regulator for leucine (or lrp) regulon and high-affinity branched-chain amino acid transport system    | 7235.38262 | 0.38285025  | 0.15261578 | 2.5085889  | 0.04508502 |
| Cytosine deaminase                                                                                                                              | 322.012506 | 0.38206705  | 0.14058403 | 2.71771293 | 0.02754545 |
| NAD(P)HX epimerase / NAD(P)HX dehydratase                                                                                                       | 3585.65554 | 0.37623199  | 0.13332349 | 2.8219483  | 0.02128032 |
| Copper-sensing two-component system response regulator CpxR                                                                                     | 4985.9851  | 0.37555163  | 0.11480108 | 3.27132484 | 0.00651465 |
| COG0699: Predicted GTPases (dynam-in-related)                                                                                                   | 679.071126 | 0.37271223  | 0.14917144 | 2.49854943 | 0.04611764 |
| Dipeptide-binding ABC transporter%2C periplasmic substrate-binding component (TC 3.A.1.5.2)%3B Putative hemin-binding lipoprotein               | 3670.86038 | 0.37026986  | 0.10408501 | 3.55737942 | 0.00277502 |
| Ribonucleotide reductase of class 1b (aerobic)%2C alpha subunit                                                                                 | 15397.4363 | 0.36943584  | 0.13745411 | 2.68770317 | 0.02950264 |
| Multidrug transporter MdtC                                                                                                                      | 880.082375 | 0.368964    | 0.13829472 | 2.66795441 | 0.03087782 |
| Transcriptional regulator%2C GntR family                                                                                                        | 906.82304  | 0.36828146  | 0.12975154 | 2.83835915 | 0.02035637 |
| Oxidoreductase (putative)                                                                                                                       | 595.396297 | 0.36805313  | 0.14148807 | 2.60130143 | 0.03629968 |
| UDP-sugar hydrolase                                                                                                                             | 3991.03917 | 0.36580567  | 0.12246384 | 2.98705037 | 0.01403464 |
| TonB-dependent hemin %2C ferrichrome receptor                                                                                                   | 121631.308 | 0.36553449  | 0.11120473 | 3.28704096 | 0.00624558 |
| Universal stress protein F                                                                                                                      | 2490.19556 | 0.36492493  | 0.14621878 | 2.49574595 | 0.04633254 |
| NADPH-dependent broad range aldehyde dehydrogenase YqhD                                                                                         | 1419.77451 | 0.36420265  | 0.11797633 | 3.08708238 | 0.01079464 |
| Cell division inhibitor                                                                                                                         | 2148.20243 | 0.3636589   | 0.11709754 | 3.10560665 | 0.01032641 |
| Protein ImpG/VasA                                                                                                                               | 1241.88724 | 0.36249076  | 0.11720062 | 3.09290826 | 0.0106603  |
| FIG00639264: hypothetical protein                                                                                                               | 2005.25057 | 0.36195491  | 0.0943573  | 3.83600336 | 0.00192829 |
| Endoglucanase precursor                                                                                                                         | 5034.57107 | 0.36103035  | 0.08363046 | 4.31697185 | 0.00018874 |
| Proline/sodium symporter PutP (TC 2.A.2.1.2.1) @ Propionate/sodium symporter                                                                    | 1914.07318 | 0.3598731   | 0.11820008 | 3.04460952 | 0.01205871 |
| 33 kDa chaperonin (Heat shock protein 33) (HSP33)                                                                                               | 1544.42034 | 0.35741661  | 0.10889286 | 3.28227783 | 0.00630913 |
| Aerobic respiration control protein arcA                                                                                                        | 10836.2333 | 0.35623853  | 0.12475574 | 2.85548808 | 0.01946347 |
| Exodeoxyribonuclease V alpha chain                                                                                                              | 2842.43835 | 0.35320853  | 0.11108885 | 3.1795137  | 0.0084774  |
| Integration host factor beta subunit                                                                                                            | 4694.0861  | 0.35299561  | 0.13518992 | 2.61110893 | 0.03555079 |
| Biosynthetic Aromatic amino acid aminotransferase alpha                                                                                         | 2781.73315 | 0.35206131  | 0.11869542 | 2.96609014 | 0.01467284 |
| Putative minor tail protein                                                                                                                     | 327.139611 | 0.35114234  | 0.14087404 | 2.49259792 | 0.04659378 |
| Lipopolysaccharide core biosynthesis protein WaaP                                                                                               | 2275.31164 | 0.35042292  | 0.12122858 | 2.89059664 | 0.01776499 |
| Phosphoenolpyruvate-dihydroxyacetone phosphotransferase                                                                                         | 1567.74285 | 0.34994495  | 0.11312266 | 3.09350006 | 0.0106603  |
| Glucose-1-phosphate adenyltransferase                                                                                                           | 25115.2158 | 0.3479794   | 0.13049773 | 2.66555511 | 0.03093982 |
| COG2005: N-terminal domain of molybdenum-binding protein                                                                                        | 3908.44762 | 0.3477448   | 0.13613091 | 2.55448815 | 0.04058619 |
| Type I secretion outer membrane protein%2C TolC precursor                                                                                       | 11306.2219 | 0.34756723  | 0.10153302 | 3.423194   | 0.00416952 |
| NAD(P) transhydrogenase alpha subunit                                                                                                           | 9983.75347 | 0.34754371  | 0.10811033 | 3.21471315 | 0.00763905 |
| CFA/I fimbrial major subunit                                                                                                                    | 2407.7359  | 0.34645523  | 0.13597794 | 2.54787828 | 0.04115546 |
| Mannitol-1-phosphate 5-dehydrogenase                                                                                                            | 2552.45772 | 0.34146442  | 0.12396417 | 2.75454118 | 0.0252591  |
| Zinc transporter ZupT                                                                                                                           | 2740.84224 | 0.33990692  | 0.10313454 | 3.28994453 | 0.00619835 |
| NAD-dependent malic enzyme                                                                                                                      | 13031.7786 | 0.33810208  | 0.08515919 | 3.97023599 | 0.00068106 |
| Uncharacterized protein YhjG                                                                                                                    | 3117.75351 | 0.33808595  | 0.11640396 | 2.90441975 | 0.01726931 |
| Threonine dehydratase biosynthetic                                                                                                              | 6341.42057 | 0.33799374  | 0.10957404 | 3.08461511 | 0.01085899 |
| Sensory histidine kinase BaeS                                                                                                                   | 707.163136 | 0.33628665  | 0.12140923 | 2.76986067 | 0.0243086  |
| Cation transport protein chaC                                                                                                                   | 4194.57001 | 0.33564548  | 0.10694029 | 3.13862513 | 0.00953671 |
| Putative inner membrane protein                                                                                                                 | 363.400653 | 0.33561198  | 0.13617661 | 2.46453466 | 0.0494197  |
| Ferredoxin-NADP(+) reductase                                                                                                                    | 2537.41444 | 0.33302898  | 0.10436049 | 3.19114052 | 0.00818502 |
| Peptide transport system ATP-binding protein SapF                                                                                               | 1106.25809 | 0.33267857  | 0.11166415 | 2.97927823 | 0.01423914 |
| Aldo-keto reductase                                                                                                                             | 2872.89569 | 0.33190288  | 0.12727619 | 2.60773744 | 0.03577849 |
| Universal stress protein G                                                                                                                      | 18960.6928 | 0.33175761  | 0.09336322 | 3.55340778 | 0.00280352 |
| Glycerol kinase                                                                                                                                 | 1468.29804 | 0.33040174  | 0.0972417  | 3.39773728 | 0.00453705 |
| Phosphoribosyl-AMP cyclohydrolase                                                                                                               | 3322.8656  | 0.3303115   | 0.1104111  | 2.99165129 | 0.01390124 |
| Alpha-2-macroglobulin                                                                                                                           | 16164.3005 | 0.32985934  | 0.08907713 | 3.70307532 | 0.00172148 |
| Allophanate hydrolase 2 subunit 1                                                                                                               | 4079.49244 | 0.32895991  | 0.09381375 | 3.50652107 | 0.00325706 |
| Putative oxidoreductase                                                                                                                         | 4170.36608 | 0.32832661  | 0.13244065 | 2.47904712 | 0.04797442 |
| putative capsid protein of prophage                                                                                                             | 771.565706 | 0.32717073  | 0.10646022 | 3.07317365 | 0.01121822 |
| Cell division inhibitor                                                                                                                         | 1986.58028 | 0.32587843  | 0.09430967 | 3.45540833 | 0.00378035 |
| Putative deoxyribonuclease YjiV                                                                                                                 | 984.326996 | 0.32146025  | 0.10438154 | 3.07966555 | 0.01102811 |
| Zinc transporter ZitB                                                                                                                           | 952.625088 | 0.32055822  | 0.11727415 | 2.73340908 | 0.02648668 |
| Protein export cytoplasm chaperone protein (SecB%2Cmaintains protein to be exported in unfolded state)                                          | 364.7972   | 0.31734556  | 0.07784051 | 4.07686899 | 0.00046196 |
| Trilactone hydrolase IroD                                                                                                                       | 29549.542  | 0.31716285  | 0.10013712 | 3.16728564 | 0.00878715 |
| Putative ABC transporter ATP-binding protein                                                                                                    | 1598.17271 | 0.31517834  | 0.11722781 | 2.68859692 | 0.02946959 |
| Sodium/glutamate symport protein                                                                                                                | 2345.70563 | 0.31329563  | 0.11020234 | 2.84291279 | 0.02008769 |
| FIG00905232: hypothetical protein                                                                                                               | 900.43022  | 0.31266784  | 0.10536059 | 2.96759766 | 0.01463248 |
| Kup system potassium uptake protein                                                                                                             | 961.484909 | 0.31254692  | 0.10725831 | 2.9139647  | 0.01685468 |
| DJ-1/YajL/PfpI superfamily%2C includes chaperone protein YajL (former ThiJ)%2C parkinsonism-associated protein DJ-1%2C peptidases PfpI%2C Hsp31 | 2438.93029 | 0.31149794  | 0.10710281 | 2.90840126 | 0.01713965 |
| Carbon starvation protein A                                                                                                                     | 7856.40953 | 0.3094549   | 0.11781351 | 2.62665035 | 0.03415153 |
| Outer membrane protein H precursor                                                                                                              | 10553.0962 | 0.30734058  | 0.08910318 | 3.44926614 | 0.00384793 |
| Pyruvate formate-lyase                                                                                                                          | 683.739988 | 0.30723985  | 0.12267077 | 2.50458893 | 0.04556067 |
| Anthranyl phosphate transferase like                                                                                                            | 6667.04225 | 0.3036475   | 0.08713299 | 3.48487425 | 0.00344506 |
| Phosphate starvation-inducible ATPase PhoH with RNA binding motif                                                                               | 8740.90495 | 0.30000817  | 0.09982325 | 3.00539384 | 0.01337692 |
| Uncharacterized ABC transporter%2C auxiliary component YrC                                                                                      | 3379.93046 | 0.29446597  | 0.10026536 | 2.93686664 | 0.01584019 |
| FIG00639949: hypothetical protein                                                                                                               | 1599.03357 | 0.29362095  | 0.11892419 | 2.46897578 | 0.04895289 |
| Metal-dependent hydrolase YbeY%2C involved in rRNA and/or ribosome maturation and assembly                                                      | 4451.46932 | 0.29225368  | 0.10688769 | 2.73421271 | 0.02646603 |
| Phage tail fiber protein                                                                                                                        | 992.66438  | 0.29127641  | 0.11215913 | 2.59699254 | 0.0366319  |
| Allophanate hydrolase 2 subunit 2                                                                                                               | 6627.57208 | 0.28830577  | 0.08662246 | 3.28302666 | 0.00555634 |
| ADP-heptose synthase                                                                                                                            | 4859.45148 | 0.28772567  | 0.09679243 | 2.97260502 | 0.0141139  |
| Glutamate synthase [NADPH] large chain                                                                                                          | 24998.6417 | 0.28757755  | 0.10779795 | 2.6774615  | 0.03087782 |
| Citrate:6-N-acetyl-6-N-hydroxy-L-lysine ligase%2C alpha subunit                                                                                 | 72421.5159 | 0.28664685  | 0.10465681 | 2.7389222  | 0.02614407 |
| Protein ydcF                                                                                                                                    | 765.871304 | 0.2852409   | 0.09913885 | 2.8771858  | 0.01839453 |
| N6-hydroxylysine O-acetyltransferase                                                                                                            | 43587.9085 | 0.28430422  | 0.10266663 | 2.76919803 | 0.02433483 |
| Acyllorithine deacetylase                                                                                                                       | 2533.1881  | 0.28312461  | 0.09032283 | 3.13458535 | 0.0096108  |
| FIG00732392: hypothetical protein                                                                                                               | 1492.05078 | 0.2825882   | 0.09884845 | 2.85880253 | 0.01928054 |
| Uncharacterized protein conserved in bacteria                                                                                                   | 1292.21976 | 0.27802089  | 0.11057486 | 2.51432284 | 0.04450032 |
| PTS IIa-like nitrogen-regulatory protein PtsN                                                                                                   | 2511.7562  | 0.27743452  | 0.09326874 | 2.97457141 | 0.01438127 |
| Decarboxylase family protein                                                                                                                    | 15099.976  | 0.27565263  | 0.10451827 | 2.63736318 | 0.03228917 |
| Cob(I)alamin adenosyltransferase                                                                                                                | 1085.38936 | 0.27511589  | 0.11040345 | 2.49191386 | 0.04664581 |
| Cys regulon transcriptional activator CysB                                                                                                      | 2530.00864 | 0.27471799  | 0.10177934 | 2.69915293 | 0.02883683 |
| Deoxyguanosinetriphosphate triphosphohydrolase                                                                                                  | 1442.61976 | 0.27336662  | 0.08954871 | 3.05271423 | 0.01184595 |
| Tail fiber assembly protein                                                                                                                     | 963.584289 | 0.27308884  | 0.10663569 | 2.56095152 | 0.03995693 |
| Virulence factor MviM                                                                                                                           | 3475.76851 | 0.27028623  | 0.10395652 | 2.59999293 | 0.036407   |
| FIG00639467: hypothetical protein                                                                                                               | 3653.81843 | 0.26529695  | 0.10386727 | 2.55419195 | 0.04058657 |
| Putative oxidoreductase                                                                                                                         | 1432.78258 | 0.2619519   | 0.0963745  | 2.71806238 | 0.02754183 |
| Phosphodiesterase yfcE                                                                                                                          | 1199.33021 | 0.2599605   | 0.10043569 | 2.58832783 | 0.03743778 |
| Uncharacterized protein yhaV                                                                                                                    | 1875.02658 | 0.25676618  | 0.10357356 | 2.47907086 | 0.04797442 |
| D-cysteine desulfhydrase                                                                                                                        | 4139.45158 | 0.25301974  | 0.10257203 | 2.46675185 | 0.04917958 |
| Hemin transport protein HmuS                                                                                                                    | 50669.0538 | 0.24337105  | 0.09057358 | 2.68699828 | 0.02950264 |
| Universal stress protein E                                                                                                                      | 17839.5434 | 0.23786677  | 0.09413102 | 2.5269754  | 0.04332514 |
| Lipoprotein YcmF%2C part of a salvage pathway of unknown substrate                                                                              | 3274.75402 | 0.23022664  | 0.07217226 | 3.18996019 | 0.00820086 |
| ATP-dependent Clp protease proteolytic subunit                                                                                                  | 9227.02333 | 0.22221429  | 0.07328421 | 3.03222609 | 0.01250752 |
| Protein of unknown function YceH                                                                                                                | 3515.21561 | 0.20567957  | 0.08355639 | 2.46156611 | 0.04963642 |
| Peptide deformylase                                                                                                                             | 3566.81895 | -0.2111542  | 0.08182493 | -2.5805612 | 0.0381273  |
| Arabinose 5-phosphate isomerase                                                                                                                 | 2427.98721 | -0.22776115 | 0.08920756 | -2.5514823 | 0.04080059 |
| GTP-binding protein EngA                                                                                                                        | 3024.16832 | -0.2416301  | 0.09757351 | -2.4763903 | 0.04825825 |
| Replicative DNA helicase                                                                                                                        | 2044.61918 | -0.2421289  | 0.09672377 | -2.5033029 | 0.04568912 |
| Protein-L-isospartate O-methyltransferase                                                                                                       | 1318.07511 | -0.24288    | 0.09727394 | -2.496866  | 0.04625805 |
| UDP-3-O-(3-hydroxymristoyl) glucosamine N-acyltransferase                                                                                       | 12864.3395 | -0.2430837  | 0.09871284 | -2.4625334 | 0.04960408 |
| Phosphatidate cytidyltransferase                                                                                                                | 1962.73065 | -0.2469068  | 0.09340516 | -2.6433963 | 0.03281709 |
| Per-activated serine protease autotransporter enterotoxin EspC                                                                                  | 3169.43608 | -0.2480679  | 0.07069484 | -3.5089961 | 0.00323201 |
| Translation elongation factor LepA                                                                                                              | 3942.01437 | -0.248187   | 0.09940811 | -2.4966477 | 0.04625805 |
| 3-polypropenyl-4-hydroxybenzoate carboxy-lyase                                                                                                  | 4379.80761 | -0.2502879  | 0.10084327 | -2.4819494 | 0.04770039 |

|                                                                                                                                  |            |            |            |            |            |
|----------------------------------------------------------------------------------------------------------------------------------|------------|------------|------------|------------|------------|
| Lipoprotein releasing system transmembrane protein LpE                                                                           | 2192.38781 | -0.257445  | 0.08586433 | -2.9982769 | 0.01364778 |
| Diaminohydroxyphosphoribosylamino-pyrimidine deaminase                                                                           | 3562.97959 | -0.2580045 | 0.09622391 | -2.6812934 | 0.0295634  |
| Nucleoid-associated protein NdpA                                                                                                 | 714.135391 | -0.264039  | 0.10623985 | -2.4853102 | 0.04736679 |
| Arginine ABC transporter%2C permease protein ArtQ                                                                                | 2497.49701 | -0.2651823 | 0.09659758 | -2.7452269 | 0.02572801 |
| 3-oxoacyl-[acyl-carrier-protein] synthase%2C KASII                                                                               | 15282.951  | -0.2682497 | 0.096377   | -2.7833374 | 0.02345596 |
| Lipopolysaccharide ABC transporter%2C ATP-binding protein LptB                                                                   | 3082.22687 | -0.2686429 | 0.098337   | -2.7318601 | 0.02656202 |
| TrkA%2C Potassium channel-family protein                                                                                         | 2280.23628 | -0.2779617 | 0.10948081 | -2.5389075 | 0.04208492 |
| Putative capsular polysaccharide transport protein YegH                                                                          | 2525.49731 | -0.2789117 | 0.09245528 | -3.0167204 | 0.01304676 |
| ABC transporter multidrug efflux pump%2C fused ATP-binding domains                                                               | 17611.7659 | -0.2792161 | 0.10347583 | -2.6983699 | 0.02885196 |
| Cobalt-zinc-cadmium resistance protein                                                                                           | 1776.93698 | -0.2799805 | 0.10550166 | -2.6538014 | 0.03199149 |
| Erythritol transcriptional regulator EryD                                                                                        | 2067.57423 | -0.2802643 | 0.11149135 | -2.5137763 | 0.04450032 |
| 1-deoxy-D-xylulose 5-phosphate reductoisomerase                                                                                  | 1812.74813 | -0.2806275 | 0.11390826 | -2.4636277 | 0.04949217 |
| Single-stranded-DNA-specific exonuclease RecJ                                                                                    | 2834.02488 | -0.2810256 | 0.09415222 | -2.9848006 | 0.01409181 |
| Ferric enterobactin transport ATP-binding protein FepC (TC 3.A.1.14.2)                                                           | 1915.33755 | -0.2821456 | 0.10000401 | -2.821343  | 0.02129958 |
| Histidyl-tRNA synthetase                                                                                                         | 5334.70146 | -0.2835926 | 0.09037905 | -3.1378139 | 0.0095513  |
| Methionyl-tRNA formyltransferase                                                                                                 | 3972.07394 | -0.2843364 | 0.08539891 | -3.3295085 | 0.00554789 |
| Oxapatryl diphosphate synthase                                                                                                   | 2348.6002  | -0.2870371 | 0.09358401 | -3.0671596 | 0.01139318 |
| ATP-dependent helicase HrpB                                                                                                      | 2086.75936 | -0.2871325 | 0.09804765 | -2.9284995 | 0.01618754 |
| Tail-specific protease precursor                                                                                                 | 8358.14633 | -0.2902913 | 0.10144596 | -2.8615362 | 0.01917256 |
| Siroheme synthase / Precorrin-2 oxidase                                                                                          | 975.472677 | -0.2917903 | 0.10704008 | -2.7259909 | 0.02701386 |
| Macrolide export ATP-binding/permease protein MacB                                                                               | 1925.70797 | -0.2935998 | 0.09965183 | -2.9462555 | 0.01549783 |
| Dihydrofolate synthase                                                                                                           | 983.611077 | -0.2936667 | 0.09905847 | -2.9645791 | 0.01472156 |
| CysteinyI-tRNA synthetase                                                                                                        | 1715.77138 | -0.294965  | 0.0981369  | -3.0056486 | 0.01337692 |
| mobilization protein                                                                                                             | 4242.62165 | -0.2953154 | 0.08404466 | -3.5137907 | 0.00318433 |
| N-acetylglucosamine-1-phosphate uridylyltransferase                                                                              | 3549.80828 | -0.295952  | 0.09093808 | -3.2504749 | 0.00689147 |
| Dephospho-CoA kinase                                                                                                             | 941.119644 | -0.2970105 | 0.10620849 | -2.7964855 | 0.02263168 |
| N-acetylmuramoyl-L-alanine amidase                                                                                               | 1190.0491  | -0.2978283 | 0.11120811 | -2.6781165 | 0.03016721 |
| CTP synthase                                                                                                                     | 17574.5916 | -0.2981852 | 0.10589449 | -2.8158704 | 0.02160213 |
| Two-component sensor protein RcsC                                                                                                | 1723.52738 | -0.3014    | 0.09230918 | -3.2651138 | 0.00663296 |
| Cell division protein FtsA                                                                                                       | 6860.22694 | -0.3053249 | 0.1134169  | -2.692058  | 0.02929673 |
| Enoyl-[acyl-carrier-protein] reductase [NADH]                                                                                    | 4344.69328 | -0.3082947 | 0.10895872 | -2.8294632 | 0.02084842 |
| 1-deoxy-D-xylulose 5-phosphate synthase                                                                                          | 1570.01366 | -0.3099144 | 0.0899958  | -3.1305813 | 0.00972707 |
| 23S rRNA (guanosine-2'-O)-methyltransferase rImB                                                                                 | 3013.06721 | -0.3116581 | 0.11201139 | -2.7823783 | 0.0235028  |
| Inorganic pyrophosphatase                                                                                                        | 2973.35257 | -0.3124914 | 0.12046561 | -2.5940299 | 0.03691736 |
| Thiamine-monophosphate kinase                                                                                                    | 1153.54481 | -0.3134073 | 0.10741504 | -2.9177224 | 0.01668768 |
| FIG001881: hydrolase of alkaline phosphatase superfamily                                                                         | 1844.82455 | -0.3148389 | 0.09736724 | -3.2335204 | 0.00723751 |
| ATP synthase B chain                                                                                                             | 5984.05388 | -0.3153332 | 0.09879611 | -3.1917574 | 0.00817797 |
| UDP-glucose dehydrogenase                                                                                                        | 2006.83238 | -0.3160118 | 0.11456515 | -2.758359  | 0.02503714 |
| Methyl-directed repair DNA adenine methylase                                                                                     | 1159.29132 | -0.3164483 | 0.10801189 | -2.9297541 | 0.01615662 |
| Succinate dehydrogenase flavoprotein subunit                                                                                     | 493.962692 | -0.3165248 | 0.12549756 | -2.5221593 | 0.04385612 |
| tRNA pseudouridine synthase A                                                                                                    | 1887.35024 | -0.3182781 | 0.10985941 | -2.89714   | 0.01751201 |
| GMP synthase [glutamine-hydrolyzing]%2Camidotransferase subunit                                                                  | 4251.53701 | -0.3185239 | 0.10125276 | -3.1458295 | 0.0093746  |
| Guanylate kinase                                                                                                                 | 3532.48379 | -0.3187425 | 0.10686058 | -2.9827885 | 0.01413833 |
| Negative regulator of allantoin and glyoxylate utilization operons                                                               | 5414.91526 | -0.3195016 | 0.10635268 | -3.0041704 | 0.01341591 |
| Transcriptional regulator%2C GntR family domain / Aspartate aminotransferase                                                     | 1069.25631 | -0.3196477 | 0.10176708 | -3.1409738 | 0.00948406 |
| Lysophospholipase L2                                                                                                             | 1558.98966 | -0.3207828 | 0.11800492 | -2.7183848 | 0.02754048 |
| LSU ribosomal protein L36p                                                                                                       | 2508.84459 | -0.3230265 | 0.12275265 | -2.6315236 | 0.03380732 |
| Sensor kinase CiteA%2C DpiB                                                                                                      | 716.647677 | -0.3240607 | 0.10431153 | -3.1066623 | 0.01032358 |
| TsaD/Kae1/Orf7 protein%2C required for threonylcarbamoyladenosine t(6)A37 formation in tRNA                                      | 995.519641 | -0.324418  | 0.12116605 | -2.6774661 | 0.03016721 |
| DNA polymerase III beta subunit                                                                                                  | 2093.65743 | -0.325939  | 0.09705694 | -3.3582247 | 0.00509554 |
| putative alpha helix protein                                                                                                     | 700.533476 | -0.3260937 | 0.13196105 | -2.4711359 | 0.04873584 |
| Uncharacterized acetyltransferase YjgM                                                                                           | 464.036068 | -0.3275551 | 0.13307418 | -2.4614475 | 0.04963642 |
| GTP pyrophosphokinase                                                                                                            | 6226.87523 | -0.3297944 | 0.0925191  | -3.5646091 | 0.00271741 |
| tRNA (5-methoxyuridine) 34 synthase                                                                                              | 1784.42246 | -0.330685  | 0.12987973 | -3.5460865 | 0.0413327  |
| LPS-assembly lipoprotein RlpB precursor (Rare lipoprotein B)                                                                     | 3613.32102 | -0.3317455 | 0.10845564 | -3.0588126 | 0.0116612  |
| FIG021862: membrane protein%2C exporter                                                                                          | 1349.93672 | -0.3317532 | 0.11057342 | -3.0002979 | 0.0135726  |
| regulator of length of O-antigen component of lipopolysaccharide chains                                                          | 1974.88607 | -0.331989  | 0.09952729 | -3.3356582 | 0.00545733 |
| Heat shock (predicted periplasmic) protein YcM%2C precursor                                                                      | 2453.73308 | -0.3332624 | 0.12055882 | -2.7643135 | 0.02466967 |
| Radical SAM family protein HutW%2C similar to coproporphyrinogen III oxidase%2Coxygen-independent%2C associated with heme uptake | 8274.20449 | -0.3343851 | 0.12416641 | -2.6930396 | 0.02923722 |
| UDP-N-acetylglucosamine 1-carboxyvinyltransferase                                                                                | 1607.16978 | -0.3347149 | 0.10842187 | -3.0871534 | 0.01079464 |
| (3R)-hydroxymyristoyl-[acyl carrier protein] dehydratase                                                                         | 3441.52865 | -0.3356062 | 0.11891495 | -2.8222372 | 0.02128032 |
| DNA-directed RNA polymerase alpha subunit                                                                                        | 37339.433  | -0.3358465 | 0.10878654 | -3.087206  | 0.01079464 |
| Arginine ABC transporter%2C permease protein ArtM                                                                                | 1287.17123 | -0.3365325 | 0.09775022 | -3.4427794 | 0.00391972 |
| S-adenosylmethionine decarboxylase preenzym                                                                                      | 1687.38694 | -0.3384595 | 0.11348633 | -2.9823812 | 0.01414171 |
| Putative DNA processing chain A                                                                                                  | 850.495311 | -0.3407231 | 0.12771917 | -2.6677524 | 0.03087782 |
| Undecaprenyl-phosphate N-acetylglucosaminyl 1-phosphate transferase                                                              | 1516.98029 | -0.3407243 | 0.1191146  | -2.8604743 | 0.01921761 |
| UDP-N-acetylmuramate-L-alanyl-gamma-D-glutamyl-meso-diaminopimelate ligase                                                       | 1961.35616 | -0.34166   | 0.12599527 | -2.7116891 | 0.02792199 |
| Proline-specific permease proY                                                                                                   | 1097.36704 | -0.34263   | 0.10721414 | -3.195754  | 0.00808617 |
| Putative ATPase component of ABC transporter with duplicated ATPase domain                                                       | 2054.96573 | -0.3426927 | 0.11357783 | -3.01725   | 0.01303867 |
| Transport ATP-binding protein CydC                                                                                               | 2549.14784 | -0.3427741 | 0.11087338 | -3.0915817 | 0.01068611 |
| FIG00638108: hypothetical protein                                                                                                | 1220.14244 | -0.343541  | 0.13188475 | -2.6048577 | 0.03601823 |
| Biotin carboxyl carrier protein of acetyl-CoA carboxylase                                                                        | 2298.80722 | -0.343594  | 0.10623835 | -3.2341807 | 0.00723023 |
| DedA protein                                                                                                                     | 657.649401 | -0.3440668 | 0.11093046 | -3.1016443 | 0.01041246 |
| DNA recombination and repair protein RecO                                                                                        | 1610.16568 | -0.3449583 | 0.11091707 | -3.1100561 | 0.01023031 |
| Phosphatase YidA                                                                                                                 | 2895.52267 | -0.3455264 | 0.11539306 | -2.9943432 | 0.01379441 |
| Periplasmic esterase IroE                                                                                                        | 4491.76123 | -0.3459116 | 0.13367753 | -2.5876574 | 0.03747863 |
| FIG143263: Glycosyl transferase / Lysophospholipid acyltransferase                                                               | 2119.98047 | -0.3461335 | 0.11769586 | -2.940915  | 0.01566764 |
| DNA polymerase III subunits gamma and tau                                                                                        | 1875.44398 | -0.3464444 | 0.09914935 | -3.4941671 | 0.0033742  |
| Transcriptional regulator%2C TetR family                                                                                         | 685.441197 | -0.3478279 | 0.13505947 | -2.5753682 | 0.03860586 |
| Transcription repressor                                                                                                          | 477.120408 | -0.3497357 | 0.13973272 | -2.5028907 | 0.04570494 |
| Crotonobetaine carnitine-CoA ligase                                                                                              | 550.951222 | -0.3505397 | 0.13156697 | -2.6643439 | 0.03111625 |
| RNA:NAD 2'-phosphotransferase                                                                                                    | 440.136398 | -0.3515168 | 0.12147115 | -2.8938297 | 0.0176399  |
| Transcriptional regulator%2C LacI family                                                                                         | 1841.09868 | -0.3527982 | 0.12190599 | -2.8940285 | 0.0176399  |
| 843.07134                                                                                                                        | -0.3533557 | 0.13845406 | -2.5521514 | 0.04075651 |            |
| ATP-dependent DNA helicase RecQ                                                                                                  | 738.45156  | -0.3540788 | 0.12655776 | -2.7977646 | 0.02260744 |
| Hemolysins and related proteins containing CBS domains                                                                           | 931.87352  | -0.3543157 | 0.12078057 | -2.933549  | 0.01597679 |
| Ribokinase                                                                                                                       | 827.496151 | -0.3546802 | 0.13830533 | -2.5644723 | 0.03967031 |
| Mir7403 protein                                                                                                                  | 3121.13906 | -0.3572431 | 0.12076143 | -2.9582552 | 0.01495475 |
| Putative ATP-binding component of a transport system                                                                             | 757.873836 | -0.3576655 | 0.13303138 | -2.6885804 | 0.02946959 |
| Lysine-specific permease                                                                                                         | 1830.19816 | -0.3578647 | 0.11471623 | -3.1195651 | 0.00997801 |
| Glutamate synthase [NADPH] small chain                                                                                           | 240.127758 | -0.3589645 | 0.14516324 | -2.4728334 | 0.04854742 |
| 4-hydroxythreonine-4-phosphate dehydrogenase                                                                                     | 2825.78284 | -0.3602042 | 0.10606843 | -3.3959606 | 0.00455988 |
| Mn-dependent transcriptional regulator MntR                                                                                      | 434.927621 | -0.3607868 | 0.14351333 | -2.5139601 | 0.04450032 |
| Putative permease                                                                                                                | 885.858594 | -0.3613553 | 0.13001299 | -2.7793782 | 0.02365284 |
| Ribosome recycling factor                                                                                                        | 6223.04501 | -0.3628595 | 0.13807481 | -2.627992  | 0.0340946  |
| tRNA (uridine-5-oxacyclic acid methyl ester) 34 synthase                                                                         | 688.693032 | -0.3631142 | 0.13824546 | -2.6265905 | 0.03415153 |
| Chaperone protein HscA                                                                                                           | 5334.96913 | -0.3644543 | 0.13907563 | -2.6205478 | 0.03464174 |
| GDDEF/EAL domain protein YjhH                                                                                                    | 1287.79487 | -0.3648129 | 0.14046484 | -2.5971831 | 0.0366319  |
| Cell volume regulation protein A                                                                                                 | 2456.37162 | -0.3649466 | 0.10428882 | -3.4993839 | 0.0033297  |
| Preprotein translocase subunit YajC (TC 3.A.5.1.1)                                                                               | 1223.28176 | -0.3696381 | 0.12962233 | -2.8516544 | 0.01964087 |
| Putative membrane protein                                                                                                        | 356.281465 | -0.3709061 | 0.12245673 | -3.0288751 | 0.01263273 |
| Putative transport protein                                                                                                       | 367.824863 | -0.3714695 | 0.11815893 | -3.1438121 | 0.00942769 |
| Methionine aminopeptidase                                                                                                        | 2909.26627 | -0.371499  | 0.14529757 | -2.5568151 | 0.04034968 |
| DedA family inner membrane protein YghB                                                                                          | 1238.41505 | -0.3715263 | 0.13242619 | -2.805535  | 0.02217767 |
| Flagellar hook-associated protein FlgK                                                                                           | 13092.2058 | -0.3718597 | 0.15034618 | -2.4733565 | 0.04854742 |
| Translation elongation factor P                                                                                                  | 1785.40411 | -0.3739858 | 0.14253572 | -2.6238038 | 0.03440217 |
| Intramembrane protease RasP/MytC%2C implicated in cell division based on FtsL cleavage                                           | 5497.80479 | -0.3763198 | 0.09030667 | -4.1671314 | 0.00033795 |
| Helicase PriA essential for oriC/DnaA-independent DNA replication                                                                | 985.557407 | -0.3766045 | 0.15313669 | -2.45927   | 0.04989904 |
| Putative membrane protein YehI                                                                                                   | 435.300601 | -0.3791093 | 0.14950698 | -2.5357297 | 0.04239793 |

|                                                                                                                                      |            |            |            |            |            |
|--------------------------------------------------------------------------------------------------------------------------------------|------------|------------|------------|------------|------------|
| Transport ATP-binding protein CydD                                                                                                   | 1519.19925 | -0.3795236 | 0.13805272 | -2.749121  | 0.02558363 |
| Formyltetrahydrofolate deformylase                                                                                                   | 2021.73119 | -0.380133  | 0.14377577 | -2.6439293 | 0.03279438 |
| Flagellar motor rotation protein MotB                                                                                                | 6405.18855 | -0.3821519 | 0.10107438 | -3.7808977 | 0.00133428 |
| Mobile element protein                                                                                                               | 307.368263 | -0.3836188 | 0.15344175 | -2.5000943 | 0.0459545  |
| hypothetical protein                                                                                                                 | 754.064763 | -0.3843729 | 0.13843959 | -2.7764668 | 0.02384287 |
| Phosphohexose isomerase                                                                                                              | 1144.80799 | -0.3872882 | 0.11434229 | -3.3870948 | 0.00468228 |
| mannose-specific adhesion FimH                                                                                                       | 8981.21702 | -0.3908745 | 0.14983756 | -2.6086548 | 0.03574463 |
| DnaJ-like protein DjaA                                                                                                               | 508.761287 | -0.3923599 | 0.14538876 | -2.6986946 | 0.02885018 |
| Malonyl CoA-acyl carrier protein transacylase                                                                                        | 100135.788 | -0.3936235 | 0.13045031 | -3.0174209 | 0.01303867 |
| Putative 3-hydroxyacyl-coa dehydrogenase                                                                                             | 35263.207  | -0.3943816 | 0.15969332 | -2.4696188 | 0.04890396 |
| Superoxide dismutase [Fe]                                                                                                            | 1003.89989 | -0.3960929 | 0.14994765 | -2.6415412 | 0.03296828 |
| Ferric hydroxamate ABC transporter (TC 3.A.1.14.3)%2C permease component FhuB                                                        | 1994.63147 | -0.3960954 | 0.11899272 | -3.3287366 | 0.00555548 |
| Alanine transaminase                                                                                                                 | 2222.7736  | -0.3997793 | 0.1606035  | -2.4892315 | 0.04696122 |
| Hypothetical response regulatory protein ypdB                                                                                        | 929.566183 | -0.4002716 | 0.12959487 | -3.0886376 | 0.01077637 |
| Topoisomerase IV subunit B                                                                                                           | 2373.23924 | -0.4003911 | 0.09726079 | -4.1166751 | 0.00040249 |
| Rod shape-determining protein RodA                                                                                                   | 849.049179 | -0.4006775 | 0.13085797 | -3.0619264 | 0.01156736 |
| COG1272: Predicted membrane protein hemolysin III homolog                                                                            | 7051.30042 | -0.4007365 | 0.12493708 | -3.2075066 | 0.00781289 |
| Ferric enterobactin transport system permease protein fepD                                                                           | 1786.77911 | -0.4007924 | 0.14287427 | -2.8052104 | 0.02217767 |
| UPF0141 membrane protein YijF possibly required for phosphoethanolamine modification of lipopolysaccharide                           | 2137.15611 | -0.4012299 | 0.14871935 | -2.6978994 | 0.02866641 |
| Hydrolase%2C alpha/beta fold family functionally coupled to Phosphoribulokinase                                                      | 415.270284 | -0.4032717 | 0.14139922 | -2.8520077 | 0.01963862 |
| Probable sugar efflux transporter                                                                                                    | 1227.68775 | -0.4033131 | 0.14006342 | -2.8795038 | 0.01827833 |
| YehQ protein                                                                                                                         | 318.686561 | -0.4037377 | 0.13561332 | -2.9771242 | 0.01430341 |
| ATP synthase delta chain                                                                                                             | 5544.83326 | -0.4044741 | 0.12139491 | -3.3318871 | 0.0055205  |
| Type I restriction-modification system%2C DNA-methyltransferase subunit M                                                            | 767.116031 | -0.4054401 | 0.14553508 | -2.7858581 | 0.02331919 |
| Putative phosphatase                                                                                                                 | 212.091335 | -0.4058738 | 0.14690384 | -2.7628538 | 0.024742   |
| Similarity with glutathionylspermidine synthase                                                                                      | 260.556557 | -0.406741  | 0.13446722 | -3.0248335 | 0.01277376 |
| Hydrogenase-2 operon protein hylE                                                                                                    | 366.169071 | -0.4072135 | 0.1168934  | -3.4836311 | 0.00345577 |
| Outer membrane protein YfgL%2C lipoprotein component of the protein assembly complex (forms a complex with YaeT%2C YfiO%2C and NlpB) | 4136.41525 | -0.4072954 | 0.10813442 | -3.7665661 | 0.00139223 |
| hypothetical protein                                                                                                                 | 12726.1034 | -0.4077892 | 0.10991564 | -3.71002   | 0.00168742 |
| ToIA protein                                                                                                                         | 1474.78108 | -0.4092828 | 0.11607408 | -3.5260487 | 0.0030698  |
| Dihydroneopterin triphosphopyrophosphohydrolase type 2 (nudB)                                                                        | 995.7997   | -0.4095975 | 0.12629278 | -3.243238  | 0.00703956 |
| COG0613%2C Predicted metal-dependent phosphoesterases (PHP family)                                                                   | 582.563028 | -0.4100787 | 0.15725092 | -2.6077987 | 0.03577849 |
| DNA polymerase III delta subunit                                                                                                     | 878.748332 | -0.4104935 | 0.12899059 | -3.1603021 | 0.00895469 |
| Apolipoprotein N-acyltransferase                                                                                                     | 2055.91596 | -0.4135042 | 0.11189085 | -3.6956034 | 0.00176036 |
| 3-oxoacyl-[acyl carrier protein] synthase                                                                                            | 164.918045 | -0.4148123 | 0.15247314 | -2.72056   | 0.0273853  |
| Putative cytoplasmic protein                                                                                                         | 4255.31823 | -0.4151049 | 0.16080097 | -2.5930936 | 0.03698627 |
| Molybdenum transport ATP-binding protein ModC (TC 3.A.1.8.1)                                                                         | 3586.1961  | -0.4157076 | 0.13984379 | -2.9726571 | 0.01441139 |
| Methyl-accepting chemotaxis protein II (aspartate chemoreceptor protein)                                                             | 29396.2755 | -0.4162999 | 0.1356709  | -3.0684536 | 0.01136269 |
| FIG00639460: hypothetical protein                                                                                                    | 359.855596 | -0.4164634 | 0.13972056 | -2.9806882 | 0.01418917 |
| FIG00638276: hypothetical protein                                                                                                    | 277.6754   | -0.417977  | 0.14965638 | -2.7964806 | 0.02263168 |
| Cell division protein DivIC (FtsB)%2C stabilizes FtsL against RasP cleavage                                                          | 317.03434  | -0.4180968 | 0.15280028 | -2.7362304 | 0.02633427 |
| LSU ribosomal protein L17p                                                                                                           | 8056.39579 | -0.4199558 | 0.11684942 | -3.5939918 | 0.00247319 |
| Phospholipase A1 precursor                                                                                                           | 581.22611  | -0.4200017 | 0.13120763 | -3.2010465 | 0.00796968 |
| Dihydroterate synthase                                                                                                               | 806.966311 | -0.4216991 | 0.11740797 | -3.5917419 | 0.00248395 |
| Ribosomal large subunit pseudouridine synthase C                                                                                     | 268.233042 | -0.4229132 | 0.17035563 | -2.4825312 | 0.04769938 |
| Ribosomal large subunit pseudouridine synthase B                                                                                     | 1120.0686  | -0.4231648 | 0.12265589 | -3.4500164 | 0.003845   |
| YaaH protein                                                                                                                         | 375.521196 | -0.4239101 | 0.14868954 | -2.8509745 | 0.01966334 |
| SSU ribosomal protein S11p (S14e)                                                                                                    | 20266.9191 | -0.4252203 | 0.11477833 | -3.7047089 | 0.00171348 |
| Uridine kinase                                                                                                                       | 449.283873 | -0.4255326 | 0.16899208 | -2.5180621 | 0.04418029 |
| D-glycero-D-manno-heptose 1%2C7-bisphosphate phosphatase                                                                             | 1440.26285 | -0.428029  | 0.13302927 | -3.2175552 | 0.00757514 |
| [NiFe] hydrogenase metallocenter assembly protein HypD                                                                               | 343.314087 | -0.4280918 | 0.17162187 | -2.4943893 | 0.04641833 |
| Putative inner membrane protein                                                                                                      | 196.903281 | -0.4289131 | 0.1573872  | -2.7252095 | 0.02705274 |
| Nicotinate-nucleotide adenyllyltransferase                                                                                           | 676.220514 | -0.4292999 | 0.14658719 | -2.9286316 | 0.01618754 |
| tRNA-specific 2-thiouridylyase MmmA                                                                                                  | 1476.59262 | -0.431787  | 0.14580417 | -2.9614175 | 0.01483311 |
| Lipid A-disaccharide synthase                                                                                                        | 2286.72711 | -0.4331732 | 0.14974429 | -2.8927526 | 0.01766789 |
| putative TYPE II DNA MODIFICATION ENZYME (METHYLTRANSFERASE)                                                                         | 1507.05642 | -0.4339041 | 0.16344651 | -2.6547163 | 0.03193317 |
| Ribonuclease III                                                                                                                     | 1470.58572 | -0.4348039 | 0.12221899 | -3.5575803 | 0.00277502 |
| Ferrichrome transport ATP-binding protein FhuC (TC 3.A.1.14.3)                                                                       | 277.444223 | -0.4359112 | 0.16341387 | -2.6675287 | 0.03087782 |
| Putative efflux (PET) family inner membrane protein Ycc5                                                                             | 674.722981 | -0.4359477 | 0.10129699 | -4.3036591 | 0.00019861 |
| Hydrogenase-2 large chain precursor                                                                                                  | 1361.61788 | -0.4360521 | 0.11159645 | -3.907401  | 0.0008511  |
| Putative heat shock protein YegD                                                                                                     | 469.972639 | -0.4373164 | 0.12449734 | -3.5126564 | 0.00319288 |
| Nucleoside 5'-triphosphatase RdgB (dHAPT%2CdITP%2CXTp-specific)                                                                      | 422.615341 | -0.4381554 | 0.12614134 | -3.4735275 | 0.00356109 |
| FIG00638687: hypothetical protein                                                                                                    | 307.28466  | -0.4395677 | 0.17579645 | -2.5004354 | 0.04594777 |
| Vitamin B12 ABC transporter%2C B12-binding component BtuF                                                                            | 459.970678 | -0.4405705 | 0.16910738 | -2.6052706 | 0.03600597 |
| Chromosomal replication initiator protein DnaA                                                                                       | 4084.17936 | -0.4409597 | 0.11414855 | -3.8630338 | 0.00100346 |
| Uncharacterized HTH-type transcriptional regulator YegW                                                                              | 380.716534 | -0.4410182 | 0.14194554 | -3.1069536 | 0.01032358 |
| dTDP-glucose 4%2C6-dehydratase                                                                                                       | 1372.03878 | -0.4412796 | 0.13187172 | -3.3462794 | 0.00528819 |
| Endonuclease VIII                                                                                                                    | 863.660536 | -0.4417581 | 0.13420524 | -2.2916604 | 0.00616908 |
| Uracil phosphoribosyltransferase                                                                                                     | 458.004326 | -0.4422945 | 0.1788634  | -2.4728062 | 0.04854742 |
| Vitamin B12 ABC transporter%2C permease component BtuC                                                                               | 554.816702 | -0.443149  | 0.13487834 | -3.2855458 | 0.00627029 |
| FIG004798: Putative cytoplasmic protein                                                                                              | 410.346304 | -0.4451963 | 0.12025919 | -3.7019734 | 0.00172283 |
| Diaminopimelate epimerase                                                                                                            | 2567.83745 | -0.4452794 | 0.13419359 | -3.3181866 | 0.0057374  |
| Ribonucleotide reductase of class III (anaerobic)%2C activating protein                                                              | 363.747098 | -0.4457979 | 0.12469535 | -3.5750964 | 0.00263242 |
| RND efflux system%2C inner membrane transporter CmeB                                                                                 | 408.571266 | -0.4464405 | 0.1229968  | -3.6296918 | 0.00219926 |
| SSU rRNA (adenine(1518)-N(6)/adenine(1519)-N(6))-dimethyltransferase                                                                 | 2047.95125 | -0.4464644 | 0.11042648 | -4.0430917 | 0.00052565 |
| Putative sulfate permease                                                                                                            | 557.365636 | -0.44675   | 0.16044678 | -2.7844126 | 0.02340084 |
| ATP synthase A chain                                                                                                                 | 3011.55297 | -0.4485787 | 0.11256098 | -3.9852058 | 0.00064765 |
| Hydrogenase maturation protease                                                                                                      | 519.260871 | -0.4495743 | 0.13962434 | -3.2198853 | 0.0075611  |
| NADH ubiquinone oxidoreductase chain A                                                                                               | 1555.08101 | -0.4502829 | 0.13893184 | -3.2410344 | 0.00707661 |
| Lysyl-tRNA synthetase (class II)                                                                                                     | 5966.69267 | -0.4508126 | 0.10680495 | -4.2208964 | 0.00027107 |
| LSU ribosomal protein L21p                                                                                                           | 1394.96265 | -0.450934  | 0.17585882 | -2.564182  | 0.03967031 |
| Flagellar biosynthesis protein Flis                                                                                                  | 3802.9257  | -0.451132  | 0.12969826 | -3.4783196 | 0.00350868 |
| Fumarate reductase subunit C                                                                                                         | 430.714439 | -0.4515985 | 0.15332161 | -2.9454324 | 0.01549827 |
| PspA/IM30 family protein                                                                                                             | 150.93653  | -0.4551089 | 0.1830589  | -2.4861338 | 0.04729548 |
| Methyl-accepting chemotaxis protein I (serine chemoreceptor protein)                                                                 | 3714.31641 | -0.4554469 | 0.10204597 | -4.463154  | 0.00010462 |
| Leucyl/phenylalanyl-tRNA-protein transferase                                                                                         | 585.468572 | -0.455872  | 0.1154437  | -3.9488682 | 0.00073862 |
| Putative cytoplasmic protein                                                                                                         | 413.677847 | -0.4559921 | 0.13287272 | -3.4317964 | 0.00405153 |
| Protein of unknown function DUF484                                                                                                   | 1671.31847 | -0.4565862 | 0.15022571 | -3.0393345 | 0.01224394 |
| YbbM seven transmembrane helix protein                                                                                               | 419.180632 | -0.4566252 | 0.17015393 | -2.6836005 | 0.02977725 |
| Uridylate kinase                                                                                                                     | 1536.81814 | -0.4571935 | 0.10624041 | -4.303386  | 0.00019861 |
| LSU ribosomal protein L18p (L5e)                                                                                                     | 9004.4284  | -0.4579565 | 0.14925377 | -3.0683081 | 0.01136269 |
| 1%2C4-dihydroxy-2-naphthoate octaprenyltransferase                                                                                   | 323.160065 | -0.458248  | 0.15816519 | -2.8972746 | 0.01751201 |
| Putative transport protein                                                                                                           | 776.253435 | -0.458371  | 0.11735322 | -3.9059089 | 0.00085465 |
| Methyl-accepting chemotaxis protein IV (dipeptide chemoreceptor protein)                                                             | 553.025431 | -0.4590013 | 0.15859844 | -2.8941096 | 0.0176399  |
| Recombination protein RecR                                                                                                           | 1195.66453 | -0.4599073 | 0.11938862 | -3.852187  | 0.00103872 |
| Adenine phosphoribosyltransferase                                                                                                    | 828.578794 | -0.4599502 | 0.16110675 | -2.8549409 | 0.01947758 |
| hypothetical protein                                                                                                                 | 5799.38316 | -0.4608228 | 0.11674223 | -3.9473531 | 0.00074177 |
| 23S rRNA (guanine-N-2-)-methyltransferase rlmG                                                                                       | 360.988522 | -0.463621  | 0.15956878 | -2.9054618 | 0.01724762 |
| Cytochrome d ubiquinol oxidase subunit I                                                                                             | 28280.908  | -0.4640963 | 0.18606833 | -2.4942251 | 0.04641833 |
| SSU ribosomal protein S13p (S18e)                                                                                                    | 11408.743  | -0.4642153 | 0.1067431  | -4.3489026 | 0.00016903 |
| Guanosine 5'-triphosphate%2C3'-diphosphate pyrophosphatase                                                                           | 3962.42171 | -0.4646213 | 0.13006731 | -3.5721608 | 0.00264893 |
| Probable lipoprotein nlpC precursor                                                                                                  | 1467.74209 | -0.4648026 | 0.16871517 | -2.7549544 | 0.02525116 |
| 3-oxoacyl-[acyl-carrier-protein] synthase%2CKaSIll                                                                                   | 4179.59095 | -0.464852  | 0.11550271 | -4.0245985 | 0.00056499 |
| Cell division protein MraZ                                                                                                           | 1694.3965  | -0.4648724 | 0.14073803 | -3.3031046 | 0.00597169 |
| Membrane protein YciG%2C linked to IspA                                                                                              | 622.406768 | -0.4654952 | 0.14138642 | -3.2923615 | 0.00616214 |
| SSU ribosomal protein S4p (S9e)                                                                                                      | 19848.4206 | -0.4659248 | 0.10264251 | -4.5716618 | 6.75E-05   |
| HTH-type transcriptional regulator prsX                                                                                              | 301.890568 | -0.469942  | 0.14992355 | -3.1345445 | 0.0096108  |
| UDP-N-acetylglucosamine 2-epimerase                                                                                                  | 1657.99154 | -0.4715598 | 0.10442329 | -4.5158493 | 8.31E-05   |
| 3-hydroxydecanoyl-[acyl-carrier-protein] dehydratase                                                                                 | 1456.975   | -0.471824  | 0.13044954 | -3.6169081 | 0.00229504 |

|                                                                                                          |            |            |            |            |            |
|----------------------------------------------------------------------------------------------------------|------------|------------|------------|------------|------------|
| DNA mismatch repair endonuclease MthH                                                                    | 361.697096 | -0.4727367 | 0.1354411  | -3.4903485 | 0.00340679 |
| Heat shock protein 60 family co-chaperone GroES                                                          | 969.240892 | -0.4743537 | 0.15224373 | -3.1157517 | 0.01008344 |
| Ribose operon repressor                                                                                  | 629.248933 | -0.474354  | 0.13805424 | -3.4359969 | 0.00400085 |
| Mobile element protein                                                                                   | 156.149743 | -0.4752622 | 0.17660806 | -2.691056  | 0.02935816 |
| FIG0639031: hypothetical protein                                                                         | 3162.10769 | -0.4777307 | 0.08313782 | -5.74625   | 2.72E-07   |
| Undecaprenyl diphosphate synthase                                                                        | 1970.65321 | -0.479649  | 0.10728718 | -4.4707018 | 0.00010158 |
| FIG002708: Protein SirB1                                                                                 | 1055.62885 | -0.4809197 | 0.15694443 | -3.0642677 | 0.01149053 |
| Putative translocator ATPase                                                                             | 432.635908 | -0.4810618 | 0.14944489 | -3.2189911 | 0.00756505 |
| Biopolymer transport protein ExbD/ToIR                                                                   | 5631.01149 | -0.4816113 | 0.1155803  | -4.1668977 | 0.00033795 |
| Beta-lactamase                                                                                           | 5206.86529 | -0.4819089 | 0.13000914 | -3.7067309 | 0.0017029  |
| Glutamate racemase                                                                                       | 1131.62133 | -0.4823543 | 0.15548086 | -3.1023386 | 0.01040048 |
| Ferric hydroxamate ABC transporter (TC 3.A.1.14.3)%2C ATP-binding protein FluC                           | 1990.65658 | -0.4823589 | 0.12516819 | -3.8536857 | 0.0010344  |
| Phenylalanyl-tRNA synthetase alpha chain                                                                 | 1900.91679 | -0.4846682 | 0.14636207 | -3.3114332 | 0.00586133 |
| Mobile element protein                                                                                   | 547.912043 | -0.4848566 | 0.15683604 | -3.0914871 | 0.01068611 |
| 6%2C7-dimethyl-8-ribityllumazine synthase                                                                | 1962.59834 | -0.4855632 | 0.09209149 | -5.2726173 | 3.21E-06   |
| Transcription termination protein NusB                                                                   | 2905.59854 | -0.4869585 | 0.10105263 | -4.81886   | 2.48E-05   |
| Hemin ABC transporter%2C permease protein                                                                | 1838.94768 | -0.4877754 | 0.14014063 | -3.480614  | 0.00348955 |
| Pyridoxamine 5'-phosphate oxidase                                                                        | 995.643504 | -0.4882235 | 0.17857658 | -2.733973  | 0.02646603 |
| Channel-forming transporter/cytolysins activator of TpsB family                                          | 694.178143 | -0.4883224 | 0.15692987 | -3.1117237 | 0.01019731 |
| Putative transcriptional regulator                                                                       | 945.700155 | -0.4887564 | 0.17682167 | -2.7641203 | 0.02466967 |
| Putative exported protein                                                                                | 1130.01363 | -0.4890033 | 0.14316635 | -3.4156302 | 0.00427436 |
| Formate dehydrogenase O alpha subunit                                                                    | 1711.33501 | -0.4906526 | 0.15674338 | -3.1302923 | 0.00972707 |
| DNA polymerase III alpha subunit                                                                         | 4809.90492 | -0.4912938 | 0.11061892 | -4.4413179 | 0.00011517 |
| Chaperone protein HscB                                                                                   | 1119.73263 | -0.49141   | 0.16291493 | -3.0163595 | 0.0130476  |
| Acetylglutamate kinase                                                                                   | 1840.57883 | -0.4923377 | 0.13298124 | -3.7023093 | 0.00172283 |
| Protein YjgK%2C linked to biofilm formation                                                              | 266.696471 | -0.4932333 | 0.19027853 | -2.5921647 | 0.03705452 |
| Sensor protein torS                                                                                      | 314.160686 | -0.4948813 | 0.1537231  | -3.2193036 | 0.00756505 |
| Orotidine 5'-phosphate decarboxylase                                                                     | 357.87162  | -0.4962682 | 0.13011141 | -3.8141789 | 0.00117874 |
| Tetraacyldisaccharide 4'-kinase                                                                          | 1275.86159 | -0.4965055 | 0.11963559 | -4.159606  | 0.0003458  |
| Cytochrome c-type protein NapC                                                                           | 106.285985 | -0.4965846 | 0.19072026 | -2.6037326 | 0.03610547 |
| Protein-export membrane protein SecF (TC 3.A.5.1.1)                                                      | 3432.96216 | -0.4978607 | 0.13330848 | -3.7346514 | 0.0015581  |
| Chemotaxis response regulator protein-glutamate methyltransferase CheB                                   | 6258.90078 | -0.499649  | 0.10882887 | -4.5911439 | 6.31E-05   |
| Adenylosuccinate synthetase                                                                              | 19221.6383 | -0.4997691 | 0.13438084 | -3.7190505 | 0.00164551 |
| GTP-binding protein TypA/BipA                                                                            | 12716.5113 | -0.4998341 | 0.10546113 | -4.7395098 | 3.44E-05   |
| Potassium efflux system KefA protein / Small-conductance mechanosensitive channel                        | 2118.29753 | -0.5003827 | 0.09899556 | -5.0545978 | 8.85E-06   |
| tRNA S(4)U 4-thiouridine synthase (former Thiil) / Rhodanese-like domain required for thiamine synthesis | 694.427601 | -0.50107   | 0.16174797 | -3.0978444 | 0.01053432 |
| Outer membrane vitamin B12 receptor BtuB                                                                 | 2791.90452 | -0.5012433 | 0.11736544 | -4.2707914 | 0.00022587 |
| NADH-ubiquinone oxidoreductase chain B                                                                   | 2683.91032 | -0.5021179 | 0.12540659 | -4.0039196 | 0.00060747 |
| Nitrate/nitrite sensor protein                                                                           | 558.149483 | -0.5028273 | 0.1188766  | -4.2298261 | 0.00026195 |
| FIG01046632: hypothetical protein                                                                        | 182.685045 | -0.5039169 | 0.18833101 | -2.6756978 | 0.03027018 |
| SSU ribosomal protein S15p (S13e)                                                                        | 2419.33737 | -0.5042601 | 0.12848905 | -3.9245378 | 0.00080057 |
| DNA polymerase I                                                                                         | 151.24013  | -0.5068701 | 0.2011683  | -2.519632  | 0.04402011 |
| Transcription termination protein NusA                                                                   | 10468.444  | -0.5077132 | 0.11767734 | -4.3144517 | 0.0001904  |
| Succinate dehydrogenase iron-sulfur protein                                                              | 1018.95186 | -0.50803   | 0.18498317 | -2.7463579 | 0.02572724 |
| Selenophosphate-dependent tRNA 2-selenouridine synthase                                                  | 190.476827 | -0.5092666 | 0.19296324 | -2.6391899 | 0.03313944 |
| UPF0125 protein yJfF                                                                                     | 339.318558 | -0.5102458 | 0.15043406 | -3.3918234 | 0.00460896 |
| DcrB protein precursor                                                                                   | 2233.75397 | -0.5112556 | 0.12810392 | -3.9909446 | 0.00063486 |
| Peptide chain release factor 2%3B programmed frameshift-containing                                       | 2810.13894 | -0.5125746 | 0.15647166 | -3.2758305 | 0.00642023 |
| Twin-arginine translocation protein TatC                                                                 | 1280.1823  | -0.5126379 | 0.13753731 | -3.7227729 | 0.00160489 |
| FIG00637874: hypothetical protein                                                                        | 233.505893 | -0.5126396 | 0.2001654  | -2.5610801 | 0.03995693 |
| N-acetyl-gamma-glutamyl-phosphate reductase                                                              | 2087.14565 | -0.5142657 | 0.13952828 | -3.6857454 | 0.00181706 |
| SSU ribosomal protein S9p (S16e)                                                                         | 11014.3927 | -0.5153609 | 0.12720088 | -4.0515512 | 0.00050924 |
| Ferrous iron transport protein B                                                                         | 20662.0601 | -0.5165664 | 0.14808874 | -3.4882217 | 0.00342024 |
| Membrane-bound lytic murein transglycosylase A precursor                                                 | 735.1036   | -0.5168196 | 0.12637644 | -4.089525  | 0.00044441 |
| Ribosomal RNA large subunit methyltransferase F                                                          | 346.705877 | -0.5177215 | 0.16833723 | -3.0755021 | 0.01115706 |
| Spermidine Putrescine ABC transporter permease component PotB (TC 3.A.1.11.1)                            | 511.701549 | -0.5180375 | 0.17847706 | -2.9025438 | 0.01733718 |
| Acetylornithine aminotransferase                                                                         | 760.159676 | -0.5190834 | 0.13301404 | -3.9024708 | 0.00086169 |
| Transglycosylase%2C Slt family                                                                           | 135.144978 | -0.5196679 | 0.19819823 | -2.6219603 | 0.03452855 |
| NotA/ToIQ/ExbB proton channel family protein                                                             | 7973.28486 | -0.51997   | 0.17942197 | -2.8980288 | 0.0175024  |
| Inner membrane protein                                                                                   | 582.159296 | -0.5206613 | 0.15946289 | -3.265094  | 0.00663296 |
| Uridine kinase family protein YggC homolog                                                               | 345.736817 | -0.5209683 | 0.16590914 | -3.140082  | 0.00950118 |
| FIG01219785: hypothetical protein                                                                        | 269.104079 | -0.5216467 | 0.15665095 | -3.3299938 | 0.00554604 |
| S-adenosylmethionine:tRNA ribosyltransferase-isomerase                                                   | 382.790245 | -0.5231144 | 0.18098401 | -2.8903898 | 0.01776499 |
| Malonyl CoA-acyl carrier protein transacylase                                                            | 34460.3559 | -0.5242059 | 0.15526851 | -3.3761247 | 0.00484447 |
| Transcriptional regulator%2C ArsR family                                                                 | 352.94627  | -0.5246724 | 0.19524186 | -2.6872948 | 0.02950264 |
| tRNA dihydrouridine synthase A                                                                           | 338.941955 | -0.5254654 | 0.13657842 | -3.8473532 | 0.00105529 |
| Biotin carboxylase of acetyl-CoA carboxylase                                                             | 3873.51692 | -0.5277994 | 0.11348645 | -4.6507704 | 4.98E-05   |
| Rod shape-determining protein MreC                                                                       | 1012.4145  | -0.5279664 | 0.17733653 | -2.9772003 | 0.01430341 |
| Transyrosine component STY3231 of energizing module of quaeosine-regulated ECF transporter               | 97.684255  | -0.5281452 | 0.20827401 | -2.5358189 | 0.04239793 |
| Thymine recombinase XerC                                                                                 | 2146.35478 | -0.5285944 | 0.19582519 | -2.6993175 | 0.02883683 |
| Butyryl-CoA dehydrogenase                                                                                | 36441.9106 | -0.5287443 | 0.16429304 | -3.2182999 | 0.00757348 |
| C4-dicarboxylate transporter DcuC (TC 2.A.61.1.1)                                                        | 151.677654 | -0.5293828 | 0.18870759 | -2.8053072 | 0.02217767 |
| LSU ribosomal protein L6p (L9e)                                                                          | 15017.5692 | -0.5313982 | 0.14429804 | -3.682643  | 0.0018361  |
| Putative HTH-type transcriptional regulator ypdC                                                         | 406.659181 | -0.5319167 | 0.14091367 | -3.7747698 | 0.00135728 |
| CDP-diacylglycerol-3-phosphate 3-phosphatidyltransferase                                                 | 2385.76425 | -0.5321028 | 0.16237902 | -3.2769188 | 0.00640651 |
| Putative TonB dependent outer membrane receptor                                                          | 989.055104 | -0.5322383 | 0.14539519 | -3.6606318 | 0.00198043 |
| Putative metalloprotease yggG                                                                            | 144.108077 | -0.5351779 | 0.18321578 | -2.9210253 | 0.01654632 |
| FIG00638699: hypothetical protein                                                                        | 201.743801 | -0.535244  | 0.1617846  | -3.3083743 | 0.00590078 |
| FIG00639050: hypothetical protein                                                                        | 571.063377 | -0.5356045 | 0.18446018 | -2.903632  | 0.01729491 |
| 2-haloalkanoic acid dehalogenase                                                                         | 1093.7659  | -0.5358225 | 0.15558201 | -3.4439875 | 0.00390812 |
| CFA/I fimbrial subunit C usher protein                                                                   | 1107.0402  | -0.5364447 | 0.19835695 | -2.7044411 | 0.02848609 |
| Electron transport complex protein RnfG                                                                  | 395.807552 | -0.5367518 | 0.19542051 | -2.7466502 | 0.02572724 |
| Transcriptional regulatory protein CItB%2C DpIA                                                          | 291.767715 | -0.5372467 | 0.18600715 | -2.8883124 | 0.01786456 |
| hypothetical protein                                                                                     | 801.873444 | -0.5373461 | 0.15903861 | -3.3787147 | 0.00480627 |
| Phosphate acetyltransferase                                                                              | 658.46961  | -0.5383344 | 0.12940634 | -4.1600309 | 0.0003458  |
| Septum formation protein Maf                                                                             | 1045.66316 | -0.5392276 | 0.12307374 | -4.3813371 | 0.00014939 |
| regulator of length of O-antigen component of lipopolysaccharide chains                                  | 2406.58608 | -0.5450381 | 0.18790458 | -2.9006109 | 0.01742647 |
| Phosphogluconate repressor HexR%2C RpiR family                                                           | 466.925624 | -0.5456673 | 0.17574916 | -3.1048072 | 0.01032641 |
| ABC-type hemin transport system%2C ATPase component                                                      | 1198.03772 | -0.5497861 | 0.14020733 | -3.9212365 | 0.00081516 |
| Protein AtZg37660%2C chloroplast precursor                                                               | 135.856251 | -0.5499352 | 0.17892893 | -3.0734839 | 0.01121822 |
| 16S rRNA (cytosine(967)-C(5))-methyltransferase                                                          | 1150.43471 | -0.5513534 | 0.1417573  | -3.8894184 | 0.00090576 |
| Pantothenate:Na+ symporter (TC 2.A.21.1.1)                                                               | 419.347513 | -0.5524205 | 0.143522   | -3.8493034 | 0.00105014 |
| Oligopeptide transport system permease protein OppC (TC 3.A.1.5.1)                                       | 1950.87834 | -0.5528346 | 0.14994792 | -3.6868445 | 0.00181242 |
| FIG00642550: hypothetical protein                                                                        | 377.727543 | -0.5541761 | 0.16430596 | -3.3728303 | 0.00488882 |
| Transporter%2C putative                                                                                  | 997.065378 | -0.5553204 | 0.14500126 | -3.8297624 | 0.00111624 |
| Fructose repressor FruR%2C LacI family                                                                   | 1546.25357 | -0.5555112 | 0.14695216 | -3.7802183 | 0.00133541 |
| Proposed lipolate regulatory protein YbeD                                                                | 542.850581 | -0.5556769 | 0.17075694 | -3.2541981 | 0.00684469 |
| Pyruvate formate-lyase                                                                                   | 158521.716 | -0.5564265 | 0.20996308 | -2.6501161 | 0.03229127 |
| TonB-dependent receptor%3B Outer membrane receptor for ferric enterobactin and colicins B%2C D           | 26153.7044 | -0.556752  | 0.1484766  | -3.7497629 | 0.00148068 |
| Cytochrome c51 peroxidase                                                                                | 92.3215826 | -0.5577706 | 0.21226142 | -2.6277531 | 0.0340946  |
| 2-keto-3-deoxy-D-arabino-heptulosonate-7-phosphate synthase I alpha                                      | 2469.18362 | -0.5593376 | 0.1965726  | -2.8454503 | 0.01994811 |
| Endonuclease III                                                                                         | 274.156569 | -0.5604811 | 0.16171569 | -3.4658425 | 0.00364217 |
| Flagellar biosynthesis protein Flit                                                                      | 1685.66561 | -0.5633984 | 0.18713021 | -3.0107293 | 0.01323243 |
| Cytochrome O ubiquinol oxidase subunit I                                                                 | 18674.4641 | -0.5651159 | 0.1737092  | -3.2532297 | 0.00684671 |
| putative inner membrane protein                                                                          | 1539.26018 | -0.5659602 | 0.1974052  | -2.8669975 | 0.01888269 |
| Periplasmic thiol:disulfide oxidoreductase DsbB%2C required for DsbA reoxidation                         | 452.472166 | -0.5663934 | 0.17718153 | -3.1966843 | 0.00808081 |
| Electron transport complex protein RnfD                                                                  | 443.335308 | -0.5667036 | 0.17440761 | -3.2493054 | 0.00691075 |
| Iron(III) citrate transport system%2C periplasmic iron-binding protein FecB (TC 3.A.1.14.1)              | 2087.56051 | -0.5698713 | 0.11764534 | -4.8439764 | 2.23E-05   |
| Methyl-accepting chemotaxis protein                                                                      | 11274.8531 | -0.5706603 | 0.20884351 | -2.732478  | 0.02653693 |

|                                                                                                                                             |            |            |            |            |            |
|---------------------------------------------------------------------------------------------------------------------------------------------|------------|------------|------------|------------|------------|
| Flagellar hook-associated protein FlgL                                                                                                      | 13966.17   | -0.5709941 | 0.13365441 | -4.2721682 | 0.00022505 |
| Transcriptional regulator for fatty acid degradation FadR%2C GntR family                                                                    | 953.20265  | -0.5734443 | 0.1193018  | -4.8066694 | 2.61E-05   |
| Xylanase                                                                                                                                    | 547.531655 | -0.5751289 | 0.13234024 | -4.3458354 | 0.00017048 |
| Putative two-component system response regulator YedW                                                                                       | 184.390784 | -0.5753404 | 0.20893798 | -2.7536421 | 0.02528066 |
| Hemin uptake protein HemP                                                                                                                   | 330.917688 | -0.5759298 | 0.17550039 | -3.2816439 | 0.00631479 |
| Rhodanese-related sulfurtransferases                                                                                                        | 1943.60315 | -0.5809144 | 0.19471232 | -2.9834495 | 0.01412324 |
| Protein yihD                                                                                                                                | 822.307619 | -0.5810055 | 0.20509583 | -2.832849  | 0.0206965  |
| DnaA regulatory inactivator Hda (Homologous to DnaA)                                                                                        | 1189.77062 | -0.5821046 | 0.12830507 | -4.536879  | 7.68E-05   |
| Flagellar hook-basal body complex protein FlIE                                                                                              | 77.3849327 | -0.5823976 | 0.23655862 | -2.461959  | 0.04963642 |
| Electron transport complex protein RnfC                                                                                                     | 1394.13816 | -0.5857621 | 0.13769046 | -4.254195  | 0.00023901 |
| lipid A biosynthesis lauroyl acyltransferase                                                                                                | 3388.67392 | -0.5880925 | 0.12238461 | -4.8052815 | 2.61E-05   |
| Chemotaxis protein methyltransferase CheR                                                                                                   | 7460.05849 | -0.5882758 | 0.14945893 | -3.9360364 | 0.00077441 |
| Putative amidase                                                                                                                            | 11082.2711 | -0.5907957 | 0.15656695 | -3.7734385 | 0.00135946 |
| MotA/TolQ/ExbB proton channel family protein                                                                                                | 931.011323 | -0.593401  | 0.19183783 | -3.0932432 | 0.0106603  |
| rRNA small subunit 7-methylguanosine (m7G) methyltransferase GidB                                                                           | 265.709324 | -0.5983906 | 0.18061715 | -3.313033  | 0.00583603 |
| Putative thiosulfate sulfurtransferase ynjE                                                                                                 | 112.202213 | -0.5987801 | 0.19339416 | -3.0961645 | 0.01058158 |
| tRNA (guanosine(18)-2'-O)-methyltransferase                                                                                                 | 570.259342 | -0.5992025 | 0.13001865 | -4.6085887 | 5.91E-05   |
| LSU ribosomal protein L13p (L13Ae)                                                                                                          | 7106.46879 | -0.5992031 | 0.129383   | -4.6312354 | 5.39E-05   |
| Nicotinamide-nucleotide adenyltransferase%2C NadR family                                                                                    | 121.627822 | -0.5998813 | 0.17442936 | -3.4391072 | 0.00396733 |
| NADH dehydrogenase                                                                                                                          | 8056.77471 | -0.6001208 | 0.12755997 | -4.7046174 | 3.98E-05   |
| Putative membrane protein YfcA                                                                                                              | 521.263424 | -0.6006975 | 0.14101843 | -4.2616236 | 0.00023354 |
| Radical SAM family enzyme%2C similar to coproporphyrinogen III oxidase%2Coxigen-independent%2Cclustered with nucleoside-triphosphatase RdgB | 578.909509 | -0.6023417 | 0.13165336 | -4.5752095 | 6.68E-05   |
| Ribose-phosphate pyrophosphokinase                                                                                                          | 4169.78225 | -0.6067156 | 0.09820109 | -6.1782982 | 2.44E-08   |
| Capsular polysaccharide export system protein Kps5                                                                                          | 406.806889 | -0.6080348 | 0.21179742 | -2.8708317 | 0.01869275 |
| Flagellar motor rotation protein MotA                                                                                                       | 6588.39991 | -0.6080978 | 0.15829481 | -3.8415523 | 0.00107845 |
| Pyridoxal kinase                                                                                                                            | 716.701991 | -0.6087251 | 0.13116552 | -4.6408931 | 5.19E-05   |
| Predicted N-ribosylNicotinamide CRP-like regulator                                                                                          | 125.389248 | -0.6115316 | 0.22756389 | -2.6872965 | 0.02950264 |
| Protein-export membrane protein SecD (TC 3.A.5.1.1)                                                                                         | 5136.19535 | -0.6138082 | 0.12001747 | -5.1143235 | 6.85E-06   |
| 16S rRNA processing protein RimM                                                                                                            | 10176.7337 | -0.6147445 | 0.12204913 | -5.0368611 | 9.58E-06   |
| LSU ribosomal protein L28p                                                                                                                  | 3203.98423 | -0.6155653 | 0.13280531 | -4.6350955 | 5.32E-05   |
| Antiholin-like protein LrgA                                                                                                                 | 25.1011027 | -0.6160694 | 0.15644635 | -3.9378955 | 0.00077002 |
| Putative Diguanylate cyclase/phosphodiesterase domain 1                                                                                     | 3210.01731 | -0.6168721 | 0.1155086  | -5.3404862 | 2.27E-06   |
| Dipeptide transport system permease protein DppB (TC 3.A.1.5.2)                                                                             | 628.318738 | -0.6169999 | 0.18239864 | -3.827002  | 0.00474397 |
| Carbamoyl-phosphate synthase small chain                                                                                                    | 815.036749 | -0.6172297 | 0.20007295 | -3.0850232 | 0.01085687 |
| FIG00638676: hypothetical protein                                                                                                           | 481.750213 | -0.6180887 | 0.22789458 | -2.7121694 | 0.02790724 |
| Formate dehydrogenase H                                                                                                                     | 261.468475 | -0.6201919 | 0.23837854 | -2.6017103 | 0.03628772 |
| Cell division trigger factor                                                                                                                | 7752.5804  | -0.620767  | 0.12470118 | -4.9780362 | 1.24E-05   |
| RNA polymerase sigma factor FecI                                                                                                            | 4674.12895 | -0.6216035 | 0.14993981 | -4.1456867 | 0.00036401 |
| Putative membrane protein                                                                                                                   | 4674.94521 | -0.6230556 | 0.15668194 | -3.9765632 | 0.00066738 |
| Penicillin-binding protein 2 (PBP-2)                                                                                                        | 246.982285 | -0.6241304 | 0.13768055 | -4.5331779 | 7.75E-05   |
| LSU ribosomal protein L34p                                                                                                                  | 935.818573 | -0.6264196 | 0.15525786 | -4.034705  | 0.00054359 |
| 2-amino-4-hydroxy-6-hydroxymethylidihydropteridine pyrophosphokinase                                                                        | 274.702499 | -0.6291344 | 0.19078555 | -3.2975996 | 0.00605662 |
| GTP-binding protein Obg                                                                                                                     | 207.724558 | -0.6293355 | 0.20179195 | -3.1187343 | 0.00999404 |
| Ribose ABC transport system%2C high affinity permease RbsD (TC 3.A.1.2.1)                                                                   | 2231.98927 | -0.6298523 | 0.14589056 | -4.3172928 | 0.00018874 |
| FIG00638308: hypothetical protein                                                                                                           | 1357.5779  | -0.631597  | 0.24951978 | -2.5312503 | 0.04287184 |
| Arginine ABC transporter%2C periplasmic arginine-binding protein AtJ                                                                        | 1904.10203 | -0.632356  | 0.1533404  | -4.1238705 | 0.00039283 |
| FIG00638396: hypothetical protein                                                                                                           | 925.792316 | -0.6348849 | 0.19010209 | -3.3397051 | 0.00538604 |
| Protein YkiA                                                                                                                                | 1887.57128 | -0.6351438 | 0.17686501 | -3.5911219 | 0.00248395 |
| Ornithine carbamoyltransferase                                                                                                              | 171.512217 | -0.6372198 | 0.19718561 | -3.2315736 | 0.00727749 |
| Deoxyribonuclease TatD                                                                                                                      | 1797.07289 | -0.6381385 | 0.14668935 | -4.34494   | 0.00017072 |
| ATP-dependent DNA helicase RecG                                                                                                             | 501.713515 | -0.6390546 | 0.17331801 | -3.6871792 | 0.00181242 |
| tRNA (Guanine37-N1)-methyltransferase                                                                                                       | 1406.12534 | -0.641655  | 0.12679827 | -5.0604397 | 8.66E-06   |
| FIG00613574: hypothetical protein                                                                                                           | 10920.569  | -0.6438212 | 0.12474361 | -5.161156  | 5.45E-06   |
| Transcription elongation factor GreA                                                                                                        | 2227.58254 | -0.6440949 | 0.11832777 | -5.4433114 | 1.35E-06   |
| Holliday junction resolvase / Crossover junction endodeoxyribonuclease rusa                                                                 | 504.84441  | -0.6457996 | 0.19022694 | -3.3948906 | 0.00457102 |
| Signal peptidase I                                                                                                                          | 87.7136731 | -0.6471992 | 0.2313676  | -2.7972768 | 0.02261968 |
| Probable acyltransferase yihG                                                                                                               | 2060.32481 | -0.6490217 | 0.13098064 | -4.9550964 | 1.38E-05   |
| iron acquisition yersiniabactin synthesis enzyme (Irp2)                                                                                     | 58.7316048 | -0.6501904 | 0.25790659 | -2.5210308 | 0.04393608 |
| Methionine repressor MetJ                                                                                                                   | 40439.8936 | -0.6505885 | 0.16402667 | -3.9663578 | 0.00069079 |
| Transposase ECs0136                                                                                                                         | 730.40687  | -0.6516779 | 0.15979903 | -4.0781093 | 0.00046053 |
| Ferrichrome-iron receptor                                                                                                                   | 102.820277 | -0.6519462 | 0.20854341 | -3.1261896 | 0.00980359 |
| Iron(III) dicitrate transmembrane sensor protein FecR                                                                                       | 752.47826  | -0.656616  | 0.24313116 | -2.7006659 | 0.02875862 |
| Ribonuclease HII                                                                                                                            | 10308.2193 | -0.6587652 | 0.12947976 | -5.0877847 | 7.68E-06   |
| Aracil permease                                                                                                                             | 753.84824  | -0.6590683 | 0.11091867 | -5.9419057 | 9.19E-08   |
| AmpG permease                                                                                                                               | 157.3716   | -0.6592649 | 0.20119082 | -3.2768143 | 0.00640651 |
| Membrane-bound lytic murein transglycosylase D precursor                                                                                    | 300.213715 | -0.6601814 | 0.21844133 | -3.0222368 | 0.01286929 |
| Inosine-guanosine kinase                                                                                                                    | 2364.25065 | -0.6626053 | 0.14802395 | -4.4763381 | 9.92E-05   |
| Flagellar biosynthesis protein FlhA                                                                                                         | 945.745678 | -0.6639907 | 0.17017508 | -3.9018091 | 0.00086233 |
| tRNA-guanine transglycosylase                                                                                                               | 925.576248 | -0.6643163 | 0.13689354 | -4.8527949 | 2.17E-05   |
| YjcB protein                                                                                                                                | 1108.73629 | -0.6657512 | 0.13309527 | -5.0020651 | 1.12E-05   |
| FxA protein                                                                                                                                 | 770.081553 | -0.6676545 | 0.22098348 | -3.0212868 | 0.01289515 |
| Type I restriction-modification system%2Cspecificity subunit S                                                                              | 367.575725 | -0.6720807 | 0.19362    | -3.4711324 | 0.00358753 |
| Iron(III) dicitrate transport protein FecA                                                                                                  | 361.448884 | -0.6729412 | 0.1410373  | -4.7713706 | 3.04E-05   |
| Putative S-transferase                                                                                                                      | 6196.17479 | -0.6790644 | 0.10734977 | -6.3257176 | 1.06E-08   |
| Spermidine Putrescine ABC transporter permease component potC (TC_3.A.1.11.1)                                                               | 106.129579 | -0.6791765 | 0.2067679  | -3.284729  | 0.00627427 |
| tRNA-Cm32/Urn32 methyltransferase                                                                                                           | 378.604011 | -0.6818442 | 0.20024129 | -3.405113  | 0.00442277 |
| Ferric hydroxamate ABC transporter (TC 3.A.1.14.3)%2C periplasmic substrate binding protein FhuD                                            | 1750.013   | -0.6842178 | 0.12900928 | -5.3036322 | 2.75E-06   |
| tRNA(Cytosine32)-2-thiocytidine synthetase                                                                                                  | 1481.15143 | -0.6848927 | 0.11286336 | -6.0683349 | 4.61E-08   |
| Rod shape-determining protein MreD                                                                                                          | 325.403142 | -0.6875602 | 0.15278388 | -4.500214  | 8.92E-05   |
| FIG003671: Metal-dependent hydrolase                                                                                                        | 400.157075 | -0.6878692 | 0.13690338 | -5.0244866 | 1.01E-05   |
| MFS superfamily export protein YceL                                                                                                         | 50.8489424 | -0.6897048 | 0.26726515 | -2.5806014 | 0.0381273  |
| Putative F1C and S fibrillar switch Regulatory protein                                                                                      | 1185.63428 | -0.6899476 | 0.21272762 | -3.243338  | 0.00703956 |
| Ferrous iron-sensing transcriptional regulator FecC                                                                                         | 695.691731 | -0.6904829 | 0.21036623 | -3.2822896 | 0.00630913 |
| LSU ribosomal protein L9p                                                                                                                   | 2347.48794 | -0.6906907 | 0.17256903 | -4.0024024 | 0.00061007 |
| FIG00643651: hypothetical protein                                                                                                           | 7309.13822 | -0.6914604 | 0.14091008 | -4.9071041 | 1.72E-05   |
| FIG004454: RNA binding protein                                                                                                              | 500.186742 | -0.6927138 | 0.19478013 | -3.5563882 | 0.00278096 |
| SSU ribosomal protein S16p                                                                                                                  | 319.887521 | -0.6942754 | 0.21675179 | -3.2030895 | 0.00792353 |
| LSU ribosomal protein L7/L12 (P1/P2)                                                                                                        | 1583.63638 | -0.6942937 | 0.13795336 | -5.0328145 | 9.74E-06   |
| Dj/tripeptide permease YbgH                                                                                                                 | 7189.81315 | -0.6950179 | 0.1399871  | -4.964871  | 1.32E-05   |
| FIG00638928: hypothetical protein                                                                                                           | 1120.99953 | -0.6966691 | 0.17945618 | -3.8821129 | 0.00092972 |
| FIG00639097: hypothetical protein                                                                                                           | 298.630858 | -0.6981196 | 0.17781314 | -3.9261417 | 0.00080199 |
| LSU ribosomal protein L22p (L17e)                                                                                                           | 40.8008187 | -0.7028861 | 0.28170185 | -2.495142  | 0.04637377 |
| Crotonobetainyl-CoA dehydrogenase                                                                                                           | 5798.05079 | -0.7104902 | 0.18509382 | -3.8385409 | 0.0108964  |
| Multidrug resistance protein D                                                                                                              | 204.188998 | -0.7160645 | 0.19623815 | -3.6489566 | 0.00205784 |
| Transcriptional repressor for pyruvate dehydrogenase complex                                                                                | 229.409142 | -0.7203779 | 0.18323672 | -3.9314058 | 0.00078786 |
| Iron(III) dicitrate transport system permease protein FecD (TC 3.A.1.14.1)                                                                  | 2420.05459 | -0.7246215 | 0.15956963 | -4.5410991 | 7.55E-05   |
| Dethiobiotin synthetase                                                                                                                     | 311.066747 | -0.7249015 | 0.15224849 | -4.7613054 | 3.15E-05   |
| ID=gene:EBG00000313244                                                                                                                      | 602.869413 | -0.725663  | 0.21626374 | -3.3554537 | 0.0051395  |
| Ribosomal protein S12p Asp88 (E. coli) methylthiotransferase                                                                                | 70.8350168 | -0.725848  | 0.29316561 | -2.4758975 | 0.04828337 |
| SSU ribosomal protein S7p (S5e)                                                                                                             | 575.182883 | -0.7296295 | 0.17737234 | -4.1135472 | 0.00040704 |
| Lipoprotein nlp precursor                                                                                                                   | 6659.0418  | -0.7299363 | 0.12279407 | -5.9443931 | 9.18E-08   |
| FIG00638745: hypothetical protein                                                                                                           | 28890.9861 | -0.730719  | 0.13122613 | -5.5683953 | 7.04E-07   |
| DNA recombination and repair protein RecF                                                                                                   | 97.3492211 | -0.7326361 | 0.2038304  | -3.5943417 | 0.00247319 |
| Putative polyketide synthase                                                                                                                | 480.588226 | -0.7327044 | 0.18232141 | -4.0187512 | 0.00057543 |
| Putative membrane protein                                                                                                                   | 12346.8957 | -0.7382148 | 0.15840418 | -4.6603244 | 4.77E-05   |
| hypothetical protein                                                                                                                        | 74.2474815 | -0.7419864 | 0.25426984 | -2.9181063 | 0.01684546 |
| Cold shock protein CspE                                                                                                                     | 103.3483   | -0.7451306 | 0.28418767 | -2.6219666 | 0.03452855 |
| Alcohol dehydrogenase                                                                                                                       | 20839.2492 | -0.7534916 | 0.26730482 | -2.8188477 | 0.02144479 |
|                                                                                                                                             | 339377.314 | -0.7568211 | 0.20727592 | -3.6512736 | 0.00204338 |

|                                                                                           |            |            |            |            |            |
|-------------------------------------------------------------------------------------------|------------|------------|------------|------------|------------|
| Serine transporter                                                                        | 165.408819 | -0.7595483 | 0.212594   | -3.5727645 | 0.0026487  |
| Adenylate kinase                                                                          | 1506.15856 | -0.761586  | 0.17335946 | -4.3931032 | 0.00014192 |
| Putative vimentin                                                                         | 8629.64874 | -0.7630312 | 0.16896854 | -4.5158179 | 8.31E-05   |
| Mg-chelatase subunit ChD                                                                  | 52.4019351 | -0.7631503 | 0.28381633 | -2.688888  | 0.02946959 |
| LSU ribosomal protein L33p @ LSU ribosomal protein L33p%2C zinc-independent               | 2289.36561 | -0.7668672 | 0.13922867 | -5.5079692 | 9.51E-07   |
| Formate efflux transporter (TC 2.A.44 family)                                             | 6793.22688 | -0.7686879 | 0.17754028 | -4.3296533 | 0.00018009 |
| Cold shock protein CspG                                                                   | 668.951754 | -0.7731291 | 0.27010067 | -2.8623738 | 0.01941116 |
| chaperone FimC                                                                            | 4003.03114 | -0.7770408 | 0.18726205 | -4.1494834 | 0.00036058 |
| FIG00638753: hypothetical protein                                                         | 186.163003 | -0.7791891 | 0.18701356 | -4.1664849 | 0.00033795 |
| Flagellar biosynthesis protein FlIZ                                                       | 2627.83053 | -0.7812604 | 0.22084508 | -3.5375947 | 0.00294812 |
| FIG00637977: hypothetical protein                                                         | 54.1013557 | -0.7813842 | 0.25996537 | -3.0057242 | 0.01337692 |
| hypothetical protein                                                                      | 1490.33042 | -0.7820024 | 0.21082236 | -3.7092955 | 0.00168877 |
| Ni/Fe-hydrogenase 2 B-type cytochrome subunit                                             | 162.139041 | -0.7835281 | 0.19696674 | -3.9779718 | 0.00066625 |
| Xanthine-guanine phosphoribosyltransferase                                                | 420.373316 | -0.784724  | 0.21100015 | -3.7190683 | 0.00164551 |
| Multimodular transpeptidase-transglycosylase                                              | 1102.0615  | -0.7851494 | 0.15381523 | -5.1044971 | 7.16E-06   |
| Iron(III) dicitrate transport ATP-binding protein FecE (TC 3.A.1.14.1)                    | 506.579689 | -0.7869178 | 0.14164736 | -5.5554712 | 7.47E-07   |
| Succinate dehydrogenase flavoprotein subunit                                              | 3438.81666 | -0.7870019 | 0.16160631 | -4.8698713 | 2.03E-05   |
| Putative inner membrane protein                                                           | 9765.06262 | -0.7886912 | 0.15726943 | -5.0149047 | 1.06E-05   |
| Inner membrane protein YccF                                                               | 87.8181866 | -0.7931317 | 0.27603955 | -2.8732538 | 0.01860624 |
| FIG00637875: hypothetical protein                                                         | 1036.30947 | -0.7951098 | 0.13953417 | -5.698316  | 3.47E-07   |
| LSU ribosomal protein L1p (L10Ae)                                                         | 13816.5504 | -0.7953975 | 0.14895736 | -5.3397662 | 2.27E-06   |
| tRNA dihydrouridine synthase B                                                            | 2403.73298 | -0.7968735 | 0.17168847 | -4.6413921 | 5.19E-05   |
| Mobile element protein                                                                    | 260.278214 | -0.7989789 | 0.26869378 | -2.9735667 | 0.01439731 |
| SSU ribosomal protein S6p                                                                 | 5694.04185 | -0.8038775 | 0.14465511 | -5.5572008 | 7.44E-07   |
| LSU ribosomal protein L19p                                                                | 2715.93582 | -0.8134661 | 0.17191662 | -4.7317475 | 3.55E-05   |
| Phosphate:acyl-ACP acyltransferase PlsX                                                   | 2135.21453 | -0.8171172 | 0.12198816 | -6.6983323 | 1.05E-09   |
| SSU ribosomal protein S12p (S23e)                                                         | 4859.21461 | -0.8220996 | 0.1410455  | -5.8286125 | 1.75E-07   |
| Cytochrome O ubiquinol oxidase subunit II                                                 | 8174.7509  | -0.8253167 | 0.14660413 | -5.6295599 | 5.06E-07   |
| FIG00639065: hypothetical protein                                                         | 39.4776029 | -0.8266911 | 0.32199648 | -2.5673917 | 0.03937157 |
| Transposase YhgA                                                                          | 71.9915992 | -0.8280245 | 0.23744765 | -3.4871875 | 0.00342402 |
| Iron(III) dicitrate transport system permease protein FecC (TC 3.A.1.14.1)                | 409.710578 | -0.8291408 | 0.11975131 | -6.9238559 | 2.34E-10   |
| ID=Gene:EBG0000313283                                                                     | 35.9648682 | -0.8299305 | 0.32994529 | -2.5153579 | 0.04441064 |
| ID=Gene:EBG0000313290                                                                     | 35.9648682 | -0.8299305 | 0.32994529 | -2.5153579 | 0.04441064 |
| Probable microcin H47 secretion/processing ATP-binding protein mchF                       | 1897.19603 | -0.8308193 | 0.1400337  | -5.9329957 | 9.63E-08   |
| FIG00639275: hypothetical protein                                                         | 356.487003 | -0.8308392 | 0.16727413 | -4.9669317 | 1.31E-05   |
| UPF0313 protein ygiQ                                                                      | 853.764384 | -0.8346244 | 0.19053106 | -4.3805163 | 0.00014953 |
| LSU ribosomal protein L10p (P0)                                                           | 9807.32752 | -0.8356813 | 0.14575396 | -5.7335064 | 2.92E-07   |
| Colicin I receptor precursor                                                              | 8828.14569 | -0.8456034 | 0.19804088 | -4.2698428 | 0.00022625 |
| ID=Gene:EBG00000313275                                                                    | 48.5788764 | -0.8474508 | 0.27823935 | -3.045762  | 0.01202632 |
| ID=Gene:EBG00000313277                                                                    | 48.5788764 | -0.8474508 | 0.27823935 | -3.045762  | 0.01202632 |
| ID=Gene:EBG00000313278                                                                    | 48.5788764 | -0.8474508 | 0.27823935 | -3.045762  | 0.01202632 |
| ID=Gene:EBG00000313281                                                                    | 48.5788764 | -0.8474508 | 0.27823935 | -3.045762  | 0.01202632 |
| ID=Gene:EBG00000313282                                                                    | 48.5788764 | -0.8474508 | 0.27823935 | -3.045762  | 0.01202632 |
| ID=Gene:EBG00000313305                                                                    | 48.5788764 | -0.8474508 | 0.27823935 | -3.045762  | 0.01202632 |
| Arginine/ornithine antiporter ArcD                                                        | 253.725426 | -0.8475075 | 0.15838114 | -5.3510635 | 2.17E-06   |
| Translation initiation factor 1                                                           | 1399.23179 | -0.8485328 | 0.17497622 | -4.8494176 | 2.19E-05   |
| Serine transporter                                                                        | 370.853602 | -0.8566234 | 0.16878352 | -5.0752788 | 8.12E-06   |
| SSU ribosomal protein S14p (S29e) @ SSU ribosomal protein S14p (S29e)%2C zinc-independent | 12694.6835 | -0.8607791 | 0.12371149 | -6.9579564 | 1.89E-10   |
| FIG00639812: hypothetical protein                                                         | 34.03305   | -0.8657513 | 0.34792685 | -2.488314  | 0.0470445  |
| Inner membrane protein translocase component YidC%2C long form                            | 4376.35652 | -0.8726664 | 0.18486502 | -4.72056   | 3.73E-05   |
| Oligopeptide transport system OppB (TC 3.A.1.5.1)                                         | 1949.61076 | -0.8742428 | 0.17555897 | -4.9797675 | 1.24E-05   |
| MchC protein                                                                              | 2724.36984 | -0.8775756 | 0.16974602 | -5.1710056 | 5.23E-06   |
| LSU ribosomal protein L2p (L8e)                                                           | 15822.2664 | -0.8812465 | 0.17012792 | -5.1799054 | 5.03E-06   |
| Putative protease                                                                         | 856.675488 | -0.8828043 | 0.15446061 | -5.7154004 | 3.18E-07   |
| 4-hydroxybenzoyl-CoA thioesterase family active site                                      | 311.52654  | -0.8847746 | 0.23803706 | -3.7169615 | 0.00165617 |
| LSU ribosomal protein L5p (L11e)                                                          | 16545.5443 | -0.8925039 | 0.1347744  | -6.6222065 | 1.71E-09   |
| Ribonuclease P protein component                                                          | 923.659149 | -0.8984335 | 0.21705259 | -4.1392435 | 0.00037325 |
| Flagellar biosynthesis protein FlIB                                                       | 437.932851 | -0.8989436 | 0.18630073 | -4.8252284 | 2.44E-05   |
| Hypothetical protein yqgB                                                                 | 54.4410204 | -0.9062861 | 0.31471173 | -2.8797341 | 0.01827833 |
| hypothetical protein                                                                      | 166.841032 | -0.9097051 | 0.25742866 | -3.5338145 | 0.0029858  |
| SSU ribosomal protein S19p (S15e)                                                         | 1941.75408 | -0.9097771 | 0.18001943 | -5.0537715 | 8.85E-06   |
| Permease of the drug/metabolite transporter (DMT) superfamily                             | 891.750038 | -0.9136549 | 0.22217121 | -4.1123911 | 0.00040815 |
| LSU ribosomal protein L23p (L23Ae)                                                        | 6314.60346 | -0.9138743 | 0.17608874 | -5.1898506 | 4.80E-06   |
| Glutamyl-tRNA reductase                                                                   | 1716.31879 | -0.9193003 | 0.14865779 | -6.1840036 | 2.38E-08   |
| Glucans biosynthesis protein C                                                            | 89.3560546 | -0.9203646 | 0.26364886 | -3.4908728 | 0.00340542 |
| ID=Gene:EBG00000313286                                                                    | 130.832878 | -0.928616  | 0.3084297  | -3.0107866 | 0.01323243 |
| ID=Gene:EBG00000313289                                                                    | 130.832878 | -0.928616  | 0.3084297  | -3.0107866 | 0.01323243 |
| FIG00642441: hypothetical protein                                                         | 126.095384 | -0.9332146 | 0.18910087 | -4.9350096 | 1.52E-05   |
| ID=Gene:EBG00000313274                                                                    | 47.1612848 | -0.9417136 | 0.34312762 | -2.7444995 | 0.02572801 |
| ID=Gene:EBG00000313276                                                                    | 47.1612848 | -0.9417136 | 0.34312762 | -2.7444995 | 0.02572801 |
| ID=Gene:EBG00000313306                                                                    | 47.1612848 | -0.9417136 | 0.34312762 | -2.7444995 | 0.02572801 |
| ID=Gene:EBG00000313308                                                                    | 47.1612848 | -0.9417136 | 0.34312762 | -2.7444995 | 0.02572801 |
| ID=Gene:EBG00000313311                                                                    | 47.1612848 | -0.9417136 | 0.34312762 | -2.7444995 | 0.02572801 |
| Flagellar motor switch protein FlII                                                       | 278.499722 | -0.9437199 | 0.26011769 | -3.6280495 | 0.00220952 |
| Putative inner membrane protein YjeT (clustered with HfIC)                                | 68.276868  | -0.9468962 | 0.23582941 | -4.0151746 | 0.00058296 |
| SSU ribosomal protein S8p (S15Ae)                                                         | 6952.40928 | -0.9480547 | 0.13047253 | -7.2663165 | 2.29E-11   |
| hypothetical protein                                                                      | 63.9334328 | -0.952447  | 0.25265714 | -3.7697212 | 0.00137731 |
| Inactive homolog of metal-dependent proteases%2Cputative molecular chaperone              | 300.01309  | -0.9556303 | 0.22268842 | -4.2913339 | 0.00020916 |
| SSU ribosomal protein S18p @ SSU ribosomal protein S18p%2C zinc-independent               | 4196.40735 | -0.9612083 | 0.13159303 | -7.3044011 | 1.78E-11   |
| hypothetical protein                                                                      | 59.0841954 | -0.9743514 | 0.28360338 | -3.4356128 | 0.00400085 |
| Putative secretion permease                                                               | 676.7642   | -0.9769247 | 0.16378944 | -5.9645157 | 8.18E-08   |
| Flagellar motor switch protein FlIM                                                       | 428.354608 | -0.9812725 | 0.21498114 | -4.5644585 | 6.88E-05   |
| FIG00638351: hypothetical protein                                                         | 231.834055 | -0.9976626 | 0.20842487 | -4.7866772 | 2.85E-05   |
| Peptide chain release factor 1                                                            | 1137.37889 | -1.002938  | 0.12674225 | -7.9132099 | 2.07E-13   |
| RNA polymerase sigma factor for flagellar operon                                          | 9275.76089 | -1.0049511 | 0.18800155 | -5.3454402 | 2.22E-06   |
| Flagellar biosynthesis protein FlIQ                                                       | 203.143854 | -1.0126807 | 0.24820536 | -4.0800112 | 0.00045781 |
| FIG00641578: hypothetical protein                                                         | 1095.18172 | -1.0130774 | 0.37209515 | -2.7226299 | 0.02723957 |
| Hybrid sensory histidine kinase in two-component regulatory system with EvgA              | 1416.36106 | -1.0179169 | 0.1769862  | -5.7513914 | 2.66E-07   |
| LSU ribosomal protein L24p (L26e)                                                         | 9238.05816 | -1.0189529 | 0.12174709 | -8.3694228 | 5.97E-15   |
| Flagellar biosynthesis protein FlIL                                                       | 229.678194 | -1.0277344 | 0.29473935 | -3.4869262 | 0.00342402 |
| LSU ribosomal protein L14p (L23e)                                                         | 7100.06713 | -1.0300291 | 0.15446356 | -6.668428  | 1.27E-09   |
| Putative transcriptional regulator LYSR-type                                              | 66.8604371 | -1.0375367 | 0.27843297 | -3.726343  | 0.00160489 |
| Mobile element protein                                                                    | 198.095139 | -1.0405555 | 0.21742207 | -4.7858778 | 2.85E-05   |
| Flagellar basal-body rod modification protein FlgD                                        | 1456.38122 | -1.0413767 | 0.27580738 | -3.7757389 | 0.00135455 |
| Ornithine carbamoyltransferase                                                            | 104.83429  | -1.0434434 | 0.3300103  | -3.1618511 | 0.00892433 |
| ID=Gene:EBG00000313297                                                                    | 43.3192899 | -1.0462181 | 0.31199637 | -3.3533021 | 0.00517223 |
| Putative fimbrial-like protein                                                            | 31.9381756 | -1.048183  | 0.40718722 | -2.5742041 | 0.0387031  |
| Flagellar protein FlgJ [peptidoglycan hydrolase]                                          | 516.178169 | -1.0566755 | 0.25882621 | -4.0825675 | 0.00045382 |
| Flagellar basal-body P-ring formation protein FlgA                                        | 418.213254 | -1.0585113 | 0.26786432 | -3.9516696 | 0.00073155 |
| LSU ribosomal protein L4p (L1e)                                                           | 14053.1302 | -1.0732312 | 0.1689898  | -6.3508641 | 9.16E-09   |
| Flagellar hook protein FlgE                                                               | 3234.93459 | -1.0804059 | 0.25543247 | -4.2297125 | 0.00026195 |
| LSU ribosomal protein L3p (L3e)                                                           | 16017.8849 | -1.0846584 | 0.14998406 | -7.2318244 | 2.92E-11   |
| Flagellar basal-body rod protein FlgG                                                     | 1152.20791 | -1.0891292 | 0.26894727 | -4.049601  | 0.00051237 |
| Flagellar motor switch protein FlIG                                                       | 657.294734 | -1.0962131 | 0.23458924 | -4.6729046 | 4.53E-05   |
| Fumarate hydratase class II%2C anaerobic                                                  | 274.383422 | -1.0971524 | 0.19619368 | -5.5921904 | 6.20E-07   |
| FIG00637865: hypothetical protein                                                         | 768.794502 | -1.1018401 | 0.20264882 | -5.4371899 | 1.38E-06   |
| hypothetical protein                                                                      | 77.7115028 | -1.1064554 | 0.25694541 | -4.3061887 | 0.00019714 |
| FIG139552: Putative protease                                                              | 59.5981328 | -1.1096529 | 0.26558931 | -4.1780783 | 0.00032352 |
| Putative exported protein                                                                 | 89.0434493 | -1.1162708 | 0.28553523 | -3.9093977 | 0.0008458  |



|                                                                                                          |            |            |            |            |            |
|----------------------------------------------------------------------------------------------------------|------------|------------|------------|------------|------------|
| ID=gene:EBG00000313300                                                                                   | 34.2567863 | -1.1232303 | 0.33954968 | -3.308     | 0.00590078 |
| LSU ribosomal protein L31p @ LSU ribosomal protein L31p%2C zinc-dependent                                | 1228.26454 | -1.1365431 | 0.18736387 | -6.065967  | 4.65E-08   |
| Dl/tripeptide permease DtpA                                                                              | 3846.66891 | -1.1380404 | 0.14539726 | -7.8271106 | 3.97E-13   |
| Outer membrane protein W precursor                                                                       | 424.516582 | -1.1433658 | 0.25466427 | -4.4896986 | 9.35E-05   |
| Flagellar protein FljI                                                                                   | 87.6135071 | -1.1467892 | 0.34701984 | -3.3046791 | 0.00595464 |
| Putrescine importer                                                                                      | 761.255253 | -1.1467994 | 0.24843347 | -4.6161226 | 5.72E-05   |
| ATP-dependent RNA helicase RhlE                                                                          | 1374.56084 | -1.1475905 | 0.14931738 | -7.685579  | 1.15E-12   |
| Hydrogenase-2 operon protein hybA precursor                                                              | 212.171858 | -1.15025   | 0.1631008  | -7.0523875 | 9.84E-11   |
| FIG139928: Putative protease                                                                             | 71.9385186 | -1.1507496 | 0.25251971 | -4.5570682 | 7.08E-05   |
| DNA-binding protein Fis                                                                                  | 659.728129 | -1.1530279 | 0.18739192 | -6.1530291 | 2.83E-08   |
| Flagellar basal-body rod protein FlgF                                                                    | 1045.642   | -1.1597956 | 0.27518272 | -4.2146381 | 0.00027734 |
| Periplasmic binding protein                                                                              | 386.489621 | -1.1712581 | 0.1537669  | -7.6171015 | 1.93E-12   |
| SSU ribosomal protein S21p                                                                               | 406.609056 | -1.1792313 | 0.24339363 | -4.8449554 | 2.23E-05   |
| Arginine deiminase                                                                                       | 98.0274479 | -1.1877162 | 0.27126695 | -4.3784035 | 0.00015057 |
| Flagellar P-ring protein FlgI                                                                            | 744.596026 | -1.1877786 | 0.24116135 | -4.9252445 | 1.59E-05   |
| Flagellum-specific ATP synthase Flil                                                                     | 534.243086 | -1.1911626 | 0.28613463 | -4.1629448 | 0.00034241 |
| Flagellar basal-body rod protein FlgC                                                                    | 712.104017 | -1.1963352 | 0.37458417 | -3.1937687 | 0.00813159 |
| ID=gene:EBG00000313288                                                                                   | 64.0815478 | -1.2054349 | 0.38538032 | -3.1279099 | 0.00977025 |
| Molybdenum transport system protein ModD                                                                 | 176.300695 | -1.2099629 | 0.21482376 | -5.6323515 | 5.01E-07   |
| Flagellar protein FlhE                                                                                   | 130.129162 | -1.2133162 | 0.23314493 | -5.2041284 | 4.56E-06   |
| Flagellar basal-body rod protein FlgB                                                                    | 481.631213 | -1.228433  | 0.28359146 | -4.3316994 | 0.0001789  |
| Flagellar L-ring protein FlgH                                                                            | 485.48977  | -1.2357403 | 0.29046689 | -4.2543241 | 0.00023901 |
| Cold-shock DEAD-box protein A                                                                            | 22647.6572 | -1.2368604 | 0.10746188 | -11.50976  | 2.54E-28   |
| Flagellar assembly protein FlhH                                                                          | 303.562829 | -1.2390429 | 0.26808076 | -4.6219017 | 5.60E-05   |
| LSU ribosomal protein L11p (L12e)                                                                        | 4015.01682 | -1.2497356 | 0.16725303 | -7.4721253 | 5.50E-12   |
| Uptake hydrogenase small subunit precursor                                                               | 587.458305 | -1.2527273 | 0.13494505 | -9.2832402 | 2.01E-18   |
| FIG00638267: hypothetical protein                                                                        | 42.5372276 | -1.2586241 | 0.29721126 | -4.2347792 | 0.00025887 |
| 4'-phosphopantetheinyl transferase                                                                       | 1161.89135 | -1.2586377 | 0.16279821 | -7.7312752 | 8.18E-13   |
| Diaminopimelate decarboxylase                                                                            | 6472.01914 | -1.2673289 | 0.26075653 | -4.8602002 | 2.10E-05   |
| Flagellar biosynthesis protein FljP                                                                      | 88.3318728 | -1.2794513 | 0.24977935 | -5.122326  | 6.61E-06   |
| SSU ribosomal protein S20p                                                                               | 1230.55228 | -1.2880937 | 0.20449539 | -6.298889  | 1.21E-08   |
| MchD protein                                                                                             | 525.726398 | -1.2926724 | 0.1754473  | -7.3678674 | 1.17E-11   |
| SSU ribosomal protein S10p (S20e)                                                                        | 6299.56762 | -1.298552  | 0.16088602 | -8.0712546 | 6.19E-14   |
| Protein-N(5)-glutamine methyltransferase PfmC%2Cmethylates polypeptide chain release factors RF1 and RF2 | 527.212162 | -1.3096719 | 0.14574549 | -8.9860196 | 3.06E-17   |
| Putative exported protein                                                                                | 988.445577 | -1.317259  | 0.42000411 | -3.1363003 | 0.00958887 |
| FIG002082: Protein SirB2                                                                                 | 122.610051 | -1.3185397 | 0.23755097 | -5.5505547 | 7.64E-07   |
| Hypothetical MFS-type transporter protein YcaD                                                           | 1178.62952 | -1.3403891 | 0.37041616 | -3.6186032 | 0.00228625 |
| Hemin ABC transporter%2C permease protein                                                                | 142.024875 | -1.3538261 | 0.2143956  | -6.3146169 | 1.31E-08   |
| Membrane protein with DUF350 domain                                                                      | 21.5135249 | -1.3589607 | 0.37733942 | -3.6014279 | 0.00241159 |
| Flagellar M-ring protein FljI                                                                            | 458.724116 | -1.3603312 | 0.2786814  | -4.8813132 | 1.93E-05   |
| ID=gene:EBG00000313299                                                                                   | 53.1112194 | -1.3901312 | 0.37562037 | -3.7008939 | 0.00172711 |
| Putative outer membrane protein                                                                          | 268.136693 | -1.4216495 | 0.23463969 | -6.0588618 | 4.75E-08   |
| C4-dicarboxylate transporter DcuB                                                                        | 170.574644 | -1.4331912 | 0.23439288 | -6.1144829 | 3.54E-08   |
| ID=gene:EBG00000313298                                                                                   | 43.2066235 | -1.4820631 | 0.30299965 | -4.891303  | 1.85E-05   |
| Cobalt-zinc-cadmium resistance protein CzcA%3B Cation efflux system protein CusA                         | 973.233768 | -1.4825367 | 0.36304077 | -4.0836644 | 0.0004527  |
| Orf2                                                                                                     | 204.742121 | -1.5093893 | 0.23435949 | -6.4404874 | 5.29E-09   |
| ABC-type hemin transport system%2C ATPase component                                                      | 161.937159 | -1.5186477 | 0.1914517  | -7.9322757 | 1.81E-13   |
| ID=gene:EBG00000313230                                                                                   | 15.764247  | -1.561168  | 0.49889132 | -3.1286477 | 0.0097577  |
| Cold shock protein CspA                                                                                  | 14785.1522 | -1.5884546 | 0.17937344 | -8.8555734 | 9.68E-17   |
| hypothetical protein                                                                                     | 44.467851  | -1.5898012 | 0.27591017 | -5.7594152 | 2.55E-07   |
| ID=gene:EBG00000313231                                                                                   | 31.5216564 | -1.6174331 | 0.45933209 | -3.5212718 | 0.00311563 |
| hypothetical protein                                                                                     | 93.1084095 | -1.6177744 | 0.34573522 | -4.6792294 | 4.43E-05   |
| Inositol-1-monophosphatase                                                                               | 1023.44228 | -1.6456319 | 0.26529372 | -6.2030563 | 2.15E-08   |
| FIG00637915: hypothetical protein                                                                        | 107.221215 | -1.6587678 | 0.32634116 | -5.0829254 | 7.84E-06   |
| hypothetical protein                                                                                     | 249.155953 | -1.6707535 | 0.6009494  | -2.7801901 | 0.0236164  |
| Ferrichrome-iron receptor                                                                                | 1823.59572 | -1.7110682 | 0.16778739 | -10.197836 | 3.28E-22   |
| Carbamate kinase                                                                                         | 57.0106501 | -1.7301014 | 0.33421484 | -5.1766147 | 5.10E-06   |
| Lead%2C cadmium%2C zinc and mercury transporting ATPase                                                  | 2026.16705 | -1.7735686 | 0.17279129 | -10.253543 | 1.92E-22   |
| Pyruvate formate-lyase                                                                                   | 4339.8671  | -1.7868553 | 0.2519247  | -7.0928148 | 7.54E-11   |
| ID=gene:EBG00000313307                                                                                   | 25.4326063 | -1.8946258 | 0.56371717 | -3.3609511 | 0.00507051 |
| ID=gene:EBG00000313312                                                                                   | 25.4326063 | -1.8946258 | 0.56371717 | -3.3609511 | 0.00507051 |
| ID=gene:EBG00000313225                                                                                   | 33.9133917 | -2.1102381 | 0.48694555 | -4.3336223 | 0.00017781 |
| FIG00638707: hypothetical protein                                                                        | 86.0994746 | -2.5729017 | 0.3141226  | -8.1907564 | 2.45E-14   |
| Cobalt/zinc/cadmium efflux RND transporter%2Cmembrane fusion protein%2C CzcB family                      | 607.183489 | -3.1720634 | 0.7745105  | -4.0955718 | 0.00043593 |
| Cation efflux system protein CusC precursor                                                              | 238.119615 | -3.7191147 | 0.92758112 | -4.0094765 | 0.00059463 |
| ID=gene:EBG00000313254                                                                                   | 55.1263514 | -4.157494  | 1.46105968 | -2.8455333 | 0.01994811 |
| Cation efflux system protein CusF precursor                                                              | 112.910026 | -4.589993  | 1.01386839 | -4.5272079 | 7.94E-05   |
| ID=gene:EBG00000313296                                                                                   | 506.024089 | -4.6713897 | 0.95792248 | -4.8765843 | 1.97E-05   |
