# Supplementary material for: Engineered calprotectin-sensing probiotics for IBD surveillance in humans
Source: Proc Natl Acad Sci U S A. 2023 Jul 31;120(32):e2221121120. doi: 10.1073/pnas.2221121120 (PMC10410751; doi:10.1073/pnas.2221121120)
Supplement: Supplementary file 2 — Dataset S01 (PDF) [file pnas.2221121120.sd01.pdf]

Supplemental Table 1: Statistically Differentially Expressed Genes M9

| Gene Description                                                                                        | baseMean   | log2FoldChar | lfcSE      | stat       | padj       |
|---------------------------------------------------------------------------------------------------------|------------|--------------|------------|------------|------------|
| LSU ribosomal protein L31p @ LSU ribosomal protein L31p%2C zinc-independent                             | 4159.9521  | 8.3312552    | 0.22599637 | 36.8645538 | 2.02E-294  |
| LSU ribosomal protein L36p                                                                              | 1554.82149 | 7.8740522    | 0.22860914 | 34.4432955 | 4.47E-257  |
| FIG00638682: hypothetical protein                                                                       | 25967.6907 | 6.29642581   | 0.11411961 | 55.1739159 | 0          |
| Putative metal chaperone%2C involved in Zn homeostasis%2C GTPase of COG0523 family                      | 9273.1339  | 6.27532017   | 0.12902424 | 48.6367542 | 0          |
| membrane%3B Transport of small molecules: Cations                                                       | 22974.0827 | 6.02893123   | 0.11835208 | 50.9406463 | 0          |
| Candidate zinc-binding lipoprotein ZinT                                                                 | 13069.6575 | 5.97716781   | 0.17287756 | 34.5745736 | 5.76E-259  |
| Zinc ABC transporter%2C periplasmic-binding protein ZnuA                                                | 12598.5021 | 4.53923021   | 0.22522956 | 20.1537946 | 1.07E-87   |
| FIG00638093: hypothetical protein                                                                       | 2.89087556 | 3.55481229   | 1.37776426 | 2.580131   | 0.02321148 |
| Alpha-ketoglutarate permease                                                                            | 657.254932 | 3.50966298   | 0.15970969 | 21.9752658 | 2.53E-104  |
| Ornithine carbamoyltransferase                                                                          | 48486.8631 | 3.1397282    | 0.71084397 | 4.41690207 | 4.41E-05   |
| Enoyl-CoA hydratase                                                                                     | 354.42919  | 3.03978973   | 0.18249888 | 16.6564842 | 4.43E-60   |
| FIG01045439: hypothetical protein                                                                       | 5903.77371 | 3.02131138   | 0.11626351 | 25.9867547 | 4.13E-146  |
| Cell wall endopeptidase%2C family M23/M37                                                               | 4553.34112 | 2.84757025   | 0.10523714 | 27.0586049 | 2.04E-158  |
| Acetylglutamate kinase                                                                                  | 17147.9007 | 2.75949496   | 0.48893753 | 5.64386001 | 1.01E-07   |
| Argininosuccinate lyase                                                                                 | 25827.4056 | 2.75849349   | 0.44733493 | 6.16650588 | 5.00E-09   |
| L-2-hydroxyglutarate oxidase                                                                            | 670.483158 | 2.70879712   | 0.1524794  | 17.7650039 | 3.67E-68   |
| gamma-aminobutyrate (GABA) permease                                                                     | 360.740592 | 2.70530055   | 0.23211585 | 11.6549581 | 7.76E-30   |
| Uncharacterized GST-like protein yncG                                                                   | 18.8817548 | 2.61331432   | 0.54611683 | 4.78526604 | 8.38E-06   |
| N-acetyl-gamma-glutamyl-phosphate reductase                                                             | 14889.1258 | 2.57166721   | 0.51282599 | 5.01469746 | 2.76E-06   |
| 3-ketocetyl-CoA thiolase                                                                                | 359.070086 | 2.56377676   | 0.15924776 | 16.0992951 | 3.49E-56   |
| Glycerol-3-phosphate ABC transporter%2C permease protein UgpA (TC 3.A.1.1.3)                            | 83.0643008 | 2.5256736    | 0.24621442 | 10.2580246 | 2.48E-23   |
| Biotin synthesis protein BioC                                                                           | 1289.76354 | 2.5035288    | 0.22607521 | 11.073876  | 4.79E-27   |
| Zinc ABC transporter%2C inner membrane permease protein ZnuB                                            | 1749.13293 | 2.46077146   | 0.15580722 | 15.7936934 | 4.40E-54   |
| Gamma-aminobutyrate:alpha-ketoglutarate aminotransferase                                                | 2265.85659 | 2.45062623   | 0.14005402 | 17.497722  | 2.94E-66   |
| hypothetical protein                                                                                    | 12.9929209 | 2.44502431   | 0.56971201 | 4.29168468 | 7.45E-05   |
| hypothetical protein                                                                                    | 60.5205562 | 2.4398318    | 0.26871669 | 9.07956928 | 1.81E-18   |
| FIG00642236: hypothetical protein                                                                       | 39.3546132 | 2.4325895    | 0.3594961  | 6.76852677 | 1.13E-10   |
| Succinate-semialdehyde dehydrogenase [NADP+]                                                            | 2125.23673 | 2.42537769   | 0.13749907 | 17.63923   | 2.91E-67   |
| Arginine ABC transporter%2C periplasmic arginine-binding protein ArtJ                                   | 18931.5814 | 2.42457143   | 0.56726009 | 4.27417944 | 8.02E-05   |
| FIG00638909: hypothetical protein                                                                       | 204.639028 | 2.41927867   | 0.20973467 | 11.5349488 | 2.99E-29   |
| Adenosylmethionine-8-amino-7-oxononanoate aminotransferase                                              | 1853.29017 | 2.38824604   | 0.37357288 | 6.39298551 | 1.26E-09   |
| Glycerol-3-phosphate ABC transporter%2C permease protein UgpE (TC 3.A.1.1.3)                            | 128.939216 | 2.36525379   | 0.19913166 | 11.8778387 | 5.94E-31   |
| Phosphate starvation-inducible protein PhoH%2Cpredicted ATPase                                          | 61570.2327 | 2.31849404   | 0.21920568 | 10.5767972 | 9.31E-25   |
| Lactate-responsive regulator LldR in Enterobacteria%2C GntR family                                      | 322.357714 | 2.31743476   | 0.1989355  | 11.6491764 | 8.24E-30   |
| Arginine ABC transporter%2C permease protein ArtM                                                       | 2227.75402 | 2.31736913   | 0.18052094 | 12.8371209 | 5.28E-36   |
| Biotin synthase                                                                                         | 1339.7991  | 2.3076781    | 0.23161401 | 9.96346498 | 4.65E-22   |
| Arginine ABC transporter%2C permease protein ArtQ                                                       | 3671.57437 | 2.29785426   | 0.16005795 | 14.3563896 | 7.79E-45   |
| Acetyl-coenzyme A synthetase                                                                            | 1194.6021  | 2.2879276    | 0.14524013 | 15.7527234 | 8.19E-54   |
| N-acetylglutamate synthase                                                                              | 6238.6552  | 2.27788742   | 0.45685253 | 4.98604534 | 3.18E-06   |
| Dethiobiotin synthetase                                                                                 | 718.414487 | 2.26007124   | 0.1928098  | 11.7217653 | 3.62E-30   |
| aconitate hydratase                                                                                     | 3934.90816 | 2.25488876   | 0.11717414 | 19.2439105 | 5.01E-80   |
| Zinc ABC transporter%2C ATP-binding protein ZnuC                                                        | 3765.81775 | 2.21225687   | 0.14948652 | 14.7990389 | 1.41E-47   |
| Carbon starvation induced protein CsiD                                                                  | 299.49305  | 2.20914532   | 0.14958523 | 14.7684724 | 2.05E-47   |
| putative protein PaaI%2C possibly involved in aromatic compounds catabolism                             | 301.064824 | 2.18357964   | 0.17675121 | 12.3539728 | 2.17E-33   |
| Nitrate/nitrite transporter                                                                             | 1028.59898 | 2.17547684   | 0.19574188 | 11.1140081 | 3.11E-27   |
| Arginine N-succinyltransferase                                                                          | 177.240431 | 2.15628012   | 0.17364571 | 12.4176986 | 1.00E-33   |
| Succinylglutamic semialdehyde dehydrogenase                                                             | 368.976354 | 2.14284619   | 0.13304314 | 16.1064012 | 3.20E-56   |
| Respiratory nitrate reductase beta chain                                                                | 1141.26917 | 2.09270382   | 0.17792273 | 11.7618685 | 2.27E-30   |
| L-lactate permease                                                                                      | 412.007405 | 2.07994456   | 0.17857911 | 11.6471888 | 8.37E-30   |
| Arginine ABC transporter%2C ATP-binding protein ArtP                                                    | 3371.88701 | 2.06368388   | 0.18060039 | 11.4267964 | 9.96E-29   |
| Respiratory nitrate reductase alpha chain                                                               | 3188.60171 | 2.05736744   | 0.18716753 | 10.9921171 | 1.17E-26   |
| Stage V sporulation protein involved in spore cortex synthesis (SpoVR)                                  | 7392.3733  | 2.05591422   | 0.13989267 | 14.6963688 | 8.55E-47   |
| Argininosuccinate synthase                                                                              | 24521.9554 | 2.04264795   | 0.40166557 | 5.08544446 | 1.95E-06   |
| Glycerol-3-phosphate ABC transporter%2C ATP-binding protein UgpC (TC 3.A.1.1.3)                         | 1062.91148 | 2.03803907   | 0.14458576 | 14.095711  | 2.94E-43   |
| Acetylornithine aminotransferase                                                                        | 3047.65923 | 2.02668277   | 0.46953003 | 4.31640717 | 6.69E-05   |
| Respiratory nitrate reductase delta chain                                                               | 451.462866 | 2.01650704   | 0.17316205 | 11.6452017 | 8.51E-30   |
| UPF0229 protein Yeah                                                                                    | 5606.61024 | 2.01597121   | 0.18256319 | 11.0425943 | 6.74E-27   |
| FIG00638803: hypothetical protein                                                                       | 30.8688754 | 1.95284866   | 0.40544939 | 4.81650409 | 7.20E-06   |
| Glycolate dehydrogenase                                                                                 | 518.888175 | 1.9433716    | 0.14750735 | 13.1747444 | 6.99E-38   |
| Succinylglutamate desuccinylase                                                                         | 204.099759 | 1.9386221    | 0.17483733 | 11.0881476 | 4.11E-27   |
| Malate:quinone oxidoreductase                                                                           | 1933.89006 | 1.90891269   | 0.18082156 | 10.5568863 | 1.15E-24   |
| Serine protein kinase (prkA protein)%2C P-loop containing                                               | 25603.7954 | 1.90382375   | 0.17891425 | 10.6409846 | 4.86E-25   |
| Arginine ABC transporter%2C periplasmic arginine-binding protein ArtI                                   | 8730.75211 | 1.90332833   | 0.14880242 | 12.7909766 | 9.47E-36   |
| Cold shock protein CspG                                                                                 | 1632.47579 | 1.87577392   | 0.14127639 | 13.2773345 | 1.83E-38   |
| 8-amino-7-oxononanoate synthase                                                                         | 2315.43297 | 1.87036375   | 0.2045578  | 9.14344878 | 1.01E-18   |
| Protein ygiW precursor                                                                                  | 577.797212 | 1.85821061   | 0.18179045 | 10.2217172 | 3.54E-23   |
| L-proline glycine betaine binding ABC transporter protein ProX (TC 3.A.1.12.1)                          | 1589.38934 | 1.7859385    | 0.21262462 | 8.3994905  | 6.11E-16   |
| Succinylarginine dihydrolase                                                                            | 392.851807 | 1.78382712   | 0.12432514 | 14.3480801 | 8.64E-45   |
| Acetolactate synthase small subunit                                                                     | 409.102322 | 1.77355483   | 0.18166639 | 9.76270186 | 3.16E-21   |
| LysR family transcriptional regulator YdcI                                                              | 558.785885 | 1.76641842   | 0.15754107 | 11.2124315 | 1.06E-27   |
| hypothetical protein                                                                                    | 64.5176293 | 1.74921143   | 0.26407358 | 6.62395476 | 2.90E-10   |
| Glycerol-3-phosphate ABC transporter%2C periplasmic glycerol-3-phosphate-binding protein (TC 3.A.1.1.3) | 640.094984 | 1.73470655   | 0.12292486 | 14.1119258 | 2.37E-43   |
| Curli production assembly/transport component CsgF                                                      | 262.188683 | 1.731338803  | 0.14452542 | 11.9798166 | 1.88E-31   |
| Alanine racemase                                                                                        | 6420.7976  | 1.72108186   | 0.11927149 | 14.4299518 | 2.78E-45   |
| Citrate synthase (si)                                                                                   | 34824.5074 | 1.70310613   | 0.14184524 | 12.0067908 | 1.40E-31   |
| Acetolactate synthase large subunit                                                                     | 2333.06692 | 1.69324772   | 0.23809106 | 7.11176526 | 1.09E-11   |
| Osmotically inducible protein OsmY                                                                      | 30903.101  | 1.67223355   | 0.15786338 | 10.5929162 | 7.92E-25   |
| Glycolate utilization operon transcriptional activator GlcC                                             | 369.171499 | 1.66962128   | 0.15665839 | 10.6577202 | 4.13E-25   |
| FIG01220641: hypothetical protein                                                                       | 1440.35321 | 1.66167965   | 0.15052279 | 11.0393888 | 6.95E-27   |
| Lysine-arginine-ornithine-binding periplasmic protein precursor (TC 3.A.1.3.1)                          | 90.0433688 | 1.6591965    | 0.22087604 | 7.51188981 | 6.15E-13   |
| HTH-type transcriptional regulator gadW                                                                 | 737.09523  | 1.6538028    | 0.18846372 | 8.77517836 | 2.56E-17   |
| Lysine-arginine-ornithine-binding periplasmic protein precursor (TC 3.A.1.3.1)                          | 23.8163111 | 1.65163231   | 0.40618903 | 4.06616668 | 0.00018749 |
| Succinate dehydrogenase iron-sulfur protein                                                             | 3179.61141 | 1.64126201   | 0.12044408 | 13.6267557 | 1.78E-40   |
| UPF0410 protein YmgE                                                                                    | 74.6591253 | 1.64074541   | 0.28984438 | 5.66078051 | 9.23E-08   |
| FIG00638507: hypothetical protein                                                                       | 9.3773631  | 1.63980538   | 0.57133538 | 2.87012749 | 0.01062485 |
| L-lactate dehydrogenase                                                                                 | 1384.85743 | 1.63879718   | 0.10848368 | 15.1063931 | 1.51E-49   |
| Osmoprotectant ABC transporter permease protein YehY                                                    | 414.760017 | 1.62717031   | 0.15302089 | 10.6336484 | 5.23E-25   |
| Succinate dehydrogenase flavoprotein subunit                                                            | 4475.24257 | 1.60789453   | 0.1343579  | 11.9672499 | 2.17E-31   |
| Hypothetical protein ycgF                                                                               | 475.646157 | 1.60696297   | 0.15052287 | 10.6758725 | 3.45E-25   |
| FIG00639204: hypothetical protein                                                                       | 85.7799927 | 1.59572256   | 0.23995498 | 6.65009152 | 2.45E-10   |
| Putative cytoplasmic protein                                                                            | 467.832544 | 1.59545865   | 0.15424342 | 10.3437711 | 1.03E-23   |
| Sodium-dependent phosphate transporter                                                                  | 1825.26224 | 1.56527849   | 0.13442449 | 11.6442951 | 8.53E-30   |
| Glycolate dehydrogenase                                                                                 | 316.21172  | 1.56111611   | 0.13078079 | 11.9368916 | 3.07E-31   |
| Di/tripeptide permease YbgH                                                                             | 5458.50101 | 1.55810339   | 0.22010999 | 7.07874893 | 1.37E-11   |
| Arginine/ornithine antiporter ArcD                                                                      | 428.803072 | 1.55502683   | 0.17738436 | 8.76642583 | 2.76E-17   |
| Cell filamentation protein fic                                                                          | 1697.96776 | 1.54949436   | 0.13730503 | 11.2850514 | 4.78E-28   |
| Alkanesulfonate utilization operon LysR-family regulator Cbl                                            | 683.118156 | 1.53640082   | 0.09878491 | 15.5529911 | 1.71E-52   |
| Acetylornithine deacetylase                                                                             | 6752.05556 | 1.5354763    | 0.1685994  | 9.10724665 | 1.41E-18   |
| FIG00638355: hypothetical protein                                                                       | 2064.28686 | 1.53272782   | 0.13127301 | 11.6758795 | 6.11E-30   |
| Curli production assembly/transport component CsgE                                                      | 294.578471 | 1.5247585    | 0.16098944 | 9.47117064 | 5.02E-20   |
| Trehalose-6-phosphate phosphatase                                                                       | 1161.2132  | 1.52074027   | 0.13313659 | 11.4224066 | 1.04E-28   |
| Hypothetical ABC transporter ATP-binding protein yddA                                                   | 413.312735 | 1.51451555   | 0.14251298 | 10.6272711 | 5.57E-25   |
| FIG00643276: hypothetical protein                                                                       | 115.267439 | 1.51311685   | 0.22109387 | 6.84377583 | 8.66E-11   |
| Putrescine transport system permease protein PotH (TC 3.A.1.11.2)                                       | 2097.23737 | 1.50982166   | 0.14572669 | 10.3606394 | 8.73E-24   |
| Cytochrome B561                                                                                         | 172.726442 | 1.50980885   | 0.15269811 | 9.88754142 | 9.74E-22   |

|                                                                                        |            |            |            |            |            |
|----------------------------------------------------------------------------------------|------------|------------|------------|------------|------------|
| D-amino acid dehydrogenase small subunit                                               | 7215.43682 | 1.49694753 | 0.16211022 | 9.23413394 | 4.45E-19   |
| FIG01045643: hypothetical protein                                                      | 40.3110779 | 1.49571975 | 0.34281058 | 4.36310845 | 5.50E-05   |
| Putrescine transport ATP-binding protein PotA (TC 3.A.1.11.1)                          | 287.160716 | 1.49419856 | 0.15043459 | 9.93254665 | 6.26E-22   |
| L-proline glycine betaine ABC transport system permease protein ProW (TC 3.A.1.12.1)   | 1250.61763 | 1.48525295 | 0.18762505 | 7.91606966 | 2.94E-14   |
| Glycolate permease                                                                     | 113.486833 | 1.48524678 | 0.20041436 | 7.41088016 | 1.27E-12   |
| Glutamate Aspartate transport system permease protein GluJ (TC 3.A.1.3.4)              | 144.636946 | 1.47764579 | 0.22479431 | 6.57332383 | 3.98E-10   |
| Starvation sensing protein RspA                                                        | 76.6017634 | 1.47756747 | 0.23647422 | 6.24832358 | 3.03E-09   |
| Putrescine transport ATP-binding protein PotG (TC 3.A.1.11.2)                          | 4217.36034 | 1.47543614 | 0.17017627 | 8.67004652 | 6.33E-17   |
| Putative exported protein                                                              | 3900.09451 | 1.47395035 | 0.14410729 | 10.2281456 | 3.33E-23   |
| Outer membrane lipoprotein Blc                                                         | 2342.23673 | 1.47123107 | 0.16876283 | 8.71774339 | 4.18E-17   |
| Glutamate Aspartate transport system permease protein GltK (TC 3.A.1.3.4)              | 873.639845 | 1.46603932 | 0.13770927 | 10.6459014 | 4.63E-25   |
| Succinate dehydrogenase hydrophobic membrane anchor protein                            | 577.867346 | 1.46565141 | 0.18916037 | 7.7481947  | 1.05E-13   |
| Glycoprotein-polysaccharide metabolism                                                 | 6906.81452 | 1.46338258 | 0.12940945 | 11.3081587 | 3.70E-28   |
| FIG00639943: hypothetical protein                                                      | 3931.58384 | 1.4508654  | 0.1073333  | 13.5173837 | 7.69E-40   |
| Phage protein                                                                          | 14.9049411 | 1.44478783 | 0.45055389 | 3.20669258 | 0.00392119 |
| Acyl-CoA dehydrogenases                                                                | 1423.93951 | 1.44291728 | 0.1200042  | 12.02389   | 1.16E-31   |
| Protein YcgL                                                                           | 897.180231 | 1.42710663 | 0.08443172 | 16.902493  | 7.56E-62   |
| L-proline glycine betaine ABC transport system permease protein ProV (TC 3.A.1.12.1)   | 2026.02263 | 1.41290464 | 0.16690565 | 8.4652894  | 3.56E-16   |
| FIG00638676: hypothetical protein                                                      | 189.559569 | 1.40644563 | 0.27613353 | 5.09335326 | 1.88E-06   |
| Succinate dehydrogenase cytochrome b-556 subunit                                       | 693.509918 | 1.4013063  | 0.17258917 | 8.11931786 | 5.85E-15   |
| ID=gene:EBG00000313225                                                                 | 35.873071  | 1.39895816 | 0.3726309  | 3.75427311 | 0.00061469 |
| Isochrute lyase                                                                        | 1920.08317 | 1.39605339 | 0.13367774 | 10.4434245 | 3.73E-24   |
| Probable secreted protein                                                              | 5708.78007 | 1.3853089  | 0.19327193 | 7.16766731 | 7.28E-12   |
| FIG005189: putative transferase clustered with tellurite resistance proteins TehA/TehB | 405.301792 | 1.38435325 | 0.17983866 | 7.69775115 | 1.55E-13   |
| probable beta-D-galactosidase                                                          | 16.3543351 | 1.38194402 | 0.46475649 | 2.97347975 | 0.00790587 |
| Putative carboxymethylenebutenolidase                                                  | 4107.68282 | 1.38108398 | 0.12157808 | 11.3596467 | 2.07E-28   |
| Putrescine ABC transporter putrescine-binding protein PotF (TC 3.A.1.11.2)             | 10915.3739 | 1.37657022 | 0.17405744 | 7.90871219 | 3.11E-14   |
| ID=gene:EBG00000313252                                                                 | 13.8319692 | 1.37113974 | 0.52116544 | 2.63091072 | 0.02033695 |
| FIG00638962: hypothetical protein                                                      | 24.4875929 | 1.37057157 | 0.33194479 | 4.12891423 | 0.00014454 |
| Transcriptional regulator CsgD for 2nd curli operon                                    | 800.609456 | 1.36304987 | 0.1440057  | 9.46524918 | 5.29E-20   |
| Glutamate Aspartate transport system permease protein GluI (TC 3.A.1.3.4)              | 1177.06183 | 1.35530507 | 0.11307496 | 11.9858987 | 1.76E-31   |
| Acetolactate synthase small subunit                                                    | 3558.38002 | 1.35378027 | 0.13748721 | 9.84659041 | 1.43E-21   |
| Transcriptional regulator%2C GntR family                                               | 38.0702289 | 1.35156777 | 0.28564734 | 4.73159578 | 1.08E-05   |
| Butyryl-CoA dehydrogenase                                                              | 1034.52859 | 1.34937577 | 0.15139905 | 8.91270967 | 7.91E-18   |
| Periplasmic protein YajC                                                               | 4663.72542 | 1.34815375 | 0.11293206 | 11.9377416 | 3.07E-31   |
| ATP-dependent Clp protease ATP-binding subunit ClpA                                    | 94182.8776 | 1.34744501 | 0.14497376 | 9.29440651 | 2.60E-19   |
| FIG00637934: hypothetical protein                                                      | 112.229574 | 1.34662686 | 0.17693238 | 7.61096893 | 2.98E-13   |
| Sulfite reductase [NADPH] flavoprotein alpha-component                                 | 5892.88834 | 1.34549301 | 0.12009611 | 11.2034683 | 1.16E-27   |
| Succinylornithine transaminase                                                         | 171.361996 | 1.33787806 | 0.1780604  | 7.51361915 | 6.09E-13   |
| Putrescine transport system permease protein PotI (TC 3.A.1.11.2)                      | 1604.10313 | 1.33342902 | 0.12689478 | 10.5081473 | 1.89E-24   |
| Respiratory nitrate reductase gamma chain                                              | 380.18954  | 1.32751687 | 0.1850988  | 7.17193644 | 7.10E-12   |
| Malate synthase                                                                        | 1424.61401 | 1.32712465 | 0.13588778 | 9.76632836 | 3.06E-21   |
| Histidine ABC transporter%2C permease protein HisM (TC 3.A.1.3.1)                      | 2070.31042 | 1.32346433 | 0.16736302 | 7.90774652 | 3.12E-14   |
| HTH-type transcriptional regulator gadX                                                | 2462.3037  | 1.32239138 | 0.17338513 | 7.626902   | 2.65E-13   |
| Curli production assembly/transport component CsgG                                     | 911.292567 | 1.32082531 | 0.14150884 | 9.33387163 | 1.82E-19   |
| Spermidine Putrescine ABC transporter permease component potC (TC_3.A.1.11.1)          | 162.000192 | 1.32013653 | 0.19735668 | 6.68908964 | 1.91E-10   |
| FIG00638205: hypothetical protein                                                      | 20.1385186 | 1.315778   | 0.3629054  | 3.62567766 | 0.00097323 |
| YcgN (Fragment)                                                                        | 705.891695 | 1.31428229 | 0.09345734 | 14.0629113 | 4.60E-43   |
| type 1 fimbriae regulatory protein FimB                                                | 15.3718119 | 1.30906096 | 0.40096806 | 3.26475121 | 0.00326199 |
| Alpha%2Calpha-trehalose-phosphate synthase [UDP-forming]                               | 2813.45187 | 1.30717597 | 0.15866748 | 8.23846182 | 2.26E-15   |
| Taurine-binding periplasmic protein TauA                                               | 455.779725 | 1.30380918 | 0.19292728 | 6.75803432 | 1.21E-10   |
| Alkanesulfonates transport system permease protein                                     | 288.82546  | 1.30326789 | 0.21074289 | 6.18416074 | 4.50E-09   |
| Blue copper oxidase CueO precursor                                                     | 4279.56105 | 1.30289993 | 0.10932778 | 11.9173731 | 3.85E-31   |
| Mobile element protein                                                                 | 92.5412217 | 1.29637317 | 0.25709891 | 5.04231296 | 2.42E-06   |
| Cold shock protein CspA                                                                | 21580.2587 | 1.29607563 | 0.15378701 | 8.42773141 | 4.85E-16   |
| Sulfate and thiosulfate binding protein CysP                                           | 8429.56124 | 1.29433418 | 0.1328356  | 9.74388052 | 3.78E-21   |
| Two-component system response regulator QseB                                           | 140.060131 | 1.29024498 | 0.21472332 | 6.00887213 | 1.27E-08   |
| probable secreted protein STY4010                                                      | 35.1837626 | 1.2899594  | 0.27573922 | 4.67818623 | 1.38E-05   |
| Putative integral membrane protein                                                     | 501.526734 | 1.28277684 | 0.11781229 | 10.888311  | 3.60E-26   |
| Osmoprotectant ABC transporter ATP-binding subunit YehX                                | 493.129345 | 1.27971978 | 0.16854874 | 7.59258002 | 3.42E-13   |
| Entericidin B precursor                                                                | 78.3067711 | 1.27604062 | 0.35374162 | 3.60726736 | 0.001039   |
| Stationary phase inducible protein CsiE                                                | 550.666224 | 1.27521177 | 0.16981977 | 7.50920657 | 6.27E-13   |
| FIG00641190: hypothetical protein                                                      | 179.026192 | 1.27440096 | 0.2095595  | 6.08133238 | 8.33E-09   |
| FIG00637999: hypothetical protein                                                      | 3600.36341 | 1.26889329 | 0.13075501 | 9.70435658 | 5.51E-21   |
| Osmoprotectant ABC transporter binding protein YehZ                                    | 755.753134 | 1.2608289  | 0.1286912  | 9.79732017 | 2.28E-21   |
| Sulfate transport system permease protein CysT                                         | 3652.59024 | 1.25678839 | 0.09700828 | 12.955476  | 1.19E-36   |
| NAD(P)H-flavin oxidoreductase                                                          | 80.173648  | 1.25333433 | 0.26895758 | 4.65997023 | 1.50E-05   |
| TsgA protein homolog                                                                   | 611.596422 | 1.24759749 | 0.14905716 | 8.36992645 | 7.79E-16   |
| Protein raD                                                                            | 321.594568 | 1.24369949 | 0.14640029 | 8.49519833 | 2.79E-16   |
| Glutamate Aspartate transport ATP-binding protein GltL (TC 3.A.1.3.4)                  | 1524.36584 | 1.2433861  | 0.09854679 | 12.167215  | 8.36E-35   |
| prophage DLP12 integrase                                                               | 24.2696031 | 1.23887163 | 0.33881367 | 3.65649839 | 0.00087402 |
| Iron-sulfur cluster assembly protein SufB                                              | 5462.36463 | 1.23784742 | 0.12922359 | 9.57911324 | 1.79E-20   |
| FIG00639538: hypothetical protein                                                      | 1437.65365 | 1.23729205 | 0.15073669 | 8.20830069 | 2.87E-15   |
| Putrescine aminotransferase                                                            | 4480.12917 | 1.23271237 | 0.13971894 | 8.82280089 | 1.69E-17   |
| Lead%2C cadmium%2C zinc and mercury transporting ATPase                                | 55227.1043 | 1.23054577 | 0.11438139 | 10.7582689 | 1.46E-25   |
| Zinc transporter ZitB                                                                  | 483.303353 | 1.22860771 | 0.13019733 | 9.43650475 | 6.91E-20   |
| Endonuclease/Exonuclease/phosphatase family protein                                    | 1032.47372 | 1.22724867 | 0.21455576 | 5.71990297 | 6.64E-08   |
| Selenoprotein O and cysteine-containing homologs                                       | 1577.93817 | 1.22508991 | 0.14134317 | 8.66748562 | 6.45E-17   |
| Lipid A biosynthesis (KDO) 2-(lauroyl)-lipid IVA acyltransferase                       | 848.062346 | 1.22174028 | 0.09996978 | 12.2210955 | 1.11E-32   |
| Inner membrane protein YphA                                                            | 1344.72815 | 1.22076027 | 0.14835622 | 8.22857512 | 2.44E-15   |
| Iron binding protein SufA for iron-sulfur cluster assembly                             | 1414.94436 | 1.21311064 | 0.12083103 | 10.0397274 | 2.20E-22   |
| Sulfur acceptor protein SufE for iron-sulfur cluster assembly                          | 1303.3253  | 1.21039156 | 0.13120826 | 9.22496469 | 4.83E-19   |
| L%2CD-transpeptidase YcbB                                                              | 12615.5579 | 1.20940043 | 0.06878363 | 17.5826772 | 7.19E-67   |
| Cell division protein BolA                                                             | 6060.4257  | 1.20853954 | 0.1812269  | 6.66865445 | 2.19E-10   |
| Histidine ABC transporter%2C ATP-binding protein HisP (TC 3.A.1.3.1)                   | 1201.20657 | 1.20818956 | 0.15962446 | 7.56895022 | 4.05E-13   |
| hypothetical protein                                                                   | 56.633403  | 1.20421195 | 0.23461327 | 5.13275298 | 1.55E-06   |
| Potassium efflux system KefA protein / Small-conductance mechanosensitive channel      | 642.460302 | 1.20370158 | 0.12053908 | 9.98598611 | 3.74E-22   |
| Putative transport protein                                                             | 36.3232535 | 1.20141205 | 0.33505848 | 3.58567875 | 0.0012012  |
| probable ribonuclease inhibitor YPO3690                                                | 97.9696432 | 1.20055075 | 0.25132875 | 4.77681415 | 8.70E-06   |
| ID=gene:EBG00000313286                                                                 | 212.767355 | 1.20019157 | 0.18320794 | 6.55098022 | 4.56E-10   |
| ID=gene:EBG00000313289                                                                 | 212.767355 | 1.20019157 | 0.18320794 | 6.55098022 | 4.56E-10   |
| Osmoprotectant ABC transporter inner membrane protein YehW                             | 296.185709 | 1.1977575  | 0.21646158 | 5.53334921 | 1.83E-07   |
| Isochrute dehydrogenase phosphatase                                                    | 411.255081 | 1.19134138 | 0.12691559 | 9.38687955 | 1.10E-19   |
| FIG00638313: hypothetical protein                                                      | 36.6273069 | 1.18756783 | 0.42820925 | 2.7733353  | 0.0139183  |
| FIG143828: Hypothetical protein YbgA                                                   | 1097.87101 | 1.18657609 | 0.14485182 | 8.1916545  | 3.28E-15   |
| Glycolate dehydrogenase                                                                | 515.223131 | 1.1837964  | 0.09789022 | 12.0931021 | 5.08E-32   |
| Alkanesulfonates-binding protein                                                       | 437.0333   | 1.1834963  | 0.25000504 | 4.73388981 | 1.07E-05   |
| Inner membrane protein YbhQ                                                            | 430.859742 | 1.17345603 | 0.17619743 | 6.65989296 | 2.32E-10   |
| Inner membrane protein YhjD                                                            | 663.602518 | 1.17061217 | 0.10265609 | 11.403241  | 1.27E-28   |
| Invasin                                                                                | 37.5013204 | 1.16965378 | 0.29081303 | 4.02201299 | 0.00022432 |
| Putative membrane protein%2C clustering with ActP                                      | 73.0636633 | 1.16751026 | 0.25443648 | 4.58861198 | 2.07E-05   |
| Putative transport protein                                                             | 208.641741 | 1.14947173 | 0.17382625 | 6.61276276 | 3.10E-10   |
| Deoxyribodipyrimidine photolase                                                        | 3283.44819 | 1.14896471 | 0.12494887 | 9.19547921 | 6.33E-19   |
| Superoxide dismutase [Cu-Zn] precursor                                                 | 1074.71181 | 1.14738098 | 0.16800976 | 6.82925212 | 7.55E-11   |
| Probable glutathione S-transferase                                                     | 250.711631 | 1.14484232 | 0.21926244 | 5.22133342 | 9.84E-07   |
| Putative inner membrane protein                                                        | 116.456038 | 1.14458065 | 0.18443492 | 6.20587826 | 3.93E-09   |
| Acetolactate synthase large subunit                                                    | 11164.8352 | 1.14144822 | 0.19045023 | 5.99341989 | 1.38E-08   |

|                                                                                                 |            |            |            |            |            |
|-------------------------------------------------------------------------------------------------|------------|------------|------------|------------|------------|
| Glucans biosynthesis protein C                                                                  | 130.056986 | 1.13804521 | 0.17850539 | 6.37541103 | 1.40E-09   |
| UPF0319 protein YccT precursor                                                                  | 243.785649 | 1.13787671 | 0.16007722 | 7.10829873 | 1.11E-11   |
| ID=gene:EBG00000313288                                                                          | 153.617788 | 1.13443822 | 0.45152086 | 2.5124824  | 0.02757299 |
| L%2CD-transpeptidase YnhG                                                                       | 5259.74533 | 1.13050984 | 0.12241282 | 9.23522411 | 4.42E-19   |
| Ren protein                                                                                     | 141.460007 | 1.1267051  | 0.16410051 | 6.86594508 | 5.93E-11   |
| Sialic acid-induced transmembrane protein Yjht(NanM)%2C possible mutarotase                     | 6227.37332 | 1.12668604 | 0.13029278 | 8.64734076 | 7.60E-17   |
| Putative Heme-regulated two-component response regulator                                        | 425.787979 | 1.12279314 | 0.19887492 | 5.64572529 | 1.00E-07   |
| FIG00638107: hypothetical protein                                                               | 1384.09237 | 1.11989909 | 0.17583857 | 6.36890482 | 1.46E-09   |
| Malate dehydrogenase                                                                            | 14083.8596 | 1.11935875 | 0.09231464 | 12.1254741 | 3.49E-32   |
| Spermidine Putrescine ABC transporter permease component PotB (TC 3.A.1.11.1)                   | 157.471351 | 1.11473306 | 0.183928   | 6.06070356 | 9.39E-09   |
| FIG00639812: hypothetical protein                                                               | 46.6355368 | 1.11392812 | 0.3273927  | 3.40242196 | 0.00208437 |
| FIG00638559: hypothetical protein                                                               | 2179.16649 | 1.10278    | 0.17017454 | 6.48028793 | 7.23E-10   |
| ID=gene:EBG00000313283                                                                          | 59.5437031 | 1.101558   | 0.28345462 | 3.88618818 | 0.00037667 |
| ID=gene:EBG00000313290                                                                          | 59.5437031 | 1.101558   | 0.28345462 | 3.88618818 | 0.00037667 |
| putative transport                                                                              | 338.028838 | 1.09882581 | 0.17459921 | 6.29341819 | 2.30E-09   |
| multidrug resistance protein A                                                                  | 14.4490862 | 1.09657946 | 0.43568544 | 2.51690635 | 0.02728224 |
| Iron-sulfur cluster assembly protein SufD                                                       | 8512.39007 | 1.09321702 | 0.11441797 | 9.55459195 | 2.27E-20   |
| ATP-dependent RNA helicase                                                                      | 1246.69568 | 1.09238269 | 0.13090253 | 8.34500838 | 9.49E-16   |
| Cardiolipin synthetase                                                                          | 1507.28476 | 1.09008279 | 0.16910955 | 6.44601567 | 8.99E-10   |
| Choline dehydrogenase                                                                           | 34272.1579 | 1.08675616 | 0.08454828 | 12.8536763 | 4.31E-36   |
| Probable zinc protease pqqL                                                                     | 1415.93612 | 1.08247899 | 0.17067342 | 6.34239927 | 1.72E-09   |
| Transaldolase                                                                                   | 3969.27961 | 1.07947998 | 0.13805567 | 7.81916457 | 6.15E-14   |
| Glutamate Aspartate periplasmic binding protein precursor GltI (TC 3.A.1.3.4)                   | 548.82202  | 1.07845878 | 0.18625924 | 5.79009553 | 4.46E-08   |
| MFS permease protein                                                                            | 59.8452248 | 1.0777071  | 0.25299801 | 4.25974531 | 8.51E-05   |
| ABC transporter%2C periplasmic spermidine putrescine-binding protein PotD (TC 3.A.1.11.1)       | 797.100072 | 1.07655882 | 0.14951128 | 7.20051911 | 5.82E-12   |
| Dihydroxy-acid dehydratase                                                                      | 24010.8344 | 1.07414467 | 0.1318594  | 8.14613646 | 4.74E-15   |
| Sulfate transport system permease protein CysW                                                  | 5532.30943 | 1.07359174 | 0.09022948 | 11.8984588 | 4.71E-31   |
| Universal stress protein B                                                                      | 1456.99736 | 1.07107714 | 0.17674783 | 6.05991678 | 9.42E-09   |
| UPF0098 protein ybhB                                                                            | 1476.25184 | 1.06882006 | 0.13607523 | 7.8546259  | 4.70E-14   |
| Di/tripeptide permease DtpB                                                                     | 603.66592  | 1.06681371 | 0.10149511 | 10.5109864 | 1.85E-24   |
| Sensory histidine kinase QseC                                                                   | 262.888166 | 1.06540915 | 0.15455671 | 6.89332179 | 4.92E-11   |
| Iron-sulfur cluster assembly ATPase protein SufC                                                | 3408.4347  | 1.06297334 | 0.12787365 | 8.31268498 | 1.24E-15   |
| D-galactonate transporter                                                                       | 476.514838 | 1.06293845 | 0.13697405 | 7.76014491 | 9.65E-14   |
| Glucose dehydrogenase%2C PQQ-dependent                                                          | 33003.5315 | 1.0626786  | 0.12362209 | 8.59618705 | 1.18E-16   |
| FIG00638140: hypothetical protein                                                               | 801.99003  | 1.05724713 | 0.19380281 | 5.45527257 | 2.82E-07   |
| Inner membrane ABC transporter permease protein YqjO                                            | 18.7401854 | 1.05667499 | 0.37263221 | 2.8357049  | 0.01170581 |
| Para-aminobenzoate synthase%2C amidotransferase component                                       | 357.397537 | 1.05401722 | 0.13136366 | 8.02365927 | 1.25E-14   |
| ID=gene:EBG00000313239                                                                          | 20.0026609 | 1.05090934 | 0.367999   | 2.85573965 | 0.0110579  |
| Sulfate-binding protein Sbp                                                                     | 583.233604 | 1.04886737 | 0.11736988 | 8.93642707 | 6.49E-18   |
| PhnB protein%3B putative DNA binding 3-demethylubiquinone-9 3-methyltransferase domain protein  | 312.243371 | 1.04416734 | 0.15312724 | 6.81895226 | 8.03E-11   |
| Acetate permease ActP (cation/acetate symporter)                                                | 340.982437 | 1.04014866 | 0.1261642  | 8.2444044  | 2.16E-15   |
| Putative membrane protein                                                                       | 657.461967 | 1.03736923 | 0.15962715 | 6.49870151 | 6.43E-10   |
| Osmotically inducible lipoprotein E precursor                                                   | 2113.25436 | 1.03657373 | 0.17113363 | 6.05710112 | 9.54E-09   |
| Inner membrane protein YqjF                                                                     | 116.82166  | 1.03287873 | 0.22594171 | 4.57143891 | 2.24E-05   |
| Putative inner membrane protein                                                                 | 760.145979 | 1.03072186 | 0.10710317 | 9.62363544 | 1.17E-20   |
| FIG00639422: hypothetical protein                                                               | 1848.4743  | 1.02837794 | 0.16426505 | 6.26047922 | 2.81E-09   |
| Ferrichrome-iron receptor                                                                       | 1627.18633 | 1.02464094 | 0.18324387 | 5.59167921 | 1.35E-07   |
| Histidine ABC transporter%2C permease protein HisQ (TC 3.A.1.3.1)                               | 3434.09414 | 1.02110208 | 0.17094009 | 5.97344993 | 1.55E-08   |
| Sulfate adenylyltransferase subunit 2                                                           | 10388.2195 | 1.01939649 | 0.10338766 | 9.8599431  | 1.27E-21   |
| Cysteine desulfurase                                                                            | 5037.46928 | 1.01816726 | 0.13004909 | 7.82909926 | 5.71E-14   |
| FIG004405: Putative cytoplasmic protein                                                         | 476.462751 | 1.01485906 | 0.12716687 | 7.98053006 | 1.76E-14   |
| FIG00638524: hypothetical protein                                                               | 975.309396 | 1.01441858 | 0.11846578 | 8.56296743 | 1.57E-16   |
| Transcription regulator [contains diacylglycerol kinase catalytic domain]                       | 1297.28936 | 1.0074396  | 0.17114232 | 5.88656045 | 2.57E-08   |
| FIG010773: NAD-dependent epimerase/dehydratase                                                  | 28.4267675 | 1.00653883 | 0.33669159 | 2.98949795 | 0.00754143 |
| Cytoplasmic trehalase                                                                           | 3875.87493 | 1.00453577 | 0.13569906 | 7.40267279 | 1.35E-12   |
| PTS system%2C chitobiose-specific IIC component                                                 | 155.867513 | 1.00288474 | 0.16788412 | 5.97367244 | 1.55E-08   |
| FIG00638451: hypothetical protein                                                               | 983.113107 | 1.00287689 | 0.18120815 | 5.5343919  | 1.82E-07   |
| Putrescine importer                                                                             | 1196.40544 | 0.99873013 | 0.17419158 | 5.73351567 | 6.16E-08   |
| N-acetylneuraminic acid outer membrane channel protein NanC                                     | 30.814619  | 0.99800444 | 0.32936741 | 3.03006433 | 0.00672131 |
| FIG00637885: hypothetical protein                                                               | 156.098523 | 0.99746344 | 0.16618181 | 6.00224197 | 1.31E-08   |
| Succinyl-CoA ligase [ADP-forming] alpha chain                                                   | 23602.6953 | 0.99682101 | 0.10252104 | 9.72308683 | 4.62E-21   |
| FIG01045396: hypothetical protein                                                               | 77.3410312 | 0.99547975 | 0.26723871 | 3.72505824 | 0.00068229 |
| metal-dependent phosphohydrolase                                                                | 447.775581 | 0.98917572 | 0.13001857 | 7.60795742 | 3.04E-13   |
| FMN reductase                                                                                   | 220.245208 | 0.98409122 | 0.26401067 | 3.72746761 | 0.0006768  |
| Mobile element protein                                                                          | 88.3373059 | 0.98306464 | 0.19591211 | 5.01788603 | 2.72E-06   |
| FIG00639237: hypothetical protein                                                               | 3304.50931 | 0.97359658 | 0.20952738 | 4.64663185 | 1.60E-05   |
| 2-oxoglutarate dehydrogenase E1 component                                                       | 47226.9238 | 0.97280551 | 0.10084843 | 9.64621331 | 9.50E-21   |
| Putative PerM family permease                                                                   | 427.557408 | 0.97059939 | 0.13128821 | 7.39289055 | 1.45E-12   |
| Alcohol dehydrogenase                                                                           | 6716.73252 | 0.96904436 | 0.15325867 | 6.32293347 | 1.93E-09   |
| Succinyl-CoA ligase [ADP-forming] beta chain                                                    | 22335.0589 | 0.96865657 | 0.10015668 | 9.67141241 | 7.52E-21   |
| hypothetical protein                                                                            | 35.194391  | 0.96828663 | 0.28947949 | 3.44492306 | 0.0025203  |
| Alcohol dehydrogenase                                                                           | 2074.22017 | 0.96481256 | 0.14473262 | 6.66617211 | 2.23E-10   |
| Aconitate hydratase 2                                                                           | 64741.2459 | 0.96223806 | 0.09747336 | 9.87180544 | 1.13E-21   |
| UPF0028 protein YchK                                                                            | 1119.06345 | 0.96192981 | 0.08952328 | 10.745024  | 1.68E-25   |
| FIG00639826: hypothetical protein                                                               | 1479.55302 | 0.96035869 | 0.11714508 | 8.19802824 | 3.12E-15   |
| Putative transport protein                                                                      | 326.465187 | 0.95926248 | 0.12750636 | 7.52325176 | 5.68E-13   |
| Transketolase                                                                                   | 10991.5657 | 0.95897802 | 0.1405417  | 6.82344094 | 7.82E-11   |
| Putative cytoplasmic protein %2Cprobably associated with Glutathione-regulated potassium-efflux | 340.431781 | 0.95833633 | 0.15540888 | 6.16654807 | 5.00E-09   |
| Serine transporter                                                                              | 155.031187 | 0.95457074 | 0.1514481  | 6.30295618 | 2.17E-09   |
| 3-isopropylmalate dehydratase small subunit                                                     | 2117.65023 | 0.95346884 | 0.12059525 | 7.90635465 | 3.15E-14   |
| Gamma-glutamyltranspeptidase                                                                    | 2454.83478 | 0.95322769 | 0.14998241 | 6.35559652 | 1.59E-09   |
| Hnr protein                                                                                     | 1834.52069 | 0.9520369  | 0.0991388  | 9.60307085 | 1.43E-20   |
| Putative transport protein                                                                      | 100.87933  | 0.95001982 | 0.1828409  | 5.19588233 | 1.12E-06   |
| FIG01045311: hypothetical protein                                                               | 141.999043 | 0.94414988 | 0.22835873 | 4.13450309 | 0.00014166 |
| Luciferase-like monooxygenase                                                                   | 376.039436 | 0.94325713 | 0.15773651 | 5.97995417 | 1.50E-08   |
| PTS system%2C maltose and glucose-specific IIC component                                        | 36.147355  | 0.94120694 | 0.32815212 | 2.86820314 | 0.010678   |
| Putative lipase                                                                                 | 193.586995 | 0.93856334 | 0.15290078 | 6.13838156 | 5.94E-09   |
| probable lipoprotein                                                                            | 481.379167 | 0.93289045 | 0.21576646 | 4.32361196 | 6.50E-05   |
| Transposase                                                                                     | 16.3610077 | 0.93190411 | 0.38681535 | 2.40917046 | 0.03559677 |
| Inner membrane protein YqjE                                                                     | 7184.00992 | 0.9318878  | 0.13450853 | 6.92809461 | 3.87E-11   |
| FIG00638099: hypothetical protein                                                               | 94.3748779 | 0.92616551 | 0.2673746  | 3.46392483 | 0.00169145 |
| Glutamate transport ATP-binding protein                                                         | 9262.68558 | 0.92601559 | 0.1222372  | 7.57556252 | 3.86E-13   |
| Alkanesulfonate monooxygenase                                                                   | 714.020372 | 0.92560711 | 0.25365994 | 6.64900779 | 0.00089731 |
| Heme-regulated cyclic AMP phosphodiesterase                                                     | 2505.2806  | 0.92500236 | 0.12279759 | 7.53274019 | 5.31E-13   |
| Cytoplasmic protein YaiB                                                                        | 567.002172 | 0.92079048 | 0.38097369 | 2.41693985 | 0.03497767 |
| Regulator of sigma D                                                                            | 1549.34401 | 0.91668866 | 0.10356931 | 8.85096845 | 1.33E-17   |
| Branched-chain amino acid aminotransferase                                                      | 20796.5863 | 0.91405814 | 0.10260867 | 8.90819631 | 8.21E-18   |
| Glutamate synthase [NADPH] large chain                                                          | 37140.7567 | 0.91369176 | 0.11327722 | 8.06597969 | 9.00E-15   |
| High-affinity choline uptake protein BetT                                                       | 3903.55408 | 0.91267433 | 0.08524039 | 10.707064  | 2.51E-25   |
| L-cystine uptake protein TcyP                                                                   | 4590.47579 | 0.9121549  | 0.10277255 | 8.87547245 | 1.08E-17   |
| ID=gene:EBG00000313298                                                                          | 36.7180009 | 0.90553701 | 0.36882624 | 2.45518601 | 0.03185941 |
| Pyruvate oxidase [ubiquinone%2C cytochrome]                                                     | 11746.3283 | 0.90071029 | 0.15000206 | 6.00465296 | 1.30E-08   |
| Threonine dehydratase biosynthetic                                                              | 11265.8702 | 0.89862528 | 0.12125821 | 7.41084048 | 1.27E-12   |
| CsiR%2C transcriptional repressor of CsiD                                                       | 445.14875  | 0.8973634  | 0.18406733 | 4.875191   | 5.44E-06   |
| FIG00643552: hypothetical protein                                                               | 43.2855252 | 0.8950487  | 0.29972473 | 2.98623572 | 0.00760068 |
| Putative transport system permease protein                                                      | 27.3115831 | 0.89371415 | 0.34143135 | 2.61755153 | 0.02105488 |
| Probable tonB-dependent receptor yncD precursor                                                 | 743.602826 | 0.88972124 | 0.11027748 | 8.06802324 | 8.87E-15   |

|                                                                                                                                                               |            |            |            |            |            |
|---------------------------------------------------------------------------------------------------------------------------------------------------------------|------------|------------|------------|------------|------------|
| Putative lipase                                                                                                                                               | 1181.87359 | 0.886532   | 0.14564558 | 6.08691307 | 8.07E-09   |
| UPF0379 protein yjY precursor                                                                                                                                 | 42.0941742 | 0.88522754 | 0.33249844 | 2.66235098 | 0.01876088 |
| Transcriptional regulator%2C GntR family                                                                                                                      | 32.5568601 | 0.88467684 | 0.28531276 | 3.10072652 | 0.00544605 |
| FIG00896318: hypothetical protein                                                                                                                             | 261.759587 | 0.87842417 | 0.14899467 | 5.89567508 | 2.44E-08   |
| Inner membrane protein YqjK                                                                                                                                   | 5651.91378 | 0.8733717  | 0.12090712 | 7.22349298 | 4.93E-12   |
| Propionate catabolism operon regulatory protein PrpR                                                                                                          | 73.4675429 | 0.87330099 | 0.21635354 | 4.03645346 | 0.000212   |
| FIG00638412: hypothetical protein                                                                                                                             | 55.5446152 | 0.86843943 | 0.25194371 | 3.44695822 | 0.0017941  |
| Glutathione-regulated potassium-efflux system protein KefB                                                                                                    | 1314.91023 | 0.86725953 | 0.09857202 | 8.79823212 | 2.10E-17   |
| adherence and invasion outermembrane protein (Inv%2Cenhances Peyer's patches colonization)                                                                    | 260.791346 | 0.86478046 | 0.13647486 | 6.33655497 | 1.78E-09   |
| Glutathione S-transferase%2C omega                                                                                                                            | 781.583231 | 0.8639398  | 0.1299076  | 6.65041759 | 2.45E-10   |
| Ribosomal RNA large subunit methyltransferase A                                                                                                               | 282.937344 | 0.86083567 | 0.16520698 | 5.21064943 | 1.04E-06   |
| Putative transport protein                                                                                                                                    | 369.476461 | 0.86070556 | 0.11596976 | 7.42181014 | 1.18E-12   |
| hypothetical protein Yjdi                                                                                                                                     | 87.1206476 | 0.85686359 | 0.23895084 | 3.58594095 | 0.00111979 |
| Putative iron compound permease protein of ABC transporter family                                                                                             | 1392.80373 | 0.85442492 | 0.11083309 | 7.70911427 | 1.42E-13   |
| FIG00638997: hypothetical protein                                                                                                                             | 495.579937 | 0.85347929 | 0.1276713  | 6.68497371 | 1.97E-10   |
| type 1 fimbriae regulatory protein FimE                                                                                                                       | 69.333196  | 0.85287137 | 0.22752623 | 3.74845292 | 0.00062679 |
| adherence and invasion outermembrane protein (Inv%2Cenhances Peyer's patches colonization)                                                                    | 415.619984 | 0.84910349 | 0.10805077 | 7.85837548 | 4.58E-14   |
| FIG00638941: hypothetical protein                                                                                                                             | 3443.03809 | 0.84712209 | 0.13640732 | 6.21023927 | 3.83E-09   |
| FIG00639659: hypothetical protein                                                                                                                             | 27.7641841 | 0.84383127 | 0.31374825 | 2.68951706 | 0.01750409 |
| Glutamate Aspartate transport system permease protein GltK (TC 3.A.1.3.4)                                                                                     | 129.4046   | 0.84144664 | 0.16941091 | 4.96689756 | 3.50E-06   |
| PTS system%2C sorbose-specific IIC component                                                                                                                  | 30.702995  | 0.8408966  | 0.35276637 | 2.38372097 | 0.03776557 |
| hypothetical protein                                                                                                                                          | 45.8183889 | 0.83767256 | 0.30977163 | 2.70416169 | 0.01685559 |
| Hypothetical protein                                                                                                                                          | 2995.51158 | 0.83476251 | 0.10895062 | 7.66184237 | 2.04E-13   |
| 3-oxoacyl-[acyl-carrier protein] reductase                                                                                                                    | 61.3611064 | 0.83224214 | 0.25883106 | 3.21538746 | 0.00381847 |
| Rhodanese-related sulfurtransferases                                                                                                                          | 1037.56288 | 0.83210588 | 0.09829169 | 8.46567867 | 3.55E-16   |
| Taurine transport ATP-binding protein TauB                                                                                                                    | 644.137384 | 0.82990703 | 0.15395074 | 5.3907311  | 4.00E-07   |
| Glutamate synthase [NADPH] small chain                                                                                                                        | 13325.7724 | 0.82923628 | 0.08354057 | 9.92615041 | 6.65E-22   |
| hypothetical protein                                                                                                                                          | 244.231086 | 0.82394148 | 0.12717662 | 6.47871796 | 7.29E-10   |
| FIG00637864: hypothetical protein                                                                                                                             | 502.177101 | 0.82076007 | 0.10444529 | 7.85827785 | 4.58E-14   |
| Glutamate Aspartate periplasmic binding protein precursor GltI (TC 3.A.1.3.4)                                                                                 | 11405.7139 | 0.81655048 | 0.0987493  | 8.26892386 | 1.77E-15   |
| ID=gene:EBG00000313232                                                                                                                                        | 30.8539421 | 0.81611839 | 0.2976799  | 2.74159727 | 0.01519219 |
| ID=gene:EBG00000313246                                                                                                                                        | 30.8539421 | 0.81611839 | 0.2976799  | 2.74159727 | 0.01519219 |
| ID=gene:EBG00000313247                                                                                                                                        | 30.8539421 | 0.81611839 | 0.2976799  | 2.74159727 | 0.01519219 |
| Dipeptide transport system permease protein DppB (TC 3.A.1.5.2)                                                                                               | 642.67993  | 0.81578838 | 0.1611059  | 5.06367795 | 2.17E-06   |
| Soluble pyridine nucleotide transhydrogenase                                                                                                                  | 3813.21798 | 0.81541217 | 0.10689254 | 6.72833575 | 2.63E-13   |
| FIG00638228: hypothetical protein                                                                                                                             | 93.1890339 | 0.81502774 | 0.27890439 | 2.92224659 | 0.00916727 |
| Putative cytochrome oxidase subunit                                                                                                                           | 707.674735 | 0.81289253 | 0.17629856 | 4.61088588 | 1.88E-05   |
| Glutamate transport membrane-spanning protein                                                                                                                 | 5569.97827 | 0.8126757  | 0.11904395 | 6.6268599  | 7.67E-11   |
| Fumarate hydratase class II                                                                                                                                   | 1435.95899 | 0.81151365 | 0.11244668 | 7.21687485 | 5.17E-12   |
| Galactosamine-6-phosphate isomerase (galactosamine-6-phosphate deaminase)                                                                                     | 28.9942327 | 0.80477719 | 0.34716559 | 2.31812118 | 0.04394402 |
| Nucleoside diphosphate kinase                                                                                                                                 | 473.413814 | 0.80470633 | 0.15022284 | 5.35675081 | 4.80E-07   |
| PTS system%2C galactosamine-specific IIC component                                                                                                            | 59.5920063 | 0.80416133 | 0.26681936 | 3.01387921 | 0.00704137 |
| Protein yceL precursor                                                                                                                                        | 2121.53262 | 0.80277389 | 0.14095875 | 5.69509785 | 7.63E-08   |
| Uncharacterized membrane protein YqjD                                                                                                                         | 3658.42758 | 0.80224366 | 0.14384916 | 5.57697854 | 1.46E-07   |
| Integrase                                                                                                                                                     | 486.639274 | 0.8021123  | 0.12047602 | 6.65785864 | 2.34E-10   |
| Permease of the drug/metabolite transporter (DMT) superfamily                                                                                                 | 419.759368 | 0.80191981 | 0.14812904 | 5.41365711 | 3.54E-07   |
| Sulfite reductase [NADPH] hemoprotein beta-component                                                                                                          | 7021.28886 | 0.80039687 | 0.14368216 | 5.57060721 | 1.51E-07   |
| Isocitrate dehydrogenase [NADP]                                                                                                                               | 108220.546 | 0.7997833  | 0.08625804 | 9.27198517 | 3.19E-19   |
| Transcriptional regulator%2C TetR family                                                                                                                      | 180.659235 | 0.79861663 | 0.17344404 | 4.60446278 | 1.93E-05   |
| Putative inner membrane protein                                                                                                                               | 269.040779 | 0.79831682 | 0.15224353 | 5.2436829  | 8.74E-07   |
| 3-isopropylmalate dehydratase large subunit                                                                                                                   | 4383.97036 | 0.79641453 | 0.08573924 | 9.28879844 | 2.73E-19   |
| 2-isopropylmalate synthase                                                                                                                                    | 3091.27408 | 0.79584082 | 0.15830135 | 5.02737854 | 2.60E-06   |
| Dipeptide transport system permease protein DppC (TC 3.A.1.5.2)                                                                                               | 749.895687 | 0.79281085 | 0.13987262 | 5.66809163 | 8.87E-08   |
| Thioredoxin 2                                                                                                                                                 | 421.152745 | 0.79262079 | 0.14091848 | 5.624676   | 1.12E-07   |
| FIG00638146: hypothetical protein                                                                                                                             | 45.2349271 | 0.79119689 | 0.27611821 | 2.86542815 | 0.01076027 |
| FIG00639292: hypothetical protein                                                                                                                             | 342.297551 | 0.79078164 | 0.17157573 | 4.60893644 | 1.89E-05   |
| General secretion pathway protein C                                                                                                                           | 118.077392 | 0.78846448 | 0.17039391 | 4.62730426 | 1.74E-05   |
| Rtn protein                                                                                                                                                   | 273.213586 | 0.78752469 | 0.1248686  | 6.30682745 | 2.13E-09   |
| D-galactonate transporter                                                                                                                                     | 89.6025368 | 0.78603145 | 0.20467716 | 3.84034763 | 0.00044746 |
| ID=gene:EBG00000313233                                                                                                                                        | 38.0841824 | 0.78582731 | 0.29661952 | 2.64927709 | 0.0194111  |
| Allantoinase                                                                                                                                                  | 974.480729 | 0.78230555 | 0.11180977 | 6.9967548  | 2.42E-11   |
| Oxidoreductase                                                                                                                                                | 669.261068 | 0.78113805 | 0.13346373 | 5.85281154 | 3.13E-08   |
| Maltose O-acetyltransferase                                                                                                                                   | 2459.01779 | 0.78022214 | 0.13393065 | 5.82556832 | 3.63E-08   |
| 3-isopropylmalate dehydrogenase                                                                                                                               | 3635.21584 | 0.77992328 | 0.11080058 | 7.03898203 | 1.81E-11   |
| Putative GTP-binding protein YdgA                                                                                                                             | 12445.8944 | 0.77988835 | 0.09336153 | 8.35342337 | 8.89E-16   |
| HTH-type transcriptional regulator mIra                                                                                                                       | 765.885489 | 0.77850768 | 0.17829269 | 4.36645875 | 5.43E-05   |
| COG1399 protein%2C clustered with ribosomal protein L32p                                                                                                      | 6118.07203 | 0.77678807 | 0.13276681 | 8.50777024 | 3.16E-08   |
| Isopentenyl-diphosphate delta-isomerase                                                                                                                       | 526.733892 | 0.77652878 | 0.18447866 | 4.2093149  | 0.00010483 |
| FIG00637968: hypothetical protein                                                                                                                             | 214.881827 | 0.77608357 | 0.13898091 | 5.58410213 | 1.41E-07   |
| FIG00639587: hypothetical protein                                                                                                                             | 41.235708  | 0.7741973  | 0.31355477 | 2.46909752 | 0.03079454 |
| chaperone FimC                                                                                                                                                | 236.781544 | 0.77403647 | 0.19717605 | 3.92561105 | 0.00032457 |
| Methylglyoxal reductase%2C acetol producing                                                                                                                   | 3480.99838 | 0.77392514 | 0.13770372 | 5.6202194  | 1.15E-07   |
| putative exported protein                                                                                                                                     | 52.8902365 | 0.77301773 | 0.22891035 | 3.37694521 | 0.00226346 |
| NgrB                                                                                                                                                          | 97.5675486 | 0.77073663 | 0.25787584 | 2.98878963 | 0.00755032 |
| Inner membrane component of tripartite multidrug resistance system                                                                                            | 84.6792704 | 0.76935813 | 0.20323062 | 3.78564083 | 0.00054659 |
| FIG005119: putative inner membrane protein                                                                                                                    | 383.980361 | 0.76821564 | 0.12107839 | 6.34477898 | 1.70E-09   |
| Putative inner membrane protein                                                                                                                               | 231.693429 | 0.76633536 | 0.16116709 | 4.75491203 | 9.67E-06   |
| Putative oxidoreductase                                                                                                                                       | 799.270774 | 0.76623098 | 0.23376208 | 3.27782414 | 0.00313038 |
| expressed protein                                                                                                                                             | 57.4641677 | 0.76566109 | 0.28346836 | 2.70104602 | 0.0169878  |
| LysR family transcriptional regulator Ynfl                                                                                                                    | 231.679853 | 0.76305069 | 0.133435   | 5.71851985 | 6.69E-08   |
| hypothetical protein                                                                                                                                          | 102.997789 | 0.76217825 | 0.21338344 | 3.57187157 | 0.00117323 |
| Ribonuclease E                                                                                                                                                | 19609.4793 | 0.75986631 | 0.11289175 | 6.73092884 | 1.45E-10   |
| Permease of the drug/metabolite transporter (DMT) superfamily                                                                                                 | 50.9192055 | 0.75864587 | 0.2765402  | 2.74334755 | 0.01513529 |
| FIG00638229: hypothetical protein                                                                                                                             | 243.665559 | 0.75612213 | 0.13925628 | 5.42971642 | 3.24E-07   |
| N-3-oxohexanoyl-L-homoserine lactone quorum-sensing transcriptional activator @ N-3-oxooctanoyl-L-homoserine lactone quorum-sensing transcriptional activator | 1513.51985 | 0.75155442 | 0.10172584 | 7.3880386  | 1.50E-12   |
| Taurine transport system permease protein TauC                                                                                                                | 499.762195 | 0.7511196  | 0.14405785 | 5.2140135  | 1.02E-06   |
| Putative arylsulfatase regulatory protein                                                                                                                     | 244.909149 | 0.74709887 | 0.17489567 | 4.27168314 | 8.09E-05   |
| Tyrosine-specific transport protein                                                                                                                           | 210.050041 | 0.74523006 | 0.15977407 | 4.66427413 | 1.47E-05   |
| Aminomethyltransferase (glycine cleavage system T protein)                                                                                                    | 2236.434   | 0.74480022 | 0.09256109 | 8.04657966 | 1.05E-14   |
| Permease of the drug/metabolite transporter (DMT) superfamily                                                                                                 | 1199.44667 | 0.73904717 | 0.14323325 | 5.15974594 | 1.35E-06   |
| UPF0410 protein YeaQ                                                                                                                                          | 517.843308 | 0.73508252 | 0.2226401  | 3.30166267 | 0.00289626 |
| Acetyl-CoA:acetoacetyl-CoA transferase%2C alpha subunit                                                                                                       | 391.602177 | 0.73437702 | 0.15440371 | 4.7562136  | 9.62E-06   |
| Electron transport complex protein RnfB                                                                                                                       | 471.074249 | 0.7296783  | 0.13805234 | 5.28551907 | 7.06E-07   |
| 4-aminobutyraldehyde dehydrogenase                                                                                                                            | 783.107295 | 0.72856569 | 0.12058884 | 6.04173388 | 1.04E-08   |
| Phosphoadenylyl-sulfate reductase [thioredoxin]                                                                                                               | 2468.8612  | 0.72791049 | 0.13823361 | 5.26579957 | 7.81E-07   |
| Mobile element protein                                                                                                                                        | 323.273868 | 0.72753177 | 0.15577337 | 4.67045035 | 1.43E-05   |
| Z5092 protein                                                                                                                                                 | 36.3195792 | 0.72702669 | 0.27638574 | 2.63047828 | 0.0203423  |
| L%2CD-transpeptidase ErfK                                                                                                                                     | 1058.30064 | 0.72692206 | 0.08586618 | 8.46575545 | 3.55E-16   |
| COG1242: Predicted Fe-S oxidoreductase                                                                                                                        | 257.063462 | 0.72568151 | 0.14494884 | 5.00646641 | 2.88E-06   |
| Uncharacterized membrane lipoprotein clustered with tellurite resistance proteins TehA/TehB                                                                   | 1037.9224  | 0.72418529 | 0.11635641 | 6.22385384 | 3.53E-09   |
| Alkanesulfonates ABC transporter ATP-binding protein / Sulfonate ABC transporter%2C ATP-binding subunit SsuB                                                  | 416.4877   | 0.724094   | 0.18713095 | 3.86945083 | 0.0004016  |
| Rod shape-determining protein MreD                                                                                                                            | 404.671848 | 0.7234022  | 0.12434047 | 8.51791434 | 3.79E-08   |
| Ribonuclease P protein component                                                                                                                              | 1264.94081 | 0.71832344 | 0.11905534 | 6.03352547 | 1.09E-08   |
| FIG00638351: hypothetical protein                                                                                                                             | 197.956486 | 0.71666988 | 0.1909678  | 3.75283095 | 0.00061732 |
| Phosphate starvation-inducible protein PsfI                                                                                                                   | 751.249489 | 0.7147518  | 0.1285744  | 5.55905211 | 1.60E-07   |
| orf%3B Unknown function                                                                                                                                       | 29.3152169 | 0.71326683 | 0.30249354 | 2.35795723 | 0.04006265 |
| FIG094199: Fumarylacetoacetate hydrolase                                                                                                                      | 4239.01864 | 0.71082097 | 0.1218477  | 5.83368415 | 3.47E-08   |

|                                                                                               |            |            |            |            |            |
|-----------------------------------------------------------------------------------------------|------------|------------|------------|------------|------------|
| High-affinity branched-chain amino acid transport system permease protein LivH (TC 3.A.1.4.1) | 227.10355  | 0.70813835 | 0.1543168  | 4.5888611  | 2.07E-05   |
| Betaine aldehyde dehydrogenase                                                                | 24154.1064 | 0.7074038  | 0.08339619 | 8.48244773 | 3.10E-16   |
| Sodium-Choline Symporter                                                                      | 56.9712508 | 0.70579628 | 0.24010493 | 2.93953268 | 0.00872191 |
| Lipoprotein releasing system transmembrane protein LolC                                       | 1286.0605  | 0.70578526 | 0.07939373 | 8.88968564 | 9.60E-18   |
| Endonuclease VIII                                                                             | 2541.06218 | 0.70563553 | 0.12815537 | 5.50609408 | 2.13E-07   |
| Haemolysin expression modulating protein                                                      | 4019.30016 | 0.70540557 | 0.10767097 | 6.55149251 | 4.56E-10   |
| D-xylose transport ATP-binding protein XylG                                                   | 131.606275 | 0.70165068 | 0.18535952 | 3.78535019 | 0.00054682 |
| 3-hydroxydecanoyl-[acyl-carrier-protein] dehydratase                                          | 1551.91547 | 0.70145144 | 0.16987408 | 4.12924343 | 0.00014445 |
| Malate synthase G                                                                             | 3282.30725 | 0.70096001 | 0.08501595 | 8.24504149 | 2.16E-15   |
| Spermidine Putrescine ABC transporter permease component PotB (TC 3.A.1.11.1)                 | 704.442477 | 0.70015367 | 0.13343548 | 5.24713255 | 8.61E-07   |
| FIG00638765: hypothetical protein                                                             | 60.9609672 | 0.69889494 | 0.26195603 | 2.66798568 | 0.01852287 |
| Electron transport complex protein RnfA                                                       | 293.377057 | 0.69840311 | 0.14876812 | 4.69457502 | 1.28E-05   |
| Serine transporter                                                                            | 206.949672 | 0.69663536 | 0.1442563  | 4.82915047 | 6.78E-06   |
| Putative transport protein/putative regulator                                                 | 535.306758 | 0.69460699 | 0.10278127 | 6.75810861 | 1.21E-10   |
| hypothetical protein                                                                          | 78.7269097 | 0.69411257 | 0.19828903 | 3.50050921 | 0.00149757 |
| Maltodextrin phosphorylase                                                                    | 2207.42894 | 0.69343877 | 0.11855345 | 5.84916577 | 3.18E-08   |
| Phage tail fiber assembly protein                                                             | 32.9501609 | 0.68913302 | 0.28275461 | 2.4372123  | 0.03331278 |
| Proposed peptidoglycan lipid II flippase MurJ                                                 | 779.194793 | 0.6860763  | 0.12525082 | 5.47761912 | 2.50E-07   |
| Predicted sugar ABC transport system%2C periplasmic binding protein YphF precursor            | 68.5310173 | 0.68543397 | 0.22545053 | 3.04028552 | 0.00653055 |
| FIG00637898: hypothetical protein                                                             | 46.8769696 | 0.68536757 | 0.28756985 | 2.38330815 | 0.03777276 |
| FIG002337: predicted inner membrane protein                                                   | 3196.90294 | 0.68508635 | 0.09838798 | 6.96311048 | 3.04E-11   |
| Electron transport complex protein RnfC                                                       | 1572.51387 | 0.68356539 | 0.1189339  | 5.74743966 | 5.71E-08   |
| Putative molybdenum transport ATP-binding protein modF                                        | 10686.1545 | 0.6812973  | 0.07868724 | 8.65829494 | 6.95E-17   |
| Soluble aldose sugar dehydrogenase%2CPQQ-dependent                                            | 438.762761 | 0.68069675 | 0.12209068 | 5.57533757 | 1.47E-07   |
| Dihydrolipoamide succinyltransferase component (E2) of 2-oxoglutarate dehydrogenase complex   | 32472.193  | 0.67863994 | 0.08740003 | 7.76475643 | 9.33E-14   |
| Xylulose kinase                                                                               | 766.714649 | 0.67545108 | 0.13964454 | 4.83693166 | 6.55E-06   |
| Putative membrane protein                                                                     | 234.774746 | 0.67511922 | 0.13850419 | 4.87435943 | 5.46E-06   |
| Glycine dehydrogenase [decarboxylating] (glycine cleavage system P protein)                   | 6469.85647 | 0.66991025 | 0.10130692 | 6.61267977 | 3.10E-10   |
| FIG00639135: hypothetical protein                                                             | 36.8537912 | 0.66980436 | 0.27257594 | 2.45731283 | 0.03168655 |
| Lactam utilization protein LamB                                                               | 6317.83185 | 0.66901009 | 0.09948425 | 6.72478372 | 1.51E-10   |
| Low-affinity inorganic phosphate transporter                                                  | 3206.72521 | 0.66777461 | 0.12024138 | 5.55361744 | 1.65E-07   |
| putative permease of ferrichrome ABC transporter                                              | 1080.28576 | 0.66776418 | 0.12720802 | 5.24938722 | 8.51E-07   |
| Transcriptional regulatory protein YciT                                                       | 2771.3394  | 0.66502589 | 0.10149687 | 6.55218145 | 4.55E-10   |
| D-3-phosphoglycerate dehydrogenase                                                            | 99.8427276 | 0.66469406 | 0.20094811 | 3.30778965 | 0.00284633 |
| ID=gene:EBG00000313285                                                                        | 76.317398  | 0.66414671 | 0.19495165 | 3.40672534 | 0.00205721 |
| ID=gene:EBG00000313287                                                                        | 76.317398  | 0.66414671 | 0.19495165 | 3.40672534 | 0.00205721 |
| ABC-type polar amino acid transport system%2CATPase component                                 | 420.535413 | 0.66296559 | 0.12353203 | 3.56675041 | 4.56E-07   |
| LysR family transcriptional regulator YcjZ                                                    | 349.482073 | 0.66035554 | 0.11686383 | 5.65064113 | 9.76E-08   |
| hypothetical protein                                                                          | 48.6002504 | 0.65897502 | 0.257389   | 2.56022997 | 0.02444454 |
| 4-alpha-glucanotransferase (amylomaltase)                                                     | 1534.62934 | 0.65822696 | 0.10862279 | 6.05975017 | 9.42E-09   |
| Glutamate-aspartate carrier protein                                                           | 4662.5715  | 0.6580681  | 0.09033157 | 7.28502904 | 3.15E-12   |
| Branched-chain amino acid transport ATP-binding protein LivG (TC 3.A.1.4.1)                   | 308.759369 | 0.65805227 | 0.14958311 | 4.39924172 | 4.72E-05   |
| Mobile element protein                                                                        | 172.550232 | 0.65679519 | 0.13560342 | 4.84350015 | 6.35E-06   |
| tRNA dihydrouridine synthase B                                                                | 3258.21306 | 0.6557862  | 0.14182859 | 4.62379404 | 1.77E-05   |
| Putative purine permease ybbY                                                                 | 212.423574 | 0.6552354  | 0.14875208 | 4.40488229 | 4.62E-05   |
| Cellulose synthase catalytic subunit [UDP-forming]                                            | 5063.04335 | 0.65506172 | 0.09555655 | 6.85522562 | 6.36E-11   |
| Putative oxidoreductase                                                                       | 39.8524039 | 0.65449576 | 0.27052362 | 2.4193664  | 0.03481096 |
| Hypothetical Zinc-finger containing protein                                                   | 288.195776 | 0.65363306 | 0.16894003 | 3.86902422 | 0.00040199 |
| FIG00637950: hypothetical protein                                                             | 70.0278    | 0.65207485 | 0.23705634 | 2.75071678 | 0.01484586 |
| Evolved beta-D-galactosidase%2C alpha subunit                                                 | 111.139063 | 0.65190792 | 0.18715491 | 3.48325316 | 0.00158669 |
| biofilm regulator BssR                                                                        | 5844.44077 | 0.65162159 | 0.15538102 | 4.19370137 | 0.00011154 |
| FIG006303: protein yraQ                                                                       | 482.678892 | 0.65037883 | 0.13696584 | 4.74847491 | 9.97E-06   |
| Outer-membrane protein yhbX precursor                                                         | 72.1775407 | 0.64996548 | 0.16550452 | 3.9271765  | 0.00032272 |
| Glucose-1-phosphate thymidyltransferase                                                       | 16.4212502 | 0.64951415 | 0.21917815 | 2.96340741 | 0.00812775 |
| Sulfate and thiosulfate import ATP-binding protein CysA                                       | 13770.9014 | 0.64779402 | 0.10697978 | 6.05529404 | 9.64E-09   |
| Thiol:disulfide interchange protein DsbG precursor                                            | 652.103512 | 0.64731836 | 0.13548249 | 4.77787452 | 8.67E-06   |
| Electron transport complex protein RnfD                                                       | 374.604537 | 0.64573986 | 0.14910312 | 4.3308273  | 6.30E-05   |
| Putative regulator                                                                            | 86.868497  | 0.64534724 | 0.20605351 | 3.13194003 | 0.00495216 |
| Intergenic-region protein                                                                     | 57.191576  | 0.64499142 | 0.24092735 | 2.67711992 | 0.01807175 |
| FIG00638001: hypothetical protein                                                             | 65.3117575 | 0.64375942 | 0.22355011 | 2.8797097  | 0.01034121 |
| NADH pyrophosphatase                                                                          | 1220.19628 | 0.64214231 | 0.08946484 | 7.1775943  | 6.84E-12   |
| Polymyxin resistance protein ArnC%2C glycosyl transferase                                     | 2075.06535 | 0.64160611 | 0.12540785 | 5.11615575 | 1.69E-06   |
| FIG00643895: hypothetical protein                                                             | 97.2996976 | 0.63922418 | 0.17760441 | 3.59914579 | 0.0010682  |
| Uncharacterized protein ygiV                                                                  | 182.070604 | 0.63920826 | 0.18517056 | 3.45199726 | 0.00176328 |
| FIG00638983: hypothetical protein                                                             | 162.457711 | 0.63905873 | 0.16809097 | 3.80186243 | 0.00051659 |
| Transporter                                                                                   | 77.327231  | 0.63822392 | 0.2107921  | 3.02774111 | 0.00676285 |
| FIG00640398: hypothetical protein                                                             | 84.8234341 | 0.63601667 | 0.24185443 | 3.62974991 | 0.02036539 |
| Gamma-D-Glutamyl-meso-Diaminopimelate Amidase                                                 | 120.939177 | 0.63412697 | 0.16550706 | 3.83141945 | 0.00046259 |
| Putative transport protein                                                                    | 75.7281716 | 0.6328793  | 0.24395081 | 2.5942906  | 0.02236249 |
| FolM Alternative dihydrofolate reductase 1                                                    | 489.169243 | 0.63175981 | 0.10254859 | 6.16059022 | 5.18E-09   |
| Enoyl-CoA hydratase                                                                           | 674.273722 | 0.63138877 | 0.1104213  | 5.71799795 | 6.70E-08   |
| Xanthine permease                                                                             | 941.949525 | 0.63137344 | 0.14957056 | 4.22124133 | 9.99E-05   |
| 4-hydroxybenzoyl-CoA thioesterase family active site                                          | 168.969497 | 0.63048155 | 0.15100208 | 4.17531715 | 0.00011992 |
| Putative inner membrane protein                                                               | 155.060961 | 0.62973377 | 0.1561312  | 4.03336277 | 0.00021445 |
| Phage shock protein D                                                                         | 413.931387 | 0.6285401  | 0.17235552 | 3.64676507 | 0.00090387 |
| putative integral membrane protein                                                            | 674.873484 | 0.62846999 | 0.09519118 | 6.60218718 | 3.32E-10   |
| Xylose ABC transporter%2C permease protein XylH                                               | 225.90315  | 0.62842411 | 0.16022069 | 3.92224082 | 0.00032836 |
| Trans-aconitate 2-methyltransferase                                                           | 476.329247 | 0.62773368 | 0.14257927 | 4.40269947 | 4.66E-05   |
| Long-chain-fatty-acid--CoA ligase                                                             | 67.8293344 | 0.62545628 | 0.21567472 | 2.89999812 | 0.00975895 |
| FIG018329: 1-acyl-sn-glycerol-3-phosphate acyltransferase                                     | 2451.1907  | 0.62531938 | 0.12925982 | 4.83769336 | 6.53E-06   |
| Ethanolamine permease                                                                         | 98.1464896 | 0.62348684 | 0.20246908 | 3.07941755 | 0.0058027  |
| FIG00510289: hypothetical protein                                                             | 171.52264  | 0.6221403  | 0.15757987 | 3.94809505 | 0.00029935 |
| Transporter%2C putative                                                                       | 410.981311 | 0.62107586 | 0.18747228 | 3.31289431 | 0.00279847 |
| Hypothetical protein GlcG in glycolate utilization operon                                     | 330.733387 | 0.62104356 | 0.11675939 | 5.31900306 | 5.90E-07   |
| Mobile element protein                                                                        | 69.683755  | 0.62026801 | 0.20658008 | 3.00255471 | 0.00727932 |
| Uncharacterized GST-like protein yibF                                                         | 224.228639 | 0.61995761 | 0.15639088 | 3.9641546  | 0.00028148 |
| FIG00638742: hypothetical protein                                                             | 427.451223 | 0.61952205 | 0.17004758 | 3.64322778 | 0.00091573 |
| Phosphate:acyl-ACP acyltransferase PlsX                                                       | 2732.26971 | 0.61662181 | 0.10794917 | 5.71214959 | 6.92E-08   |
| Sulfate adenylyltransferase subunit 1                                                         | 17411.5435 | 0.6147731  | 0.10967162 | 5.60558041 | 1.25E-07   |
| Catalase                                                                                      | 1840.70745 | 0.6143797  | 0.14602761 | 4.20728463 | 0.00010568 |
| L-serine dehydratase 1                                                                        | 2935.26397 | 0.61384293 | 0.14501307 | 4.23301792 | 9.50E-05   |
| UDP-4-amino-4-deoxy-L-arabinose--oxoglutarate aminotransferase                                | 3890.74207 | 0.61348535 | 0.10955063 | 5.60001682 | 1.29E-07   |
| Hypothetical transcriptional regulator yidL                                                   | 290.650077 | 0.61295765 | 0.14425356 | 4.24916823 | 8.90E-05   |
| Macrolide-specific efflux protein MacA                                                        | 1070.96914 | 0.61246161 | 0.10017146 | 6.11413302 | 6.86E-09   |
| hypothetical protein                                                                          | 127.734585 | 0.61238131 | 0.1798741  | 3.40449961 | 0.00207131 |
| FIG005274: hypothetical protein                                                               | 7867.41759 | 0.61207764 | 0.06746633 | 9.0723427  | 1.93E-18   |
| FIG01069516: hypothetical protein                                                             | 1112.29418 | 0.61136722 | 0.08926727 | 6.84872781 | 6.64E-11   |
| hypothetical protein                                                                          | 728.2644   | 0.60947039 | 0.10170426 | 5.99257492 | 1.39E-08   |
| Ribosomal large subunit pseudouridine synthase C                                              | 339.46995  | 0.60739695 | 0.14509676 | 4.1861509  | 0.00011473 |
| Mobile element protein                                                                        | 43.2987537 | 0.60620274 | 0.24396664 | 2.48477714 | 0.02959902 |
| Oxidoreductase%2C aldo/keto reductase family                                                  | 5129.24488 | 0.60495492 | 0.1000036  | 6.04933126 | 9.97E-09   |
| Branched-chain amino acid transport system permease protein LivM (TC 3.A.1.4.1)               | 286.520528 | 0.60229412 | 0.13805215 | 3.4628016  | 5.51E-05   |
| A/G-specific adenine glycosylase                                                              | 519.798054 | 0.59989468 | 0.10785795 | 5.56189588 | 1.58E-07   |
| Manganese transport protein MntH                                                              | 15972.3118 | 0.59837598 | 0.09671832 | 6.18679048 | 4.43E-09   |
| Cytochrome c-type heme lyase subunit nrfE%2Cnitrite reductase complex assembly                | 94.1818349 | 0.59810345 | 0.20903105 | 2.86131386 | 0.01087715 |
| DNA-binding protein Fis                                                                       | 874.593917 | 0.5971327  | 0.13758018 | 4.34025248 | 6.07E-05   |
| Rod shape-determining protein MreC                                                            | 1387.97778 | 0.59659915 | 0.1033052  | 5.77511267 | 4.86E-08   |

|                                                                                                   |            |            |            |             |            |
|---------------------------------------------------------------------------------------------------|------------|------------|------------|-------------|------------|
| Membrane protein Yci%2C linked to IspA                                                            | 684.436813 | 0.59648962 | 0.11951313 | 4.99099668  | 3.11E-06   |
| Putative membrane protein                                                                         | 196.569734 | 0.59630448 | 0.1432863  | 4.16162944  | 0.0001269  |
| Permeases of the major facilitator superfamily                                                    | 895.121926 | 0.59444495 | 0.13862309 | 4.2882102   | 7.56E-05   |
| Periplasmic Murein Peptide-Binding Protein MppA                                                   | 2205.56006 | 0.59338344 | 0.08266163 | 1.17846298  | 6.81E-12   |
| Flavoprotein wrbA                                                                                 | 15409.6952 | 0.59191087 | 0.11281322 | 5.24682207  | 8.61E-07   |
| N-acetylmuramoyl-L-alanine amidase                                                                | 7612.11492 | 0.58983063 | 0.08240123 | 7.15803222  | 7.79E-12   |
| type 1 fimbriae anchoring protein FimD                                                            | 368.8127   | 0.58923431 | 0.20299648 | 2.90268231  | 0.00968668 |
| Inner membrane protein CreD                                                                       | 318.880916 | 0.5855283  | 0.14854539 | 3.94174673  | 0.00030664 |
| Aerobic glycerol-3-phosphate dehydrogenase                                                        | 2195.88558 | 0.58481761 | 0.20304906 | 2.8801788   | 0.01033151 |
| Biofilm PGA synthesis N-glycosyltransferase PgaC                                                  | 515.807151 | 0.58467785 | 0.15442398 | 3.78618572  | 0.0005458  |
| Protein involved in stability of MscS mechanosensitive channel                                    | 7633.96886 | 0.58418295 | 0.12592317 | 4.63920133  | 1.65E-05   |
| FIG001957: putative hydrolase                                                                     | 514.525574 | 0.58093885 | 0.11367114 | 5.1106979   | 1.73E-06   |
| type 1 fimbriae major subunit FimA                                                                | 495.131814 | 0.57793661 | 0.20734645 | 2.78729926  | 0.0133821  |
| Tricarboxylate transport protein TctB                                                             | 52.7968734 | 0.57772161 | 0.2273491  | 2.54112121  | 0.02566343 |
| ID=gene:EBG00000313228                                                                            | 64.6788675 | 0.5776521  | 0.22259717 | 2.59505584  | 0.02232719 |
| ID=gene:EBG00000313293                                                                            | 64.6788675 | 0.5776521  | 0.22259717 | 2.59505584  | 0.02232719 |
| Uncharacterized protein Yid5                                                                      | 184.706206 | 0.57302647 | 0.17192617 | 3.33297986  | 0.00261916 |
| FIG00637936: hypothetical protein                                                                 | 187.25661  | 0.57288305 | 0.19971666 | 2.86847904  | 0.01067453 |
| Nitrogen regulation protein NtrB                                                                  | 1930.2044  | 0.572613   | 0.10834716 | 5.28498378  | 7.07E-07   |
| FIG00639456: hypothetical protein                                                                 | 143.419202 | 0.57235612 | 0.15618393 | 3.66462866  | 0.00084917 |
| Gifsy-2 prophage protein                                                                          | 82.105829  | 0.57228487 | 0.23494291 | 2.4358465   | 0.03342292 |
| Pantothenate:Na+ symporter (TC 2.A.21.1.1)                                                        | 440.979193 | 0.57169888 | 0.17299238 | 3.30476331  | 0.00287161 |
| Calcium/proton antiporter                                                                         | 2004.93528 | 0.57145426 | 0.09502787 | 6.01354381  | 1.23E-08   |
| Paraquat-inducible protein A                                                                      | 881.265093 | 0.56881139 | 0.09729107 | 5.84649131  | 3.23E-08   |
| Intracellular septation protein IspA                                                              | 690.986624 | 0.56674836 | 0.09623817 | 5.88901867  | 2.53E-08   |
| HTH-type transcriptional regulator BetI                                                           | 6824.26443 | 0.5652352  | 0.09662137 | 3.850000171 | 3.17E-08   |
| Methylated-DNA--protein-cysteine methyltransferase                                                | 614.075156 | 0.56520798 | 0.10852353 | 5.20816087  | 1.05E-06   |
| CDP-diacylglycerol--glycerol-3-phosphate 3-phosphatidyltransferase                                | 48.842146  | 0.56455939 | 0.24738006 | 2.28215403  | 0.04779125 |
| Protease II                                                                                       | 1429.26837 | 0.56387521 | 0.08568655 | 6.58067329  | 3.79E-10   |
| Alkylated DNA repair protein AlkB                                                                 | 305.158698 | 0.56267788 | 0.13384991 | 4.20379718  | 0.00010714 |
| Outer membrane pore protein E precursor                                                           | 96.0298642 | 0.56228968 | 0.17885286 | 3.14386753  | 0.00477484 |
| Endoglucanase precursor                                                                           | 4271.27535 | 0.56213499 | 0.13015172 | 4.31907447  | 6.62E-05   |
| Decarboxylase family protein                                                                      | 14786.1962 | 0.56122537 | 0.1137167  | 4.93529415  | 4.09E-06   |
| Lipopolysaccharide heptosyltransferase III                                                        | 2523.48736 | 0.56080559 | 0.09803449 | 5.72049301  | 6.63E-08   |
| Cytochrome c-type heme lyase subunit nrFG%2Cnitrile reductase complex assembly                    | 62.5211457 | 0.55927536 | 0.21194078 | 2.63882846  | 0.01996887 |
| Chaperone protein HscB                                                                            | 1615.27385 | 0.55846953 | 0.08263905 | 6.75793718  | 1.21E-10   |
| Carbamoyl-phosphate synthase small chain                                                          | 8396.75452 | 0.55718439 | 0.20144802 | 2.76589652  | 0.01420966 |
| Integral membrane protein TerC                                                                    | 362.522576 | 0.55616966 | 0.17138494 | 3.24514896  | 0.00347322 |
| Ethanolamine ammonia-lyase light chain                                                            | 487.94634  | 0.5555906  | 0.12636748 | 4.39662631  | 4.77E-05   |
| FIG00638170: hypothetical protein                                                                 | 78.0847178 | 0.55361609 | 0.21872396 | 2.53111769  | 0.0263683  |
| Periplasmic protein related to spheroblast formation                                              | 1230.89486 | 0.55292013 | 0.16525191 | 3.34592272  | 0.00251449 |
| Ribulosamine/erythrulosamine 3-kinase potentially involved in protein deglycation                 | 2651.19163 | 0.55271003 | 0.11644886 | 4.74637578  | 1.01E-05   |
| Inner membrane metabolite transport protein YhjE                                                  | 1715.9981  | 0.55092817 | 0.13314336 | 4.13785694  | 0.00013984 |
| UDP-galactose:(galactosyl) LPS alpha1%2C2-galactosyltransferase WaaW                              | 1470.32315 | 0.55047759 | 0.15697063 | 3.50688261  | 0.00146917 |
| Ribosomal protein S12p Asp88 (E. coli) methylthiotransferase                                      | 875.074571 | 0.54969482 | 0.08842991 | 6.21616378  | 3.69E-09   |
| ADA regulatory protein / Methylated-DNA--protein-cysteine methyltransferase                       | 1150.10696 | 0.54899813 | 0.11910099 | 4.60951793  | 1.89E-05   |
| Menaquinone-specific isochorismate synthase                                                       | 1240.55402 | 0.54755384 | 0.09672116 | 5.66115894  | 9.23E-08   |
| Preprotein translocase subunit SecG (TC 3.A.5.1.1)                                                | 3377.45598 | 0.54703717 | 0.12243201 | 4.46808936  | 3.54E-05   |
| TsaC protein (YrdC domain) required for threonylcarbamoyladenosine t(6)A37 modification in tRNA   | 2415.72894 | 0.54660005 | 0.10651065 | 5.13188144  | 1.56E-06   |
| Carbon-nitrogen hydrolase                                                                         | 1116.52531 | 0.54583881 | 0.15395823 | 3.54536938  | 0.00128988 |
| Putative inner membrane protein                                                                   | 106.77639  | 0.54564625 | 0.23975913 | 2.27581012  | 0.04842734 |
| Polymyxin resistance protein PmrG%3B Ais protein                                                  | 162.166809 | 0.54471808 | 0.17539189 | 3.10571981  | 0.00536132 |
| Multidrug resistance protein A                                                                    | 267.601088 | 0.54459008 | 0.19812811 | 2.74867653  | 0.0149307  |
| FIG00638032: hypothetical protein                                                                 | 124.268494 | 0.54400327 | 0.21090115 | 2.57942296  | 0.02324756 |
| Proline/sodium symporter PutP (TC 2.A.21.2.1) @ Propionate/sodium symporter                       | 2281.23271 | 0.54376397 | 0.14425504 | 3.76946246  | 0.0005802  |
| Inner membrane protein YgiK                                                                       | 602.528919 | 0.54323296 | 0.12275034 | 4.42551088  | 4.25E-05   |
| Putative membrane protein                                                                         | 529.74236  | 0.54302711 | 0.13563094 | 4.00371125  | 0.00024158 |
| YfdE protein                                                                                      | 100.361574 | 0.54289814 | 0.22692731 | 2.39238787  | 0.03693698 |
| Dipeptide transport ATP-binding protein DppD (TC 3.A.1.5.2)                                       | 1767.12337 | 0.54275899 | 0.12886958 | 4.21169201  | 0.00010391 |
| Transcriptional regulator%2C AraC family                                                          | 211.110084 | 0.54250559 | 0.141264   | 3.84036696  | 0.00044746 |
| hypothetical protein                                                                              | 768.152793 | 0.5420157  | 0.14247914 | 3.80417569  | 0.00051304 |
| Mobile element protein                                                                            | 409.103199 | 0.54141625 | 0.14493504 | 3.7355788   | 0.00065633 |
| CDP-diacylglycerol pyrophosphatase                                                                | 138.294107 | 0.54112482 | 0.1524462  | 3.54961178  | 0.00127193 |
| Alcohol dehydrogenase                                                                             | 1881.30561 | 0.54040174 | 0.11646602 | 4.63999479  | 1.64E-05   |
| Phenylalanyl-tRNA synthetase beta chain                                                           | 21441.0194 | 0.540293   | 0.07273491 | 7.42824909  | 1.13E-12   |
| FIG00639775: hypothetical protein                                                                 | 231.706252 | 0.53999799 | 0.15969645 | 3.38140253  | 0.00222996 |
| Putative inner membrane protein                                                                   | 202.714777 | 0.53995503 | 0.16454144 | 3.28157476  | 0.00309491 |
| probable lipoprotein                                                                              | 4590.58936 | 0.53984    | 0.10255582 | 5.2386485   | 7.89E-07   |
| Pyruvate-flavodoxin oxidoreductase                                                                | 3183.80319 | 0.53923692 | 0.09580842 | 6.62828338  | 1.10E-07   |
| L-Proline/Glycine betaine transporter ProP                                                        | 34398.0136 | 0.53922905 | 0.09383643 | 5.74647871  | 5.73E-08   |
| Tetraacyldisaccharide 4'-kinase                                                                   | 1283.49227 | 0.53846615 | 0.11718571 | 4.59498122  | 2.01E-05   |
| ATP-dependent protease La                                                                         | 2843.04998 | 0.53802743 | 0.06838311 | 7.8678408   | 4.27E-14   |
| Glycine cleavage system H protein                                                                 | 1287.57476 | 0.53791228 | 0.13639518 | 3.94377776  | 0.0003043  |
| Cellulose synthase%2C putative                                                                    | 2730.16904 | 0.53658651 | 0.10427626 | 5.14581649  | 1.45E-06   |
| Mobile element protein                                                                            | 109.609236 | 0.5351957  | 0.17622867 | 3.03693895  | 0.00659673 |
| Mobile element protein                                                                            | 305.135327 | 0.53495729 | 0.13080628 | 4.08969116  | 0.00017015 |
| Threonine dehydratase%2C catabolic                                                                | 173.713357 | 0.53422928 | 0.15701346 | 3.40244258  | 0.00208437 |
| AmpG permease                                                                                     | 732.618765 | 0.53362957 | 0.0904649  | 5.89874719  | 2.40E-08   |
| Putative amino acid permease                                                                      | 323.750295 | 0.53055956 | 0.15677403 | 3.38423109  | 0.00221195 |
| Ribonucleotide reductase of class II (aerobic)%2Cbeta subunit                                     | 8378.6323  | 0.53023829 | 0.11759191 | 4.50913931  | 2.97E-05   |
| FIG002082: Protein SirB2                                                                          | 228.725161 | 0.52973018 | 0.1633466  | 3.24298261  | 0.00349319 |
| Putative inner membrane protein                                                                   | 114.602517 | 0.52918526 | 0.19259132 | 2.74771084  | 0.01496685 |
| ID=gene:EBG00000313275                                                                            | 55.998954  | 0.52829649 | 0.22268951 | 2.37234562  | 0.03864494 |
| ID=gene:EBG00000313277                                                                            | 55.998954  | 0.52829649 | 0.22268951 | 2.37234562  | 0.03864494 |
| ID=gene:EBG00000313278                                                                            | 55.998954  | 0.52829649 | 0.22268951 | 2.37234562  | 0.03864494 |
| ID=gene:EBG00000313281                                                                            | 55.998954  | 0.52829649 | 0.22268951 | 2.37234562  | 0.03864494 |
| ID=gene:EBG00000313282                                                                            | 55.998954  | 0.52829649 | 0.22268951 | 2.37234562  | 0.03864494 |
| ID=gene:EBG00000313305                                                                            | 55.998954  | 0.52829649 | 0.22268951 | 2.37234562  | 0.03864494 |
| Cys regulon transcriptional activator CysB                                                        | 5142.57405 | 0.52802129 | 0.08053063 | 6.55677563  | 4.42E-10   |
| Potassium uptake protein TrkH                                                                     | 1596.10722 | 0.52689911 | 0.0880544  | 5.98379095  | 1.46E-08   |
| FIG00637861: hypothetical protein                                                                 | 445.197269 | 0.52538741 | 0.11224545 | 4.68070102  | 1.37E-05   |
| Phosphatidylglycerophosphatase B                                                                  | 753.499941 | 0.52509881 | 0.1156732  | 4.53950283  | 2.59E-05   |
| Putative deoxyribonuclease YcfH                                                                   | 1254.50986 | 0.52449012 | 0.09173738 | 5.71729984  | 6.72E-08   |
| Invasin                                                                                           | 463.861231 | 0.52421167 | 0.11875084 | 4.41438276  | 4.45E-05   |
| FIG00638364: hypothetical protein                                                                 | 162.819221 | 0.52359589 | 0.14510532 | 3.60838527  | 0.00103527 |
| COG2879%2C Hypothetical small protein yjiX                                                        | 296.371175 | 0.52347773 | 0.17722816 | 2.95369386  | 0.00835496 |
| Multidrug transporter MdtD                                                                        | 235.862141 | 0.52318977 | 0.15031264 | 3.48067722  | 0.00159986 |
| Cytochrome c-type protein NrfB precursor                                                          | 91.2706396 | 0.5226926  | 0.20541587 | 2.54455799  | 0.02542474 |
| Ribosomal large subunit pseudouridine synthase B                                                  | 1373.49064 | 0.52255705 | 0.09103094 | 5.74043362  | 5.93E-08   |
| High-affinity leucine-specific transport system%2Cperiplasmic binding protein LivK (TC 3.A.1.4.1) | 460.435161 | 0.52095647 | 0.10533998 | 4.94547701  | 3.89E-06   |
| Mg(2+) transport ATPase%2C P-type                                                                 | 6120.75734 | 0.52008895 | 0.11814346 | 4.40218131  | 4.67E-05   |
| Mobile element protein                                                                            | 141.621711 | 0.51973936 | 0.17228288 | 3.01677901  | 0.00698242 |
| FIG01219827: hypothetical protein                                                                 | 246.954162 | 0.51965015 | 0.19743153 | 2.63205246  | 0.0028921  |
| lipid A biosynthesis lauroyl acyltransferase                                                      | 374.64369  | 0.51946072 | 0.13750235 | 3.77783151  | 0.00056232 |
| Possible exported protein                                                                         | 139.441458 | 0.51842374 | 0.15612032 | 3.32066802  | 0.00272867 |
| FIG00895798: hypothetical protein                                                                 | 7603.64904 | 0.51773466 | 0.12489531 | 4.14534903  | 0.00013569 |
| Peptide transport system permease protein SapC                                                    | 919.9021   | 0.51755161 | 0.12253677 | 4.22364347  | 9.89E-05   |

|                                                                                                                                              |            |            |            |            |            |
|----------------------------------------------------------------------------------------------------------------------------------------------|------------|------------|------------|------------|------------|
| Maltose operon periplasmic protein MalM                                                                                                      | 276.72118  | 0.5174287  | 0.12270516 | 4.21684562 | 0.00010165 |
| Paraquat-inducible protein A                                                                                                                 | 588.515896 | 0.517082   | 0.09942455 | 5.20074781 | 1.09E-06   |
| Inner membrane protein translocase component YidC%2C long form                                                                               | 5732.02815 | 0.51671323 | 0.10483302 | 4.92891695 | 4.21E-06   |
| SAM-dependent methyltransferase                                                                                                              | 8625.96923 | 0.51545467 | 0.10114997 | 5.09594491 | 1.86E-06   |
| Ferric enterobactin uptake protein FepE                                                                                                      | 8626.06808 | 0.51445664 | 0.06754249 | 7.61678548 | 2.85E-13   |
| Putative protease ydgD                                                                                                                       | 2517.90637 | 0.51432345 | 0.07799952 | 6.59393114 | 3.51E-10   |
| Potassium channel protein                                                                                                                    | 1238.14701 | 0.5139176  | 0.11643619 | 4.41372753 | 4.46E-05   |
| Lipid A export ATP-binding/permease protein MsbA                                                                                             | 2586.20428 | 0.51379505 | 0.0841482  | 6.10583538 | 7.19E-09   |
| Alkaline phosphatase                                                                                                                         | 2289.4492  | 0.51275664 | 0.10447567 | 4.90790482 | 4.65E-06   |
| 3-oxoacyl-[ACP] synthase                                                                                                                     | 3614.12742 | 0.51195231 | 0.09011194 | 5.68129297 | 8.23E-08   |
| Putative HTH-type transcriptional regulator ycgE                                                                                             | 1787.62487 | 0.51178897 | 0.08707339 | 5.87767343 | 2.70E-08   |
| Acyl-CoA dehydrogenase                                                                                                                       | 635.964218 | 0.51105475 | 0.11103136 | 4.60279653 | 1.94E-05   |
| Translation elongation factor P Lys34:lysine transferase                                                                                     | 586.148133 | 0.51104942 | 0.11338288 | 4.50728911 | 2.99E-05   |
| 6-phospho-beta-glucosidase                                                                                                                   | 408.688589 | 0.51074569 | 0.12539863 | 4.0729765  | 0.00018254 |
| FIG00638813: hypothetical protein                                                                                                            | 369.080547 | 0.51036656 | 0.15689414 | 3.25293585 | 0.00338367 |
| IgaA: a membrane protein that prevents overactivation of the Rcs regulatory system                                                           | 2006.66484 | 0.5102431  | 0.11474709 | 4.44667588 | 3.89E-05   |
| Xylose isomerase                                                                                                                             | 412.573908 | 0.50837895 | 0.13318996 | 3.81694659 | 0.00048833 |
| Endo-1%2C4-beta-xylanase A precursor                                                                                                         | 213.827773 | 0.50791048 | 0.17344714 | 2.92833005 | 0.00901716 |
| Lipoprotein releasing system transmembrane protein LolE                                                                                      | 1944.41725 | 0.50480185 | 0.11498303 | 4.39022937 | 4.89E-05   |
| FIG004453: protein YceG like                                                                                                                 | 1026.72282 | 0.50284684 | 0.11556902 | 4.35105224 | 5.79E-05   |
| Acyl-CoA dehydrogenase                                                                                                                       | 2909.28181 | 0.50171815 | 0.12314717 | 4.07413447 | 0.00018178 |
| Invasin                                                                                                                                      | 77.6915494 | 0.50139058 | 0.19835358 | 2.52776173 | 0.02659559 |
| 2-methylcitrate dehydratase                                                                                                                  | 152.456117 | 0.50109743 | 0.15948438 | 3.14198433 | 0.00480275 |
| Putative inner membrane protein                                                                                                              | 508.796476 | 0.49815767 | 0.1085005  | 4.59129399 | 2.05E-05   |
| Ethanolamine utilization polyhedral-body-like protein EutK                                                                                   | 365.431294 | 0.49757271 | 0.14199045 | 3.50426876 | 0.00148062 |
| cysteine synthase B                                                                                                                          | 3654.98936 | 0.49530618 | 0.11429845 | 4.33344598 | 6.25E-05   |
| Fumarate hydratase class 1%2C aerobic                                                                                                        | 292.240011 | 0.49511084 | 0.13760441 | 3.59807379 | 0.00107186 |
| Inner membrane protein YfeZ                                                                                                                  | 126.996348 | 0.49485542 | 0.15531411 | 3.18615891 | 0.00417694 |
| Putative outer membrane protein                                                                                                              | 651.23666  | 0.49468427 | 0.15807939 | 3.12934076 | 0.00498436 |
| Hybrid sensory histidine kinase in two-component regulatory system with EvgA                                                                 | 1562.1744  | 0.49464847 | 0.15808201 | 3.12906235 | 0.00498589 |
| Adenylylsulfate kinase                                                                                                                       | 2515.731   | 0.4942433  | 0.13615284 | 3.63006241 | 0.0009589  |
| Na+/H+ antiporter NhaB                                                                                                                       | 2575.11234 | 0.49131863 | 0.09991921 | 4.91715899 | 4.45E-06   |
| Phosphate transport system permease protein PstC (TC 3.A.1.7.1)                                                                              | 951.112197 | 0.49045934 | 0.11090976 | 4.42214755 | 4.31E-05   |
| Inner membrane protein YfiN                                                                                                                  | 1133.89017 | 0.48971007 | 0.1153431  | 4.2456817  | 9.02E-05   |
| 3-deoxy-D-manno-oculosonic-acid transferase                                                                                                  | 1007.98742 | 0.48859636 | 0.09714245 | 5.02968935 | 2.57E-06   |
| FIG00638953: hypothetical protein                                                                                                            | 851.466849 | 0.48822748 | 0.16052522 | 3.00414377 | 0.00651034 |
| Leucine-responsive regulatory protein%2C regulator for leucine (or lrp) regulon and high-affinity branched-chain amino acid transport system | 19166.9838 | 0.48677864 | 0.11406341 | 4.26761425 | 8.23E-05   |
| FIG003145: Surface protein                                                                                                                   | 397.073211 | 0.4866947  | 0.13860592 | 3.51135577 | 0.00144764 |
| Xanthosine permease                                                                                                                          | 92.3862438 | 0.48665787 | 0.19424263 | 2.50541223 | 0.0280687  |
| Allophanate hydrolase 2 subunit 2                                                                                                            | 12046.816  | 0.48606528 | 0.11663117 | 4.16754166 | 0.00012387 |
| Undecaprenyl-phosphate N-acetylglucosaminyl 1-phosphate transferase                                                                          | 2130.47444 | 0.48604282 | 0.09877763 | 4.92064184 | 4.38E-06   |
| ADP compounds hydrolase NudE                                                                                                                 | 1168.95521 | 0.48468019 | 0.13809458 | 3.50976971 | 0.00145553 |
| Sialic acid utilization regulator%2C RpiR family                                                                                             | 321.460478 | 0.48303262 | 0.12543861 | 3.85074897 | 0.00043087 |
| HTH-type transcriptional regulator prsX                                                                                                      | 452.860493 | 0.48290438 | 0.12138663 | 3.97823383 | 0.00026705 |
| Protein SseB                                                                                                                                 | 2097.62039 | 0.48284496 | 0.11968292 | 4.03436807 | 0.00021371 |
| Paraquat-inducible protein B                                                                                                                 | 1815.14538 | 0.48253988 | 0.11260032 | 4.28542171 | 7.64E-05   |
| Phage shock protein B                                                                                                                        | 881.995    | 0.48243964 | 0.14429316 | 3.34346845 | 0.00253191 |
| Inner membrane protein YihY%2C formerly thought to be RNase BN                                                                               | 1666.09033 | 0.48053283 | 0.08174607 | 5.87835962 | 2.69E-08   |
| Inner membrane thiol:disulfide oxidoreductase%2CDsbB-like                                                                                    | 361.161413 | 0.47935144 | 0.13517978 | 3.54602915 | 0.00128755 |
| Transglycosylase%2C Slt family                                                                                                               | 107.42815  | 0.4793395  | 0.16578718 | 2.89129404 | 0.01001153 |
| transport%3B Transport of small molecules: Cations                                                                                           | 2878.28943 | 0.47768337 | 0.08696403 | 5.49288451 | 2.29E-07   |
| Ribulose-5-phosphate 4-epimerase and related epimerases and aldolases                                                                        | 133.63633  | 0.4765253  | 0.18145415 | 2.62614722 | 0.02056151 |
| Sensor histidine protein kinase UhpB%2Cglucose-6-phosphate specific                                                                          | 426.871697 | 0.47636077 | 0.13222981 | 3.60252176 | 0.00105517 |
| Shikimate 5-dehydrogenase I alpha                                                                                                            | 2900.59098 | 0.47628058 | 0.10607311 | 4.49011595 | 3.24E-05   |
| Protease II                                                                                                                                  | 240.570438 | 0.47531806 | 0.15203358 | 3.12640178 | 0.00502519 |
| DNA primase                                                                                                                                  | 4019.94743 | 0.47482115 | 0.09935042 | 4.77925684 | 8.62E-06   |
| Carbamoyl-phosphate synthase large chain                                                                                                     | 43361.5612 | 0.47263355 | 0.16729836 | 2.82509372 | 0.01206795 |
| Alpha-ketoglutarate-dependent taurine dioxigenase                                                                                            | 730.101446 | 0.47202012 | 0.14191221 | 3.32614166 | 0.00268081 |
| Cysteine desulfurase                                                                                                                         | 15936.398  | 0.47198444 | 0.06262293 | 7.53692724 | 5.15E-13   |
| Phosphate transport system permease protein PstA (TC 3.A.1.7.1)                                                                              | 882.055143 | 0.47087786 | 0.11088347 | 4.24660084 | 8.99E-05   |
| Nicotinamide-nucleotide adenylyltransferase%2C NadR family                                                                                   | 185.727982 | 0.47004097 | 0.17107855 | 2.74751545 | 0.01496788 |
| FIG00638035: hypothetical protein                                                                                                            | 1375.57139 | 0.46989156 | 0.11325792 | 4.14886284 | 0.00013374 |
| AidA-I adhesin-like protein                                                                                                                  | 347.868463 | 0.46887057 | 0.1420183  | 3.30148006 | 0.0028963  |
| FIG006163: hypothetical protein                                                                                                              | 71.6377145 | 0.46591572 | 0.19462294 | 2.39394044 | 0.03683254 |
| Putative heat shock protein YegD                                                                                                             | 371.521165 | 0.46532071 | 0.13285472 | 3.50247775 | 0.00148858 |
| Outer membrane porin protein NmpC precursor                                                                                                  | 138.034699 | 0.46254301 | 0.16535595 | 2.79725647 | 0.01302506 |
| Cystine ABC transporter%2C periplasmic cystine-binding protein FliY                                                                          | 10285.8307 | 0.46203628 | 0.13227536 | 3.49298814 | 0.0015362  |
| ATP-dependent RNA helicase RhlE                                                                                                              | 2396.03327 | 0.4619712  | 0.11806804 | 3.91275422 | 0.00034073 |
| LysR family transcriptional regulator YhjC                                                                                                   | 276.387438 | 0.46116376 | 0.13909041 | 3.31556825 | 0.00277361 |
| Glutamate synthase [NADPH] small chain                                                                                                       | 478.429814 | 0.4603632  | 0.1114606  | 4.13027742 | 0.00014393 |
| Arylesterase precursor                                                                                                                       | 772.941877 | 0.46031714 | 0.10270812 | 4.48179869 | 3.34E-05   |
| Glucuronide transport facilitator UidC                                                                                                       | 162.072301 | 0.45993733 | 0.16942325 | 2.71472379 | 0.01636143 |
| PTS system%2C galactosamine-specific IID component                                                                                           | 131.859332 | 0.45963057 | 0.1826936  | 2.51585476 | 0.02735046 |
| Cnu protein                                                                                                                                  | 145.372996 | 0.45831344 | 0.166835   | 2.74710602 | 0.01497868 |
| Putative NAGC-like transcriptional regulator                                                                                                 | 232.234188 | 0.45810398 | 0.13544212 | 3.38228605 | 0.00222469 |
| Multiple antibiotic resistance protein MarC                                                                                                  | 230.268556 | 0.45772809 | 0.14497796 | 3.15722545 | 0.00458082 |
| Transcription repressor of multidrug efflux pump acrAB operon%2C TetR (AcrR) family                                                          | 149.326216 | 0.45759433 | 0.15001462 | 3.05033154 | 0.00634284 |
| Maltoporin (maltose/maltodextrin high-affinity receptor%2C phage lambda receptor protein)                                                    | 121.213148 | 0.45713854 | 0.17861996 | 2.55928034 | 0.02448103 |
| D-alanyl-D-alanine carboxypeptidase                                                                                                          | 7516.45473 | 0.45712505 | 0.09208875 | 4.96396202 | 3.55E-06   |
| Galactitol-D-phosphate 5-dehydrogenase                                                                                                       | 137.73793  | 0.45674539 | 0.17607716 | 2.59400702 | 0.02236249 |
| Multiple antibiotic resistance protein MarR                                                                                                  | 84.2102434 | 0.45581845 | 0.19816642 | 2.30018009 | 0.04587213 |
| Putative lipase in cluster with Phosphatidate cytidyllyltransferase                                                                          | 231.037611 | 0.45544546 | 0.12882954 | 3.53525641 | 0.00133194 |
| Oligopeptide transport system permease protein OppB (TC 3.A.1.5.1)                                                                           | 3298.5274  | 0.45538981 | 0.10144369 | 4.48908952 | 3.24E-05   |
| Methyl-directed repair DNA adenine methylase                                                                                                 | 1201.75604 | 0.45524165 | 0.1338539  | 3.40103386 | 0.00209222 |
| Acyl-CoA thioesterase YciA%2C involved in membrane biogenesis                                                                                | 201.994361 | 0.45474003 | 0.16120105 | 2.82094962 | 0.01219496 |
| Electron transport complex protein RnfG                                                                                                      | 411.851673 | 0.45363093 | 0.12692201 | 3.57409202 | 0.00116516 |
| type 1 fimbriae adaptor subunit FimG                                                                                                         | 490.494259 | 0.45334894 | 0.19913977 | 2.27653649 | 0.04836359 |
| Phosphoenolpyruvate synthase                                                                                                                 | 28496.6618 | 0.45297761 | 0.12971784 | 3.49202243 | 0.00154072 |
| ABC transport system%2C permease component YbhR                                                                                              | 5537.31707 | 0.45244947 | 0.1233878  | 3.66689    | 0.00084292 |
| Putative TEGT family carrier/transport protein                                                                                               | 5004.32113 | 0.4517851  | 0.08175771 | 5.52590188 | 1.91E-07   |
| Uncharacterized protein ImpJ/VasE                                                                                                            | 98.635274  | 0.44941623 | 0.1789796  | 2.51099129 | 0.02767627 |
| Cation transport protein chnC                                                                                                                | 3578.74871 | 0.448728   | 0.11288402 | 3.9751243  | 0.00027012 |
| Allantoin permease                                                                                                                           | 144.612173 | 0.44820898 | 0.18318926 | 2.44669903 | 0.03254169 |
| Dipeptide transport system permease protein DppC (TC 3.A.1.5.2)                                                                              | 1982.67332 | 0.44814211 | 0.11397695 | 3.93186629 | 0.000318   |
| Large-conductance mechanosensitive channel                                                                                                   | 6984.19408 | 0.44647495 | 0.09901705 | 4.50907165 | 2.97E-05   |
| tRNA (guanine46-N7-)-methyltransferase                                                                                                       | 825.636562 | 0.44625189 | 0.09556273 | 4.66972753 | 1.44E-05   |
| 4'-phosphopantetheinyl transferase                                                                                                           | 234.508701 | 0.4459405  | 0.13646405 | 3.26782413 | 0.00323492 |
| Preprotein translocase subunit SecE (TC 3.A.5.1.1)                                                                                           | 3615.82799 | 0.4446527  | 0.07605547 | 5.84642627 | 3.23E-08   |
| Phosphocarrier protein%2C nitrogen regulation associated                                                                                     | 473.044324 | 0.44460846 | 0.13338598 | 3.33324744 | 0.00261833 |
| Chaperone protein HscA                                                                                                                       | 7869.9245  | 0.44439521 | 0.08823438 | 5.03653135 | 2.49E-06   |
| Phage shock protein C                                                                                                                        | 707.040928 | 0.44402707 | 0.13823197 | 3.21218803 | 0.00385886 |
| Putative uncharacterized protein YrbL                                                                                                        | 2814.31172 | 0.44372802 | 0.13182979 | 3.36591623 | 0.00234762 |
| Amnodoxychorismate lyase                                                                                                                     | 1061.92997 | 0.44261022 | 0.13882937 | 3.18815989 | 0.00415322 |
| Probable transport protein YifK                                                                                                              | 587.816977 | 0.44215346 | 0.13660102 | 3.23682401 | 0.00356278 |
| Ribonucleotide reductase of class Ib (aerobic)%2C alpha subunit                                                                              | 14947.3707 | 0.44132565 | 0.11350689 | 3.88809557 | 0.00037431 |
| TrkA%2C Potassium channel-family protein                                                                                                     | 3892.30066 | 0.44127978 | 0.1035857  | 4.26004534 | 8.50E-05   |
| FIG034389 (not subsystem-based): hypothetical protein                                                                                        | 529.688396 | 0.44101349 | 0.10539863 | 4.18424324 | 0.00011556 |

|                                                                                                  |            |            |            |            |            |
|--------------------------------------------------------------------------------------------------|------------|------------|------------|------------|------------|
| Putative membrane protein                                                                        | 1365.61638 | 0.44098697 | 0.08654335 | 5.09556165 | 1.86E-06   |
| Ethanolamine utilization polyhedral-body-like protein EutL                                       | 403.346344 | 0.43859349 | 0.15202503 | 2.88500832 | 0.01019113 |
| Iron-sulfur cluster assembly scaffold protein IscU                                               | 4524.84253 | 0.43614634 | 0.1174385  | 3.71382761 | 0.00071016 |
| LSU ribosomal protein L34p                                                                       | 249.527724 | 0.43582788 | 0.19090562 | 2.28294944 | 0.0477213  |
| Phosphate transport ATP-binding protein PstB (TC 3.A.1.7.1)                                      | 1168.22539 | 0.43541131 | 0.12146725 | 3.58459846 | 0.00112398 |
| Cold-shock DEAD-box protein A                                                                    | 21096.6983 | 0.43531935 | 0.14515236 | 2.99905112 | 0.00734205 |
| hypothetical protein                                                                             | 729.216901 | 0.43505502 | 0.16229622 | 2.68062319 | 0.01793387 |
| IS1 ORF1                                                                                         | 95.7746149 | 0.43444221 | 0.18474704 | 2.35155169 | 0.04068419 |
| Uncharacterized protein YfiR precursor                                                           | 970.699577 | 0.43433397 | 0.13541718 | 3.2073771  | 0.00391671 |
| Putative preQ0 transporter                                                                       | 232.090024 | 0.43350158 | 0.17382067 | 2.49395871 | 0.02888614 |
| Putative isomerase                                                                               | 242.408002 | 0.43258135 | 0.15510691 | 2.78892374 | 0.01332935 |
| Biofilm PGA synthesis deacetylase PgaB                                                           | 259.38027  | 0.4325721  | 0.14411743 | 3.00152515 | 0.00729559 |
| Transcriptional activator of cad operon                                                          | 975.68908  | 0.43178513 | 0.10514394 | 4.10660975 | 0.00015869 |
| Putative DMT superfamily metabolite efflux protein precursor                                     | 143.971335 | 0.43173154 | 0.1827048  | 2.36300059 | 0.03953982 |
| D-mannonate oxidoreductase                                                                       | 642.855134 | 0.43150492 | 0.12337163 | 3.49760244 | 0.00151295 |
| UDP-glucose dehydrogenase                                                                        | 720.225155 | 0.43145736 | 0.1215903  | 3.5484522  | 0.00127665 |
| Free methionine (R)-sulfoxide reductase%2C contains GAF domain                                   | 1986.43204 | 0.43114859 | 0.08477535 | 5.08577806 | 1.95E-06   |
| 880.204975 Putrescine ABC transporter permease component potC (TC_3.A.1.11.1)                    | 480.204975 | 0.43061017 | 0.1471044  | 2.92724195 | 0.00904371 |
| Putative NAD(P)-dependent oxidoreductase EC-YbbO                                                 | 2215.66277 | 0.43010922 | 0.10265446 | 4.18987371 | 0.00011315 |
| Transcriptional regulator%2C TetR family                                                         | 148.780983 | 0.42952935 | 0.17707019 | 2.42575753 | 0.03426884 |
| L-sorbose 1-phosphate reductase                                                                  | 156.938246 | 0.42804972 | 0.17132767 | 2.49842721 | 0.02855211 |
| Histidine ABC transporter%2C histidine-binding periplasmic protein precursor HisJ (TC 3.A.1.3.1) | 10862.4659 | 0.42559819 | 0.15777596 | 2.69748448 | 0.01713499 |
| FIG146278: Maf/YceF/YhdE family protein                                                          | 4413.77194 | 0.42515303 | 0.08204561 | 5.18191054 | 1.21E-06   |
| Cyclic di-GMP binding protein precursor                                                          | 12879.1545 | 0.42506274 | 0.10502944 | 4.04708175 | 0.0002028  |
| Protease III precursor                                                                           | 2726.76895 | 0.42505543 | 0.07668169 | 5.54311531 | 1.74E-07   |
| CFA/I fimbrial subunit C usher protein                                                           | 3049.69958 | 0.42460526 | 0.11873081 | 3.576201   | 0.00115662 |
| Putative iron compound-binding protein of ABC transporter family                                 | 2079.75127 | 0.42392593 | 0.14724335 | 2.8790838  | 0.01035607 |
| Glutathione ABC transporter ATP-binding protein                                                  | 11031.5032 | 0.42354324 | 0.11178652 | 3.78885777 | 0.00054037 |
| FIG00639146: hypothetical protein                                                                | 624.933986 | 0.42319026 | 0.16948028 | 2.4969882  | 0.02865438 |
| Branched-chain amino acid transport ATP-binding protein LivF (TC 3.A.1.4.1)                      | 350.665022 | 0.4223939  | 0.13927054 | 3.03290211 | 0.00667005 |
| FIG00637979: hypothetical protein                                                                | 834.631242 | 0.42219403 | 0.08738616 | 4.83136054 | 6.71E-06   |
| Arabinose-proton symporter                                                                       | 2688.3959  | 0.42142959 | 0.08285482 | 5.08636167 | 1.94E-06   |
| FIG00641944: hypothetical protein                                                                | 370.612049 | 0.42111443 | 0.15775079 | 2.66949177 | 0.01844948 |
| Protein yhK                                                                                      | 1452.45516 | 0.42078331 | 0.07904731 | 3.52318343 | 5.77E-07   |
| Methionine ABC transporter substrate-binding protein                                             | 7461.53252 | 0.42062444 | 0.13865136 | 3.03368402 | 0.00665667 |
| SanA protein                                                                                     | 167.14304  | 0.42013883 | 0.16064957 | 2.61525035 | 0.02117599 |
| L-xylulose/3-keto-L-gulonate kinase                                                              | 102.918056 | 0.41881424 | 0.17131615 | 2.44468632 | 0.03270824 |
| Bacterioferritin                                                                                 | 3119.97351 | 0.41829799 | 0.09756242 | 4.28749086 | 7.58E-05   |
| Hypothetical MFS-type transporter protein YcaD                                                   | 3644.14215 | 0.41743918 | 0.1634691  | 2.55362753 | 0.02483303 |
| Uncharacterized ABC transporter%2C periplasmic component YrbD                                    | 839.897096 | 0.41731714 | 0.08857573 | 4.71141628 | 1.19E-05   |
| Phosphoenolpyruvate-dihydroxyacetone phosphotransferase operon regulatory protein DhaR           | 992.130833 | 0.41652899 | 0.1180106  | 3.72562646 | 0.00068126 |
| UDP-glucose:(heptosyl) LPS alpha1%2C3-glucosyltransferase WaaG                                   | 2963.30263 | 0.41436726 | 0.11473801 | 3.61142089 | 0.00102541 |
| Low-affinity inorganic phosphate transporter                                                     | 163.481685 | 0.41290633 | 0.1763883  | 2.38049412 | 0.0418067  |
| FIG0732392: hypothetical protein                                                                 | 1592.14392 | 0.41275359 | 0.16136372 | 2.55790827 | 0.02456571 |
| Tail-specific protease precursor                                                                 | 9770.19092 | 0.4126295  | 0.11670479 | 3.53566889 | 0.00133078 |
| Regulatory protein SoxS                                                                          | 1227.05281 | 0.41249446 | 0.14299099 | 2.88475839 | 0.01019362 |
| Ribosomal RNA large subunit methyltransferase N                                                  | 1942.55044 | 0.41238333 | 0.11480446 | 3.59204972 | 0.0010954  |
| Ribosomal large subunit pseudouridine synthase F                                                 | 333.236832 | 0.41225611 | 0.128852   | 3.19945458 | 0.00401356 |
| Putrescine transport ATP-binding protein PotA (TC 3.A.1.11.1)                                    | 1731.82739 | 0.41180337 | 0.08533458 | 4.82575004 | 6.89E-06   |
| LysR family transcriptional regulator YneJ                                                       | 178.223805 | 0.41139187 | 0.14754431 | 2.78825984 | 0.01334959 |
| Ferrichrome-iron receptor                                                                        | 4299.25444 | 0.41092    | 0.12778922 | 3.21560764 | 0.0038179  |
| O-antigen ligase                                                                                 | 1266.19196 | 0.41087744 | 0.12047475 | 3.41048588 | 0.00203443 |
| Uncharacterized protein YrbK clustered with lipopolysaccharide transporters                      | 2139.30293 | 0.41015459 | 0.09225422 | 4.44591697 | 3.90E-05   |
| DNA topoisomerase I                                                                              | 7923.49552 | 0.40998075 | 0.08023796 | 5.10956097 | 1.74E-06   |
| predicted GTPase                                                                                 | 4367.16805 | 0.40973348 | 0.10016169 | 4.09072061 | 0.00016954 |
| YihE protein%2C a ser/thr kinase implicated in LPS synthesis and Cpx signalling                  | 1438.82896 | 0.40951757 | 0.08823302 | 4.64131898 | 1.63E-05   |
| Putative enzyme                                                                                  | 294.282544 | 0.40926727 | 0.12467662 | 3.28263036 | 0.0030853  |
| Shikimate kinase I                                                                               | 4671.4001  | 0.40875748 | 0.10480851 | 3.90004098 | 0.00035828 |
| Iron binding protein IscA for iron-sulfur cluster assembly                                       | 7073.36196 | 0.40733222 | 0.06839918 | 5.95522079 | 1.73E-08   |
| Polymyxin resistance protein PmrL%2C sucrose-6 phosphate hydrolase                               | 254.996202 | 0.40626889 | 0.16954182 | 3.29627531 | 0.03665008 |
| Dienelactone hydrolase family                                                                    | 427.598695 | 0.40577723 | 0.15494405 | 2.61886292 | 0.02098466 |
| Multidrug transporter MdtB                                                                       | 600.6299   | 0.40531049 | 0.16080372 | 2.52052942 | 0.0270425  |
| FIG00948312: hypothetical protein                                                                | 2364.01572 | 0.40522935 | 0.12801159 | 3.16556758 | 0.00446666 |
| Transcriptional activator RfaH                                                                   | 254.483109 | 0.40493915 | 0.15728539 | 2.57455037 | 0.02354252 |
| Syd protein                                                                                      | 335.391457 | 0.40472928 | 0.11066796 | 3.65714958 | 0.00087243 |
| Inner membrane protein YrbG%2C predicted calcium/sodium:proton antiporter                        | 891.446962 | 0.4045334  | 0.12429619 | 3.25459224 | 0.00337011 |
| Potassium-transporting ATPase C chain                                                            | 320.490867 | 0.40448113 | 0.13290495 | 3.04338641 | 0.0064759  |
| Kup system potassium uptake protein                                                              | 1119.61426 | 0.40423394 | 0.10587992 | 3.81785281 | 0.00048691 |
| 2-keto-3-deoxy-D-arabino-heptulosonate-7-phosphate synthase I alpha                              | 17303.289  | 0.40356791 | 0.09096597 | 4.4364712  | 4.05E-05   |
| Phenylalanyl-tRNA synthetase alpha chain                                                         | 5023.92803 | 0.40343808 | 0.09423333 | 4.28126762 | 7.77E-05   |
| AroM protein                                                                                     | 724.210847 | 0.40260035 | 0.13583209 | 2.96395617 | 0.00812331 |
| Dipeptide transport system permease protein DppB (TC 3.A.1.5.2)%3B putative hemin permease       | 1161.46657 | 0.40250635 | 0.11251525 | 3.58896004 | 0.00110768 |
| Dipeptide transport ATP-binding protein DppF (TC 3.A.1.5.2)                                      | 1581.36199 | 0.40223081 | 0.12590016 | 3.19483953 | 0.00406827 |
| Uncharacterized ABC transporter%2C permease component YrbE                                       | 1318.70648 | 0.40178185 | 0.10907534 | 3.68352611 | 0.0007932  |
| Sialic acid transporter (permease) NanT                                                          | 96.97534   | 0.401781   | 0.17619529 | 2.28031637 | 0.04794448 |
| Formate dehydrogenase O gamma subunit                                                            | 1913.38323 | 0.40105639 | 0.10193947 | 3.93425994 | 0.00031556 |
| S-adenosylmethionine:tRNA ribosyltransferase-isomerase                                           | 881.391623 | 0.40088479 | 0.09529015 | 4.20699075 | 0.00010573 |
| Rhodanese-related sulfurtransferases                                                             | 1791.86693 | 0.40085961 | 0.12386354 | 3.23630036 | 0.00356488 |
| DNA-binding protein H-NS                                                                         | 65364.9062 | 0.40057771 | 0.10339434 | 3.87427112 | 0.00039435 |
| Cation transport regulator chaB                                                                  | 552.94642  | 0.39935841 | 0.1594144  | 2.50515893 | 0.0280687  |
| Molybdenum cofactor biosynthesis protein MoaA                                                    | 2268.52164 | 0.39925241 | 0.10280773 | 3.88348646 | 0.00038029 |
| BAX protein                                                                                      | 826.895605 | 0.39899932 | 0.16388533 | 2.43462503 | 0.03352001 |
| FIG001587: exported protein                                                                      | 3070.81253 | 0.39890276 | 0.07951629 | 5.01661707 | 2.74E-06   |
| Transcriptional regulator NanR                                                                   | 2322.59224 | 0.39880336 | 0.08474784 | 4.70576424 | 1.22E-05   |
| Glutathione-regulated potassium-efflux system ancillary protein KefG                             | 722.500133 | 0.39879772 | 0.1150249  | 3.46705542 | 0.001673   |
| Putative lipoprotein                                                                             | 1566.50642 | 0.39737323 | 0.10720302 | 3.70672693 | 0.00072929 |
| DNA polymerase III subunits gamma and tau                                                        | 2898.866   | 0.39730178 | 0.08340049 | 4.76378242 | 9.28E-06   |
| Exoribonuclease II                                                                               | 5663.52286 | 0.39709137 | 0.09916358 | 4.00440751 | 0.0002411  |
| hypothetical protein                                                                             | 151.872916 | 0.39681713 | 0.15703173 | 2.52698696 | 0.02662826 |
| Putative major fimbrial subunit precursor                                                        | 101.845794 | 0.39657988 | 0.17034531 | 2.32809392 | 0.04302447 |
| Alkyl hydroperoxide reductase protein C                                                          | 54332.6178 | 0.39629443 | 0.14724112 | 2.69146577 | 0.01742017 |
| Lysyl-lysine 2%2C3-aminomutase                                                                   | 1327.93722 | 0.39514612 | 0.09497367 | 4.16058609 | 0.00012738 |
| Multidrug translocase MdfA                                                                       | 845.408088 | 0.39157201 | 0.10406043 | 3.762929   | 0.00059469 |
| Lipopolysaccharide core biosynthesis protein WaaP                                                | 1884.84451 | 0.39142281 | 0.12517597 | 3.12698048 | 0.00501832 |
| Inner membrane protein YiaH                                                                      | 280.741477 | 0.39021    | 0.13408425 | 2.91018516 | 0.00948339 |
| hypothetical protein                                                                             | 1521.88811 | 0.38948449 | 0.13370311 | 2.91305481 | 0.00940189 |
| Benzoate transport protein                                                                       | 338.825267 | 0.38937456 | 0.12772806 | 3.04846531 | 0.00637116 |
| 5'-nucleotidase YjiG                                                                             | 1295.25453 | 0.38879342 | 0.10102405 | 3.84852346 | 0.00043446 |
| Lipopolysaccharide core biosynthesis protein RfaY                                                | 1046.95803 | 0.38753476 | 0.16232826 | 2.38735242 | 0.03742941 |
| Glycerophosphoryl diester phosphodiesterase                                                      | 1046.4206  | 0.38530293 | 0.12462773 | 3.09163088 | 0.00559236 |
| Putative oxidoreductase linked to yggC                                                           | 209.898694 | 0.38427223 | 0.14963853 | 2.56800319 | 0.02394439 |
| 5'-nucleotidase                                                                                  | 130.371937 | 0.38401099 | 0.15727641 | 2.44163113 | 0.0329392  |
| Integration host factor alpha subunit                                                            | 20508.7557 | 0.38392732 | 0.10284033 | 3.7332371  | 0.00066197 |
| FIG017861: hypothetical protein                                                                  | 2008.17501 | 0.38392457 | 0.11049082 | 3.47471919 | 0.00163251 |
| Lysine decarboxylase 2%2C constitutive                                                           | 3613.36418 | 0.38365114 | 0.10721262 | 3.57841396 | 0.00114848 |
| Gluconate permease%2C Bsu4004 homolog                                                            | 297.821103 | 0.38362437 | 0.13803871 | 2.77910725 | 0.01369516 |
| Putative membrane protein                                                                        | 327.569731 | 0.38214429 | 0.1144922  | 3.33773213 | 0.00257976 |

|                                                                                          |            |            |            |            |            |
|------------------------------------------------------------------------------------------|------------|------------|------------|------------|------------|
| 3'(2')%2C5'-bisphosphate nucleotidase                                                    | 7543.52845 | 0.3819036  | 0.09321151 | 4.09717226 | 0.00016502 |
| Isoaspartyl aminopeptidase                                                               | 8618.1051  | 0.37974452 | 0.13176611 | 2.88195897 | 0.01027897 |
| Ferredoxin%2C 2Fe-2S                                                                     | 1968.1488  | 0.37936116 | 0.11339621 | 3.34544836 | 0.00251716 |
| Putative alanine/glycine transport protein                                               | 386.3429   | 0.37889663 | 0.10494537 | 3.61041781 | 0.00102792 |
| Putative oxidoreductase                                                                  | 4582.88019 | 0.37664958 | 0.10972903 | 3.43254271 | 0.00188719 |
| Putative membrane protein                                                                | 627.359776 | 0.37647812 | 0.1051515  | 3.58034017 | 0.00114085 |
| General secretion pathway protein E                                                      | 271.239191 | 0.37542605 | 0.13872381 | 2.70628427 | 0.01675694 |
| FIG00642307: hypothetical protein                                                        | 1693.17439 | 0.3748276  | 0.11335005 | 3.30681445 | 0.00285443 |
| 3-oxoacyl-[acyl-carrier-protein] synthase%2CKASIII                                       | 6198.33677 | 0.37316996 | 0.0950192  | 3.92731114 | 0.00032272 |
| Cardiolipin synthetase                                                                   | 3481.57246 | 0.37278942 | 0.12414505 | 3.00285378 | 0.00727635 |
| Ferrochelatase%2C protoheme ferro-lyase                                                  | 2696.58051 | 0.37133589 | 0.0938291  | 3.95757721 | 0.00028864 |
| General secretion pathway protein D                                                      | 440.660262 | 0.37057613 | 0.13307462 | 2.78472439 | 0.01346732 |
| Lipoprotein spr precursor                                                                | 1493.12025 | 0.36957206 | 0.13080934 | 2.82527268 | 0.01206773 |
| Cell volume regulation protein A                                                         | 2821.50938 | 0.36956313 | 0.07227809 | 5.11307294 | 1.71E-06   |
| Glutaredoxin 3 (Grx3)                                                                    | 1039.09907 | 0.36932543 | 0.116293   | 3.17581817 | 0.00432343 |
| putative transporter%2C permease protein                                                 | 1080.21271 | 0.36886903 | 0.10630817 | 3.46980883 | 0.00165905 |
| FIG00638331: hypothetical protein                                                        | 1974.51637 | 0.36845131 | 0.11448117 | 3.21844465 | 0.00378503 |
| ProQ: influences osmotic activation of compatible solute ProP                            | 6403.36895 | 0.36600738 | 0.08247069 | 4.4380297  | 4.03E-05   |
| Long-chain-fatty-acid--CoA ligase                                                        | 95.1432372 | 0.3638968  | 0.08657083 | 4.20345761 | 0.00010721 |
| Positive transcription regulator EvgA                                                    | 985.798079 | 0.36341698 | 0.11200879 | 3.24453994 | 0.00347848 |
| Putative uncharacterized protein YaiO                                                    | 274.526387 | 0.36243491 | 0.13744531 | 2.6369392  | 0.02004991 |
| Lysine-specific permease                                                                 | 906.138193 | 0.3619114  | 0.119953   | 3.01711016 | 0.00698159 |
| FIG00638475: hypothetical protein                                                        | 258.670048 | 0.36182428 | 0.15105328 | 2.39534202 | 0.03672634 |
| Penicillin-insensitive transglycosylase                                                  | 1285.6296  | 0.35990754 | 0.11017832 | 3.26659134 | 0.00324344 |
| Thiamin-phosphate pyrophosphorylase                                                      | 28855.2335 | 0.35838998 | 0.09847088 | 3.63955309 | 0.00092689 |
| UDP-glucose:(glucosyl)lipopolysaccharide alpha-1%2C3-glucosyltransferase WaaO            | 2194.18289 | 0.35831705 | 0.1174404  | 3.05105437 | 0.00633502 |
| Hemolysins and related proteins containing CBS domains                                   | 939.28939  | 0.35772982 | 0.10234033 | 3.4954922  | 0.00152289 |
| Pyruvate formate-lyase                                                                   | 554.962445 | 0.35734606 | 0.11915931 | 2.99889322 | 0.00734205 |
| Allophanate hydrolase 2 subunit 1                                                        | 7149.14758 | 0.35664985 | 0.12318822 | 2.89516201 | 0.00989991 |
| Thiamine kinase                                                                          | 1065.75251 | 0.35536242 | 0.12812937 | 2.77346571 | 0.0139183  |
| Putative uncharacterized protein ydbH                                                    | 2376.21045 | 0.3548023  | 0.11127278 | 3.18858127 | 0.00414972 |
| Protein YkiA                                                                             | 411.500473 | 0.35435284 | 0.12380135 | 2.86226947 | 0.01085624 |
| FIG00638480: hypothetical protein                                                        | 510.875908 | 0.35361869 | 0.09976466 | 3.54452865 | 0.0012931  |
| Putative GTP-binding protein                                                             | 238.739348 | 0.35292793 | 0.1294599  | 2.72615646 | 0.01584665 |
| Thymidine kinase                                                                         | 474.816998 | 0.35290292 | 0.11748488 | 3.00381573 | 0.00725756 |
| regulator of length of O-antigen component of lipopolysaccharide chains                  | 2504.71549 | 0.35265256 | 0.09715446 | 3.62981322 | 0.00095914 |
| FIG01068233: hypothetical protein                                                        | 678.472107 | 0.35187236 | 0.14574932 | 2.41422989 | 0.03518907 |
| Penicillin-binding protein 2 (PBP-2)                                                     | 1538.71157 | 0.35147827 | 0.09017331 | 3.89780822 | 0.00036131 |
| UPF0225 protein YchJ                                                                     | 493.088016 | 0.35139904 | 0.1165171  | 3.01585812 | 0.00699662 |
| Multimodular transpeptidase-transglycosylase                                             | 1485.54039 | 0.35138355 | 0.11186763 | 3.14106557 | 0.00481493 |
| FIG136845: Rhodanese-related sulfurtransferase                                           | 897.686492 | 0.34982962 | 0.13297787 | 2.63073565 | 0.02033716 |
| Cytoplasmic alpha-amylase                                                                | 6192.85207 | 0.34973579 | 0.0949329  | 3.68403152 | 0.00079221 |
| Transcriptional regulator%2C TetR family                                                 | 3704.84751 | 0.34914011 | 0.09476345 | 3.6843331  | 0.00079185 |
| Transcription termination factor Rho                                                     | 25911.1406 | 0.34889071 | 0.09110687 | 3.82946643 | 0.00046592 |
| Carbon starvation protein A paralogue                                                    | 44721.8532 | 0.34746278 | 0.08584877 | 4.04738222 | 0.0002028  |
| UPF0131 protein YtfP                                                                     | 3042.86766 | 0.34739855 | 0.12718556 | 2.73143073 | 0.0156361  |
| FIG00639050: hypothetical protein                                                        | 660.976502 | 0.34644007 | 0.14636586 | 2.36694592 | 0.03919312 |
| 23S rRNA (guanine-N-2-)-methyltransferase rlmG                                           | 423.494855 | 0.34478794 | 0.10809829 | 3.18957805 | 0.00413797 |
| Chitobiose-specific 6-phospho-beta-glucosidase ChbF                                      | 440.061297 | 0.34244343 | 0.11103109 | 3.08421201 | 0.00571675 |
| Thiamin biosynthesis protein ThiC                                                        | 76851.3073 | 0.34240679 | 0.11867163 | 2.88532978 | 0.01018634 |
| Copper resistance protein D                                                              | 2402.10842 | 0.34167312 | 0.09125566 | 3.74413091 | 0.00063673 |
| Cytoplasmic copper homeostasis protein CutC                                              | 1075.34878 | 0.34016216 | 0.10093103 | 3.3702436  | 0.0023147  |
| Two-component sensor protein RcsC                                                        | 1935.70122 | 0.33981573 | 0.08100039 | 4.19523567 | 0.00011098 |
| type 1 fimbriae adaptor protein FimF                                                     | 799.6109   | 0.3397525  | 0.108461   | 3.13248556 | 0.00494595 |
| CFA/I fimbrial minor adhesin                                                             | 1054.8465  | 0.33969744 | 0.12626151 | 2.69042759 | 0.01746542 |
| FIG004016: Uncharacterized protein YggN                                                  | 1387.6143  | 0.33791218 | 0.10361311 | 3.26128783 | 0.00329794 |
| Peptide transport system permease protein SapB                                           | 1041.567   | 0.33731914 | 0.10932734 | 3.08540526 | 0.005704   |
| Epoxyqueuosine (oQ) reductase QueG                                                       | 775.095764 | 0.33690589 | 0.12637408 | 2.66594139 | 0.01860097 |
| tRNA(Cytosine32)-2-thiocytidine synthetase                                               | 443.43123  | 0.33643898 | 0.11517425 | 2.92113023 | 0.00919221 |
| Polymyxin resistance protein ArnA_DH%2CUDP-glucuronic acid decarboxylase                 | 5294.69312 | 0.33638093 | 0.1112478  | 3.02370869 | 0.00684027 |
| Mobile element protein                                                                   | 190.88188  | 0.33609019 | 0.13706757 | 2.45200377 | 0.03212719 |
| 4-hydroxybenzoyl-CoA thioesterase family active site                                     | 616.427136 | 0.33319913 | 0.10522512 | 3.16653607 | 0.00445564 |
| COG1272: Predicted membrane protein hemolysin III homolog                                | 2932.02694 | 0.33315683 | 0.11374964 | 2.9288605  | 0.00900683 |
| Cytochrome O ubiquinol oxidase subunit II                                                | 23176.27   | 0.33310561 | 0.09355347 | 3.56059072 | 0.00122076 |
| NAD(P)HX epimerase / NAD(P)HX dehydratase                                                | 3784.76507 | 0.33262104 | 0.09297155 | 3.5776647  | 0.00115097 |
| Putative exported protein                                                                | 707.287277 | 0.33201466 | 0.11969349 | 2.77387397 | 0.01391003 |
| FIG00638940: hypothetical protein                                                        | 1473.06837 | 0.33107877 | 0.10242057 | 3.23254187 | 0.00360762 |
| iron aquisition outer membrane yersiniabactin receptor (FyuA%2CPSn%2Cpepticin receptor)  | 130122.094 | 0.33077483 | 0.09764779 | 3.38742775 | 0.00219302 |
| Chitobiose-specific regulator ChbR%2C AraC family                                        | 392.952516 | 0.33053536 | 0.13856511 | 2.38541553 | 0.03760955 |
| Acyl-phosphate:glycerol-3-phosphate O-acyltransferase PlsY                               | 367.995392 | 0.32983305 | 0.1356448  | 2.43159376 | 0.03376972 |
| 6-phosphofructokinase class II                                                           | 4317.21221 | 0.32941433 | 0.09463601 | 3.48085599 | 0.00159986 |
| Xylanase                                                                                 | 963.331923 | 0.32924616 | 0.12808037 | 2.57062163 | 0.02378767 |
| Tellurite resistance protein TehA                                                        | 563.75847  | 0.32877786 | 0.13035722 | 2.52212995 | 0.02694605 |
| Exonuclease ABC subunit C                                                                | 6132.2442  | 0.32607415 | 0.1091261  | 2.98804909 | 0.00756003 |
| FUSARIC ACID RESISTANCE PROTEIN FUSB / FUSARIC ACID RESISTANCE PROTEIN FUSC              | 407.861608 | 0.32508032 | 0.13735365 | 2.36673965 | 0.03919686 |
| Electron transport complex protein RnfE                                                  | 412.468185 | 0.32490276 | 0.1227495  | 2.64687638 | 0.0195395  |
| tRNA uridine 5-carboxymethylaminomethyl modification enzyme GidA                         | 4353.07502 | 0.32486187 | 0.07585705 | 4.28255348 | 7.74E-05   |
| Glutaredoxin 2                                                                           | 5344.61717 | 0.3244624  | 0.12097337 | 2.68209766 | 0.01788785 |
| Lipoprotein YcfM%2C part of a salvage pathway of unknown substrate                       | 5824.28442 | 0.32353737 | 0.08772245 | 3.68819359 | 0.00078063 |
| Phosphoethanolamine transferase specific for the outer Kdo residue of lipopolysaccharide | 504.806238 | 0.32323065 | 0.10881741 | 2.97039462 | 0.00797665 |
| Queuosine Biosynthesis QueE Radical SAM                                                  | 572.401609 | 0.32317987 | 0.09863298 | 3.27659022 | 0.0031421  |
| FIG000988: Predicted permease                                                            | 3303.68831 | 0.32241752 | 0.08282872 | 3.89258101 | 0.00036861 |
| Putative transport protein                                                               | 349.424333 | 0.32199209 | 0.13101232 | 2.45772375 | 0.03166547 |
| Serine transporter                                                                       | 282.318264 | 0.32143066 | 0.13549182 | 2.37232517 | 0.03864494 |
| D-mannonate oxidoreductase                                                               | 1028.93098 | 0.32096964 | 0.09847428 | 3.25942618 | 0.0033155  |
| 3-oxoacyl-[acyl-carrier protein] reductase                                               | 13349.813  | 0.31962255 | 0.12862082 | 2.48499856 | 0.0295949  |
| Lipoprotein                                                                              | 1314.20169 | 0.31909959 | 0.09328764 | 3.42059869 | 0.00196418 |
| DNA polymerase III delta prime subunit                                                   | 1659.26073 | 0.31890676 | 0.09235806 | 3.45293924 | 0.00175831 |
| CFA/I fimbrial auxiliary subunit                                                         | 2181.09621 | 0.31782116 | 0.13153292 | 2.41628616 | 0.03502399 |
| Iron-sulfur cluster regulator IscR                                                       | 8943.60524 | 0.31748559 | 0.07639348 | 4.15592526 | 0.00012989 |
| Cystine ABC transporter%2C permease protein                                              | 1383.8709  | 0.31315307 | 0.09498032 | 3.29703113 | 0.0029407  |
| L-arabinose transport system permease protein (TC 3.A.1.2.2)                             | 415.227852 | 0.31110074 | 0.12923105 | 2.40732196 | 0.03572704 |
| Osmolarity sensory histidine kinase EnvZ                                                 | 2395.70164 | 0.31056602 | 0.10179684 | 3.05084154 | 0.0063579  |
| Trilactone hydrolase IroD                                                                | 41158.605  | 0.31038566 | 0.09314425 | 3.33231164 | 0.00262376 |
| Carbon storage regulator                                                                 | 3754.16296 | 0.30997824 | 0.13354714 | 2.32111477 | 0.04367217 |
| Lysophospholipid transporter LpIT                                                        | 657.876499 | 0.30956583 | 0.11058146 | 2.79943708 | 0.01295818 |
| ABC transport system%2C permease component YbhS                                          | 6043.51453 | 0.30907133 | 0.11651962 | 2.65252596 | 0.01925466 |
| 23S rRNA (Uracil-5-)-methyltransferase rumB                                              | 733.903741 | 0.30899487 | 0.10585826 | 2.91894895 | 0.00924648 |
| Chitinase                                                                                | 1043.62901 | 0.30883494 | 0.10176487 | 3.03478937 | 0.0063618  |
| Predicted chaperone lipoprotein YacC%2C potentially involved in protein secretion        | 627.26191  | 0.30846147 | 0.13189243 | 2.33873514 | 0.04201047 |
| Adenine phosphoribosyltransferase                                                        | 1841.04612 | 0.30845341 | 0.07928573 | 3.8904026  | 0.00037135 |
| Ethanolamine utilization protein EutA                                                    | 239.4228   | 0.30737702 | 0.133299   | 2.3059215  | 0.04522189 |
| Putative flagellin structural protein                                                    | 2713.11846 | 0.30716829 | 0.12752222 | 2.40874328 | 0.03561932 |
| Inner membrane protein YcdZ                                                              | 1145.76214 | 0.30708935 | 0.1073038  | 2.86186834 | 0.01086406 |
| ATP-dependent helicase HrpA                                                              | 7651.33324 | 0.30658234 | 0.11076089 | 2.76796556 | 0.01412941 |
| Putative cytoplasmic protein                                                             | 374.337592 | 0.30583642 | 0.13189858 | 2.31712547 | 0.04401762 |
| Sensor protein basS/pmrB                                                                 | 987.284301 | 0.30573668 | 0.10301052 | 2.96801424 | 0.00803413 |

FIGfam014588: Predicted regulator of CFA/I fimbriae  
regulator of length of O-antigen component of lipopolysaccharide chains  
Long-chain fatty acid transport protein  
Transcriptional regulator  
AMP nucleosidase  
N-ethylmaleimide reductase  
FIG143263: Glycosyl transferase / Lysophospholipid acyltransferase  
Cell division protein DivIC (FtsB)%2C stabilizes FtsL against RasP cleavage  
FIG00613574: hypothetical protein  
hypothetical tRNA/rRNA methyltransferase yfiF  
Putative cytoplasmic protein  
Ribosomal small subunit pseudouridine synthase A  
Nitrate/nitrite sensor protein  
MFS family multidrug transport protein%2C tetracycline resistance protein  
LysR family transcriptional regulator YnfL  
Peptide transport periplasmic protein SapA  
Putative efflux (PET) family inner membrane protein YccS  
ATP-dependent DNA helicase Rep  
Formyltetrahydrofolate deformylase  
Putative transport protein  
Uncharacterized ABC transporter%2C ATP-binding protein YrbF  
Inner membrane protein yciS  
Similarity with glutathionylperoxidase synthase  
Formate dehydrogenase O alpha subunit  
FIG065221: Holliday junction DNA helicase  
Cell division protein FtsK  
BigB  
Ribonuclease I precursor  
AmpG permease  
3-dehydroquinate synthase  
Sulfur carrier protein adenyltransferase ThiF  
Chromosome partition protein MukF  
Putative membrane protein  
tRNA pseudouridine synthase B  
Ethanolamine ammonia-lyase heavy chain  
hypothetical protein  
Multidrug-efflux transporter%2C major facilitator superfamily (MFS) (TC 2.A.1)  
Acyl carrier protein (ACP2)  
L-threonine transporter%2C anaerobically inducible  
DNA-cytosine methyltransferase  
Evolved beta-D-galactosidase transcriptional repressor  
2-ketobutyrate formate-lyase  
Flavoprotein MioC  
Nitrite-sensitive transcriptional repressor NsrR  
Heat shock (predicted periplasmic) protein YciM%2C precursor  
Cystine ABC transporter%2C ATP-binding protein  
FIG000906: Predicted Permease  
Qercetin 2%2C3-dioxygenase  
Mobile element protein  
Formate dehydrogenase O beta subunit  
Thymidylate kinase  
Putative Diguanylate cyclase/phosphodiesterase domain 1  
NADH-ubiquinone oxidoreductase chain K  
putative integrase  
Oligopeptide transport ATP-binding protein OppF (TC 3.A.1.5.1)  
Cellulose synthase operon protein C  
tRNA (uracil(54)-C5)-methyltransferase  
Protein-export membrane protein SecD (TC 3.A.5.1.1)  
CDP-diacylglycerol--serine O-phosphatidyltransferase  
NAD-dependent malic enzyme  
Hypothetical transcriptional regulator yeeY  
Multidrug transporter MdtC  
1-acyl-sn-glycerol-3-phosphate acyltransferase  
YciO family  
GlpG protein (membrane protein of glp regulon)  
Cell division protein ZipA  
UPF0313 protein ygiQ  
Autolysis histidine kinase LytS  
N-acetylmuramoyl-L-alanine amidase  
23S rRNA (guanosine-2'-O)-methyltransferase rlmB  
Universal stress protein E  
YcfL protein: an outer membrane lipoprotein that is part of a salvage cluster  
MotA/TolQ/ExbB proton channel family protein  
Septum site-determining protein MinC  
Gluconate utilization system Gnt-I transcriptional repressor  
Guanylate kinase  
Transcription antitermination protein NusG  
ATP-dependent Clp protease ATP-binding subunit ClpX  
hypothetical protein  
Outer membrane lipoprotein carrier protein LolA  
D-serine/D-alanine/glycine transporter  
FIG021952: putative membrane protein  
Galactose operon repressor%2C GalR-LacI family of transcriptional regulators  
Glutathione-regulated potassium-efflux system ATP-binding protein  
Ribosome small subunit-stimulated GTPase EngC  
FIG00641337: hypothetical protein  
Proline-specific permease proY  
Ribosomal-protein-S5p-alanine acetyltransferase  
RND efflux system%2C inner membrane transporter CmeB  
YpfJ protein%2C zinc metalloprotease superfamily  
HTH-type transcriptional regulator hdfR  
Ribosomal protein L11 methyltransferase  
Dihydroneopterin triphosphate epimerase  
Undecaprenyl-diphosphatase  
SeqA protein%2C negative modulator of initiation of replication  
FIG00639052: hypothetical protein  
LptA%2C protein essential for LPS transport across the periplasm  
Chorismate mutase I  
tRNA-(6)A37 methylthiotransferase  
RNA polymerase sigma-54 factor RpoN  
Glucose-1-phosphatase  
formate dehydrogenase formation protein FdhE  
putative collagenase  
Outer membrane protein A precursor  
Putative ATPase component of ABC transporter with duplicated ATPase domain  
Putative ABC iron siderophore transporter%2C fused permease and ATPase domains  
Aerobic respiration control protein arcA

966.174041 0.3050097 0.12685361 2.40442268 0.035961  
2419.57747 0.30486188 0.11489528 2.65338899 0.01922508  
537.032151 0.30458538 0.09525954 3.19742655 0.00403692  
1528.83225 0.30451536 0.11533235 2.64032911 0.01989075  
7567.67671 0.30359718 0.11253328 2.69784343 0.0171254  
2137.5375 0.30223868 0.10342863 2.92219539 0.00916727  
4049.67301 0.30187614 0.1242491 2.42960428 0.03393952  
321.924739 0.3009649 0.12940801 2.32570537 0.04322031  
3211.52402 0.3009022 0.10463384 2.87576369 0.01045414  
3394.17217 0.29988975 0.11669634 2.56982988 0.0238303  
560.873977 0.29867571 0.11826563 2.52546497 0.0267308  
1049.17097 0.29859594 0.11570917 2.58057285 0.02319331  
1806.25531 0.29844189 0.09572667 3.11764613 0.00516448  
964.278441 0.29749426 0.12014679 2.47608994 0.03024154  
295.435463 0.29509259 0.12987413 2.272143 0.04878527  
1856.39561 0.29384621 0.09682511 3.03481398 0.00663618  
892.484216 0.29295896 0.11044032 2.65264504 0.01925466  
805.545419 0.29280865 0.11856685 2.46956588 0.03076904  
3613.67355 0.29216863 0.07748385 3.77070344 0.00057819  
397.686897 0.29135514 0.12165555 2.39491866 0.03675159  
2101.90153 0.29094412 0.10801204 2.6936267 0.01731667  
938.140055 0.29046728 0.08616179 3.37118424 0.00230831  
368.62656 0.28832231 0.10791502 2.67175332 0.01833502  
13603.8677 0.28666828 0.09292727 3.08486712 0.00571094  
5665.86871 0.28634672 0.09283977 3.08431106 0.00571675  
24451.7864 0.28572242 0.08466003 3.37493886 0.00227854  
3206.54267 0.28532567 0.08634399 3.3045225 0.00287161  
1786.83484 0.28378733 0.09370459 3.02853172 0.00675157  
32836.929 0.28377309 0.10778306 2.63281727 0.02026407  
6251.85124 0.27995273 0.07714499 3.62891646 0.00096179  
33219.022 0.27959807 0.10272659 2.72176917 0.01603342  
2585.48073 0.27922308 0.09003158 3.10139044 0.0054371  
8723.76418 0.27893389 0.08811789 3.16546271 0.00446666  
4713.00992 0.27860484 0.09412685 2.95988689 0.00820267  
533.886705 0.27849742 0.12204888 2.28185148 0.04779459  
556.314415 0.27807763 0.09979861 2.78638766 0.01340553  
844.616928 0.27363071 0.11085123 2.46844997 0.03083549  
1078.02124 0.27273337 0.10441472 2.61202031 0.02136639  
591.062102 0.27222451 0.11750891 2.31662873 0.04405575  
627.424804 0.27210191 0.1188445 2.28956263 0.04698327  
582.98649 0.27132547 0.10500501 2.58392883 0.02298027  
862.529361 0.27064599 0.11958511 2.26320821 0.04987048  
1615.33546 0.26866479 0.10338538 2.59867291 0.02211539  
2339.71747 0.26798237 0.11012001 2.43354839 0.03360389  
2468.16918 0.26768666 0.07635586 3.5057774 0.00147427  
1682.55839 0.26667395 0.08350947 3.19333805 0.00408697  
3893.53459 0.26642234 0.08965724 2.97156531 0.00795081  
2073.12715 0.26623128 0.09344585 2.84904338 0.01127492  
1534.05738 0.26599006 0.09465493 2.81010249 0.01256334  
3974.98515 0.26496413 0.10305271 2.5711516 0.02376306  
1506.49509 0.2642448 0.07580595 3.48580555 0.00157376  
2327.41617 0.26408434 0.09133719 2.89131244 0.01001153  
574.803681 0.26383866 0.11602003 2.27407848 0.04858218  
1159.17826 0.26283418 0.09033807 2.90945076 0.00950043  
7495.48699 0.26191065 0.09332588 2.80640971 0.01269463  
19219.7329 0.26188971 0.09380823 2.79175622 0.01322028  
848.62678 0.26053374 0.08984437 2.89983371 0.00975895  
9423.27585 0.26005689 0.08947162 2.90658534 0.00957725  
2466.24956 0.25905713 0.09359287 2.76791533 0.01412941  
16046.4025 0.2584469 0.10476232 2.46698333 0.03093236  
1209.50645 0.25752747 0.08810247 2.92304477 0.00915629  
640.571825 0.25498553 0.09900891 2.57537955 0.0234978  
111.896914 0.25420657 0.09411087 2.70113921 0.0169878  
2406.50512 0.25340799 0.08463074 2.99427819 0.007437  
665.599845 0.25306256 0.09942081 2.54536801 0.0253783  
7817.73979 0.25293941 0.10003744 2.52844736 0.02655671  
1153.89883 0.2519424 0.0999055 2.52180702 0.02695763  
668.825893 0.25142129 0.10059674 2.49929851 0.02849579  
5040.35228 0.25138355 0.06782473 3.7063701 0.00072979  
4999.81924 0.25106673 0.09294446 2.70125534 0.0169878  
25370.2603 0.25088383 0.10529085 2.38276946 0.03779291  
3246.88472 0.24931245 0.10493058 2.37597515 0.0384155  
2406.52675 0.24852341 0.08002036 3.1057522 0.00536132  
2675.24405 0.24761645 0.08354348 2.96392301 0.00812331  
1030.04325 0.2457125 0.07864975 3.12413586 0.00506101  
3474.23992 0.24561212 0.07940937 3.09298673 0.00557349  
5942.19801 0.24336431 0.09227719 2.63731826 0.02003766  
42568.2943 0.24157378 0.06585087 3.66849788 0.00083825  
12315.0211 0.23985925 0.09583354 2.50287738 0.028228  
5995.13618 0.23486557 0.10235418 2.29463592 0.04640134  
5810.42671 0.23456065 0.08255533 2.8412538 0.01152275  
4553.38993 0.23436916 0.08383072 2.79574303 0.01307922  
1666.88374 0.23231814 0.09667714 2.40303076 0.03606433  
1764.92074 0.23218247 0.09147684 2.53815561 0.02586924  
2368.90925 0.23105138 0.08682551 2.66110013 0.01881908  
7032.73013 0.22988496 0.09751014 2.35754932 0.04008822  
1811.31676 0.22630644 0.08267212 2.73739744 0.01537946  
3241.43576 0.22569111 0.09957551 2.26653235 0.04948387  
830.411561 0.22544292 0.09418966 2.39349958 0.03685962  
989.940988 0.2244617 0.09345442 2.40183068 0.03613455  
3815.67618 0.22427818 0.09764603 2.29684898 0.04617291  
781.787184 0.22198229 0.08942972 2.48219822 0.02975667  
780.680763 0.2216539 0.09167777 2.41774977 0.0349273  
807.537962 0.22163169 0.09158448 2.41996997 0.03478616  
2691.4834 0.21949084 0.08573386 2.5601418 0.02444454  
6373.97238 0.21906322 0.07391813 2.96359257 0.00812745  
4123.19675 0.21517032 0.09267975 2.32165412 0.0436294  
1480.17433 0.21491778 0.09356278 2.2970435 0.04617005  
2720.46546 0.21477716 0.08498374 2.52727345 0.02661957  
8586.78544 0.21375728 0.06437921 3.32028423 0.00273068  
4037.07619 0.2131369 0.0738473 2.88618426 0.01016432  
1985.70709 0.21151828 0.07733574 2.73506497 0.01548074  
747.98415 0.21079453 0.09084801 2.32029878 0.04374716  
542418.306 0.21052034 0.07111209 2.96040153 0.0081936  
3207.78432 0.21010946 0.08949261 2.34778566 0.04107897  
45911.7726 0.20953662 0.09047834 2.31587593 0.04412391  
24672.6566 0.20774925 0.08892643 2.33619232 0.04221972

DinG family ATP-dependent helicase YoaA  
2-acylglycerophosphoethanolamine acyltransferase  
RNA methyltransferase%2C TrmH family%2C group 1  
Polyribonucleotide nucleotidyltransferase  
Cytochrome c-type biogenesis protein DsbD%2Cprotein-disulfide reductase  
Methionyl-tRNA formyltransferase  
Ribosome-binding factor A  
ATP-dependent RNA helicase RhlB  
23S rRNA (guanine-N-2-)-methyltransferase rmlL  
Transcriptional repressor protein TyrR  
TidD protein%2C part of TidE/TidD proteolytic complex  
Histidyl-tRNA synthetase  
GTP-binding and nucleic acid-binding protein YchF  
YcFP protein: probably an esterase that is part of a salvage cluster  
Nucleoside-diphosphate-sugar epimerases  
DNA gyrase subunit A  
Enoyl-[acyl-carrier-protein] reductase [NADH]  
Porphobilinogen deaminase  
Cysteinyl-tRNA synthetase  
DNA polymerase I  
Copper homeostasis protein CutF precursor / Lipoprotein NlpE involved in surface adhesion  
N6-hydroxylysine O-acetyltransferase  
LSU ribosomal protein L15p (L27Ae)  
DNA gyrase subunit B  
Mir7403 protein  
Ribulose-phosphate 3-epimerase  
Mobile element protein  
HIPA PROTEIN  
Acriflavine resistance protein A (AcrA)  
Putative oligonucleotide cyclase/dehydratase or lipid transport protein YjfG  
3'-2'5'-cyclic-nucleotide phosphodiesterase  
Leucyl/phenylalanyl-tRNA--protein transferase  
Chaperone-modulator protein CbpM  
Thymidylate synthase  
2-ketoaldonate reductase%2C broad specificity  
Cyclopropane-fatty-acyl-phospholipid synthase  
Magnesium and cobalt efflux protein CorC  
Diaminohydroxyphosphoribosylaminopyrimidine deaminase  
Octanoate-[acyl-carrier-protein]-protein-N-octano yltransferase  
MotA/TolQ/ExbB proton channel family protein  
RNA efflux system%2C inner membrane transporter CmeB  
Molybdopterin biosynthesis protein MoeA  
GTPase and tRNA-U34 5-formylation enzyme TrmE  
Methylenetetrahydrofolate dehydrogenase (NADP+)  
Putative uncharacterized protein STY3991  
Spermidine N1-acetyltransferase  
S-ribosylhomocysteine lyase  
Two-component response regulator CreB  
Putative deoxyribonuclease YjiV  
Positive regulator of CheA protein activity (CheW)  
Protein-L-isopartate O-methyltransferase  
Transcriptional regulator NanR  
Glucose-1-phosphate thymidyltransferase  
LSU ribosomal protein L30p (L7e)  
Cell division protein Mrz2  
Naphthoate synthase  
Survival protein SurA precursor (Peptidyl-prolyl cis-trans isomerase SurA)  
Glutathione peroxidase  
DnaJ-class molecular chaperone CbpA  
Galactitol utilization operon repressor  
7-alpha-hydroxysteroid dehydrogenase  
Conserved uncharacterized protein CreA  
Mobile element protein  
iron-chelator utilization protein  
Aspartate 1-decarboxylase  
DnaJ-like protein DjlA  
Probable lipoprotein nlpC precursor  
ClpXP protease specificity-enhancing factor / Stringent starvation protein B  
Exodeoxyribonuclease III  
tolB protein precursor%2C periplasmic protein involved in the tonb-independent uptake of group A colicins  
D-alanine-D-alanine ligase A  
2%2C3%2C4%2C5-tetrahydropyridine-2%2C6-dicarboxylate N-succinyltransferase  
[Protein-Pil] uridylyltransferase  
Phosphoglycolate phosphatase  
Signal recognition particle%2C subunit Ffh SRP54 (TC 3.A.5.1.1)  
3-demethylubiquinol 3-O-methyltransferase  
Queuosine Biosynthesis QueC ATPase  
4-keto-6-deoxy-N-Acetyl-D-hexosaminyl-(Lipid carrier) aminotransferase  
Stringent starvation protein A  
Probable UDP-N-acetyl-D-mannosaminuronic acid transferase  
Fe-S protein%2C homolog of lactate dehydrogenase S01521  
FIG000859: hypothetical protein YebC  
LSU ribosomal protein L5p (L11e)  
CDP-diacylglycerol-glycerol-3-phosphate 3-phosphatidyltransferase  
Galactose-1-phosphate uridylyltransferase  
DNA mismatch repair endonuclease MutH  
Topoisomerase IV subunit A  
SSU ribosomal protein S9p (S16e)  
rRNA small subunit methyltransferase H  
Gamma-glutamyl phosphate reductase  
SgrR%2C sugar-phosphate stress%2C transcriptional activator of SgrS small RNA  
Soluble lytic murein transglycosylase precursor  
Methionine ABC transporter permease protein  
Putative phosphatase  
Erythronate-4-phosphate dehydrogenase  
Cof protein%2C HD superfamily hydrolase  
Outer Membrane Siderophore Receptor Iron  
DJ-1/YajL/PfpI superfamily%2C includes chaperone protein YajL (former ThiJ)%2C parkinsonism-associated protein DJ-1%2C peptidases PfpI%2C Hsp31  
Ferric enterobactin transport ATP-binding protein FepC (TC 3.A.1.14.2)  
UDP-N-acetylglucosamine 4-epimerase) / UDP-glucose 4-epimerase  
FIG0644695: hypothetical protein  
Multidrug resistance protein B  
Outer membrane protein NlpB%2C lipoprotein component of the protein assembly complex (forms a complex with YaeT%2C YfiO%2C and YfgL)%3B Lipoprotein-34 precursor  
Predicted endonuclease distantly related to archaeal Holliday junction resolvase  
Ferrodoxin--NADP(+) reductase  
UDP-N-acetylmuramate--alanine ligase  
5-methyltetrahydrofolate--homocysteine methyltransferase

911.886575 0.20497777 0.0880771 2.32725389 0.04306193  
1043.16197 0.20431399 0.08886486 2.29915391 0.04595505  
793.781465 0.20386478 0.0870399 2.34219906 0.04167995  
37196.0977 0.20254467 0.07353964 2.75422441 0.01469543  
1705.44301 0.19451929 0.08345894 2.33071842 0.0427829  
3258.28392 0.19004075 0.07104445 2.67495565 0.01817948  
2314.61026 0.18803118 0.07500396 2.50695015 0.02796753  
7134.78451 0.18790019 0.07908619 2.37589129 0.0384155  
3061.19362 0.1715518 0.0725732 2.36384506 0.03946801  
6634.33207 0.16691769 0.06974584 2.39322799 0.03686697  
5085.49596 0.16213501 0.06334857 2.55941091 0.02448103  
5078.13556 -0.1582266 0.06989943 -2.263632 0.04983762  
4228.3023 -0.1588549 0.06500386 -2.443776 0.03275963  
3270.19983 -0.1824076 0.0782891 -2.3299231 0.0428542  
5739.8808 -0.1857535 0.08165816 -2.2747694 0.04851607  
9762.39172 -0.1951661 0.08552232 -2.2820492 0.04779125  
8223.17278 -0.1978668 0.08305672 -2.3823092 0.0378226  
4979.30137 -0.2000888 0.08706178 -2.2982397 0.0460453  
3208.4783 -0.2011541 0.07130917 -2.8208732 0.01219496  
12931.4197 -0.2022139 0.08427621 -2.3994184 0.03635396  
1775.24029 -0.2040969 0.08970247 -2.2752648 0.04847485  
41772.8951 -0.2059647 0.08935738 -2.3049546 0.04531724  
27370.024 -0.2106675 0.08105638 -2.5990244 0.0221038  
11482.8754 -0.2115486 0.07592106 -2.7864288 0.01340553  
2939.54062 -0.214142 0.09368696 -2.285718 0.04743943  
3086.16658 -0.2162756 0.08345118 -2.591642 0.02249382  
2107.98704 -0.2176853 0.0764149 -2.8487279 0.01127998  
1489.08532 -0.2192966 0.09633129 -2.2764839 0.04836359  
13550.8262 -0.2235847 0.07928509 -2.8200099 0.01222124  
752.116063 -0.2236995 0.08860664 -2.5246363 0.02676773  
3820.27325 -0.22431 0.08756052 -2.5617713 0.02436626  
1048.35614 -0.2244177 0.08763286 -2.5608848 0.02441644  
4088.38849 -0.2254405 0.09386292 -2.4018052 0.03613455  
2042.9388 -0.2268282 0.09427086 -2.4061322 0.03581163  
2413.35145 -0.2279321 0.09982916 -2.2832212 0.0477087  
27305.4481 -0.227933 0.08498964 -2.6818913 0.01788964  
9406.67178 -0.2340384 0.1000488 -2.339242 0.04197278  
7432.10478 -0.234299 0.07741777 -3.0264236 0.00678701  
729.795002 -0.2346663 0.08604753 -2.7271703 0.01582286  
11343.4539 -0.2351049 0.08399115 -2.7991627 0.01296226  
35026.8191 -0.2366077 0.09040924 -2.6170744 0.02107375  
4230.90846 -0.2379416 0.09116554 -2.6099955 0.02146688  
2425.86016 -0.2393377 0.10159312 -2.3558452 0.04025405  
5573.07315 -0.2395833 0.07552618 -3.1721889 0.00437515  
1186.6334 -0.2424863 0.08505124 -2.8510615 0.0112097  
4039.7468 -0.2425726 0.09770863 -2.4826121 0.02973645  
9054.46835 -0.2447905 0.0869963 -2.8138038 0.01243293  
1798.62026 -0.2454136 0.09165776 -2.6774992 0.01806533  
1349.1717 -0.2457686 0.09451654 -2.600271 0.0220457  
11957.3033 -0.2485844 0.10567834 -2.3522734 0.04062401  
1595.89952 -0.2489084 0.094553 -2.6324751 0.02027423  
1150.74908 -0.2496248 0.08831035 -2.8266771 0.01202142  
2062.11187 -0.2500433 0.09639298 -2.5939986 0.02236249  
5952.56755 -0.2507323 0.09203323 -2.7243667 0.01592447  
4249.31744 -0.2512863 0.09565315 -2.6270577 0.02051689  
2244.78647 -0.2524654 0.09878299 -2.555758 0.02469367  
17584.8682 -0.2532777 0.10348471 -2.4474888 0.03248596  
1057.81588 -0.2549809 0.09520997 -2.6780905 0.01804732  
14510.0637 -0.2563423 0.08785396 -2.9178231 0.00926446  
794.072589 -0.2567867 0.10487126 -2.4485895 0.03240233  
6626.40838 -0.2568606 0.1058306 -2.4270918 0.03415927  
930.370893 -0.2578596 0.09472833 -2.7220957 0.01602595  
3839.06973 -0.2579403 0.08149127 -3.1652509 0.00446719  
3631.49245 -0.2582115 0.09326109 -2.7686948 0.0141106  
5890.3536 -0.2584598 0.08610887 -3.0015465 0.00729559  
964.097778 -0.2586183 0.09485022 -2.7265963 0.01584211  
1573.47709 -0.2593329 0.09490146 -2.732655 0.01558628  
3735.75772 -0.2597342 0.09742897 -2.6658825 0.01860097  
865.51227 -0.2616434 0.10833726 -2.415082 0.03512342  
14959.4279 -0.2617802 0.08676537 -3.017105 0.00698159  
2761.33557 -0.2624834 0.10438275 -2.5146247 0.02743269  
23452.6248 -0.2628011 0.09370922 -2.8044313 0.01276596  
12612.1414 -0.2633829 0.10132331 -2.5994308 0.02208868  
3498.72887 -0.2642468 0.10079707 -2.6215717 0.0208291  
5013.15868 -0.2643335 0.06445016 -4.1013629 0.0001622  
335.406621 -0.2648213 0.11607432 -2.2814808 0.04781965  
1494.03731 -0.2649906 0.09997044 -2.65069 0.01934978  
2336.5619 -0.2659915 0.08495694 -3.1308973 0.00496678  
6512.15034 -0.266125 0.0843803 -3.1538757 0.00463091  
685.297341 -0.267661 0.10850556 -2.4667956 0.03093374  
8838.7238 -0.2700473 0.10904019 -2.4765853 0.03021415  
4030.21506 -0.2701811 0.1095923 -2.4653295 0.03104573  
25334.6466 -0.2703236 0.09610776 -2.8127138 0.01246846  
1894.76795 -0.2708329 0.11738357 -2.3072473 0.04508385  
3945.52913 -0.2713446 0.10017779 -2.7086302 0.01665627  
447.507031 -0.2724359 0.11122306 -2.449455 0.03234001  
2932.73785 -0.2724889 0.08250794 -3.3025774 0.00288867  
14753.7436 -0.2735351 0.11751935 -2.3275745 0.04304478  
10528.0633 -0.2735443 0.08529216 -3.2071446 0.00391746  
10846.4766 -0.2737463 0.08271649 -3.3094526 0.00283129  
1901.82016 -0.274434 0.09343962 -2.9370196 0.00878797  
4989.32919 -0.2747965 0.08008899 -3.4311395 0.00189572  
3359.41903 -0.2749518 0.0883238 -3.1129985 0.00524023  
470.721451 -0.2755844 0.10598037 -2.6003344 0.0220457  
2138.38161 -0.2756851 0.07468262 -3.6914218 0.00077179  
1095.47883 -0.278195 0.09872418 -2.8179016 0.01228195  
113235.538 -0.2782862 0.09959607 -2.7941485 0.01313687  
3316.68397 -0.278623 0.11419568 -2.439873 0.03308416  
4803.80158 -0.2787332 0.09420273 -2.958865 0.00822529  
5067.35277 -0.2794627 0.09915243 -2.8185162 0.01226505  
642.386353 -0.2795002 0.11989822 -2.3311453 0.04275374  
723.707534 -0.2802052 0.11462622 -2.4445123 0.03270843  
12119.2619 -0.28064 0.09389063 -2.9890099 0.00754918  
920.420226 -0.2811945 0.12109674 -2.322065 0.04360158  
3652.99425 -0.2816002 0.12264141 -2.2961264 0.04624015  
15910.9944 -0.2847699 0.10549683 -2.6993217 0.01705835  
8045.49922 -0.284993 0.08467288 -3.3658121 0.00234762

|                                                                                                              |            |            |            |            |            |
|--------------------------------------------------------------------------------------------------------------|------------|------------|------------|------------|------------|
| DnaA regulatory inactivator Hda (Homologous to DnaA)                                                         | 1229.79052 | -0.2850937 | 0.09815583 | -2.9045007 | 0.00963593 |
| MFS superfamily export protein YceL                                                                          | 3962.09903 | -0.2851055 | 0.11313535 | -2.5200394 | 0.02706598 |
| Molybdopterin biosynthesis protein MoeB                                                                      | 1826.41392 | -0.2861193 | 0.09382867 | -3.0493801 | 0.00635551 |
| SSU ribosomal protein S5p (S2e)                                                                              | 25738.2035 | -0.286132  | 0.09236893 | -3.0977085 | 0.00549854 |
| Glutaminyl-tRNA synthetase                                                                                   | 9004.14013 | -0.286209  | 0.07272482 | -3.9355063 | 0.00031422 |
| SSU ribosomal protein S2p (S4e)                                                                              | 26786.8348 | -0.2864717 | 0.11435042 | -2.5052094 | 0.0280687  |
| FIG00638135: hypothetical protein                                                                            | 505.808889 | -0.2874877 | 0.09556077 | -3.0084279 | 0.00715654 |
| D-alanine-D-alanine ligase                                                                                   | 12137.5166 | -0.2876372 | 0.10734792 | -2.6794859 | 0.01798153 |
| Copper-sensing two-component system response regulator CpxR                                                  | 5541.76239 | -0.2882962 | 0.08143052 | -3.5403949 | 0.0013108  |
| Aspartate-semialdehyde dehydrogenase                                                                         | 2517.26911 | -0.2900492 | 0.11258426 | -2.5762857 | 0.02344794 |
| Pyridoxal kinase                                                                                             | 1906.49434 | -0.2905895 | 0.07766985 | -3.7413421 | 0.00064267 |
| UPF0149 exported protein YgfB                                                                                | 2600.21613 | -0.2908241 | 0.10219735 | -2.8457105 | 0.01138123 |
| Poly(A) polymerase                                                                                           | 7992.92476 | -0.2910995 | 0.07818708 | -3.7231156 | 0.00068655 |
| D-alanyl-D-alanine carboxypeptidase                                                                          | 2861.94831 | -0.2923351 | 0.08092426 | -3.6124535 | 0.00102279 |
| Glutamate 5-kinase                                                                                           | 9749.521   | -0.2927024 | 0.07383167 | -3.9644561 | 0.00028135 |
| LSU ribosomal protein L23p (L23Ae)                                                                           | 11241.6285 | -0.2929001 | 0.11068038 | -2.6463598 | 0.01955942 |
| Per-activated serine protease autotransporter enterotoxin EspC                                               | 7937.26922 | -0.293631  | 0.08231918 | -3.5669817 | 0.00119221 |
| LysR family transcriptional regulator YeiE                                                                   | 897.06785  | -0.2948873 | 0.11001013 | -2.6805469 | 0.01793387 |
| Asparaginyl-tRNA synthetase                                                                                  | 12205.1588 | -0.294923  | 0.09028594 | -3.2665443 | 0.00324344 |
| NfuA Fe-S protein maturation                                                                                 | 4062.07381 | -0.2950787 | 0.1008744  | -2.925209  | 0.00909792 |
| S-formylglutathione hydrolase                                                                                | 923.362726 | -0.2954165 | 0.11699    | -2.5251432 | 0.02674221 |
| Putative PTS system IIA component yadI                                                                       | 524.275763 | -0.2954517 | 0.10021815 | -2.9480859 | 0.00849848 |
| Aspartokinase                                                                                                | 5487.63262 | -0.295541  | 0.0836593  | -3.5326733 | 0.00134409 |
| TldE protein%2C part of TldE/TldD proteolytic complex                                                        | 7377.69003 | -0.2960716 | 0.06963989 | -4.2514651 | 8.81E-05   |
| Putative sugar kinase%2C PfkB family protein                                                                 | 349.357801 | -0.2961578 | 0.11340551 | -2.6114937 | 0.02138859 |
| COG2110%2C Macro domain%2C possibly ADP-ribose binding module                                                | 992.520362 | -0.2963698 | 0.11628888 | -2.5485652 | 0.02518398 |
| Ribosomal RNA small subunit methyltransferase C                                                              | 1493.83421 | -0.2973576 | 0.10342971 | -2.8749724 | 0.01047464 |
| Phosphatase YidA                                                                                             | 3860.64846 | -0.2980112 | 0.09498444 | -3.1374736 | 0.00487138 |
| Universal stress protein F                                                                                   | 2878.63643 | -0.2997401 | 0.11928317 | -2.512845  | 0.02755806 |
| Hypoxanthine-guanine phosphoribosyltransferase                                                               | 1853.33099 | -0.2998538 | 0.09269861 | -3.234718  | 0.00358247 |
| Putative uncharacterized protein YeaK                                                                        | 1410.90239 | -0.3000953 | 0.09589446 | -3.1294331 | 0.00498436 |
| Outer membrane protein X precursor                                                                           | 129907.434 | -0.3002757 | 0.08410934 | -3.5700636 | 0.00117992 |
| Ribonucleotide reductase transcriptional regulator NrdR                                                      | 2492.44868 | -0.3003768 | 0.09785408 | -3.0696402 | 0.00597838 |
| FIG00639467: hypothetical protein                                                                            | 3662.21219 | -0.3010392 | 0.12921546 | -2.3297461 | 0.04285485 |
| Mannonate dehydratase                                                                                        | 488.806554 | -0.3021777 | 0.13227773 | -2.2844183 | 0.04758031 |
| Undecaprenyl diphosphate synthase                                                                            | 4982.44908 | -0.3028115 | 0.07288756 | -4.1545021 | 0.00013059 |
| Cell division protein FtsA                                                                                   | 15467.7923 | -0.3053641 | 0.10232829 | -2.9841614 | 0.0076437  |
| Protein acetyltransferase                                                                                    | 1229.03185 | -0.3062201 | 0.08698518 | -3.5203707 | 0.00140413 |
| Dephospho-CoA kinase                                                                                         | 1779.68326 | -0.3071498 | 0.09249459 | -3.3207323 | 0.00272867 |
| FIG00638276: hypothetical protein                                                                            | 486.81559  | -0.3071961 | 0.11560009 | -2.6573853 | 0.01901804 |
| Putative ABC transporter ATP-binding protein                                                                 | 1716.10139 | -0.3075727 | 0.12758095 | -2.4108045 | 0.03547362 |
| GTP-binding protein EngB                                                                                     | 521.370305 | -0.3081014 | 0.12714219 | -2.4232823 | 0.03448691 |
| AmpE protein                                                                                                 | 3029.55644 | -0.3084382 | 0.08747958 | -3.5258312 | 0.00137739 |
| Putative oxidoreductase                                                                                      | 911.5923   | -0.3086461 | 0.12804306 | -2.4104866 | 0.03548553 |
| LSU ribosomal protein L18p (L1e)                                                                             | 15358.5024 | -0.3099081 | 0.09687769 | -3.1989625 | 0.00401794 |
| 2-octaprenyl-3-methyl-6-methoxy-1%2C4-benzoquinol hydroxylase                                                | 3322.97744 | -0.3103687 | 0.09683559 | -3.20511   | 0.00394038 |
| Citrate-6-N-acetyl-6-N-hydroxy-L-lysine ligase%2Calpha subunit                                               | 76161.7677 | -0.3108579 | 0.09304151 | -3.3410668 | 0.00255227 |
| tRNA dimethylallyltransferase                                                                                | 15699.4299 | -0.3109299 | 0.08976904 | -3.4636646 | 0.00169195 |
| LSU ribosomal protein L6p (L9e)                                                                              | 23770.6715 | -0.3110457 | 0.09968409 | -3.1203145 | 0.00512099 |
| FIG00640454: hypothetical protein                                                                            | 2328.8335  | -0.3134882 | 0.08966046 | -3.4963932 | 0.00151879 |
| Putative Transposase                                                                                         | 337.844785 | -0.3147161 | 0.12058544 | -2.6099012 | 0.02146688 |
| tRNA pseudouridine 13 synthase                                                                               | 4295.60926 | -0.3162966 | 0.09283138 | -3.4072167 | 0.00205623 |
| D-Galactonate repressor DgoR                                                                                 | 762.769131 | -0.3184434 | 0.13209154 | -2.4107784 | 0.03547362 |
| SSU ribosomal protein S6p                                                                                    | 12038.946  | -0.318695  | 0.09259872 | -3.4416783 | 0.00182704 |
| D-serine dehydratase                                                                                         | 724.248794 | -0.3192612 | 0.11947819 | -2.6721298 | 0.01832387 |
| 2-C-methyl-D-erythritol 2%2C4-cyclodiphosphate synthase                                                      | 1251.24051 | -0.3194073 | 0.11583776 | -2.7573674 | 0.01457029 |
| FIG00638108: hypothetical protein                                                                            | 1971.54058 | -0.3201184 | 0.11347357 | -2.8210835 | 0.01219496 |
| Right origin-binding protein                                                                                 | 14211.7958 | -0.3212227 | 0.10597592 | -3.0310915 | 0.00670628 |
| Multimodular transpeptidase-transglycosylase                                                                 | 12363.3692 | -0.3219349 | 0.0757218  | -4.2515479 | 8.81E-05   |
| FIG00613320: hypothetical protein                                                                            | 6990.18518 | -0.3229279 | 0.10225877 | -3.1579486 | 0.00457225 |
| ABC transporter%2C permease protein YnjC                                                                     | 451.970343 | -0.3235778 | 0.13033504 | -2.4826618 | 0.02973645 |
| 16S rRNA processing protein RimM                                                                             | 17521.3936 | -0.3240351 | 0.12910168 | -2.5099214 | 0.02774678 |
| LSU ribosomal protein L4p (L1e)                                                                              | 23914.1228 | -0.3243957 | 0.11610765 | -2.7939217 | 0.01313908 |
| UDP-N-acetyluramoylalanine-D-glutamate ligase                                                                | 15380.837  | -0.3263202 | 0.08226197 | -3.9668421 | 0.00027909 |
| NADH dehydrogenase                                                                                           | 12035.4816 | -0.3270771 | 0.11913501 | -2.7454324 | 0.01504737 |
| L-threonine 3-dehydrogenase                                                                                  | 16375.7924 | -0.3275232 | 0.08189969 | -3.9990767 | 0.00024579 |
| Uncharacterized protein conserved in bacteria                                                                | 1067.32585 | -0.3277894 | 0.12444613 | -2.6339867 | 0.02020462 |
| Oligopeptidase A                                                                                             | 9239.22631 | -0.328267  | 0.10996664 | -2.9851512 | 0.00762334 |
| Mannitol operon repressor                                                                                    | 1019.41396 | -0.3288936 | 0.10666121 | -3.0835348 | 0.00572639 |
| FIG00896075: hypothetical protein                                                                            | 4879.45363 | -0.3289759 | 0.14131811 | -2.3279104 | 0.04302588 |
| Putative inner membrane protein                                                                              | 510.600002 | -0.3304113 | 0.10365475 | -3.1876142 | 0.00415852 |
| ADP-L-glycero-D-manno-heptose-6-epimerase                                                                    | 6822.11556 | -0.3311898 | 0.08834784 | -3.7487033 | 0.00062663 |
| Murein endopeptidase                                                                                         | 2288.03815 | -0.3321995 | 0.08050174 | -4.1266131 | 0.00014587 |
| Cytochrome c heme lyase subunit CcmF                                                                         | 510.060864 | -0.3323231 | 0.11075023 | -3.0006535 | 0.00731231 |
| Deoxyribose operon repressor%2C DeoR family                                                                  | 969.574837 | -0.333326  | 0.11588371 | -2.8763833 | 0.01043937 |
| iron aquisition yersiniabactin synthesis enzyme (Irp1%2Cpolyketide synthetase)                               | 516629.191 | -0.3345931 | 0.10815299 | -3.0937013 | 0.00556671 |
| 2-octaprenyl-6-methoxyphenol hydroxylase                                                                     | 4985.73971 | -0.335181  | 0.09775375 | -3.4288302 | 0.00190937 |
| Anaerobic selenate reductase%2C molybdenum cofactor-containing periplasmic protein                           | 456.996806 | -0.3352906 | 0.1458234  | -2.2992923 | 0.04595505 |
| CTP synthase                                                                                                 | 15597.7853 | -0.3362576 | 0.09633556 | -3.4904828 | 0.00154857 |
| DNA polymerase II                                                                                            | 7571.50693 | -0.3367476 | 0.08884088 | -3.7904584 | 0.00053772 |
| Nucleoid-associated protein NdpA                                                                             | 1243.88542 | -0.3372719 | 0.10973975 | -3.0733796 | 0.00591093 |
| Flavodoxin 2                                                                                                 | 808.993919 | -0.337485  | 0.10385847 | -3.2494704 | 0.00342302 |
| Putative membrane protein YfcA                                                                               | 890.593034 | -0.3388928 | 0.1491285  | -2.2724887 | 0.04876295 |
| Putative inner membrane protein                                                                              | 320.301485 | -0.3392838 | 0.12743938 | -2.6623148 | 0.01876088 |
| Mechanosensitive ion channel                                                                                 | 1299.09713 | -0.3393357 | 0.09726937 | -3.488618  | 0.00155836 |
| LSU ribosomal protein L3p (L3e)                                                                              | 27485.1586 | -0.3405679 | 0.10386793 | -3.278855  | 0.00312291 |
| Exported zinc metalloprotease YfgC precursor                                                                 | 3092.94253 | -0.3409362 | 0.08624368 | -3.9531734 | 0.00029353 |
| Aspartyl-tRNA synthetase                                                                                     | 11060.8682 | -0.3415125 | 0.09259721 | -3.6881507 | 0.00078063 |
| Iron(III) dicitrate transport system permease protein FecC (TC 3.A.1.14.1)                                   | 1169.7792  | -0.3422226 | 0.12229548 | -2.7983258 | 0.01298895 |
| Agmatinase                                                                                                   | 1409.74021 | -0.343383  | 0.1095432  | -3.134681  | 0.00491205 |
| Predicted ATP-dependent endonuclease of the OLD family%2CYbJD subgroup                                       | 6391.72709 | -0.3440147 | 0.1071813  | -3.2096521 | 0.00388825 |
| Phenazine biosynthesis protein PhzF                                                                          | 785.181609 | -0.3447095 | 0.10173959 | -3.3881546 | 0.00218866 |
| Phosphoenolpyruvate-dihydroxyacetone phosphotransferase                                                      | 537.442452 | -0.3460364 | 0.12173023 | -2.8426495 | 0.01147864 |
| Phosphoglycerate mutase                                                                                      | 1423.2534  | -0.3462125 | 0.12256724 | -2.8246743 | 0.01207724 |
| Acetyl esterase                                                                                              | 199.841514 | -0.346327  | 0.1300088  | -2.6638735 | 0.01870285 |
| ABC transporter%2C ATP-binding protein                                                                       | 10726.6171 | -0.3492743 | 0.08996078 | -3.882517  | 0.00038151 |
| FKBP-type peptidyl-prolyl cis-trans isomerase FklB                                                           | 1534.15011 | -0.3493673 | 0.10425777 | -3.3509951 | 0.00247369 |
| 6%2C7-dimethyl-8-ribityllumazine synthase                                                                    | 4890.99668 | -0.3499203 | 0.08881859 | -3.9397195 | 0.000309   |
| Multidrug resistance protein A                                                                               | 557.817839 | -0.3502201 | 0.10550415 | -3.3194911 | 0.00273669 |
| Mobile element protein                                                                                       | 282.73937  | -0.3506751 | 0.14731733 | -2.3804064 | 0.03800083 |
| Acyl carrier protein phosphodiesterase                                                                       | 1121.9741  | -0.3509463 | 0.11850879 | -2.9613526 | 0.00817294 |
| RelE/StbE replicon stabilization toxin                                                                       | 4296.47377 | -0.3510872 | 0.11465322 | -3.0621664 | 0.00611887 |
| Putative ATP-binding component of a transport system                                                         | 683.217788 | -0.3519237 | 0.1034742  | -3.4010773 | 0.00209222 |
| Outer membrane lipoprotein SmpA%2C a component of the essential YaeT outer-membrane protein assembly complex | 3255.26155 | -0.3519519 | 0.09236081 | -3.8106192 | 0.00050062 |
| Co-activator of prophage gene expression IbrA                                                                | 5920.16903 | -0.3520019 | 0.09032044 | -3.8972562 | 0.00036185 |
| Membrane protein involved in the export of O-antigen%2C teichoic acid lipoteichoic acids                     | 1118.38624 | -0.3531492 | 0.10687184 | -3.3044177 | 0.00287161 |
| C4-dicarboxylate transporter DcuA                                                                            | 7798.15498 | -0.3535362 | 0.11037757 | -3.2029715 | 0.00396732 |

|                                                                                                  |            |            |            |            |            |
|--------------------------------------------------------------------------------------------------|------------|------------|------------|------------|------------|
| 3-dehydroquinate dehydratase I                                                                   | 1374.63581 | -0.3536093 | 0.11759781 | -3.0069379 | 0.00718757 |
| Fructokinase                                                                                     | 180.027479 | -0.3536481 | 0.14866142 | -2.3788828 | 0.03814055 |
| COG1720: Uncharacterized conserved protein                                                       | 1337.21246 | -0.3537877 | 0.11759241 | -3.0085926 | 0.00715654 |
| Translation elongation factor Ts                                                                 | 26920.1914 | -0.3540894 | 0.1145859  | -3.0901657 | 0.00561669 |
| Methionine aminotransferase%2C PLP-dependent                                                     | 1098.22146 | -0.3544095 | 0.1285205  | -2.7576103 | 0.01456717 |
| MltA-interacting protein MlpA                                                                    | 1575.45692 | -0.3548997 | 0.10228639 | -3.4696672 | 0.00165905 |
| Ribosome hibernation protein YhbH                                                                | 10815.096  | -0.3570036 | 0.09901796 | -3.6054433 | 0.00104485 |
| Ferric hydroxamate ABC transporter (TC 3.A.1.14.3)%2C ATP-binding protein FhuC                   | 3790.918   | -0.3570092 | 0.10969937 | -3.2544323 | 0.00337011 |
| Cob(I)alamin adenosyltransferase                                                                 | 1649.13659 | -0.3570473 | 0.08480339 | -4.2102946 | 0.00010447 |
| ATP binding protein                                                                              | 3240.70801 | -0.3571888 | 0.09317087 | -3.8336962 | 0.00045868 |
| TsaD/Kae1/Orf7 protein%2C required for threonylcarbamoyladenine t(6)A37 formation in tRNA        | 1479.07952 | -0.35838   | 0.14222103 | -2.5198807 | 0.02706598 |
| SSU ribosomal protein S8p (S15Ae)                                                                | 2180.3792  | -0.3591301 | 0.09599227 | -3.7412404 | 0.00064267 |
| 2%2C5-diketo-D-gluconic acid reductase                                                           | 2381.50158 | -0.3602299 | 0.13687406 | -2.6318346 | 0.02029198 |
| Periplasmic beta-glucosidase                                                                     | 3202.87372 | -0.3613931 | 0.09506941 | -3.8013603 | 0.00051694 |
| Deoxyguanosinetriphosphate triphosphohydrolase                                                   | 4360.26534 | -0.3617908 | 0.08753496 | -4.1331008 | 0.00014229 |
| Uncharacterized protein YeaC                                                                     | 766.333768 | -0.362571  | 0.13763964 | -2.6342046 | 0.02020189 |
| Transcription termination protein NusB                                                           | 9262.7556  | -0.3627172 | 0.10709517 | -3.386868  | 0.00219462 |
| Uracil-DNA glycosylase%2C family 1                                                               | 1335.18783 | -0.3630816 | 0.14341815 | -2.5316296 | 0.02634275 |
| Putative cytoplasmic protein                                                                     | 1244.54475 | -0.3631698 | 0.11129916 | -3.2630053 | 0.00328008 |
| Chorismate synthase                                                                              | 3631.18405 | -0.3637167 | 0.07522757 | -4.8348849 | 6.60E-06   |
| ShiA homolog                                                                                     | 2449.15087 | -0.3647944 | 0.12172581 | -2.9968535 | 0.00738712 |
| Hypothetical transcriptional regulator ygbI                                                      | 492.660288 | -0.3672537 | 0.12482303 | -2.9421947 | 0.00865698 |
| putative secreted protein                                                                        | 3514.70726 | -0.3673657 | 0.09338114 | -3.9340459 | 0.00031563 |
| Mobile element protein                                                                           | 13976.5067 | -0.367447  | 0.10848023 | -3.3872255 | 0.0021932  |
| LSU ribosomal protein L24p (L26e)                                                                | 14769.9732 | -0.367686  | 0.10391252 | -3.5384183 | 0.00131791 |
| FIG001674: hypothetical protein                                                                  | 1105.43785 | -0.3685432 | 0.12313314 | -2.9930464 | 0.00746281 |
| Malate dehydrogenase                                                                             | 18605.683  | -0.3689096 | 0.11580519 | -3.1856055 | 0.00418237 |
| Hydrogenase maturation protease                                                                  | 737.261413 | -0.3690573 | 0.12722151 | -2.9009036 | 0.00973645 |
| hemimethylated DNA binding protein YccV                                                          | 2708.56005 | -0.3690924 | 0.15948905 | -2.314218  | 0.04429848 |
| Sensor protein of zinc sigma-54-dependent two-component system                                   | 356.478196 | -0.371119  | 0.12411596 | -2.990099  | 0.00753091 |
| NADP-specific glutamate dehydrogenase                                                            | 17132.7782 | -0.371215  | 0.10888447 | -3.4092556 | 0.00204227 |
| Cytidine deaminase                                                                               | 4380.01768 | -0.3717562 | 0.08879417 | -4.1867182 | 0.00011464 |
| Tagatose 1%2C6-bisphosphate aldolase                                                             | 171.632425 | -0.3721457 | 0.16040149 | -2.3200889 | 0.04375168 |
| L-arabinose 1-dehydrogenase                                                                      | 2298.77628 | -0.3722207 | 0.10992797 | -3.3860417 | 0.00219979 |
| ADP-heptose synthase                                                                             | 5275.54093 | -0.3724781 | 0.07270188 | -5.1233626 | 1.63E-06   |
| Phospholipase A1 precursor                                                                       | 880.433637 | -0.3731963 | 0.12779595 | -2.9202515 | 0.00921304 |
| FIG00641015: hypothetical protein                                                                | 188.363541 | -0.3742918 | 0.16146513 | -2.3180971 | 0.04394402 |
| Riboflavin kinase                                                                                | 6176.34327 | -0.3745597 | 0.06648849 | -5.6334512 | 1.07E-07   |
| Cystathionine gamma-synthase                                                                     | 1875.26389 | -0.3751227 | 0.094994   | -3.9489094 | 0.00029857 |
| FIG01199637: hypothetical protein                                                                | 1165.89162 | -0.3778173 | 0.10673712 | -3.5396991 | 0.00131335 |
| tRNA.Cm32/Ums2 methyltransferase                                                                 | 2260.98464 | -0.3785209 | 0.090504   | -4.182367  | 0.00011645 |
| N-acetylmutaromyl-L-alanine amidase                                                              | 1969.59214 | -0.3796869 | 0.09519875 | -3.9883603 | 0.00025653 |
| Folate-dependent protein for Fe/S cluster synthesis/repair in oxidative stress                   | 4064.80491 | -0.3803773 | 0.0884024  | -4.3027944 | 7.09E-05   |
| ABC transporter%2C ATP-binding protein YnjD                                                      | 214.572537 | -0.3807725 | 0.1583926  | -2.403979  | 0.03598779 |
| Uridine kinase                                                                                   | 799.962241 | -0.3819665 | 0.10853598 | -3.519261  | 0.00140905 |
| Nucleoside permease NupG                                                                         | 557.77816  | -0.3821322 | 0.1030732  | -3.7073868 | 0.00072793 |
| L-seryl-tRNA(Sec) selenium transferase                                                           | 1829.73072 | -0.382314  | 0.09013522 | -4.2415613 | 9.17E-05   |
| Lipoprotein signal peptidase                                                                     | 5173.09957 | -0.3825253 | 0.09807793 | -3.9002183 | 0.00035828 |
| D-mannonate oxidoreductase                                                                       | 812.167263 | -0.3827309 | 0.09591034 | -3.9905073 | 0.00025442 |
| Xaa-Pro aminopeptidase                                                                           | 10005.5881 | -0.3835397 | 0.08601848 | -4.4588055 | 3.69E-05   |
| Hydrogenase-2 operon protein hybE                                                                | 681.096028 | -0.3844173 | 0.15099739 | -2.5458536 | 0.02535548 |
| LSU ribosomal protein L35p                                                                       | 7975.67628 | -0.3845645 | 0.13111008 | -2.9331424 | 0.0088885  |
| Signal transduction histidine kinase CheA                                                        | 27896.8691 | -0.3863103 | 0.11132217 | -3.4702013 | 0.00165798 |
| ZetAlike operon repressor                                                                        | 1323.72811 | -0.3864467 | 0.16528149 | -2.3381124 | 0.04204195 |
| Thiamine-monophosphate kinase                                                                    | 2654.58488 | -0.3877028 | 0.09147234 | -4.23847   | 9.29E-05   |
| FIG002649: ydl hotdog fold superfamily                                                           | 1691.78352 | -0.3885684 | 0.10347524 | -3.7551828 | 0.00061292 |
| LSU ribosomal protein L14p (L23e)                                                                | 11574.544  | -0.3907354 | 0.10271872 | -3.8039358 | 0.00051315 |
| mobilization protein                                                                             | 6743.4465  | -0.3912103 | 0.13405884 | -2.9181982 | 0.00925847 |
| Transcription accessory protein (S1 RNA-binding domain)                                          | 2943.23074 | -0.3923488 | 0.10877898 | -3.6068444 | 0.00103996 |
| Catalase                                                                                         | 21318.9789 | -0.3933696 | 0.11530795 | -3.41147   | 0.00202845 |
| Putative RTX family exoprotein A gene                                                            | 8498.28803 | -0.3935085 | 0.12847007 | -3.0630366 | 0.0061047  |
| 3-hydroxypropionate dehydrogenase                                                                | 8909.57885 | -0.3946542 | 0.0984443  | -4.0089086 | 0.00023674 |
| Holo-[acyl-carrier protein] synthase                                                             | 1206.4135  | -0.3956497 | 0.10248069 | -3.8607238 | 0.00041525 |
| Putative membrane protein                                                                        | 1777.66995 | -0.3960425 | 0.08067373 | -4.9091882 | 4.63E-06   |
| Monofunctional biosynthetic peptidoglycan transglycosylase                                       | 1666.7005  | -0.3962587 | 0.10199097 | -3.885233  | 0.00037786 |
| L-fucose operon activator                                                                        | 647.622922 | -0.3963878 | 0.12593094 | -3.1476606 | 0.00472476 |
| Homoserine/homoserine lactone efflux protein                                                     | 270.907244 | -0.3966721 | 0.1460069  | -2.7168035 | 0.01626746 |
| Putative metabolite transport protein yaaU                                                       | 203.856512 | -0.3972223 | 0.13870028 | -2.8638895 | 0.01080677 |
| Altronate oxidoreductase                                                                         | 244.189336 | -0.3978908 | 0.12366441 | -3.2175041 | 0.00379511 |
| Outer membrane lipoprotein pcg precursor                                                         | 11535.0785 | -0.3985372 | 0.08966087 | -4.44494   | 3.91E-05   |
| Antigen polymerase O6                                                                            | 823.71633  | -0.3996196 | 0.16258234 | -2.4579523 | 0.03166048 |
| Translation initiation factor 3                                                                  | 12781.073  | -0.3999189 | 0.12331158 | -3.243158  | 0.00349319 |
| Ferric enterobactin-binding periplasmic protein FepB (TC 3.A.1.14.2)                             | 6039.04337 | -0.4003344 | 0.08105444 | -4.9390805 | 4.02E-06   |
| Anaerobic glycerol-3-phosphate dehydrogenase subunit C                                           | 136.183287 | -0.400751  | 0.17246921 | -2.3236093 | 0.04344249 |
| DcrB protein precursor                                                                           | 3965.93769 | -0.4009647 | 0.10489656 | -3.8224771 | 0.00047896 |
| Cytochrome c heme lyase subunit CcmL / Cytochrome c heme lyase subunit CcmH                      | 497.570788 | -0.4015581 | 0.10284056 | -3.9046671 | 0.00035205 |
| DNA polymerase IV                                                                                | 5031.07115 | -0.4016163 | 0.10741525 | -3.7389129 | 0.00064816 |
| tRNA (5-methylaminomethyl-2-thiouridylate)-methyltransferase                                     | 1846.39333 | -0.4026109 | 0.11600622 | -3.4705974 | 0.00165665 |
| Protein yjbr                                                                                     | 2235.75578 | -0.402789  | 0.1081778  | -3.7233983 | 0.00068629 |
| Trehalose operon transcriptional repressor                                                       | 2205.36294 | -0.4031574 | 0.12390912 | -3.253654  | 0.00337724 |
| Arsenate reductase                                                                               | 1936.57583 | -0.4033323 | 0.11001666 | -3.666102  | 0.00084491 |
| Hydrogen peroxide-inducible genes activator                                                      | 8595.32211 | -0.4034357 | 0.08816735 | -4.5757949 | 2.19E-05   |
| Alanyl-tRNA synthetase                                                                           | 20485.7708 | -0.4036274 | 0.09257708 | -4.3599068 | 5.57E-05   |
| Succinate-semialdehyde dehydrogenase [NAD]                                                       | 3079.83271 | -0.4038876 | 0.14796441 | -2.7296268 | 0.01571368 |
| FIG00638802: hypothetical protein                                                                | 230.5895   | -0.4043392 | 0.16388393 | -2.4672292 | 0.03092597 |
| Exodeoxyribonuclease I                                                                           | 2522.34856 | -0.4048029 | 0.13272255 | -3.0499938 | 0.00634625 |
| Glyoxylate carboligase                                                                           | 430.949682 | -0.4058498 | 0.11236137 | -3.6120046 | 0.00102383 |
| Putative aldolase YdjI                                                                           | 190.939089 | -0.4060822 | 0.15689523 | -2.5882377 | 0.02270607 |
| Anhydro-N-acetylmuramic acid kinase                                                              | 1602.42558 | -0.4064914 | 0.10097723 | -4.0255746 | 0.00022131 |
| C-terminal domain of ClnA type 5%3B Protein Implicated in DNA repair function with RecA and MutS | 409.859718 | -0.408887  | 0.11762448 | -3.4762062 | 0.00162458 |
| NADPH:quinone oxidoreductase 2                                                                   | 783.144205 | -0.4096651 | 0.13604947 | -3.0111479 | 0.00710092 |
| FIG00640640: hypothetical protein                                                                | 479.381592 | -0.4102648 | 0.14603357 | -2.8093872 | 0.01258454 |
| Transcriptional repressor for pyruvate dehydrogenase complex                                     | 8171.37408 | -0.4108438 | 0.13356246 | -3.0760426 | 0.00586532 |
| PTS system%2C trehalose-specific IIB component                                                   | 140.712661 | -0.4136408 | 0.17421119 | -2.3743642 | 0.03855689 |
| ABC transporter involved in cytochrome c biogenesis%2C CcmB subunit                              | 87.9194755 | -0.4137772 | 0.18173152 | -2.2768599 | 0.04835929 |
| Aspartate-semialdehyde dehydrogenase                                                             | 32623.3034 | -0.4143485 | 0.09297485 | -4.4565655 | 3.72E-05   |
| Phage tail length tape-measure protein 1                                                         | 2231.68324 | -0.4144162 | 0.15758077 | -2.6298655 | 0.02036539 |
| SSU ribosomal protein S10p (S20e)                                                                | 10892.3848 | -0.4144636 | 0.12542331 | -3.304518  | 0.00287161 |
| FIG001676: Ferredoxin                                                                            | 679.225456 | -0.4145989 | 0.12130552 | -3.4178072 | 0.00198312 |
| Cytochrome c-type biogenesis protein CcmG/DsbE%2Cthiol:disulfide oxidoreductase                  | 258.552342 | -0.4154769 | 0.17170027 | -2.41978   | 0.03478786 |
| Hydroxyacylglutathione hydrolase                                                                 | 2552.10865 | -0.4155401 | 0.13250944 | -3.1359282 | 0.00489416 |
| transposon resolvase                                                                             | 147.120359 | -0.4169088 | 0.16771094 | -2.4858772 | 0.0295362  |
| putative methylase YhfF                                                                          | 656.561454 | -0.4179341 | 0.12518202 | -3.3386107 | 0.00257327 |
| D-erythrose-4-phosphate dehydrogenase                                                            | 8336.53288 | -0.418193  | 0.12485334 | -3.3494739 | 0.0024857  |
| YgfY COG2938                                                                                     | 775.366282 | -0.418247  | 0.14116206 | -2.9628857 | 0.00813694 |
| Ferritin-like protein 2                                                                          | 1684.65506 | -0.4185141 | 0.15692671 | -2.6669399 | 0.01857108 |
| Oligopeptide ABC transporter%2C periplasmic oligopeptide-binding protein OppA (TC 3.A.1.5.1)     | 247.251848 | -0.4187912 | 0.15623063 | -2.6805958 | 0.01793387 |

|                                                                                                               |            |            |            |            |            |
|---------------------------------------------------------------------------------------------------------------|------------|------------|------------|------------|------------|
| Dihydropicolinate reductase                                                                                   | 3968.03883 | -0.4191391 | 0.08870473 | -4.7251045 | 1.11E-05   |
| Translational elongation factor P                                                                             | 3381.4252  | -0.4195608 | 0.11599335 | -3.6171105 | 0.00100529 |
| Capsular polysaccharide ABC transporter%2C permease protein KpsM                                              | 3097.90302 | -0.4208926 | 0.13376735 | -3.1464527 | 0.00474144 |
| Uncharacterized HTH-type transcriptional regulator YegW                                                       | 506.691841 | -0.4215275 | 0.13340401 | -3.1597815 | 0.00454912 |
| Pyridoxine 5'-phosphate synthase                                                                              | 2858.70285 | -0.4217885 | 0.09408088 | -4.4832538 | 3.33E-05   |
| Rare lipoprotein A precursor                                                                                  | 6180.40413 | -0.4218958 | 0.09161331 | -4.6051797 | 1.92E-05   |
| Respiratory nitrate reductase beta chain                                                                      | 688.28388  | -0.4225168 | 0.1489905  | -2.8358639 | 0.01170581 |
| Protein HI1394                                                                                                | 359.173014 | -0.4228015 | 0.13765429 | -3.0714735 | 0.00594529 |
| Orotidine 5'-phosphate decarboxylase                                                                          | 679.689911 | -0.4232405 | 0.12089148 | -3.5009949 | 0.00149586 |
| DNA recombination-dependent growth factor C                                                                   | 1083.11209 | -0.4243829 | 0.08442883 | -5.0265168 | 2.61E-06   |
| Isochorismatase                                                                                               | 130.655806 | -0.4245157 | 0.16292279 | -2.6056252 | 0.02172582 |
| Peptidyl-prolyl cis-trans isomerase PpiA precursor                                                            | 915.523596 | -0.424632  | 0.10979047 | -3.8676578 | 0.00040394 |
| Cell division protein FtsI                                                                                    | 2703.74005 | -0.4248966 | 0.148509   | -2.8610831 | 0.01087914 |
| Fructose-1%2C6-bisphosphatase%2C GlpX type                                                                    | 566.817929 | -0.4251316 | 0.10734431 | -3.9604489 | 0.00028565 |
| Adenylosuccinate synthetase                                                                                   | 33359.9638 | -0.425267  | 0.09404951 | -4.5217357 | 2.81E-05   |
| probable membrane protein b2001                                                                               | 266.251868 | -0.4257499 | 0.13760076 | -3.0940955 | 0.00556263 |
| Selenide%2Cwater dikinase                                                                                     | 9318.44636 | -0.4285902 | 0.11157236 | -3.8413652 | 0.00044664 |
| FIG138517: Putative lipid carrier protein                                                                     | 2320.80274 | -0.4298641 | 0.12543998 | -3.4268511 | 0.00192206 |
| virulence protein                                                                                             | 1183.57169 | -0.4303761 | 0.12910522 | -3.3335296 | 0.00261736 |
| Putative oxidoreductase                                                                                       | 2255.8551  | -0.4306883 | 0.11350677 | -3.7943842 | 0.00053048 |
| MchC protein                                                                                                  | 10701.5915 | -0.4307964 | 0.12862472 | -3.3492506 | 0.00248609 |
| putative%3B ORF located using Glimmer/Genemark                                                                | 880.622547 | -0.4323536 | 0.09263707 | -4.6671768 | 1.45E-05   |
| Transaldolase                                                                                                 | 2498.29322 | -0.4323722 | 0.12218682 | -3.5386159 | 0.00131783 |
| L%2CD-transpeptidase Ycf5                                                                                     | 313.785655 | -0.4326779 | 0.11780575 | -3.6728083 | 0.00082483 |
| Transcriptional regulator%2C IcdR family                                                                      | 889.670758 | -0.4337363 | 0.1178982  | -3.6789053 | 0.00080595 |
| Serine transporter                                                                                            | 438.401018 | -0.4340718 | 0.11887735 | -3.6514257 | 0.00089082 |
| Phosphoenolpyruvate-dihydroxyacetone phosphotransferase                                                       | 713.463276 | -0.434077  | 0.14587123 | -2.9757545 | 0.00785192 |
| Alcohol dehydrogenase                                                                                         | 2120.08953 | -0.434155  | 0.11515253 | -3.7702599 | 0.00057878 |
| FIG00641173: hypothetical protein                                                                             | 438.614978 | -0.4342116 | 0.16982787 | -2.5567744 | 0.02463378 |
| Transcriptional regulator KdgR%2C KDG operon repressor                                                        | 1892.81092 | -0.4342217 | 0.09889562 | -4.3907069 | 4.89E-05   |
| Ribonuclease E inhibitor RraA                                                                                 | 3726.89508 | -0.4347548 | 0.12854078 | -3.8223227 | 0.00222469 |
| Exodeoxyribonuclease VII small subunit                                                                        | 407.878977 | -0.4362416 | 0.12213714 | -3.5717356 | 0.00117323 |
| RNA polymerase sigma factor FecI                                                                              | 7114.8091  | -0.4372345 | 0.14630061 | -2.9886036 | 0.00755062 |
| Transposase YhgA                                                                                              | 174.185206 | -0.4373926 | 0.15880268 | -2.7543151 | 0.01469543 |
| FIG00643651: hypothetical protein                                                                             | 870.376157 | -0.4381164 | 0.09950835 | -4.40281   | 4.66E-05   |
| Probable electron transfer flavoprotein-quinone oxidoreductase FixC                                           | 244.083996 | -0.4382464 | 0.13541392 | -3.2363468 | 0.00356488 |
| Phosphatidylglycerophosphatase A                                                                              | 770.132585 | -0.4382592 | 0.0994279  | -4.4078094 | 4.57E-05   |
| LSU ribosomal protein L2p (L8e)                                                                               | 27709.2417 | -0.4384523 | 0.1114906  | -3.9326394 | 0.00031723 |
| Putative electron transport protein YsaA                                                                      | 293.91091  | -0.4390183 | 0.1610343  | -2.7262406 | 0.01584665 |
| ATP-dependent helicase HrpB                                                                                   | 4642.06157 | -0.4403775 | 0.07263671 | -0.6627403 | 9.28E-09   |
| Periplasmic protein torT precursor                                                                            | 249.82834  | -0.44259   | 0.15326058 | -2.8878267 | 0.01011697 |
| Glutathione reductase                                                                                         | 7873.51501 | -0.4429776 | 0.08904551 | -4.974733  | 3.37E-06   |
| LSU ribosomal protein L1p (L10Ae)                                                                             | 32282.6231 | -0.4435261 | 0.141732   | -3.1293291 | 0.00498436 |
| Uncharacterized protein YidR                                                                                  | 1104.72427 | -0.4435487 | 0.14043274 | -3.1584423 | 0.00456729 |
| Alkaline phosphatase isozyme conversion protein precursor                                                     | 1312.24622 | -0.4436616 | 0.11311161 | -3.9223347 | 0.00032836 |
| Methionine repressor MetJ                                                                                     | 669.899773 | -0.4442721 | 0.10724378 | -4.1426377 | 0.00013708 |
| 6-phospho-beta-glucosidase                                                                                    | 5979.87962 | -0.4443511 | 0.09660298 | -4.5997662 | 1.97E-05   |
| Nucleoprotein/polynucleotide-associated enzyme                                                                | 487.831746 | -0.4448987 | 0.14147083 | -3.1448091 | 0.00476238 |
| Inosine-guanosine kinase                                                                                      | 1781.97797 | -0.4449501 | 0.08019035 | -5.5486742 | 1.69E-07   |
| SSU ribosomal protein S17p (S11e)                                                                             | 13333.2109 | -0.4454286 | 0.11889813 | -3.7463042 | 0.00063171 |
| Putative Dihydroliipoamide dehydrogenase                                                                      | 2659.96573 | -0.445459  | 0.11873824 | -3.7516056 | 0.00061988 |
| LSU ribosomal protein L29p (L35e)                                                                             | 9386.66891 | -0.445639  | 0.10325395 | -4.3159513 | 6.70E-05   |
| LysR family transcriptional regulator YafC                                                                    | 1368.68732 | -0.4456513 | 0.13021934 | -3.4223129 | 0.00195314 |
| ATPase involved in DNA repair                                                                                 | 6174.65932 | -0.4461166 | 0.1280704  | -3.4833701 | 0.00158669 |
| Phospholipase/carboxylesterase family protein                                                                 | 1059.00684 | -0.4462097 | 0.0903726  | -4.9374445 | 4.05E-06   |
| FIG01200175: hypothetical protein                                                                             | 8088.53157 | -0.4464005 | 0.07511592 | -5.9428216 | 1.86E-08   |
| 4'-phosphopantetheinyl transferase                                                                            | 3372.33038 | -0.4471931 | 0.19124315 | -2.3383482 | 0.04203471 |
| Tryptophanyl-tRNA synthetase                                                                                  | 5571.00511 | -0.4480937 | 0.08844626 | -5.0662815 | 2.14E-06   |
| 1-phosphohfructokinase                                                                                        | 3673.10449 | -0.448706  | 0.1665807  | -2.6936255 | 0.01731667 |
| Selenocysteine-specific translation elongation factor                                                         | 2962.16272 | -0.449678  | 0.09543743 | -4.7117568 | 1.18E-05   |
| ABC transporter%2C periplasmic spermidine putrescine-binding protein PotD (TC 3.A.1.11.1)                     | 3330.2767  | -0.4506866 | 0.13381071 | -3.3680908 | 0.00233133 |
| Thiosulfate sulfurtransferase%2C rhodanese                                                                    | 4465.3399  | -0.4507924 | 0.12193509 | -3.6968967 | 0.00075673 |
| Xanthine-guanine phosphoribosyltransferase                                                                    | 1226.43724 | -0.4510288 | 0.1239237  | -3.639568  | 0.00092689 |
| UDP-3-O-[3-hydroxymyristoyl] N-acetylglucosamine deacetylase                                                  | 87097.9919 | -0.4514577 | 0.0842447  | -5.358886  | 4.76E-07   |
| Ureidoglycine aminohydrolase                                                                                  | 1623.74953 | -0.4519473 | 0.10975124 | -4.1179244 | 0.00015123 |
| 4-hydroxy-3-methylbut-2-enyl diphosphate reductase                                                            | 4465.85842 | -0.4519569 | 0.08941053 | -5.0548508 | 2.27E-06   |
| CMP-Kdo synthetase%2C KpsU                                                                                    | 3266.25406 | -0.4520863 | 0.14360442 | -3.1481364 | 0.00471994 |
| YbbI ABC transporter ATP-binding protein                                                                      | 870.537    | -0.4528619 | 0.15095423 | -2.999995  | 0.00732394 |
| DNA-damage-inducible protein D                                                                                | 3737.56793 | -0.4539219 | 0.10017657 | -4.5312178 | 2.69E-05   |
| Response regulator of zinc sigma-54-dependent two-component system                                            | 1193.80469 | -0.4543903 | 0.11227702 | -4.0470465 | 0.0002028  |
| Molybdenum ABC transporter%2C periplasmic molybdenum-binding protein ModA (TC 3.A.1.8.1)                      | 24706.9082 | -0.4545053 | 0.11599703 | -3.9182492 | 0.00033558 |
| FIG00639301: hypothetical protein                                                                             | 712.21457  | -0.4565101 | 0.15238221 | -2.9958225 | 0.0074079  |
| Peptidyl-prolyl cis-trans isomerase PpiB                                                                      | 3385.7517  | -0.4570914 | 0.108374   | -4.2177219 | 0.00010135 |
| FIG002958: hypothetical protein                                                                               | 886.161149 | -0.4583026 | 0.11081731 | -4.1356592 | 0.00014107 |
| Capsular polysaccharide export system periplasmic protein KpsD                                                | 6624.18146 | -0.4583811 | 0.14707656 | -3.1166158 | 0.00517946 |
| FIG00637900: hypothetical protein                                                                             | 6094.20834 | -0.4589453 | 0.15212025 | -3.0169903 | 0.00698159 |
| LSU ribosomal protein L22p (L17e)                                                                             | 11035.4277 | -0.4589498 | 0.13235728 | -3.4675071 | 0.00167131 |
| FIG00639460: hypothetical protein                                                                             | 573.992841 | -0.4597091 | 0.15057741 | -3.0529753 | 0.00629831 |
| Iron(III) citrate transport system%2C periplasmic iron-binding protein FecB (TC 3.A.1.14.1)                   | 4113.7456  | -0.4603724 | 0.10773281 | -4.2732793 | 8.04E-05   |
| Putative DNA processing chain A                                                                               | 1040.27484 | -0.4608282 | 0.09401933 | -4.9014197 | 4.80E-06   |
| Molybdopterin biosynthesis Mog protein%2Cmolybdochelataase                                                    | 2229.74779 | -0.4610389 | 0.08454615 | -5.4531027 | 2.85E-07   |
| DNA primase                                                                                                   | 227.485165 | -0.4622214 | 0.18608035 | -2.4839884 | 0.02965035 |
| Glycosyl hydrolase YegX%2C family 25                                                                          | 550.017244 | -0.4634609 | 0.19846498 | -2.3352277 | 0.04230937 |
| HtrA suppressor protein                                                                                       | 307.596201 | -0.4666578 | 0.16425395 | -2.8410749 | 0.01152297 |
| Phage tail assembly protein                                                                                   | 488.321739 | -0.4667776 | 0.17697946 | -2.6374675 | 0.02003766 |
| Enterobactin synthetase component F%2C serine activating enzyme                                               | 286044.565 | -0.4674963 | 0.09253864 | -5.0519031 | 2.30E-06   |
| Mobile element protein                                                                                        | 120.03684  | -0.4698777 | 0.17696548 | -2.655194  | 0.01913227 |
| FIG00639383: hypothetical protein                                                                             | 283.629433 | -0.4699463 | 0.15197736 | -3.0922124 | 0.00558473 |
| Putative oxidoreductase                                                                                       | 3734.53145 | -0.4703535 | 0.10798095 | -4.3558934 | 5.67E-05   |
| FIG01047911: hypothetical protein                                                                             | 641.470189 | -0.4703724 | 0.11270884 | -4.1733403 | 0.00012086 |
| MchD protein                                                                                                  | 2243.11537 | -0.4709233 | 0.16627164 | -2.8322526 | 0.01182656 |
| Protein ydJ A                                                                                                 | 3368.74144 | -0.4709917 | 0.12450755 | -3.7828363 | 0.00055195 |
| Methylglyoxal synthase                                                                                        | 3268.20798 | -0.4717094 | 0.10730838 | -4.3958301 | 4.79E-05   |
| Mlc%2C transcriptional repressor of MalT (the transcriptional activator of maltose regulon) and manXYZ operon | 1071.92371 | -0.4725245 | 0.13486029 | -3.5038074 | 0.00148218 |
| hypothetical protein                                                                                          | 324.87586  | -0.472536  | 0.16554602 | -2.8544089 | 0.01109829 |
| Transcriptional regulator%2C LacI family                                                                      | 2390.40486 | -0.4729113 | 0.11069269 | -4.2722907 | 8.07E-05   |
| N-acetylmuramic acid 6-phosphate etherase                                                                     | 820.860181 | -0.4735778 | 0.09370171 | -5.0541004 | 2.28E-06   |
| Methyl-accepting chemotaxis protein II (aspartate chemoreceptor protein)                                      | 23040.0907 | -0.4737204 | 0.11666938 | -4.0603662 | 0.00019205 |
| 2-Keto-3-deoxy-D-manno-octulosonate-8-phosphate synthase                                                      | 11061.7309 | -0.4737644 | 0.06608328 | -7.1692015 | 7.21E-12   |
| Mediator of hyperadherence YidE                                                                               | 1060.17007 | -0.4740934 | 0.13923798 | -3.404914  | 0.00206954 |
| Ascorbate utilization transcriptional regulator UlaR%2C HTH-type                                              | 732.906229 | -0.4746337 | 0.10789468 | -4.3990465 | 4.72E-05   |
| Transport ATP-binding protein CydC                                                                            | 4460.87424 | -0.4746821 | 0.08824567 | -5.3790976 | 4.26E-07   |
| FIG003276: zinc-binding protein                                                                               | 580.661343 | -0.475268  | 0.11472613 | -4.1426308 | 0.00013708 |
| Glucosamine--fructose-6-phosphate aminotransferase [isomerizing]                                              | 13851.4019 | -0.4756932 | 0.07833372 | -6.0726495 | 8.78E-09   |
| Bis[5'-nucleosyl]-tetraphosphatase%2C symmetrical                                                             | 3668.67905 | -0.4758718 | 0.10542281 | -4.5139356 | 2.91E-05   |
| Ribonuclease Z                                                                                                | 306.576666 | -0.4774074 | 0.14869066 | -3.2107424 | 0.00387592 |
| Arabinose operon regulatory protein                                                                           | 2083.8588  | -0.4775154 | 0.10451829 | -4.568726  | 2.26E-05   |

|                                                                                                                                     |            |            |            |            |            |
|-------------------------------------------------------------------------------------------------------------------------------------|------------|------------|------------|------------|------------|
| Sensor protein torS                                                                                                                 | 778.743386 | -0.4777958 | 0.13290989 | -3.5948856 | 0.0010843  |
| S-adenosylmethionine decarboxylase proenzyme                                                                                        | 4064.66937 | -0.4785076 | 0.16375188 | -2.9221504 | 0.00916727 |
| Cytochrome c-type biogenesis protein CcmC%2Cputative heme lyase for CcmE                                                            | 129.117235 | -0.4785705 | 0.18795225 | -2.5462343 | 0.0253403  |
| tRNA (Guanine37-N1)-methyltransferase                                                                                               | 18174.5618 | -0.4788255 | 0.1358483  | -3.5247076 | 0.00138229 |
| Exodeoxyribonuclease V alpha chain                                                                                                  | 2450.77665 | -0.4789626 | 0.08475536 | -5.6511185 | 9.76E-08   |
| Transcriptional [co]regulator CytR                                                                                                  | 1762.3114  | -0.4790587 | 0.09393534 | -5.0998771 | 1.82E-06   |
| Polyferredoxin NapH (periplasmic nitrate reductase)                                                                                 | 78.1012794 | -0.4794911 | 0.20729466 | -2.3130896 | 0.04441119 |
| Riboflavin synthase eubacterial/eukaryotic                                                                                          | 4126.78363 | -0.4797094 | 0.1261824  | -3.8017141 | 0.00051659 |
| Outer membrane protein H precursor                                                                                                  | 23397.6032 | -0.4798138 | 0.13287058 | -3.6111367 | 0.00102581 |
| hypothetical protein                                                                                                                | 1529.34286 | -0.4802717 | 0.10320151 | -4.6537277 | 1.55E-05   |
| ABC transporter%2C periplasmic substrate-binding protein YnjB                                                                       | 789.444579 | -0.4821    | 0.12070583 | -3.9940075 | 0.0002509  |
| Cystathionine beta-lyase                                                                                                            | 1284.32814 | -0.482689  | 0.10870169 | -4.4404919 | 3.98E-05   |
| Fructose-1%2C6-bisphosphatase%2C type I                                                                                             | 7890.05491 | -0.4837766 | 0.07224187 | -6.6966234 | 1.82E-10   |
| Iron(III) dicitrate transport protein FecA                                                                                          | 15653.4818 | -0.4840072 | 0.12850542 | -3.7664345 | 0.00058684 |
| Putative transport protein                                                                                                          | 194.371061 | -0.4851756 | 0.16357836 | -2.9660131 | 0.00807744 |
| Transcription-repair coupling factor                                                                                                | 7508.85603 | -0.4855394 | 0.11575108 | -4.1946858 | 0.00011116 |
| Putative transport protein YdjK%2C MFS superfamily                                                                                  | 76.892217  | -0.4872058 | 0.20188072 | -2.4133347 | 0.03525899 |
| TorCAD operon transcriptional regulatory protein TorR                                                                               | 609.840314 | -0.4873402 | 0.10891167 | -4.4746367 | 3.45E-05   |
| FMN-dependent NADH-azoreductase                                                                                                     | 1463.87565 | -0.4880808 | 0.09901894 | -4.9291661 | 4.21E-06   |
| Penicillin-binding protein AmpH                                                                                                     | 1839.90298 | -0.4882716 | 0.07741782 | -6.306967  | 2.13E-09   |
| Holliday junction DNA helicase RuvB                                                                                                 | 3272.75552 | -0.4894642 | 0.07840331 | -6.2429024 | 3.13E-09   |
| Periplasmic nitrate reductase precursor                                                                                             | 358.650724 | -0.4899175 | 0.16510398 | -2.9673268 | 0.00804756 |
| Capsular polysaccharide export system protein KpsC                                                                                  | 5854.55923 | -0.4900625 | 0.17055979 | -2.8732595 | 0.01052583 |
| FIG00640332: hypothetical protein                                                                                                   | 127.164392 | -0.4902008 | 0.21150259 | -2.3177059 | 0.04396974 |
| ABC-type multidrug transport system%2C permease component                                                                           | 2952.67401 | -0.4908989 | 0.11285851 | -4.3496842 | 5.82E-05   |
| Glutathione S-transferase                                                                                                           | 4511.97447 | -0.4919468 | 0.11198041 | -4.393151  | 4.84E-05   |
| TIORF127 protein                                                                                                                    | 354.806725 | -0.4919508 | 0.12971643 | -3.7925099 | 0.0005341  |
| SSU ribosomal protein S3p (S3e)                                                                                                     | 33795.3096 | -0.4930963 | 0.10700551 | -4.6081395 | 1.90E-05   |
| Threonyl-tRNA synthetase                                                                                                            | 92360.4817 | -0.4951913 | 0.1146257  | -4.3200722 | 6.60E-05   |
| Formamidopyrimidine-DNA glycosylase                                                                                                 | 604.634534 | -0.4972245 | 0.11341452 | -4.3841344 | 5.03E-05   |
| Xanthine and CO dehydrogenases maturation factor%2CXdhC/CoxF family / Selenium-dependent molybdenum hydroxylase system protein YqeB | 409.242346 | -0.4978564 | 0.14054556 | -3.5423129 | 0.00130221 |
| Iron(III) dicitrate transport system permease protein FecD (TC 3.A.1.14.1)                                                          | 918.825414 | -0.4986666 | 0.11507966 | -4.3332301 | 6.25E-05   |
| Uncharacterized sigma-54-dependent transcriptional regulator YgeV                                                                   | 823.236606 | -0.5004602 | 0.14277622 | -3.5052068 | 0.00147642 |
| Glycerol dehydrogenase                                                                                                              | 17512.7792 | -0.5008253 | 0.10285621 | -4.8691792 | 5.60E-06   |
| Phage DNA-packaging protein                                                                                                         | 388.082906 | -0.5008703 | 0.17055574 | -2.936696  | 0.00879222 |
| FIG003671: Metal-dependent hydrolase                                                                                                | 82.9734432 | -0.501141  | 0.20827805 | -2.4061151 | 0.03581163 |
| SSU ribosomal protein S16p                                                                                                          | 2445.46368 | -0.5024363 | 0.17085769 | -2.9406712 | 0.00869479 |
| Capsular polysaccharide export system protein KpsF                                                                                  | 10152.441  | -0.5027394 | 0.11297362 | -4.4500601 | 3.83E-05   |
| Dipeptidyl carboxypeptidase Dcp                                                                                                     | 3758.85244 | -0.5029956 | 0.11359666 | -4.4279084 | 4.21E-05   |
| Glucokinase                                                                                                                         | 2103.58563 | -0.5032149 | 0.07757556 | -6.4867677 | 6.94E-10   |
| Methionine ABC transporter ATP-binding protein                                                                                      | 6189.37643 | -0.5039581 | 0.10661797 | -4.7267649 | 1.10E-05   |
| LSU ribosomal protein L16p (L10e)                                                                                                   | 18696.9938 | -0.5045653 | 0.1032056  | -4.8889336 | 5.09E-06   |
| hypothetical protein                                                                                                                | 302.911221 | -0.5049905 | 0.1911016  | -2.6425235 | 0.01977235 |
| Adenylosuccinate lyase                                                                                                              | 4942.58974 | -0.5055886 | 0.13324126 | -3.7945344 | 0.00053048 |
| FIG002842: hypothetical protein                                                                                                     | 2474.9509  | -0.5063496 | 0.10405014 | -4.8664001 | 5.67E-06   |
| Aerotaxis sensor receptor protein                                                                                                   | 1996.95781 | -0.5063611 | 0.13077977 | -3.8718608 | 0.00039796 |
| LSU ribosomal protein L11p (L12e)                                                                                                   | 9784.08794 | -0.5064133 | 0.13925685 | -3.6365415 | 0.00093645 |
| hypothetical protein                                                                                                                | 2060.79711 | -0.5071157 | 0.11618968 | -4.3645499 | 5.47E-05   |
| Putative cytoplasmic protein                                                                                                        | 1005.76985 | -0.5076572 | 0.16767222 | -3.0276766 | 0.00676285 |
| Putative ACR protein                                                                                                                | 705.979496 | -0.508784  | 0.16583308 | -3.0680486 | 0.00600677 |
| Tyrosyl-tRNA synthetase                                                                                                             | 8411.55489 | -0.5093193 | 0.08355678 | -6.0954875 | 7.66E-09   |
| Ribonucleotide reductase of class Ia (aerobic)%2Cbeta subunit                                                                       | 4606.18513 | -0.5103178 | 0.11669791 | -4.3729815 | 5.28E-05   |
| HigA protein (antitoxin to HigB)                                                                                                    | 707.123985 | -0.5129284 | 0.11306673 | -4.5365101 | 2.62E-05   |
| Protein yIfE                                                                                                                        | 1321.44679 | -0.5134958 | 0.14602547 | -3.5164812 | 0.0014229  |
| FIG004064: hypothetical protein                                                                                                     | 4625.60282 | -0.5139996 | 0.11683823 | -4.3992414 | 4.72E-05   |
| Phosphoglucosamine mutase                                                                                                           | 9629.23157 | -0.5141156 | 0.11415319 | -4.5037337 | 3.04E-05   |
| Bacteriophage N4 adsorption protein A                                                                                               | 2329.037   | -0.5146692 | 0.10641129 | -4.836603  | 6.55E-06   |
| Outer membrane vitamin B12 receptor BtuB                                                                                            | 8545.61909 | -0.5153964 | 0.13383546 | -3.85097   | 0.00043081 |
| FIG00640016: hypothetical protein                                                                                                   | 669.879632 | -0.5160682 | 0.1419084  | -3.636629  | 0.00093645 |
| Hydrogenase-2 large chain precursor                                                                                                 | 2334.17481 | -0.5173788 | 0.13085317 | -3.9538882 | 0.00029289 |
| Transcriptional regulator SlyA                                                                                                      | 1835.25365 | -0.5184043 | 0.13208207 | -3.9248649 | 0.00032532 |
| Acetoacetate metabolism regulatory protein AtoC                                                                                     | 179.230368 | -0.5186723 | 0.16666148 | -3.1121308 | 0.00525252 |
| Dihydropteroate synthase                                                                                                            | 1254.15607 | -0.5190929 | 0.11581451 | -4.4821054 | 3.34E-05   |
| Branched-chain amino acid ABC transporter%2C amino acid-binding protein (TC 3.A.1.4.1)                                              | 1353.61729 | -0.5191631 | 0.15316395 | -3.3895908 | 0.00217866 |
| 2-amino-3-ketobutyrate coenzyme A ligase                                                                                            | 13651.1423 | -0.5194126 | 0.10630762 | -4.8859397 | 5.16E-06   |
| Putative transcriptional regulator of sorbose uptake and utilization genes                                                          | 335.138127 | -0.5215198 | 0.12810688 | -4.0709742 | 0.00018381 |
| 3-hydroxydecanoyl-[ACP] dehydratase                                                                                                 | 1062.58846 | -0.522801  | 0.13311916 | -3.9273161 | 0.00032272 |
| Phosphodiesterase yfC                                                                                                               | 961.783167 | -0.5235924 | 0.1175027  | -4.456003  | 3.73E-05   |
| FrmR: Negative transcriptional regulator of formaldehyde detoxification operon                                                      | 505.600498 | -0.5249336 | 0.13493694 | -3.890214  | 0.00037135 |
| L-fucose mutarotase                                                                                                                 | 3809.67486 | -0.5260364 | 0.09923652 | -5.3008351 | 6.51E-07   |
| PTS system%2C glucose-specific IIA component                                                                                        | 19080.9816 | -0.5273279 | 0.11358432 | -4.6426116 | 1.62E-05   |
| Dihydrodipicolinate synthase                                                                                                        | 6262.60804 | -0.5275699 | 0.12558764 | -4.2008107 | 0.00010838 |
| Protein-N(5)-glutamine methyltransferase PrmB%2Cmethylates LSU ribosomal protein L3p                                                | 9259.54564 | -0.5286671 | 0.08610131 | -6.1400583 | 5.89E-09   |
| LSU ribosomal protein L13p (L13Ae)                                                                                                  | 9392.62939 | -0.5292344 | 0.10040222 | -5.2711428 | 7.61E-07   |
| Mannitol-1-phosphate 5-dehydrogenase                                                                                                | 2658.40689 | -0.5295694 | 0.08928631 | -5.9311369 | 1.99E-08   |
| DNA gyrase inhibitory protein                                                                                                       | 617.099748 | -0.5297689 | 0.13386144 | -3.9575917 | 0.00028864 |
| L-lysine 6-monoxygenase [NADPH]                                                                                                     | 139483.052 | -0.5311288 | 0.11817663 | -4.494364  | 3.17E-05   |
| ErpA%2C essential respiratory protein A / probable iron binding protein from the HesB_IscA_SufA family                              | 5851.94694 | -0.5323746 | 0.13797031 | -3.858617  | 0.00041852 |
| Hydroxyethylthiazole kinase                                                                                                         | 6565.41323 | -0.532825  | 0.13949471 | -3.819679  | 0.00048369 |
| DUF1706 domain-containing protein                                                                                                   | 4300.91571 | -0.5335436 | 0.10424987 | -5.1179312 | 1.67E-06   |
| FIG00638396: hypothetical protein                                                                                                   | 1228.21598 | -0.5341966 | 0.17484144 | -3.0553204 | 0.00625294 |
| Exonuclease SbcD                                                                                                                    | 667.041063 | -0.5343666 | 0.14036254 | -3.8070457 | 0.00050752 |
| Hypothetical zinc-type alcohol dehydrogenase-like protein YdjI                                                                      | 84.694312  | -0.53511   | 0.18907427 | -2.8301575 | 0.01189785 |
| N-acetylmannosamine kinase                                                                                                          | 108.859999 | -0.5359963 | 0.22928995 | -2.3376352 | 0.04207637 |
| Methionine aminopeptidase                                                                                                           | 9832.50247 | -0.5363208 | 0.08978363 | -5.9734804 | 1.55E-08   |
| Maltodextrin glucosidase                                                                                                            | 1540.25758 | -0.536794  | 0.11429439 | -4.6965912 | 1.27E-05   |
| Mobile element protein                                                                                                              | 303.607557 | -0.5382769 | 0.12115187 | -4.442993  | 3.94E-05   |
| Excinuclease ABC subunit A                                                                                                          | 36502.1678 | -0.5387039 | 0.10656372 | -5.0552282 | 2.27E-06   |
| Nitrate/nitrite sensor protein                                                                                                      | 764.767813 | -0.5391063 | 0.13443685 | -4.0101079 | 0.00023574 |
| DNA repair protein RecN                                                                                                             | 13604.9287 | -0.5394997 | 0.08645189 | -6.2404617 | 3.18E-09   |
| Protein ydgH precursor                                                                                                              | 5026.57596 | -0.5395376 | 0.07850348 | -6.8727857 | 5.66E-11   |
| FIG00638797: hypothetical protein                                                                                                   | 2433.17171 | -0.5400839 | 0.12287876 | -4.3952583 | 4.79E-05   |
| FIG00639029: hypothetical protein                                                                                                   | 357.682568 | -0.5408283 | 0.18857838 | -2.8679232 | 0.01068161 |
| Chromosome segregation ATPase                                                                                                       | 7268.51676 | -0.5410518 | 0.13628769 | -3.9699243 | 0.00027586 |
| Erythritol transcriptional regulator EryD                                                                                           | 4812.48045 | -0.5412535 | 0.08775529 | -6.1677595 | 4.97E-09   |
| FIG002208: Acetyltransferase                                                                                                        | 1879.76104 | -0.5417021 | 0.12807451 | -4.2295853 | 9.64E-05   |
| Putative inner membrane protein                                                                                                     | 3144.22697 | -0.5471028 | 0.12217927 | -4.4778694 | 3.40E-05   |
| Type I restriction-modification system%2CDNA-methyltransferase subunit M                                                            | 2098.15473 | -0.5472134 | 0.12275317 | -4.4578356 | 3.71E-05   |
| Inosine-uridine preferring nucleoside hydrolase                                                                                     | 392.046626 | -0.5472169 | 0.14189336 | -3.8565366 | 0.00042177 |
| Fumarate respiration transcriptional regulator DcuR                                                                                 | 1060.32429 | -0.5473051 | 0.11171984 | -4.8989069 | 4.86E-06   |
| Proteinase inhibitor I1%2C ecotin precursor                                                                                         | 1077.57193 | -0.5484334 | 0.08068905 | -6.7968751 | 9.31E-11   |
| Putative transporting ATPase                                                                                                        | 706.206567 | -0.5489009 | 0.14912366 | -3.6808437 | 0.00080043 |
| Quinolinate phosphoribosyltransferase [decarboxylating]                                                                             | 2580.41858 | -0.5498884 | 0.08703478 | -6.3180307 | 1.99E-09   |
| Transcriptional repressor of the lac operon                                                                                         | 1355.84104 | -0.5508021 | 0.11256139 | -4.8933489 | 4.98E-06   |
| entry exclusion protein 2                                                                                                           | 1490.89522 | -0.5512349 | 0.12374818 | -4.454489  | 3.75E-05   |
| FIG001826: putative inner membrane protein                                                                                          | 167.756387 | -0.5521086 | 0.16804259 | -3.2855279 | 0.00305568 |
| Phage portal protein                                                                                                                | 428.141828 | -0.55251   | 0.17701335 | -3.12129   | 0.00510712 |

|                                                                                                     |            |            |             |            |            |
|-----------------------------------------------------------------------------------------------------|------------|------------|-------------|------------|------------|
| Ribonucleotide reductase of class Ia (aerobic)%2Ca1pha subunit                                      | 5551.17648 | -0.5525486 | 0.12686074  | -4.355552  | 5.67E-05   |
| Head-tail preconnector protein GP5                                                                  | 2435.35773 | -0.553364  | 0.18072041  | -3.0619896 | 0.0061888  |
| Fur regulated protein ORF x171.28                                                                   | 197.843376 | -0.5552938 | 0.18798159  | -2.9539798 | 0.00835192 |
| entry exclusion protein 2                                                                           | 834.667474 | -0.5568993 | 0.13375299  | -4.1636401 | 0.0001259  |
| Transcriptional activator of maltose regulon%2CMalT                                                 | 5963.24059 | -0.5588519 | 0.10937053  | -5.1097121 | 1.74E-06   |
| Flavohemoprotein (Hemoglobin-like protein) (Flavohemoglobin) (Nitric oxide dioxygenase)             | 1126.08788 | -0.5618573 | 0.12745896  | -4.4081428 | 4.56E-05   |
| Ferredoxin reductase                                                                                | 928.931979 | -0.5622011 | 0.10326252  | -5.4443866 | 2.99E-07   |
| Phosphoanhydride phosphohydrolase                                                                   | 810.741998 | -0.5630996 | 0.13009986  | -4.3282105 | 6.37E-05   |
| Phosphomethylpyrimidine kinase                                                                      | 5062.35669 | -0.5641394 | 0.14362187  | -3.927949  | 0.00032245 |
| SSU ribosomal protein S19p (S15e)                                                                   | 3507.0428  | -0.566943  | 0.13066978  | -4.3387463 | 6.10E-05   |
| S-(hydroxymethyl)glutathione dehydrogenase                                                          | 4508.01248 | -0.5675033 | 0.10956961  | -5.179386  | 1.22E-06   |
| hypothetical protein                                                                                | 165.384667 | -0.5675972 | 0.18045508  | -3.1453656 | 0.00475621 |
| Carbon starvation protein A                                                                         | 13107.6434 | -0.5685966 | 0.11711199  | -4.8551523 | 6.00E-06   |
| Cys-tRNA(Pro) deacylase YbaK                                                                        | 1019.35765 | -0.5691285 | 0.10473131  | -5.434177  | 3.16E-07   |
| Aspartokinase                                                                                       | 4104.36463 | -0.5699102 | 0.18423798  | -3.0933372 | 0.00557023 |
| Fumarate reductase subunit D                                                                        | 1030.50564 | -0.5700543 | 0.11365425  | -5.0156883 | 2.75E-06   |
| Pyrroline-5-carboxylate reductase                                                                   | 3349.50432 | -0.5712518 | 0.0964613   | -5.9220835 | 2.09E-08   |
| Putative permease PerM (%3D YfgO)                                                                   | 889.997444 | -0.5727061 | 0.11907949  | -4.8094439 | 7.44E-06   |
| Nickel transport ATP-binding protein NikD (TC 3.A.1.5.3)                                            | 49.1094886 | -0.574093  | 0.23315311  | -2.4623006 | 0.03129418 |
| Acetolactate synthase large subunit                                                                 | 5429.01021 | -0.5753006 | 0.08689265  | -6.6208193 | 2.95E-10   |
| YjID protein                                                                                        | 223.133089 | -0.5756165 | 0.16750022  | -3.4365117 | 0.001861   |
| Multidrug resistance protein D                                                                      | 545.239569 | -0.5759044 | 0.12884181  | -4.4698566 | 3.52E-05   |
| hypothetical protein                                                                                | 1819.3547  | -0.5779523 | 0.10786288  | -5.3582136 | 4.77E-07   |
| Methylglyoxal reductase%2C acetol producing                                                         | 111.813246 | -0.5781043 | 0.21353617  | -2.7072896 | 0.01671498 |
| PTS system%2C fructose-specific IIB component                                                       | 5216.31723 | -0.5784728 | 0.14207419  | -4.071625  | 0.00018345 |
| Dihydrodipicolinate synthase                                                                        | 374.982389 | -0.5826521 | 0.10518841  | -5.5391278 | 1.78E-07   |
| LrgA-associated membrane protein LrgB                                                               | 1978.47082 | -0.5832103 | 0.21601419  | -2.6998703 | 0.01703909 |
| 6-phosphofructokinase                                                                               | 25614.2684 | -0.5835663 | 0.07778904  | -7.5019088 | 6.60E-13   |
| FIG01200701: hypothetical protein                                                                   | 511.264136 | -0.583653  | 0.18009352  | -3.2408327 | 0.00351744 |
| PTS system%2C fructose-specific IIB component                                                       | 199.34071  | -0.5838665 | 0.13217528  | -4.4173657 | 4.40E-05   |
| Holliday junction DNA helicase RuvA                                                                 | 2101.0414  | -0.5840377 | 0.09557186  | -6.1109793 | 6.98E-09   |
| FIG00638471: hypothetical protein                                                                   | 1995.99233 | -0.5851605 | 0.13200375  | -4.432908  | 4.11E-05   |
| Non-specific DNA-binding protein Dps / Iron-binding ferritin-like antioxidant protein / Ferroxidase | 10756.2503 | -0.5852385 | 0.12196535  | -4.7983999 | 7.86E-06   |
| DUF1706 domain-containing protein                                                                   | 7065.72547 | -0.5860386 | 0.19566564  | -2.9951021 | 0.00742118 |
| Ferrous iron transport protein A                                                                    | 3754.79905 | -0.5863397 | 0.13289269  | -4.4121287 | 4.49E-05   |
| Ribosyl nicotinamide transporter%2C PnuC-like                                                       | 33778.2906 | -0.5866094 | 0.08304701  | -7.0635821 | 1.52E-11   |
| D-Lactate dehydrogenase                                                                             | 11885.1133 | -0.587441  | 0.09308523  | -6.3107867 | 2.08E-09   |
| Putative transport protein                                                                          | 1031.53021 | -0.5900648 | 0.10614898  | -5.5588364 | 1.60E-07   |
| Cytochrome c-type biogenesis protein CcmE%2C heme chaperone                                         | 146.387475 | -0.5914203 | 0.1655527   | -3.5723992 | 0.0011719  |
| Accessory protein YqeC in selenium-dependent molybdenum hydroxylase maturation                      | 78.9338204 | -0.5916393 | 0.20349843  | -2.9073406 | 0.00955945 |
| Ferredoxin reductase                                                                                | 1129.68803 | -0.5917884 | 0.11846114  | -4.995633  | 3.04E-06   |
| Glucose-6-phosphate 1-dehydrogenase                                                                 | 9540.69505 | -0.5940164 | 0.09287846  | -6.3956313 | 1.24E-09   |
| Putative transport system permease protein                                                          | 405.132917 | -0.5957536 | 0.12104475  | -4.9217636 | 4.36E-06   |
| Ferrous iron transport peroxidase EfeB                                                              | 18020.561  | -0.5958808 | 0.15673362  | -3.8018701 | 0.00051659 |
| Putative minor tail protein                                                                         | 972.191993 | -0.5975803 | 0.17676688  | -3.3806124 | 0.00223493 |
| Prolyl-tRNA synthetase                                                                              | 13291.7549 | -0.5981949 | 0.09459244  | -6.3239185 | 1.93E-09   |
| FIG00639467: hypothetical protein                                                                   | 377.001588 | -0.599287  | 0.15844008  | -3.7824206 | 0.00055246 |
| Phosphoserine aminotransferase                                                                      | 21416.0286 | -0.6003754 | 0.08359822  | -7.1816767 | 6.66E-12   |
| Glutathionylspermidine synthase                                                                     | 16954.8424 | -0.6004704 | 0.09831551  | -6.1075857 | 7.12E-09   |
| Probable lipoprotein                                                                                | 130.279924 | -0.60157   | 0.17038011  | -3.5307523 | 0.00135295 |
| 3-oxoacyl-[acyl-carrier protein] reductase                                                          | 2024.96428 | -0.6017974 | 0.09363071  | -6.4273507 | 1.01E-09   |
| Phage minor tail protein                                                                            | 155.938177 | -0.6035673 | 0.22637143  | -2.6662699 | 0.0185986  |
| COG0699: Predicted GTPases (dynamin-related)                                                        | 755.629367 | -0.6035707 | 0.09397075  | -6.4229638 | 1.04E-09   |
| RNA polymerase sigma factor RpoD                                                                    | 16498.6546 | -0.6039855 | 0.07580066  | -7.9680773 | 1.95E-14   |
| Glucitol operon repressor                                                                           | 367.183334 | -0.6071146 | 0.13184843  | -4.6046405 | 1.93E-05   |
| Transposase EC0136                                                                                  | 185.990575 | -0.6075486 | 0.17543919  | -3.4630156 | 0.0016949  |
| FIG00644994: hypothetical protein                                                                   | 4369.86925 | -0.6091182 | 0.107797    | -5.506604  | 9.76E-08   |
| FIG00642515: hypothetical protein                                                                   | 1488.49911 | -0.6092034 | 0.10691899  | -5.6978035 | 7.52E-08   |
| 2'-5' RNA ligase                                                                                    | 771.983591 | -0.6107706 | 0.10368865  | -5.8904286 | 2.51E-08   |
| Transaldolase                                                                                       | 345.839422 | -0.6108917 | 0.15486844  | -3.9445849 | 0.00030352 |
| Phage minor tail protein                                                                            | 120.440326 | -0.6114181 | 0.20092867  | -3.0429612 | 0.00648126 |
| Antiholin-like protein LrgA                                                                         | 742.6495   | -0.6116105 | 0.14648185  | -4.1753333 | 0.00011992 |
| Phage tail assembly                                                                                 | 713.0358   | -0.613624  | 0.16879448  | -3.635332  | 0.00094018 |
| 16 kDa heat shock protein B                                                                         | 630.274434 | -0.6140035 | 0.17328456  | -3.5433248 | 0.00129812 |
| Vitamin B12 ABC transporter%2C B12-binding component BtuF                                           | 1184.99019 | -0.6154026 | 0.15274663  | -4.028911  | 0.00021837 |
| HtrA protease/chaperone protein                                                                     | 17694.1874 | -0.6173889 | 0.09268019  | -6.6614986 | 2.29E-10   |
| Capsular polysaccharide export system protein KpsS                                                  | 951.302347 | -0.6176979 | 0.18774635  | -3.2900664 | 0.00301064 |
| Intergenic-region protein                                                                           | 239.633069 | -0.619148  | 0.16963762  | -3.6498271 | 0.00089574 |
| FIG00637865: hypothetical protein                                                                   | 1374.40549 | -0.6208781 | 0.20422594  | -3.0401531 | 0.00653055 |
| DNA polymerase III epsilon subunit                                                                  | 2877.67808 | -0.6211801 | 0.09355811  | -6.6395114 | 2.63E-10   |
| Putative phage protein                                                                              | 62.0301325 | -0.6212931 | 0.25116918  | -2.473604  | 0.03043812 |
| Predicted glutamine amidotransferase                                                                | 4199.66859 | -0.6228765 | 0.10150527  | -6.1363962 | 6.01E-09   |
| Spermidine synthase                                                                                 | 4179.86898 | -0.6239152 | 0.12873914  | -4.8463521 | 6.26E-06   |
| 3-demethylubiquinone-9 3-methyltransferase                                                          | 375.080056 | -0.6253969 | 0.12977439  | -4.8191085 | 7.11E-06   |
| Putative membrane protein YeiH                                                                      | 372.552848 | -0.6259942 | 0.121127594 | -5.1617343 | 1.34E-06   |
| OsmC/Ohr family protein                                                                             | 540.724382 | -0.626139  | 0.13969341  | -4.4822373 | 3.34E-05   |
| Cell division protein FtsZ                                                                          | 51944.9713 | -0.6269096 | 0.11949897  | -5.2461505 | 8.63E-07   |
| FIG00361523: hypothetical protein                                                                   | 3897.38635 | -0.6270525 | 0.08205957  | -7.6414301 | 2.39E-13   |
| Phosphogluconate repressor HexR%2C RpIr family                                                      | 631.812195 | -0.6288155 | 0.12585342  | -4.9964118 | 3.03E-06   |
| Sigma cross-reacting protein 27A                                                                    | 3920.44544 | -0.6302659 | 0.10298138  | -6.1201932 | 6.62E-09   |
| Transcriptional regulatory protein RtcR                                                             | 305.327153 | -0.6304822 | 0.16611312  | -3.7954989 | 0.00052891 |
| Ribosome recycling factor                                                                           | 15187.9073 | -0.6311384 | 0.07144842  | -8.833483  | 1.54E-17   |
| Porphobilinogen synthase                                                                            | 8926.48944 | -0.6312425 | 0.09481986  | -6.6572808 | 2.35E-10   |
| Z1226 protein                                                                                       | 103.009673 | -0.6321083 | 0.17543422  | -3.6031075 | 0.00105354 |
| Fructuronate transporter GntP                                                                       | 153.247327 | -0.6321382 | 0.16457533  | -3.8410264 | 0.00044691 |
| Ribonuclease E inhibitor RraB                                                                       | 2897.27743 | -0.6329538 | 0.12484646  | -5.0698579 | 2.11E-06   |
| COG1649 predicted glycoside hydrolase                                                               | 705.072632 | -0.6344519 | 0.13180965  | -4.8133952 | 7.31E-06   |
| FIG00639173: hypothetical protein                                                                   | 806.068854 | -0.6352641 | 0.14563815  | -4.3619344 | 5.52E-05   |
| Aerobic C4-dicarboxylate transporter for fumarate%2C L-malate%2C D-malate%2C succinate%2C aspartate | 653.595476 | -0.6376153 | 0.19557856  | -3.2601494 | 0.00330913 |
| FKBP-type peptidyl-prolyl cis-trans isomerase SlpA                                                  | 2288.79927 | -0.6378566 | 0.10202516  | -6.2519538 | 2.96E-09   |
| Putative amidohydrolase                                                                             | 480.334776 | -0.6384275 | 0.12117509  | -5.2686361 | 7.70E-07   |
| Phage capsid and scaffold                                                                           | 550.749376 | -0.6405219 | 0.16630298  | -3.8515357 | 0.00043015 |
| Sodium:dicarboxylate symporter                                                                      | 19012.3499 | -0.640829  | 0.09196619  | -6.9680931 | 2.95E-11   |
| UPF0246 protein YaaA                                                                                | 1453.58823 | -0.6410915 | 0.11372265  | -5.6373245 | 1.05E-07   |
| Isoleucyl-tRNA synthetase                                                                           | 54149.0254 | -0.6412874 | 0.08794885  | -7.2915947 | 3.01E-12   |
| Sorbitol-6-phosphate 2-dehydrogenase                                                                | 111.177077 | -0.6413636 | 0.1708843   | -3.7532038 | 0.00061686 |
| Ni/Fe-hydrogenase 2 B-type cytochrome subunit                                                       | 562.208631 | -0.6415966 | 0.19623619  | -3.269512  | 0.00321771 |
| Adenylate kinase                                                                                    | 7079.1485  | -0.6420282 | 0.1128741   | -5.6880024 | 7.94E-08   |
| Formate dehydrogenase N gamma subunit                                                               | 196.312119 | -0.6433647 | 0.16723809  | -3.8469986 | 0.00043684 |
| Inosine-uridine preferring nucleoside hydrolase                                                     | 411.859433 | -0.6468226 | 0.14109578  | -4.5842804 | 2.11E-05   |
| Sensory histidine kinase AtoS                                                                       | 146.994387 | -0.6469391 | 0.18604439  | -3.4773373 | 0.00161883 |
| Ribulokinase                                                                                        | 161.048649 | -0.647233  | 0.16323841  | -3.9649556 | 0.00028099 |
| UDP-sugar hydrolase                                                                                 | 7001.92043 | -0.649285  | 0.09466918  | -6.8584616 | 6.23E-11   |
| Translation initiation factor SUI1-related protein                                                  | 313.050622 | -0.6495874 | 0.1631889   | -3.9805859 | 0.00026485 |
| Putative cytoplasmic protein                                                                        | 281.822693 | -0.6538246 | 0.14008702  | -4.6672749 | 1.45E-05   |
| Phage tail assembly protein I                                                                       | 137.534383 | -0.6594467 | 0.23179963  | -2.8448999 | 0.01140404 |
| Dihydroliipoamide dehydrogenase of pyruvate dehydrogenase complex                                   | 144339.799 | -0.6612822 | 0.10957006  | -6.0352453 | 1.08E-08   |

|                                                                                                 |            |            |            |            |            |
|-------------------------------------------------------------------------------------------------|------------|------------|------------|------------|------------|
| 6-phosphogluconate dehydrogenase%2Cdecarboxylating                                              | 21843.3358 | -0.6615538 | 0.10457963 | -6.3258382 | 1.91E-09   |
| 3-oxoacyl-[ACP] reductase                                                                       | 2369.81713 | -0.6644401 | 0.15406392 | -4.3127561 | 6.79E-05   |
| Putative Nudix hydrolase YfD                                                                    | 1535.6492  | -0.6654783 | 0.0798262  | -8.3365897 | 1.02E-15   |
| Modulator of drug activity B                                                                    | 530.32887  | -0.6661292 | 0.13238966 | -5.0315803 | 2.55E-06   |
| FIG004614: Putative cytoplasmic protein                                                         | 509.640288 | -0.6671579 | 0.11035967 | -6.0453048 | 1.02E-08   |
| putative regulator PapX protein                                                                 | 1374.20067 | -0.6672172 | 0.12040616 | -5.5413877 | 1.76E-07   |
| Mannose-6-phosphate isomerase                                                                   | 1720.02268 | -0.6677546 | 0.1186438  | -5.6282301 | 1.10E-07   |
| Dihydroorotase                                                                                  | 1457.81439 | -0.6682734 | 0.12245064 | -5.4574925 | 2.79E-07   |
| Predicted dye-decolorizing peroxidase (DyP)%2CYeX-like subgroup                                 | 1255.77172 | -0.6708771 | 0.10791513 | -6.2167101 | 3.68E-09   |
| membrane protein yaiZ                                                                           | 319.677932 | -0.6718479 | 0.16295911 | -4.1228003 | 0.00014818 |
| Phage major capsid protein                                                                      | 1752.70801 | -0.6728946 | 0.17118616 | -3.9307769 | 0.00031893 |
| Protein export cytoplasm protein SecA ATPase RNA helicase (TC 3.A.5.1.1)                        | 22613.7524 | -0.6745093 | 0.09576828 | -7.0431389 | 1.76E-11   |
| Amidophosphoribosyltransferase                                                                  | 4159.94331 | -0.676398  | 0.13589757 | -4.9772631 | 3.33E-06   |
| Ribosome hibernation protein YfiA                                                               | 13170.6609 | -0.6764397 | 0.13152726 | -5.1429622 | 1.47E-06   |
| Ribose-phosphate pyrophosphokinase                                                              | 12487.8322 | -0.6767974 | 0.09906369 | -6.8319428 | 7.42E-11   |
| Glutamyl-tRNA synthetase                                                                        | 4538.544   | -0.6772251 | 0.09093869 | -7.4470507 | 9.86E-13   |
| Putative acetyltransferase                                                                      | 79.6554176 | -0.6774106 | 0.24010742 | -2.8212816 | 0.01219496 |
| Protein transcriptional regulator of unknown carbohydrate utilization cluster%2C GntR family    | 118.170678 | -0.6775519 | 0.20926484 | -3.2377721 | 0.00355318 |
| L-arabinose isomerase                                                                           | 367.004771 | -0.679353  | 0.11817864 | -5.7485265 | 5.68E-08   |
| COG2005: N-terminal domain of molybdenum-binding protein                                        | 2773.54489 | -0.6804642 | 0.13908776 | -4.8923368 | 5.00E-06   |
| Fumarate reductase subunit C                                                                    | 727.743438 | -0.6809939 | 0.10848344 | -6.2773998 | 2.54E-09   |
| Type I restriction-modification system%2Cspecificity subunit S                                  | 1185.15108 | -0.6828094 | 0.13442554 | -5.0794617 | 2.01E-06   |
| Respiratory nitrate reductase alpha chain                                                       | 1206.90988 | -0.6841978 | 0.17200068 | -3.9778785 | 0.00026723 |
| Nucleoside-specific channel-forming protein Tsx precursor                                       | 2421.4595  | -0.6883158 | 0.13028307 | -5.2832329 | 7.13E-07   |
| Tagatose 1%2C6-bisphosphate aldolase                                                            | 122.833584 | -0.6883388 | 0.18634101 | -3.6939738 | 0.0007652  |
| Putative ribokinese                                                                             | 156.49024  | -0.6885595 | 0.1557436  | -4.4211097 | 4.33E-05   |
| Uncharacterized GST-like protein yghU associated with glutathionylspermidine synthetase/amidase | 2670.66433 | -0.688909  | 0.11667564 | -5.9044802 | 2.32E-08   |
| putative lipoprotein                                                                            | 3407.90695 | -0.6893312 | 0.10200342 | -6.7579223 | 1.21E-10   |
| Putative membrane protein                                                                       | 1732.7865  | -0.6909647 | 0.14874971 | -4.6451497 | 1.61E-05   |
| 3-dehydro-L-gulonate 2-dehydrogenase                                                            | 87.8475687 | -0.692432  | 0.21190874 | -3.2675955 | 0.00323549 |
| Thymidine phosphorylase                                                                         | 10975.2719 | -0.6934548 | 0.08886277 | -7.8036597 | 6.92E-14   |
| Ferrous iron transport protein B                                                                | 42525.8652 | -0.6935257 | 0.11649218 | -5.9534102 | 1.74E-08   |
| Pyridoxamine 5'-phosphate oxidase                                                               | 1918.26669 | -0.6940127 | 0.08897245 | -7.8003108 | 7.09E-14   |
| Putative integral membrane protein                                                              | 2184.48493 | -0.6952693 | 0.11950526 | -5.1878972 | 3.79E-08   |
| GDDEF/EAL domain protein YhjH                                                                   | 2752.12066 | -0.6955458 | 0.09740829 | -7.1405199 | 8.83E-12   |
| Anaerobic selenate reductase%2C molybdenum cofactor-containing periplasmic protein              | 458.154734 | -0.6965828 | 0.12170999 | -5.7233001 | 6.53E-08   |
| Hydrogenase-2 operon protein hybA precursor                                                     | 880.276404 | -0.6981621 | 0.19873802 | -3.5129769 | 0.00143982 |
| Inorganic pyrophosphatase                                                                       | 9505.86119 | -0.6997489 | 0.10689618 | -6.5460605 | 4.71E-10   |
| Acetolactate synthase small subunit                                                             | 1920.15187 | -0.700107  | 0.10369821 | -6.751389  | 1.26E-10   |
| iron aquisition regulator [YbtA%2CAraC-like%2Crequired for transcription of FyuA/psn%2Cllr2]    | 6424.89229 | -0.7011212 | 0.19217271 | -3.648391  | 0.00089881 |
| Putative two-component system sensor kinase                                                     | 281.18084  | -0.7047412 | 0.12660134 | -5.5666174 | 1.54E-07   |
| Glutaminase                                                                                     | 2895.5476  | -0.7049992 | 0.22056392 | -3.1963486 | 0.00404954 |
| SbmA protein                                                                                    | 2697.48515 | -0.7059441 | 0.13321107 | -5.2994403 | 6.55E-07   |
| Ferredoxin reductase                                                                            | 758.408028 | -0.7071691 | 0.09597141 | -7.3685391 | 1.71E-12   |
| Flagellar hook-associated protein FlID                                                          | 17466.2107 | -0.7081335 | 0.12873498 | -5.5007078 | 2.20E-07   |
| FIG01220476: hypothetical protein                                                               | 710.988409 | -0.7089504 | 0.14482772 | -4.8951296 | 4.94E-06   |
| Transcriptional antiterminator of lichen operon%2C BglG family                                  | 84.2898238 | -0.7090924 | 0.22360198 | -3.1712259 | 0.004387   |
| Alanine transaminase                                                                            | 4736.51157 | -0.7126748 | 0.10470821 | -6.8062933 | 8.76E-11   |
| Multimeric flavodoxin WrbA                                                                      | 122.483044 | -0.7140147 | 0.20710121 | -3.4476605 | 0.00179064 |
| RecA protein                                                                                    | 37899.4307 | -0.7146759 | 0.10872922 | -6.5729883 | 3.98E-10   |
| LSU ribosomal protein L19p                                                                      | 5252.92331 | -0.7161982 | 0.137066   | -5.2252066 | 9.65E-07   |
| Phosphoribosylglycinamide formyltransferase                                                     | 1370.33513 | -0.7167725 | 0.1568705  | -4.5691985 | 2.26E-05   |
| Superoxide dismutase [Fe]                                                                       | 2884.77281 | -0.7186732 | 0.13295301 | -5.4054682 | 3.70E-07   |
| D-galactarate dehydratase                                                                       | 300.082986 | -0.7193817 | 0.16672494 | -4.3147819 | 6.73E-05   |
| FIG001196: Membrane protein YedZ                                                                | 10569.4392 | -0.7198679 | 0.16619668 | -4.3314216 | 6.29E-05   |
| Aspartate--ammonia ligase                                                                       | 6313.54664 | -0.7200157 | 0.16114906 | -4.4680105 | 3.54E-05   |
| Inosine 5'-monophosphate dehydrogenase                                                          | 4296.54879 | -0.7208249 | 0.10898463 | -6.6140052 | 3.08E-10   |
| Exopolysaccharuronate lyase                                                                     | 832.449183 | -0.7212485 | 0.1543033  | -4.6742259 | 1.41E-05   |
| Oligopeptide ABC transporter%2C periplasmic oligopeptide-binding protein OppA (TC 3.A.1.5.1)    | 501.008023 | -0.7215966 | 0.11512809 | -6.267772  | 2.69E-09   |
| YehQ protein                                                                                    | 525.331651 | -0.7229668 | 0.13766597 | -5.251601  | 8.42E-07   |
| Hypothetical flavoprotein YqC (clustered with tRNA pseudouridine synthase C)                    | 501.235472 | -0.7232397 | 0.18927764 | -3.821052  | 0.00048137 |
| PTS system%2C fructose-specific IIA component                                                   | 29.4332081 | -0.7233484 | 0.3035451  | -2.3830016 | 0.03778665 |
| Putative transcription factor                                                                   | 470.839016 | -0.724352  | 0.12845873 | -5.6387917 | 1.04E-07   |
| FIG138576: 3-oxoacyl-[ACP] synthase                                                             | 3798.55028 | -0.7278099 | 0.1650583  | -4.4094111 | 4.54E-05   |
| Aminoacyl-histidine dipeptidase (Peptidase D)                                                   | 53580.5849 | -0.729466  | 0.1021728  | -6.6184361 | 3.00E-10   |
| Aspartate aminotransferase                                                                      | 42884.9332 | -0.7300578 | 0.08864338 | -8.2358977 | 2.30E-15   |
| Transcriptional regulator%2C IclR family                                                        | 179.746015 | -0.7302565 | 0.19635653 | -3.7190332 | 0.00069671 |
| PTS system%2C glucitol/sorbitol-specific IIB component and second of two IIC components         | 40.9983805 | -0.7312097 | 0.24761779 | -2.9529771 | 0.00836968 |
| FIG00640497: hypothetical protein                                                               | 163.350279 | -0.7317069 | 0.18385604 | -3.9797816 | 0.00026553 |
| Uracil permease                                                                                 | 371.912185 | -0.7348375 | 0.16808457 | -4.3718321 | 5.30E-05   |
| probable membrane protein yjcl                                                                  | 1778.27197 | -0.7357762 | 0.16448878 | -4.4731086 | 3.47E-05   |
| Crotonobetaine carnitine-CoA ligase                                                             | 2034.15831 | -0.7371352 | 0.09060194 | -8.1359758 | 5.14E-15   |
| Formate dehydrogenase N beta subunit                                                            | 187.249855 | -0.7372416 | 0.17832936 | -4.1341571 | 0.00014175 |
| Inhibitor of vertebrate lysozyme precursor                                                      | 3179.05665 | -0.7373069 | 0.11127323 | -6.6260943 | 2.87E-10   |
| FIG00637942: hypothetical protein                                                               | 5105.33105 | -0.7382446 | 0.12163648 | -6.0692699 | 8.94E-09   |
| Outer membrane protein F precursor                                                              | 110512.768 | -0.7414895 | 0.14557497 | -5.0935234 | 1.88E-06   |
| FIG001943: hypothetical protein YajQ                                                            | 5513.31829 | -0.7439005 | 0.10463626 | -7.109395  | 1.10E-11   |
| Homoserine O-succinyltransferase                                                                | 1289.00869 | -0.7465429 | 0.15216865 | -4.9060232 | 4.69E-06   |
| Phosphoheptose isomerase 1                                                                      | 8537.45359 | -0.7485099 | 0.1170686  | -6.3937717 | 1.25E-09   |
| Uxu operon transcriptional regulator                                                            | 2758.95483 | -0.7491761 | 0.08585173 | -8.7263944 | 3.90E-17   |
| Succinate dehydrogenase iron-sulfur protein                                                     | 1756.59016 | -0.7511252 | 0.1020519  | -7.3602276 | 1.82E-12   |
| Cytochrome c551 peroxidase                                                                      | 203.022158 | -0.7514343 | 0.13627018 | -5.5142972 | 2.04E-07   |
| D-serine permease DsdX                                                                          | 129.438752 | -0.7516291 | 0.23329589 | -3.2217845 | 0.00374351 |
| Twin-arginine translocation protein TatE                                                        | 535.801272 | -0.7519424 | 0.22981415 | -3.2719585 | 0.00319201 |
| TonB-dependent receptor%3B Outer membrane receptor for ferric enterobactin and colicins B%2C D  | 102178.665 | -0.7546478 | 0.12722852 | -5.9314358 | 1.98E-08   |
| Inner membrane transport protein YbaT                                                           | 1836.10873 | -0.7552866 | 0.20186239 | -3.7415916 | 0.00064267 |
| Thiamin ABC transporter%2C transmembrane component                                              | 2699.25795 | -0.7553822 | 0.13566942 | -5.5678148 | 1.53E-07   |
| S-adenosylmethionine synthetase                                                                 | 21223.8462 | -0.755624  | 0.12421912 | -6.0829927 | 8.26E-09   |
| DUF1440 domain-containing membrane protein                                                      | 35902.9513 | -0.7560478 | 0.13822643 | -5.4696327 | 2.61E-07   |
| Deoxyribose-phosphate aldolase                                                                  | 5244.64917 | -0.7561967 | 0.09540015 | -7.9265782 | 2.71E-14   |
| Protein yjH                                                                                     | 1157.22962 | -0.7578382 | 0.15302874 | -4.9522607 | 3.77E-06   |
| PTS system%2C glucose-specific IIB component                                                    | 17074.4119 | -0.7582137 | 0.13659074 | -5.550989  | 1.67E-07   |
| Putative translation initiation inhibitor YoaB                                                  | 318.637153 | -0.7582152 | 0.15390743 | -4.9264367 | 4.26E-06   |
| Capsular polysaccharide ABC transporter%2CATP-binding protein KpsT                              | 4633.73979 | -0.7595521 | 0.1300942  | -5.8384779 | 3.37E-08   |
| UHP0265 protein YeeX                                                                            | 12917.4174 | -0.759713  | 0.09841632 | -7.7193803 | 1.31E-13   |
| FIG000875: Thioredoxin domain-containing protein Ec-YbN                                         | 6097.65464 | -0.7625969 | 0.1151509  | -6.6225873 | 2.92E-10   |
| hypothetical protein                                                                            | 89.465888  | -0.7630408 | 0.29438239 | -2.5920054 | 0.02248126 |
| Uridine phosphorylase                                                                           | 13133.0057 | -0.7665297 | 0.09433753 | -8.1253953 | 5.58E-15   |
| ATPase component STY3233 of energizing module of queuosine-regulated ECF transporter            | 130.771498 | -0.7672177 | 0.22362635 | -3.430802  | 0.00189681 |
| Phage minor tail protein                                                                        | 119.039088 | -0.7691993 | 0.25424793 | -3.0253907 | 0.00680628 |
| [NiFe] hydrogenase metallocenter assembly protein HybG                                          | 192.927319 | -0.7703008 | 0.16586596 | -4.644116  | 1.61E-05   |
| Transcriptional regulator%2C TetR family                                                        | 1003.90423 | -0.7723908 | 0.14313589 | -5.3962059 | 3.89E-07   |
| Ribokinese                                                                                      | 1564.17296 | -0.7740285 | 0.12267893 | -6.3093846 | 2.10E-09   |
| Adenylate-forming enzyme                                                                        | 121.868583 | -0.7742295 | 0.22790215 | -3.3972014 | 0.00212035 |
| Glutamate synthase [NADPH] small chain                                                          | 368.848422 | -0.7766201 | 0.16478747 | -4.7128591 | 1.18E-05   |
| FIG00638119: hypothetical protein                                                               | 32.1716019 | -0.7790345 | 0.34016705 | -2.2901527 | 0.04693149 |
| N-acetylneuraminate lyase                                                                       | 48.313844  | -0.7799044 | 0.2573651  | -3.0303424 | 0.00671903 |

|                                                                                                                         |            |            |            |            |            |
|-------------------------------------------------------------------------------------------------------------------------|------------|------------|------------|------------|------------|
| Glucitol operon GutQ protein                                                                                            | 1038.01513 | -0.7808409 | 0.12431805 | -6.280994  | 2.49E-09   |
| Putative tail component of prophage CP-933K                                                                             | 290.507037 | -0.7813304 | 0.1864365  | -4.1908662 | 0.00011277 |
| GMP synthase [glutamine-hydrolyzing]%2Camidotransferase subunit                                                         | 6879.12571 | -0.7818537 | 0.10700582 | -7.3066469 | 2.69E-12   |
| Ferrous iron-sensing transcriptional regulator FeoC                                                                     | 2974.43105 | -0.7845046 | 0.1251663  | -6.2676988 | 2.69E-09   |
| DNA-binding protein stpA                                                                                                | 417.465223 | -0.785216  | 0.14098829 | -5.5693706 | 1.52E-07   |
| FIG00637875: hypothetical protein                                                                                       | 2753.68557 | -0.7880233 | 0.12516037 | -6.2961089 | 2.27E-09   |
| 2-dehydro-3-deoxygluconate kinase                                                                                       | 1211.55146 | -0.7887393 | 0.10522484 | -7.4957516 | 6.88E-13   |
| ElaA protein                                                                                                            | 198.719651 | -0.7925041 | 0.15483644 | -5.1183309 | 1.67E-06   |
| Flagellar biosynthesis protein FlIS                                                                                     | 5038.68363 | -0.7940072 | 0.13682267 | -5.8031844 | 4.13E-08   |
| Glucose-6-phosphate isomerase                                                                                           | 19873.3771 | -0.794497  | 0.09323376 | -8.521559  | 2.23E-16   |
| Putative glycosyltransferase                                                                                            | 3441.35457 | -0.7946634 | 0.15335898 | -5.181721  | 1.21E-06   |
| Crotonobetainyl-CoA:carnitine CoA-transferase                                                                           | 1182.52456 | -0.7962161 | 0.10741721 | -7.4123699 | 1.26E-12   |
| Microcin H47 precursor (MccH47)                                                                                         | 7139.49881 | -0.7972781 | 0.16228159 | -4.9129302 | 4.54E-06   |
| Flagellar biosynthesis protein FlgN                                                                                     | 2347.11634 | -0.7992549 | 0.16203232 | -4.9326882 | 4.14E-06   |
| Phosphotransferase system%2C phosphocarrier protein HPr                                                                 | 4634.93856 | -0.8002022 | 0.11725788 | -6.8242941 | 7.78E-11   |
| Mg(2+) transport ATPase protein C / Putative membrane transporter ATPase%2CYhiD                                         | 418.511397 | -0.8005957 | 0.22353344 | -3.5815478 | 0.00113639 |
| Protein RcsF                                                                                                            | 1963.87212 | -0.8013106 | 0.09729285 | -8.2360685 | 2.30E-15   |
| FIG00638561: hypothetical protein                                                                                       | 59573.3661 | -0.8035496 | 0.12797449 | -6.2789825 | 2.52E-09   |
| Succinate dehydrogenase flavoprotein subunit                                                                            | 6207.57121 | -0.8052269 | 0.09637255 | -8.3553554 | 8.77E-16   |
| Cytosine deaminase                                                                                                      | 3002.55558 | -0.8055191 | 0.09067083 | -8.8839946 | 1.00E-17   |
| Flagellar hook-associated protein FlgK                                                                                  | 28672.4617 | -0.8055729 | 0.12024789 | -6.6992682 | 1.80E-10   |
| Maltose/maltodextrin ABC transporter%2C substrate binding periplasmic protein MalE                                      | 166.191356 | -0.8057041 | 0.17281834 | -4.6621447 | 1.49E-05   |
| FIG00639949: hypothetical protein                                                                                       | 1447.79929 | -0.8102318 | 0.10512487 | -7.7073273 | 1.44E-13   |
| Acetyltransferase                                                                                                       | 69.495084  | -0.810283  | 0.2461751  | -3.2914905 | 0.00299734 |
| Alkylphosphonate utilization operon protein PhnA                                                                        | 943.806078 | -0.8138981 | 0.10771114 | -7.5563042 | 4.46E-13   |
| HTH-type transcriptional regulator znrR                                                                                 | 387.949333 | -0.8144927 | 0.13976946 | -5.8274012 | 3.59E-08   |
| Ferritin-like protein 2                                                                                                 | 787.011421 | -0.8151552 | 0.1360732  | -5.9905641 | 1.41E-08   |
| DNA damage-inducible gene in SOS regulon%2Cdependent on cyclic AMP and H-NS                                             | 1936.87201 | -0.8191319 | 0.16547963 | -4.9500466 | 3.81E-06   |
| Pyridoxal kinase                                                                                                        | 956.314286 | -0.8193114 | 0.12435753 | -6.5883538 | 3.63E-10   |
| Beta-lactamase                                                                                                          | 4972.40445 | -0.8195321 | 0.10374715 | -7.899322  | 3.33E-14   |
| 3-methyl-2-oxobutanoate hydroxymethyltransferase                                                                        | 10114.6854 | -0.8209079 | 0.08329561 | -9.8553551 | 1.33E-21   |
| ATP synthase B chain                                                                                                    | 16574.3802 | -0.8222572 | 0.10291178 | -7.9899232 | 1.64E-14   |
| probable lipoprotein                                                                                                    | 139.906647 | -0.8230559 | 0.19425758 | -4.2369308 | 9.35E-05   |
| Phosphoenolpyruvate carboxykinase [ATP]                                                                                 | 5381.8725  | -0.8241228 | 0.11882772 | -6.9354425 | 3.68E-11   |
| Ribose operon repressor                                                                                                 | 959.914668 | -0.8243733 | 0.22502554 | -3.6634654 | 0.00085242 |
| Exonuclease SbcC                                                                                                        | 3181.02415 | -0.8250379 | 0.10317984 | -7.9961159 | 1.56E-14   |
| L-aspartate oxidase                                                                                                     | 28456.9246 | -0.8254377 | 0.09277091 | -8.8975924 | 9.00E-18   |
| NADPH-dependent broad range aldehyde dehydrogenase YqhD                                                                 | 1931.13865 | -0.8263203 | 0.12830497 | -6.4402833 | 9.29E-10   |
| Putative carbohydrate PTS system%2C IIA component                                                                       | 65.293698  | -0.8263629 | 0.21022843 | -3.9307856 | 0.00031893 |
| putative oxidoreductase%2C Fe-S subunit                                                                                 | 24.8635513 | -0.8274914 | 0.34983505 | -2.3653759 | 0.03932336 |
| Pyruvate kinase                                                                                                         | 10515.5544 | -0.8291813 | 0.09242035 | -8.9718472 | 4.77E-18   |
| iron aquisition yersiniabactin synthesis enzyme (Irp1%2Cpolyketide synthetase)                                          | 630816.169 | -0.8299795 | 0.16250929 | -5.1072744 | 1.76E-06   |
| Phosphogluconate dehydratase                                                                                            | 1163.40018 | -0.8302091 | 0.12776193 | -6.4980943 | 6.45E-10   |
| Uptake hydrogenase small subunit precursor                                                                              | 2031.17911 | -0.8306742 | 0.1883467  | -4.4103465 | 4.53E-05   |
| putative phage tail component                                                                                           | 191.803016 | -0.8311612 | 0.1827525  | -4.5480156 | 2.49E-05   |
| Glycosyl transferase                                                                                                    | 3667.98848 | -0.8357256 | 0.13149656 | -6.3554938 | 1.59E-09   |
| ATP-dependent protease La                                                                                               | 42001.1901 | -0.839767  | 0.10207738 | -8.2267694 | 2.47E-15   |
| Dihydropyrimidine dehydrogenase [NADP+]                                                                                 | 185.743136 | -0.8417651 | 0.16257841 | -5.1775947 | 1.23E-06   |
| Head decoration protein                                                                                                 | 384.888392 | -0.8443084 | 0.19545338 | -4.3197432 | 6.60E-05   |
| Methionine ABC transporter substrate-binding protein                                                                    | 32457.6997 | -0.8446042 | 0.12930306 | -6.5319743 | 5.16E-10   |
| 2"%2C3"-cyclic-nucleotide 2"-phosphodiesterase                                                                          | 2924.60413 | -0.8483472 | 0.09776875 | -8.6770794 | 5.97E-17   |
| FIG00637878: hypothetical protein                                                                                       | 1645.53574 | -0.8483623 | 0.12470673 | -6.8028592 | 8.95E-11   |
| Hypothetical response regulatory protein yehT                                                                           | 208.535473 | -0.8539571 | 0.16783362 | -5.0881172 | 1.93E-06   |
| Prophage C1p protease-like protein                                                                                      | 725.079716 | -0.8557881 | 0.18828962 | -4.5450626 | 2.52E-05   |
| Phosphoglycerate mutase                                                                                                 | 107207.163 | -0.8564986 | 0.11287963 | -7.5877167 | 3.53E-13   |
| Phosphomannomutase                                                                                                      | 8328.49607 | -0.8579443 | 0.11813931 | -7.2621402 | 3.72E-12   |
| Universal stress protein A                                                                                              | 19263.6564 | -0.8584209 | 0.16817389 | -5.1043651 | 1.78E-06   |
| Transcriptional regulator%2C ArsR family                                                                                | 380.904507 | -0.8589934 | 0.25382697 | -3.384169  | 0.00221195 |
| Ascorbate-specific PTS system%2C EIIa component                                                                         | 138.002614 | -0.8595443 | 0.1926917  | -4.4607229 | 3.66E-05   |
| Iron(III) dicitrate transport ATP-binding protein FecC (TC 3.A.1.14.1)                                                  | 2087.66463 | -0.8608431 | 0.13653457 | -6.3049459 | 2.15E-09   |
| 3'-to-5' oligoribonuclease (orn)                                                                                        | 1256.53821 | -0.8651858 | 0.11138398 | -7.7675964 | 9.14E-14   |
| hypothetical protein                                                                                                    | 8120.81178 | -0.8655432 | 0.1451592  | -5.9627172 | 1.65E-08   |
| isochorismate synthase                                                                                                  | 27034.0573 | -0.8665131 | 0.11746    | -7.3770914 | 1.62E-12   |
| Transcription repressor                                                                                                 | 1703.60074 | -0.8694254 | 0.11463465 | -7.5843156 | 3.62E-13   |
| FxsA protein                                                                                                            | 560.387633 | -0.8695151 | 0.12402089 | -7.0110378 | 2.19E-11   |
| Cytochrome c-type biogenesis protein CcmD%2Cinteracts with CcmCE                                                        | 19.4358601 | -0.8697045 | 0.36489726 | -2.3834228 | 0.03777276 |
| Pectin degradation protein KdgF                                                                                         | 99.7416508 | -0.8748724 | 0.24519269 | -3.5681015 | 0.00118796 |
| Alkaline phosphatase like protein                                                                                       | 163.483214 | -0.8776959 | 0.18580769 | -4.7236789 | 1.12E-05   |
| Glycosyltransferase                                                                                                     | 5178.38349 | -0.8801766 | 0.19694454 | -4.4691596 | 3.53E-05   |
| YdcH protein                                                                                                            | 289.915377 | -0.880202  | 0.13862697 | -6.3494282 | 1.65E-09   |
| PTS system%2C fructose-specific IIB component                                                                           | 40.253626  | -0.8802431 | 0.26773483 | -3.2877423 | 0.00303367 |
| Putative acetyltransferase                                                                                              | 46.5444539 | -0.881935  | 0.23696005 | -3.7218723 | 0.00068943 |
| COG3311: Predicted transcriptional regulator                                                                            | 36.4909425 | -0.8835206 | 0.30271673 | -2.9186383 | 0.00925055 |
| UDP-N-acetylmuramate-L-alanyl-gamma-D-glutamyl-meso-diaminopimelate ligase                                              | 4404.78235 | -0.8866047 | 0.09996823 | -8.8688644 | 1.14E-17   |
| Phage integrase                                                                                                         | 523.539123 | -0.8886089 | 0.12802827 | -6.940724  | 3.56E-11   |
| ATP synthase delta chain                                                                                                | 17395.3979 | -0.8912079 | 0.11066927 | -8.0528942 | 9.99E-15   |
| Proposed lipote regulatory protein YbeD                                                                                 | 973.351122 | -0.8931768 | 0.22516529 | -3.9667607 | 0.00027909 |
| 5'-methylthioadenosine nucleosidase) / S-adenosylhomocysteine nucleosidase                                              | 11410.9673 | -0.8935651 | 0.0897125  | -9.9603193 | 4.78E-22   |
| S-formylglutathione hydrolase                                                                                           | 2611.32056 | -0.8956661 | 0.12630262 | -7.0914289 | 1.25E-11   |
| Ornithine carbamoyltransferase                                                                                          | 117.202211 | -0.8973838 | 0.18890999 | -4.7503247 | 9.88E-06   |
| Di/tripeptide permease YjdL                                                                                             | 777.234332 | -0.8984885 | 0.12052314 | -7.454904  | 9.31E-13   |
| Putative sulfite oxidase subunit YedY                                                                                   | 30933.8719 | -0.8987239 | 0.19107568 | -4.7034972 | 1.23E-05   |
| Acetate kinase                                                                                                          | 12021.9028 | -0.8990623 | 0.10108775 | -8.8938799 | 9.28E-18   |
| Anaerobic glycerol-3-phosphate dehydrogenase subunit B                                                                  | 172.216948 | -0.8993051 | 0.21458842 | -4.1908371 | 0.00011277 |
| Anthraniolate synthase%2C a-aminase component                                                                           | 10868.46   | -0.9046772 | 0.1404387  | -6.4417941 | 9.23E-10   |
| Lysyl-tRNA synthetase (class II)                                                                                        | 12716.5739 | -0.9053224 | 0.10371969 | -8.7285496 | 3.84E-17   |
| phage lysozyme                                                                                                          | 62.4755594 | -0.9078062 | 0.32204474 | -2.8188821 | 0.01225767 |
| Glycosyl transferase                                                                                                    | 3744.8085  | -0.908994  | 0.10980411 | -8.2783237 | 1.64E-15   |
| Antigen 43 precursor                                                                                                    | 4813.36371 | -0.9101245 | 0.11590456 | -7.852362  | 4.77E-14   |
| putative membrane protein                                                                                               | 1311.617   | -0.9138477 | 0.14494264 | -6.3048922 | 2.15E-09   |
| Glutamate-1-semialdehyde aminotransferase                                                                               | 18941.676  | -0.9173393 | 0.10242379 | -8.9563112 | 5.46E-18   |
| Mutator mutT protein (7%2C8-dihydro-8-oxoguanine-triphosphatase)                                                        | 71.3922194 | -0.9191457 | 0.21956221 | -4.1862654 | 0.00011473 |
| NAD(P) transhydrogenase subunit beta                                                                                    | 17115.9526 | -0.9203687 | 0.10874513 | -8.4635397 | 3.60E-16   |
| N-acetylneuraminate lyase                                                                                               | 74.3730135 | -0.9210005 | 0.22883664 | -4.024707  | 0.00022195 |
| Transcriptional repressor protein TrpR                                                                                  | 61.664357  | -0.9229115 | 0.15881227 | -5.8113361 | 3.94E-08   |
| Putative oxidoreductase YdjI                                                                                            | 63.2376381 | -0.928804  | 0.26472613 | -3.5085468 | 0.00146101 |
| Ferrous iron transport periplasmic protein EfeO%2Ccontains peptidase-M75 domain and (frequently) cupredoxin-like domain | 22287.3535 | -0.9294107 | 0.15324762 | -6.0647645 | 9.18E-09   |
| FIG00640624: hypothetical protein                                                                                       | 2200.91333 | -0.9305631 | 0.1256903  | -7.4036186 | 1.34E-12   |
| Mannose-1-phosphate guanylyltransferase (GDP)                                                                           | 7123.98936 | -0.9306196 | 0.15932808 | -5.840901  | 3.33E-08   |
| 4-carboxymuconolactone decarboxylase domain/alkylhydroperoxidase AhpD family core domain protein                        | 120.532799 | -0.9323447 | 0.25314513 | -3.6830442 | 0.00079412 |
| FIG00638599: hypothetical protein                                                                                       | 68.100731  | -0.937126  | 0.23411996 | -4.00276   | 0.00024219 |
| Iron(III) dicitrate transport system permease protein FecD (TC 3.A.1.14.1)                                              | 494.935596 | -0.937271  | 0.19895035 | -4.7110796 | 1.19E-05   |
| FIG00638822: hypothetical protein                                                                                       | 184.267461 | -0.9379444 | 0.27893665 | -3.3625714 | 0.00023738 |
| 4-hydroxy-2-oxoglutarate aldolase                                                                                       | 5879.85184 | -0.9395892 | 0.10518249 | -8.9329434 | 6.65E-18   |
| Flagellar transcriptional activator FlhD                                                                                | 1412.34979 | -0.9404393 | 0.13555009 | -6.9379464 | 3.62E-11   |
| Formate dehydrogenase N alpha subunit                                                                                   | 435.946106 | -0.940863  | 0.14293188 | -6.582597  | 3.76E-10   |
| Oxygen-insensitive NAD(P)H nitroreductase                                                                               | 6937.72836 | -0.9413836 | 0.09473671 | -9.9368406 | 6.02E-22   |

|                                                                                                                  |            |            |            |             |            |
|------------------------------------------------------------------------------------------------------------------|------------|------------|------------|-------------|------------|
| Pantoate--beta-alanine ligase                                                                                    | 22615.0832 | -0.9437318 | 0.078415   | -12.035093  | 1.02E-31   |
| ATP synthase alpha chain                                                                                         | 62760.3827 | -0.9451954 | 0.10330275 | -9.1497606  | 9.61E-19   |
| Type I restriction-modification system%2Crestriction subunit R                                                   | 7497.6189  | -0.9464091 | 0.10958592 | -8.6362291  | 8.35E-17   |
| Probable L-ascorbate-6-phosphate lactonase UlaG                                                                  | 751.546211 | -0.9473057 | 0.12057116 | -7.8568182  | 4.63E-14   |
| 5%2C10-methylenetetrahydrofolate reductase                                                                       | 1959.3245  | -0.9496418 | 0.15784613 | -6.0162499  | 1.21E-08   |
| Predicted L-lactate dehydrogenase%2C hypothetical protein subunit YkgG                                           | 634.461694 | -0.9533656 | 0.11916062 | -8.0006766  | 1.51E-14   |
| NAD(P) transhydrogenase alpha subunit                                                                            | 17242.0969 | -0.9579689 | 0.10605671 | -9.0326104  | 2.75E-18   |
| Anaerobic glycerol-3-phosphate dehydrogenase subunit A                                                           | 327.233189 | -0.9588478 | 0.36014476 | -2.6623956  | 0.01876088 |
| Transaldolase                                                                                                    | 54249.8019 | -0.9591348 | 0.09865058 | -9.7225465  | 4.63E-21   |
| unnamed protein product                                                                                          | 701.258186 | -0.9642534 | 0.16504691 | -5.8422987  | 3.30E-08   |
| ATP synthase C chain                                                                                             | 7069.93501 | -0.9701908 | 0.11950543 | -8.1183823  | 5.88E-15   |
| COG1457: Purine-cytosine permease and related proteins                                                           | 555.295772 | -0.9704124 | 0.14738736 | -6.5840949  | 3.73E-10   |
| Thiamin ABC transporter%2C ATPase component / Thiamine transport ATP-binding protein thiQ                        | 645.014497 | -0.9816628 | 0.1293732  | -7.5878376  | 3.53E-13   |
| Flagellar hook-associated protein FlgI                                                                           | 33750.2902 | -0.9824188 | 0.13240364 | -7.4198775  | 1.20E-12   |
| Threonine efflux protein                                                                                         | 181.996642 | -0.9840057 | 0.14793478 | -6.6516182  | 2.44E-10   |
| Protein slyX                                                                                                     | 70.2440498 | -0.9843337 | 0.32016074 | -3.0744984  | 0.00589229 |
| UDP-glucose 4-epimerase                                                                                          | 6562.1415  | -0.9843476 | 0.15005774 | -6.5597925  | 4.34E-10   |
| Formate dehydrogenase N alpha subunit                                                                            | 68.8116181 | -0.9889401 | 0.21605597 | -4.5772404  | 2.18E-05   |
| hypothetical protein                                                                                             | 2409.11241 | -0.9890318 | 0.16760645 | -5.9009171  | 2.37E-08   |
| Putative phosphatase YfbT                                                                                        | 5623.21238 | -0.9893618 | 0.09829899 | -10.064822  | 1.73E-22   |
| iron aquisition yersiniabactin synthesis enzyme (YbtT%2Cresembles thioesterases)                                 | 39518.5996 | -0.9913393 | 0.19152435 | -5.176048   | 1.24E-06   |
| ATP synthase gamma chain                                                                                         | 30669.6641 | -0.99307   | 0.1188988  | -8.3522292  | 8.95E-16   |
| Pseudouridine 5'-phosphate glycosidase                                                                           | 148.556396 | -0.9940891 | 0.26220801 | -3.7912234  | 0.00053647 |
| predicted 4-deoxy-L-threo-5-hexosulose-uronate ketol-isomerase                                                   | 1301.97823 | -0.9942326 | 0.1442568  | -6.8921025  | 4.95E-11   |
| Pyruvate kinase                                                                                                  | 15123.3875 | -0.9985469 | 0.11261051 | -8.8672623  | 1.16E-17   |
| Inosine-uridine preferring nucleoside hydrolase                                                                  | 578.988554 | -0.9988781 | 0.15175756 | -6.5820644  | 3.77E-10   |
| hypothetical protein                                                                                             | 530.900555 | -1.0017897 | 0.18615248 | -5.3815545  | 4.21E-07   |
| Regulator of L-galactonate catabolism YjJM                                                                       | 673.23131  | -1.0059044 | 0.15132542 | -6.6472933  | 2.50E-10   |
| Quinolinate synthetase                                                                                           | 32323.3081 | -1.0073013 | 0.08997557 | -11.195276  | 1.26E-27   |
| Pyridine nucleotide-disulphide oxidoreductase family protein                                                     | 161.592452 | -1.0091447 | 0.16332452 | -6.1787702  | 4.64E-09   |
| Uracil phosphoribosyltransferase                                                                                 | 1387.96285 | -1.019439  | 0.11278905 | -9.0384568  | 2.62E-18   |
| D-lactate dehydrogenase                                                                                          | 42034.2148 | -1.0210123 | 0.09959574 | -10.251567  | 2.64E-23   |
| Nitric oxide-dependent regulator DnrN or NorA                                                                    | 402.394937 | -1.021076  | 0.12692351 | -8.0448136  | 1.06E-14   |
| FIG00644506: hypothetical protein                                                                                | 52.00571   | -1.0216386 | 0.25518323 | -4.0035492  | 0.00024158 |
| hypothetical protein                                                                                             | 193.652728 | -1.0234515 | 0.17232085 | -5.9392203  | 1.89E-08   |
| Uridylate kinase                                                                                                 | 5282.86592 | -1.0242671 | 0.08998291 | -11.382907  | 1.59E-28   |
| FIG00637894: hypothetical protein                                                                                | 1218.70268 | -1.0272044 | 0.15654958 | -6.5615277  | 4.29E-10   |
| iron aquisition yersiniabactin synthesis enzyme (YbtT%2Cresembles thioesterases)                                 | 5257.52753 | -1.0311181 | 0.13671614 | -7.5420366  | 4.96E-13   |
| Yersiniabactin synthetase%2C thiazolinyI reductase component Irp3                                                | 54084.7191 | -1.0345386 | 0.18547271 | -5.5778481  | 1.46E-07   |
| Fructose repressor FruR%2C LacI family                                                                           | 7838.37512 | -1.0380157 | 0.10776951 | -9.6318126  | 1.09E-20   |
| %2C3-bisphosphoglycerate-independent phosphoglycerate mutase                                                     | 6721.74224 | -1.0562157 | 0.10199038 | -10.356033  | 9.11E-24   |
| Putative sugar phosphotransferase component II B                                                                 | 205.128768 | -1.058052  | 0.17481796 | -6.0523069  | 9.80E-09   |
| 16 kDa heat shock protein A                                                                                      | 1265.54197 | -1.0593331 | 0.14397256 | -7.3578824  | 1.85E-12   |
| Predicted L-lactate dehydrogenase%2C Iron-sulfur cluster-binding subunit YkgF                                    | 1627.77603 | -1.0596108 | 0.12500407 | -8.4766103  | 3.25E-16   |
| Phosphoenolpyruvate-protein phosphotransferase of PTS system                                                     | 41189.7354 | -1.0608385 | 0.10768813 | -9.8510257  | 1.38E-21   |
| Phosphoglycerate kinase                                                                                          | 30660.5316 | -1.0657327 | 0.0980684  | -10.867238  | 4.52E-26   |
| %2C3-dihydroxybenzoate-AMP ligase                                                                                | 51465.4003 | -1.0662271 | 0.13115805 | -8.1293296  | 5.42E-15   |
| Predicted L-lactate dehydrogenase%2C Fe-S oxidoreductase subunit YkgE                                            | 666.395954 | -1.0662612 | 0.13799641 | -7.7267315  | 1.24E-13   |
| Cytochrome d ubiquinol oxidase subunit I                                                                         | 76661.3109 | -1.0674433 | 0.12773667 | -8.356592   | 8.70E-16   |
| Ribose ABC transport system%2C high affinity permease RbsD (TC 3.A.1.2.1)                                        | 2251.21857 | -1.0706353 | 0.19225028 | -5.568966   | 1.52E-07   |
| Flagellar transcriptional activator FlhC                                                                         | 3519.84459 | -1.0718637 | 0.1478916  | -7.2476305  | 4.14E-12   |
| PTS system%2C glucitol/sorbitol-specific IIA component                                                           | 18.4469072 | -1.0750805 | 0.42954874 | -2.5028138  | 0.028228   |
| Proofreading thioesterase in enterobactin biosynthesis EntH                                                      | 7979.78937 | -1.0769941 | 0.15560726 | -6.921233   | 4.05E-11   |
| Xanthine dehydrogenase%2C molybdenum binding subunit                                                             | 365.850679 | -1.0781613 | 0.12440131 | -8.6668005  | 6.47E-17   |
| FIG00644121: hypothetical protein                                                                                | 56.2658844 | -1.0794807 | 0.22578073 | -4.7811022  | 8.55E-06   |
| Crotonobetainyl-CoA dehydrogenase                                                                                | 700.184882 | -1.0794919 | 0.12973956 | -8.3204534  | 1.16E-15   |
| Flagellar biosynthesis protein FlIT                                                                              | 2199.74199 | -1.0807748 | 0.18292702 | -5.9082291  | 2.27E-08   |
| Phosphoribosylformylglycinamidase cyclo-ligase                                                                   | 1373.13846 | -1.08239   | 0.18193891 | -5.9491947  | 1.79E-08   |
| Galactose/methyl galactoside ABC transport system%2C D-galactose-binding periplasmic protein MglB (TC 3.A.1.2.3) | 430.6944   | -1.0853611 | 0.23784799 | -4.5632555  | 2.32E-05   |
| Periplasmic binding protein                                                                                      | 1455.4393  | -1.0899404 | 0.23471142 | -4.6267045  | 1.75E-05   |
| Maltose/maltodextrin transport ATP-binding protein MalK                                                          | 41.6052246 | -1.0918028 | 0.3105574  | -3.5156233  | 0.00142653 |
| glycosyl transferase%2C family 2                                                                                 | 13953.8827 | -1.0919188 | 0.19984769 | -5.4637546  | 2.69E-07   |
| %2C3-dihydro-2%2C3-dihydroxybenzoate dehydrogenase                                                               | 19012.8824 | -1.0949913 | 0.14778609 | -7.4092986  | 1.29E-12   |
| Galactoside O-acetyltransferase                                                                                  | 1159.1178  | -1.1018288 | 0.13079988 | -8.4237752  | 5.00E-16   |
| Ureidoglycolate hydrolase                                                                                        | 77.3862262 | -1.1071182 | 0.21258934 | -5.2077787  | 1.05E-06   |
| Nitrate/nitrite transporter                                                                                      | 350.096686 | -1.1208751 | 0.18316212 | -6.1195794  | 6.63E-09   |
| putative exported protein                                                                                        | 285.472007 | -1.1252917 | 0.17947532 | -6.2698965  | 2.66E-09   |
| ATP synthase epsilon chain                                                                                       | 12670.01   | -1.1257868 | 0.10985096 | -10.248312  | 2.71E-23   |
| [NiFe] hydrogenase metallocenter assembly protein HypF                                                           | 1291.04056 | -1.1333179 | 0.16174437 | -7.0068458  | 2.25E-11   |
| hypothetical protein                                                                                             | 144.3357   | -1.1339635 | 0.180987   | -6.2654413  | 2.73E-09   |
| ATP synthase beta chain                                                                                          | 70487.0861 | -1.1340289 | 0.11543813 | -9.8236944  | 1.78E-21   |
| Aspartate ammonia-lyase                                                                                          | 4986.22374 | -1.1389443 | 0.10749774 | -10.5995053 | 7.78E-25   |
| Aerobactin siderophore receptor IutA @ TonB-dependent siderophore receptor                                       | 590617.871 | -1.139244  | 0.13508231 | -8.4337021  | 4.62E-16   |
| Putative transcriptional regulator LYSR-type                                                                     | 654.346241 | -1.1398044 | 0.10221443 | -11.15111   | 2.07E-27   |
| putative inner membrane protein                                                                                  | 1686.16092 | -1.1400053 | 0.17778812 | -6.4121571  | 1.11E-09   |
| Diethiobiotin synthetase                                                                                         | 849.979715 | -1.1427399 | 0.12363291 | -9.2430076  | 4.12E-19   |
| Predicted oxidoreductases (related to aryl-alcohol dehydrogenases)                                               | 481.006833 | -1.1451211 | 0.11687651 | -9.7977015  | 2.28E-21   |
| 2-keto-3-deoxy-D-arabino-heptulosonate-7-phosphate synthase I alpha                                              | 2659.58275 | -1.1452772 | 0.14453173 | -7.9240541  | 2.76E-14   |
| Xanthine dehydrogenase%2C FAD binding subunit                                                                    | 105.683894 | -1.1470272 | 0.26202087 | -4.3776176  | 5.17E-05   |
| Ferrichrome transport ATP-binding protein PhuC (TC 3.A.1.14.3)                                                   | 791.635487 | -1.1480847 | 0.18952558 | -6.0576769  | 9.52E-09   |
| [NiFe] hydrogenase metallocenter assembly protein HypE                                                           | 859.389549 | -1.1498063 | 0.16748907 | -6.8649628  | 5.96E-11   |
| Alcohol dehydrogenase                                                                                            | 211264.871 | -1.1522051 | 0.15740174 | -7.3201548  | 2.44E-12   |
| Transcriptional activatory protein CalF                                                                          | 143.103537 | -1.1537702 | 0.20820474 | -5.5415176  | 1.76E-07   |
| Universal stress protein C                                                                                       | 1277.4882  | -1.1539431 | 0.11746241 | -9.8239349  | 1.78E-21   |
| ATPase component STY3232 of energizing module of queuosine-regulated ECF transporter                             | 152.86009  | -1.1566762 | 0.17271598 | -6.6969839  | 1.82E-10   |
| Conserved protein YcjX with nucleoside triphosphate hydrolase domain                                             | 2906.369   | -1.1635065 | 0.17664118 | -6.5868359  | 3.66E-10   |
| Isochorismatase                                                                                                  | 45322.5748 | -1.1645007 | 0.16564319 | -7.0301752  | 1.92E-11   |
| iron aquisition %2C3-dihydroxybenzoate-AMP ligase                                                                | 58812.1241 | -1.1647376 | 0.18226218 | -6.3904515  | 1.27E-09   |
| Transcriptional activator GadE                                                                                   | 866.062142 | -1.169052  | 0.32105251 | -3.6413109  | 0.00092191 |
| ATP-dependent DNA helicase RecQ                                                                                  | 1053.8697  | -1.1693861 | 0.13687542 | -8.5434338  | 1.85E-16   |
| FIG007491: hypothetical protein YeeN                                                                             | 1137.04634 | -1.1715037 | 0.16824663 | -6.9630142  | 3.04E-11   |
| Pseudouridine kinase                                                                                             | 138.149252 | -1.1721222 | 0.321169   | -3.6495497  | 0.00089606 |
| ID=gene:EBG00000313248                                                                                           | 2600.77754 | -1.1739386 | 0.48557289 | -2.4176363  | 0.0349273  |
| Periplasmic nitrate reductase component NapD                                                                     | 12.1507945 | -1.1741212 | 0.48534459 | -2.4191496  | 0.03481523 |
| ATP-dependent protease HslV                                                                                      | 2906.91559 | -1.1757197 | 0.15697178 | -7.4900071  | 7.18E-13   |
| Lactaldehyde reductase                                                                                           | 442.750967 | -1.1780602 | 0.15026382 | -7.8399461  | 5.25E-14   |
| Ribose ABC transport system%2C periplasmic ribose-binding protein RbsB (TC 3.A.1.2.1)                            | 3887.12953 | -1.1796904 | 0.1327403  | -8.8872058  | 9.78E-18   |
| Ferrichrome-iron receptor                                                                                        | 7759.56562 | -1.1826812 | 0.30385275 | -3.892284   | 0.00036877 |
| FIG00638244: hypothetical protein                                                                                | 175.93131  | -1.1830087 | 0.23507545 | -5.0324636  | 2.54E-06   |
| radical activating enzyme                                                                                        | 71.5766343 | -1.1855747 | 0.19746218 | -6.0040599  | 1.30E-08   |
| FIG00638989: hypothetical protein                                                                                | 34.6913486 | -1.1914858 | 0.34599728 | -3.4436276  | 0.00181513 |
| 2-deoxy-D-gluconate 3-dehydrogenase                                                                              | 168.650182 | -1.1942782 | 0.19668873 | -6.0719196  | 8.81E-09   |
| Lema PROTEIN                                                                                                     | 23.6354143 | -1.1978424 | 0.36021486 | -3.3253554  | 0.00268666 |
| Cytochrome d ubiquinol oxidase subunit II                                                                        | 705.140726 | -1.2006894 | 0.14337745 | -8.3743251  | 7.53E-16   |
| DedA family inner membrane protein YdjX                                                                          | 45.0203657 | -1.2116324 | 0.31975999 | -3.7891935  | 0.00054005 |
| L-asparaginase                                                                                                   | 639.166659 | -1.2236809 | 0.14596282 | -8.3835114  | 6.98E-16   |
| FIG00638505: hypothetical protein                                                                                | 85.6809179 | -1.2280357 | 0.31367181 | -3.9150339  | 0.00033779 |

|                                                                                              |            |            |            |            |            |
|----------------------------------------------------------------------------------------------|------------|------------|------------|------------|------------|
| Glycerol-3-phosphate transporter                                                             | 352.609722 | -1.2291024 | 0.27378131 | -4.4893584 | 3.24E-05   |
| 5-methyltetrahydropteroyltriglutamate--homocysteine methyltransferase                        | 43458.7226 | -1.2303332 | 0.21652854 | -5.6820832 | 8.21E-08   |
| FIG00639332: hypothetical protein                                                            | 51.5818151 | -1.2308355 | 0.33325333 | -3.6933929 | 0.00076639 |
| Putative transcriptional regulator LYSR-type                                                 | 143.985093 | -1.2339943 | 0.17582285 | -7.0183954 | 2.08E-11   |
| Serine hydroxymethyltransferase                                                              | 21406.4358 | -1.2343475 | 0.13584189 | -9.086649  | 1.70E-18   |
| Starvation sensing protein RspA                                                              | 118.667064 | -1.2372024 | 0.20913629 | -5.9157709 | 2.17E-08   |
| Ribose ABC transport system%2C permease protein RbsC (TC 3.A.1.2.1)                          | 1345.98052 | -1.2414093 | 0.15865299 | -7.8246824 | 5.90E-14   |
| UDP-glucose dehydrogenase                                                                    | 15376.6264 | -1.2440693 | 0.22097902 | -5.6298074 | 1.09E-07   |
| Hydrogenase maturation factor HoxQ                                                           | 551.475224 | -1.2446937 | 0.18782042 | -6.6270417 | 2.85E-10   |
| Negative regulator of flagellin synthesis FlgM                                               | 4400.90498 | -1.2455908 | 0.17643777 | -7.0596608 | 1.56E-11   |
| C4-dicarboxylate transporter DcuC (TC 2.A.61.1.1)                                            | 325.971088 | -1.2558195 | 0.17514193 | -7.170296  | 7.17E-12   |
| Starvation sensing protein RspB                                                              | 166.281223 | -1.257775  | 0.17163185 | -7.3283311 | 2.30E-12   |
| Flagellar biosynthesis protein FlIZ                                                          | 4135.06083 | -1.2619874 | 0.17110826 | -7.3753738 | 1.64E-12   |
| Asparagine synthetase [glutamine-hydrolyzing]                                                | 24221.0963 | -1.2652467 | 0.12852523 | -9.844345  | 1.46E-21   |
| Phosphoribosylformylglycinamide synthase%2Csynthetase subunit                                | 16410.018  | -1.2735741 | 0.17248376 | -7.3837332 | 1.54E-12   |
| Transthyretin-like protein precursor                                                         | 13937.3026 | -1.2772737 | 0.17087524 | -7.4748907 | 8.03E-13   |
| FIG00497792: hypothetical protein                                                            | 20902.7046 | -1.2841057 | 0.17426117 | -7.368857  | 1.71E-12   |
| Putative S-transferase                                                                       | 269.758337 | -1.2918613 | 0.22512148 | -5.7385075 | 5.99E-08   |
| FIG00642340: hypothetical protein                                                            | 147.557116 | -1.2920925 | 0.17196356 | -7.5137574 | 6.09E-13   |
| FIG00639870: hypothetical protein                                                            | 23.9112943 | -1.2942199 | 0.34804452 | -3.718547  | 0.00069754 |
| ATP-dependent hsl protease ATP-binding subunit HslU                                          | 15966.9262 | -1.2957303 | 0.1696432  | -7.6379737 | 2.44E-13   |
| Cobalt-zinc-cadmium resistance protein CzcA%3B Cation efflux system protein CusA             | 2118.47922 | -1.2963044 | 0.18568822 | -6.9810805 | 2.69E-11   |
| Membrane protein YcjF                                                                        | 2101.55318 | -1.2997248 | 0.18110924 | -7.1764689 | 6.88E-12   |
| Mgl repressor and galactose ultrainduction factor Gal5%2C HTH-type transcriptional regulator | 213.861324 | -1.3015499 | 0.25671189 | -5.0700803 | 2.11E-06   |
| Colicin I receptor precursor                                                                 | 21280.5404 | -1.3043087 | 0.14948114 | -8.7255739 | 3.92E-17   |
| putative TYPE II DNA MODIFICATION ENZYME (METHYLTRANSFERASE)                                 | 11361.7719 | -1.3071092 | 0.15476773 | -8.4456182 | 4.18E-16   |
| Hemin ABC transporter%2C permease protein                                                    | 349.337141 | -1.3096752 | 0.23219285 | -5.6404629 | 1.03E-07   |
| Ribose ABC transport system%2C ATP-binding protein RbsA (TC 3.A.1.2.1)                       | 3807.33002 | -1.325209  | 0.12113883 | -10.939589 | 2.07E-26   |
| ID=gene:EBG00000313245                                                                       | 19.0759164 | -1.3447316 | 0.55977415 | -2.4022752 | 0.03612197 |
| Fructose-bisphosphate aldolase class II                                                      | 43862.0208 | -1.3515659 | 0.11275433 | -11.98682  | 1.76E-31   |
| FIG139928: Putative protease                                                                 | 170.364307 | -1.3536416 | 0.19804808 | -6.8349139 | 7.28E-11   |
| TonB-dependent receptor%3B Outer membrane receptor for ferrienterochelin and colicins        | 38712.8388 | -1.3593104 | 0.18205909 | -7.4663147 | 8.56E-13   |
| Protein YbgE                                                                                 | 5304.47916 | -1.3623197 | 0.12771302 | -10.667039 | 3.75E-25   |
| Thiamin ABC transporter%2C substrate-binding component                                       | 8806.71072 | -1.3669115 | 0.12874021 | -10.617596 | 6.15E-25   |
| iron aquisition versiniabactin synthesis enzyme (Irp2)                                       | 246902.571 | -1.3677015 | 0.14460654 | -9.4580887 | 5.64E-20   |
| GMP reductase                                                                                | 8918.44178 | -1.3733495 | 0.10064646 | -13.645283 | 1.40E-40   |
| FIG00638136: hypothetical protein                                                            | 33.4930278 | -1.3748678 | 0.37568786 | -3.6596014 | 0.00086475 |
| Phosphate acetyltransferase                                                                  | 21329.2997 | -1.3827116 | 0.11746341 | -11.771424 | 2.06E-30   |
| Substrate-specific component STY3230 of queuosine-regulated ECF transporter                  | 279.580733 | -1.3951248 | 0.19869548 | -7.0214217 | 2.04E-11   |
| Protease VII (OmpTn) precursor                                                               | 28248.8443 | -1.3967664 | 0.22768381 | -6.1346762 | 6.06E-09   |
| Fe-S-cluster-containing hydrogenase components 2                                             | 356.546573 | -1.4011545 | 0.20070582 | -6.9811355 | 2.69E-11   |
| FIG00639580: hypothetical protein                                                            | 22.9755941 | -1.4017522 | 0.36518715 | -3.8384488 | 0.00045059 |
| Enolase                                                                                      | 71945.7575 | -1.401809  | 0.1179138  | -11.888422 | 5.27E-31   |
| Transmembrane component STY3231 of energizing module of queuosine-regulated ECF transporter  | 400.477813 | -1.402531  | 0.22113686 | -6.3423663 | 1.72E-09   |
| Predicted regulator of STY3230 transporter operon                                            | 93.1158159 | -1.4077721 | 0.24783759 | -5.6802204 | 8.28E-08   |
| Triosephosphate isomerase                                                                    | 15016.6843 | -1.4118327 | 0.10050839 | -14.046914 | 5.60E-43   |
| hypothetical protein                                                                         | 4323.41263 | -1.4347294 | 0.14328611 | -10.013039 | 2.86E-22   |
| Ribose 5-phosphate isomerase A                                                               | 3175.30358 | -1.4455073 | 0.10351222 | -13.964606 | 1.76E-42   |
| FIG00639275: hypothetical protein                                                            | 1045.89512 | -1.4485318 | 0.18553381 | -7.8073736 | 6.74E-14   |
| FIG00638031: hypothetical protein                                                            | 702.085389 | -1.4488245 | 0.12892081 | -11.238097 | 7.99E-28   |
| Heat shock protein GrpE                                                                      | 6002.77915 | -1.4513678 | 0.15833471 | -9.1664537 | 8.26E-19   |
| Pyruvate dehydrogenase E1 component                                                          | 319982.434 | -1.4673961 | 0.12056037 | -12.171463 | 2.01E-32   |
| Antigen 43 precursor                                                                         | 54.183052  | -1.4693224 | 0.28784929 | -5.104485  | 1.78E-06   |
| Hydrogenase maturation factor HoxO/HyaE                                                      | 196.959532 | -1.4773382 | 0.18397656 | -8.0300351 | 1.19E-14   |
| Orotate phosphoribosyltransferase                                                            | 126.696626 | -1.508217  | 0.17177556 | -8.7801603 | 2.46E-17   |
| Zinc resistance-associated protein                                                           | 392.823658 | -1.5110135 | 0.18341365 | -8.2382827 | 2.26E-15   |
| Cytochrome d ubiquinol oxidase subunit II                                                    | 58392.4652 | -1.5159703 | 0.15064202 | -10.063396 | 1.75E-22   |
| ABC-type hemin transport system%2C ATPase component                                          | 455.343536 | -1.52356   | 0.35898999 | -4.2440181 | 9.08E-05   |
| FIG00638665: hypothetical protein                                                            | 230.055399 | -1.5250281 | 0.183743   | -8.2997886 | 1.37E-15   |
| Phosphoribosylglycinamide formyltransferase 2                                                | 2113.65444 | -1.5380769 | 0.14398799 | -10.681981 | 3.25E-25   |
| Coenzyme F420 hydrogenase maturation protease                                                | 663.161144 | -1.5482387 | 0.15457655 | -10.016    | 2.79E-22   |
| Transketolase                                                                                | 30213.8432 | -1.5622125 | 0.11925473 | -13.099795 | 1.82E-37   |
| Hydrogenase maturation protease                                                              | 377.487827 | -1.5649638 | 0.14566177 | -10.74382  | 1.69E-25   |
| Outer membrane porin protein NmpC precursor                                                  | 5355.32072 | -1.5667823 | 0.1691544  | -9.2624393 | 3.46E-19   |
| Antigen 43 precursor                                                                         | 4100.61348 | -1.5755222 | 0.13717845 | -11.485201 | 5.29E-29   |
| Membrane transporter HdeD%2C H-Ns repressed                                                  | 2005.49366 | -1.5923316 | 0.2043024  | -7.7939936 | 7.44E-14   |
| FIG00641652: hypothetical protein                                                            | 42.5877417 | -1.6014037 | 0.27692017 | -5.7829075 | 4.64E-08   |
| Lactose permease                                                                             | 2258.59686 | -1.6045063 | 0.13138298 | -12.212437 | 1.23E-32   |
| Antigen 43 precursor                                                                         | 10437.7359 | -1.6121418 | 0.17326041 | -9.3047329 | 2.37E-19   |
| L-carnitine/gamma-butyrobetaine antiporter                                                   | 73.1551113 | -1.6135152 | 0.21729859 | -7.4253368 | 1.15E-12   |
| Dihydrolipoamide acetyltransferase component of pyruvate dehydrogenase complex               | 236492.361 | -1.6137373 | 0.10912573 | -14.787871 | 1.60E-47   |
| Cytochrome d ubiquinol oxidase subunit I                                                     | 877.0189   | -1.6185591 | 0.15297898 | -10.580271 | 9.02E-25   |
| hypothetical protein                                                                         | 125.030477 | -1.6192867 | 0.67229484 | -2.408596  | 0.03561932 |
| FIG00638118: hypothetical protein                                                            | 262.545524 | -1.6225105 | 0.15971083 | -10.159051 | 6.71E-23   |
| Channel-forming transporter/cytolysins activator of TpsB family                              | 268.074274 | -1.632357  | 0.1374394  | -11.876922 | 5.95E-31   |
| Aspartokinase                                                                                | 73370.8844 | -1.6443375 | 0.18421707 | -8.9260864 | 7.05E-18   |
| hypothetical protein                                                                         | 169.16983  | -1.6520822 | 0.15965471 | -10.347845 | 9.88E-24   |
| [NiFe] hydrogenase metalcenter assembly protein HypD                                         | 731.583945 | -1.6606258 | 0.18588298 | -8.9337166 | 6.63E-18   |
| RNA polymerase sigma factor for flagellar operon                                             | 12096.4154 | -1.6717938 | 0.15422398 | -10.840038 | 6.05E-26   |
| Malonyl CoA-acyl carrier protein transacylase                                                | 44793.9903 | -1.6878773 | 0.17408314 | -9.6958118 | 5.97E-21   |
| FIG00510943: hypothetical protein                                                            | 77.6700069 | -1.7022088 | 0.22891918 | -7.4358506 | 1.07E-12   |
| Microcin M immunity protein McmI                                                             | 304.651409 | -1.7146995 | 0.18533224 | -9.2520304 | 3.80E-19   |
| Tryptophan-specific transport protein                                                        | 17687.7792 | -1.733181  | 0.30253953 | -5.7287756 | 6.33E-08   |
| RND efflux system%2C inner membrane transporter CmeB                                         | 2273.02058 | -1.7429131 | 0.20247393 | -8.6080862 | 1.07E-16   |
| IMP cyclohydrolase                                                                           | 7921.27921 | -1.7540856 | 0.17865276 | -9.8184077 | 1.86E-21   |
| Channel-forming transporter/cytolysins activator of TpsB family                              | 2762.30118 | -1.7613472 | 0.14798891 | -11.901886 | 4.56E-31   |
| Alpha-aspartyl dipeptidase Peptidase E                                                       | 325.801427 | -1.7621268 | 0.15652848 | -11.257547 | 6.49E-28   |
| Multidrug resistance protein MdtE                                                            | 931.180602 | -1.7659681 | 0.21563453 | -8.1896347 | 3.32E-15   |
| Probable glutamate/gamma-aminobutyrate antiporter                                            | 11322.0329 | -1.7779415 | 0.31954394 | -5.5639969 | 1.56E-07   |
| Nitrite reductase [NAD(P)H] large subunit                                                    | 2705.79571 | -1.7818928 | 0.22996391 | -7.7485758 | 1.05E-13   |
| Phosphoribosylamine-glycine ligase                                                           | 11410.7306 | -1.7969817 | 0.15740635 | -11.416196 | 1.11E-28   |
| Ni%2CFe-hydrogenase I cytochrome b subunit                                                   | 487.816901 | -1.815933  | 0.15841142 | -11.463397 | 6.66E-29   |
| Carbamate kinase                                                                             | 57.3154047 | -1.8244707 | 0.28242995 | -6.4599052 | 8.22E-10   |
| Protein YjgF%2C putative endoribonuclease L-PSP                                              | 1474.6349  | -1.8257228 | 0.17107848 | -10.671844 | 3.58E-25   |
| Protein YjgK%2C linked to biofilm formation                                                  | 476.040231 | -1.8309906 | 0.19758906 | -9.2666594 | 3.34E-19   |
| Chaperone protein DnaJ                                                                       | 9259.38364 | -1.8678395 | 0.17934634 | -10.414707 | 5.00E-24   |
| Homoserine kinase                                                                            | 29302.701  | -1.8692009 | 0.16607775 | -11.254975 | 6.64E-28   |
| Anthraniolate synthase%2C aminase component                                                  | 18852.2887 | -1.8706441 | 0.48791499 | -3.833955  | 0.00045855 |
| Malonyl CoA-acyl carrier protein transacylase                                                | 25289.8642 | -1.8842381 | 0.30745833 | -6.1284341 | 6.29E-09   |
| Formate dehydrogenase H                                                                      | 5989.87058 | -1.8893878 | 0.15941172 | -11.852252 | 7.93E-31   |
| Threonine synthase                                                                           | 34558.3541 | -1.8903526 | 0.17668062 | -10.699264 | 2.71E-25   |
| Nitrite transporter NirC                                                                     | 117.522632 | -1.9044671 | 0.2940535  | -6.4766009 | 7.38E-10   |
| PTS system%2C mannose-specific IIC component                                                 | 13820.4435 | -1.9520173 | 0.14443646 | -13.514713 | 7.87E-40   |
| Oligogalacturonate lyase                                                                     | 250.064775 | -1.9537309 | 0.20212081 | -9.6661542 | 7.85E-21   |
| Starvation lipoprotein Slp                                                                   | 694.84668  | -1.9559104 | 0.30610839 | -6.3896008 | 1.28E-09   |
| FIG00638501: hypothetical protein                                                            | 7.87699125 | -1.9637192 | 0.59901082 | -3.27827   | 0.00312741 |
| Glutamate decarboxylase                                                                      | 4773.04581 | -1.9639079 | 0.33393114 | -5.8811763 | 2.65E-08   |

|                                                                                                                                  |            |            |            |            |            |
|----------------------------------------------------------------------------------------------------------------------------------|------------|------------|------------|------------|------------|
| Hypothetical protein YdjY                                                                                                        | 133.220993 | -1.9686225 | 0.21950813 | -8.9683353 | 4.91E-18   |
| Arginine deiminase                                                                                                               | 76.141694  | -1.9722576 | 0.31188071 | -6.3237565 | 1.93E-09   |
| Cyd operon protein YbgT                                                                                                          | 4703.58337 | -1.9771357 | 0.17079082 | -11.576358 | 1.86E-29   |
| Beta-galactosidase                                                                                                               | 13545.1318 | -1.9986595 | 0.11401105 | -17.530401 | 1.73E-66   |
| Pyruvate formate-lyase                                                                                                           | 358753.342 | -2.0143361 | 0.14623426 | -13.774721 | 2.38E-41   |
| Putative polyketide synthase                                                                                                     | 10968.3207 | -2.0155229 | 0.16666036 | -12.093595 | 5.08E-32   |
| PTS system%2C mannose-specific IIA component                                                                                     | 18225.998  | -2.0221607 | 0.14084893 | -14.356948 | 7.79E-45   |
| Transcriptional regulator of catabolic arginine decarboxylase (adiA)                                                             | 1565.48873 | -2.0238997 | 0.18577996 | -10.894069 | 3.40E-26   |
| Isoaspartyl dipeptidase                                                                                                          | 4577.08904 | -2.0361337 | 0.11532086 | -17.656248 | 2.27E-67   |
| Lysine decarboxylase%2C inducible                                                                                                | 13953.3001 | -2.0372624 | 0.19122989 | -10.653472 | 4.30E-25   |
| Nitrite reductase [NAD(P)H] small subunit                                                                                        | 186.4948   | -2.0541624 | 0.27379018 | -7.5026882 | 6.57E-13   |
| Formate hydrogenlyase subunit 3                                                                                                  | 1240.4963  | -2.0651306 | 0.20509894 | -10.068948 | 1.67E-22   |
| Butyryl-CoA dehydrogenase                                                                                                        | 23669.6178 | -2.0740465 | 0.21449726 | -9.669338  | 7.64E-21   |
| [NiFe] hydrogenase nickel incorporation-associated protein HypB                                                                  | 764.781344 | -2.0760384 | 0.18115748 | -11.459855 | 6.89E-29   |
| Cobalt/zinc/cadmium efflux RND transporter%2C membrane fusion protein%2C CzcB family                                             | 1999.91669 | -2.0914089 | 0.32317241 | -6.4714957 | 7.63E-10   |
| Outer membrane porin protein NmpC precursor                                                                                      | 7694.05549 | -2.0968751 | 0.19933224 | -10.519498 | 1.70E-24   |
| Chaperone HdeB                                                                                                                   | 11097.0554 | -2.0971941 | 0.23496632 | -8.9255096 | 7.07E-18   |
| hypothetical protein                                                                                                             | 5922.36954 | -2.0987739 | 0.20181145 | -10.399677 | 5.83E-24   |
| Long-chain-fatty-acid--CoA ligase                                                                                                | 79680.9402 | -2.1086951 | 0.20975347 | -10.053207 | 1.93E-22   |
| Glutamate decarboxylase                                                                                                          | 2481.54768 | -2.1097305 | 0.32754183 | -6.4411025 | 9.26E-10   |
| Flagellar biosynthesis protein FlhB                                                                                              | 1399.99261 | -2.1161752 | 0.18879738 | -11.208711 | 1.10E-27   |
| Putative 3-hydroxyacyl-coa dehydrogenase                                                                                         | 20195.1593 | -2.121575  | 0.21292459 | -9.9639735 | 4.65E-22   |
| Lysine/cadaverine antiporter membrane protein CadB                                                                               | 4885.15575 | -2.1266738 | 0.20692008 | -10.277755 | 2.03E-23   |
| iron aquisition yersiniabactin synthesis enzyme (lrp2)                                                                           | 28104.8183 | -2.1275306 | 0.17703823 | -12.017351 | 1.24E-31   |
| Formate dehydrogenase H                                                                                                          | 2047.1166  | -2.1351277 | 0.1681008  | -12.701473 | 2.92E-35   |
| [NiFe] hydrogenase nickel incorporation protein HypA                                                                             | 115.673416 | -2.1387564 | 0.24496285 | -8.730942  | 3.77E-17   |
| [NiFe] hydrogenase metallocenter assembly protein HypC                                                                           | 137.543912 | -2.1595467 | 0.24121408 | -8.9528218 | 5.61E-18   |
| PTS system%2C mannose-specific IID component                                                                                     | 17565.2627 | -2.1845834 | 0.15324631 | -14.255374 | 3.12E-44   |
| Cation efflux system protein CusC precursor                                                                                      | 567.439953 | -2.1872102 | 0.26006798 | -8.410148  | 5.60E-16   |
| Pyruvate formate-lyase                                                                                                           | 68667.0007 | -2.1917815 | 0.17451078 | -12.559577 | 1.72E-34   |
| FIG139552: Putative protease                                                                                                     | 257.708652 | -2.2196477 | 0.22706607 | -9.7753388 | 2.81E-21   |
| LSU ribosomal protein L31p @ LSU ribosomal protein L31p%2C zinc-dependent                                                        | 1714.63511 | -2.2201128 | 0.1502734  | -14.773824 | 1.93E-47   |
| Chaperone HdeA                                                                                                                   | 10150.8337 | -2.2645779 | 0.19724481 | -11.481052 | 5.51E-29   |
| Formate hydrogenlyase regulatory protein HycA                                                                                    | 277.109119 | -2.2692674 | 0.21762194 | -10.427567 | 4.39E-24   |
| Formate hydrogenlyase maturation protein hycH                                                                                    | 481.959467 | -2.2827702 | 0.1790553  | -12.748967 | 1.61E-35   |
| Phosphoribosylaminoimidazole-succinocarboxamide synthase                                                                         | 6500.99484 | -2.2970927 | 0.14116536 | -16.272354 | 2.29E-57   |
| Formate hydrogenlyase subunit 2                                                                                                  | 396.4564   | -2.3087067 | 0.24781379 | -9.3162962 | 2.13E-19   |
| Putative TonB dependent outer membrane receptor                                                                                  | 4326.94692 | -2.3151381 | 0.16738862 | -13.830917 | 1.12E-41   |
| Chaperone protein HtpG                                                                                                           | 32280.7139 | -2.3167814 | 0.30782403 | -7.5263176 | 5.56E-13   |
| Chaperone protein DnaK                                                                                                           | 123871.375 | -2.317084  | 0.20852298 | -11.111888 | 3.17E-27   |
| Putative fimbrial-like protein                                                                                                   | 91.4889482 | -2.3243547 | 0.24506505 | -9.4846436 | 4.43E-20   |
| Arginine/agmatine antiporter                                                                                                     | 857.259125 | -2.3267614 | 0.14432297 | -16.121907 | 2.57E-56   |
| Orf2                                                                                                                             | 1061.7772  | -2.3409036 | 0.2015262  | -11.615878 | 1.18E-29   |
| FIG00638598: hypothetical protein                                                                                                | 390.330634 | -2.3497831 | 0.24266414 | -9.6832727 | 6.72E-21   |
| Putative thiosulfate sulfurtransferase ynjE                                                                                      | 362.685682 | -2.3793692 | 0.20858908 | -11.046969 | 1.23E-28   |
| Heat shock protein 60 family chaperone GroEL                                                                                     | 107336.349 | -2.4124887 | 0.31640716 | -7.6246337 | 2.69E-13   |
| Arginine decarboxylase%2C catabolic                                                                                              | 681.932066 | -2.425432  | 0.15407403 | -15.741991 | 9.46E-54   |
| Molybdenum transport system protein ModD                                                                                         | 1055.43129 | -2.4454184 | 0.20545944 | -11.902195 | 4.56E-31   |
| Flagellar biosynthesis protein FlIP                                                                                              | 558.366051 | -2.5079391 | 0.33449368 | -7.4977174 | 6.80E-13   |
| Formate hydrogenlyase subunit 7                                                                                                  | 991.54509  | -2.560522  | 0.19099325 | -13.406348 | 3.37E-39   |
| 3-oxoacyl-[acyl-carrier-protein] synthase                                                                                        | 81727.0419 | -2.5676042 | 0.31394004 | -8.1786451 | 3.63E-15   |
| Anthranilate synthase%2C amidotransferase component                                                                              | 37239.0527 | -2.5798749 | 0.42850527 | -6.0206374 | 1.18E-08   |
| ID=gene:EBG00000313296                                                                                                           | 903.40378  | -2.5832904 | 0.97504497 | -2.6494064 | 0.0194111  |
| ClpB protein                                                                                                                     | 53476.711  | -2.589505  | 0.22008495 | -11.765934 | 2.18E-30   |
| Flagellar biosynthesis protein FlIQ                                                                                              | 171.287614 | -2.5938519 | 0.29335129 | -8.8421358 | 1.43E-17   |
| Heat shock protein 60 family co-chaperone GroES                                                                                  | 6626.40999 | -2.6064747 | 0.38202264 | -6.8228278 | 7.84E-11   |
| Putative inner membrane protein                                                                                                  | 8136.61086 | -2.6143333 | 0.1988044  | -13.150279 | 9.55E-38   |
| Formate hydrogenlyase subunit 4                                                                                                  | 655.713412 | -2.6151044 | 0.19806179 | -13.203477 | 4.83E-38   |
| Uptake hydrogenase large subunit                                                                                                 | 1242.38598 | -2.6456137 | 0.20182938 | -13.108169 | 1.65E-37   |
| NAD-dependent glyceraldehyde-3-phosphate dehydrogenase                                                                           | 193948.443 | -2.6923533 | 0.15873883 | -16.960899 | 2.91E-62   |
| Cation efflux system protein CusF precursor                                                                                      | 623.49982  | -2.7279622 | 0.3530247  | -7.7273976 | 1.24E-13   |
| Flagellar protein FlHE                                                                                                           | 517.64418  | -2.7285791 | 0.18448661 | -14.79012  | 1.57E-47   |
| Outer membrane protein W precursor                                                                                               | 2316.3842  | -2.7773075 | 0.19751437 | -14.061293 | 4.64E-43   |
| Putative amidase                                                                                                                 | 7885.36625 | -2.8123884 | 0.20371392 | -13.805578 | 1.57E-41   |
| Formate hydrogenlyase subunit 5                                                                                                  | 1820.12224 | -2.8146035 | 0.18282901 | -15.394731 | 1.87E-51   |
| Formate hydrogenlyase complex 3 iron-sulfur protein%3B Formate hydrogenlyase subunit 6%3B Ni%2CFe-hydrogenase III medium subunit | 563.447067 | -2.8193792 | 0.21155794 | -13.326747 | 9.69E-39   |
| Flagellar biosynthesis protein FlIQ                                                                                              | 1620.4369  | -2.8211608 | 0.19765066 | -14.27347  | 2.48E-44   |
| Flagellar biosynthesis protein FlhA                                                                                              | 4217.51137 | -2.8370317 | 0.18257185 | -15.539262 | 2.07E-52   |
| Flagellar motor switch protein FlIM                                                                                              | 4014.31537 | -2.9005574 | 0.20337047 | -14.262431 | 2.86E-44   |
| Uptake hydrogenase small subunit precursor                                                                                       | 745.255356 | -2.920793  | 0.23586248 | -12.383458 | 1.52E-33   |
| iron aquisition yersiniabactin synthesis enzyme (lrp2)                                                                           | 10795.3113 | -2.9368708 | 0.19827226 | -14.812313 | 1.18E-47   |
| Aldose 1-epimerase family protein YeaD                                                                                           | 6154.07077 | -2.949278  | 0.16557042 | -17.812831 | 1.66E-68   |
| iron aquisition yersiniabactin synthesis enzyme (lrp2)                                                                           | 5223.38697 | -2.9963933 | 0.23262019 | -12.881054 | 3.09E-36   |
| Flagellar protein FlgI [peptidoglycan hydrolase]                                                                                 | 7019.86299 | -3.0435253 | 0.20476373 | -14.863596 | 5.60E-48   |
| Putative membrane protein                                                                                                        | 597.818237 | -3.0716277 | 0.17852316 | -17.205765 | 4.55E-64   |
| FIG00638267: hypothetical protein                                                                                                | 343.183998 | -3.1449989 | 0.36337957 | -8.6548589 | 7.14E-17   |
| Flagellar biosynthesis protein FlIL                                                                                              | 1710.75312 | -3.146588  | 0.19020061 | -16.543523 | 2.81E-59   |
| Flagellar motor switch protein FlIN                                                                                              | 2724.16025 | -3.2216276 | 0.20544999 | -15.680836 | 2.42E-53   |
| Flagellum-specific ATP synthase FlII                                                                                             | 5324.12006 | -3.2311566 | 0.2168875  | -14.897846 | 3.43E-48   |
| FIG00637915: hypothetical protein                                                                                                | 906.051366 | -3.2514227 | 0.16676673 | -19.496831 | 4.60E-82   |
| Flagellar P-ring protein FlgI                                                                                                    | 10441.2703 | -3.2642663 | 0.19394444 | -16.830935 | 2.45E-61   |
| ID=gene:EBG00000313254                                                                                                           | 76.7034261 | -3.2966835 | 1.23129509 | -2.6774114 | 0.01806533 |
| Flagellar assembly protein FlIH                                                                                                  | 2809.03859 | -3.3279537 | 0.23036064 | -14.446711 | 2.22E-45   |
| Indole-3-glycerol phosphate synthase                                                                                             | 32447.8571 | -3.3498974 | 0.33245003 | -10.076394 | 1.55E-22   |
| Flagellar protein FlII                                                                                                           | 1030.66515 | -3.4204634 | 0.21911198 | -15.610572 | 7.12E-53   |
| Flagellar M-ring protein FlIF                                                                                                    | 4928.74309 | -3.4340898 | 0.21564995 | -15.924371 | 5.64E-55   |
| FIG00638357: hypothetical protein                                                                                                | 343.366424 | -3.4424004 | 0.38906526 | -8.847874  | 1.37E-17   |
| Flagellar L-ring protein FlgH                                                                                                    | 7739.87682 | -3.4950108 | 0.21321877 | -16.391666 | 3.35E-58   |
| Flagellar motor switch protein FlIG                                                                                              | 6325.61724 | -3.5160714 | 0.22703111 | -15.487179 | 4.55E-52   |
| Flagellar hook-basal body complex protein FlIE                                                                                   | 597.932173 | -3.5525533 | 0.36294437 | -9.7881482 | 2.49E-21   |
| Flagellar hook-length control protein FlIK                                                                                       | 4523.16488 | -3.5605286 | 0.31051868 | -11.466391 | 6.48E-29   |
| Flagellar basal-body P-ring formation protein FlGA                                                                               | 5051.67217 | -3.6678276 | 0.31403439 | -11.6797   | 5.89E-30   |
| Flagellar basal-body rod protein FlGG                                                                                            | 24111.2685 | -3.7415964 | 0.21099888 | -17.732779 | 6.15E-68   |
| Lead%2C cadmium%2C zinc and mercury transporting ATPase                                                                          | 6699.95227 | -3.788936  | 0.19567563 | -19.363352 | 5.72E-81   |
| Flagellar hook protein FlGE                                                                                                      | 65563.9508 | -3.9362909 | 0.31071108 | -12.668653 | 4.39E-35   |
| Flagellar basal-body rod modification protein FlGD                                                                               | 24897.8125 | -3.9616281 | 0.29750919 | -13.315986 | 1.11E-38   |
| Flagellar basal-body rod protein FlGF                                                                                            | 21237.3832 | -3.9817416 | 0.22587525 | -17.628056 | 3.38E-67   |
| Flagellar basal-body rod protein FlGC                                                                                            | 12613.6773 | -4.0730441 | 0.29931852 | -13.607725 | 2.27E-40   |
| Tryptophan synthase alpha chain                                                                                                  | 49533.8783 | -4.1313597 | 0.32900015 | -12.557318 | 1.75E-34   |
| Tryptophan synthase beta chain                                                                                                   | 80187.7869 | -4.1440796 | 0.32189511 | -12.874006 | 3.35E-36   |
| Flagellar basal-body rod protein FlGB                                                                                            | 7082.29593 | -4.1773211 | 0.36459885 | -11.457276 | 7.05E-29   |
| Aspartate carbamoyltransferase regulatory chain (PyrI)                                                                           | 3585.53228 | -4.3553677 | 0.22538558 | -19.324074 | 1.14E-80   |
| Aspartate carbamoyltransferase                                                                                                   | 5442.73045 | -4.84097   | 0.22032484 | -21.971967 | 2.53E-104  |

**Supplemental Table 1: Statistically Differentially Expressed Genes LB**

| Gene Description                                                                                                                  |
|-----------------------------------------------------------------------------------------------------------------------------------|
| LSU ribosomal protein L36p                                                                                                        |
| LSU ribosomal protein L31p @ LSU ribosomal protein L31p%2C zinc-independent                                                       |
| Candidate zinc-binding lipoprotein ZinT                                                                                           |
| FIG00638682: hypothetical protein                                                                                                 |
| membrane%3B Transport of small molecules: Cations                                                                                 |
| Putative metal chaperone%2C involved in Zn homeostasis%2C GTPase of COG0523 family                                                |
| Zinc ABC transporter%2C periplasmic-binding protein ZnuA                                                                          |
| FIG01045439: hypothetical protein                                                                                                 |
| FIG01220641: hypothetical protein                                                                                                 |
| Sulfite reductase [NADPH] flavoprotein alpha-component                                                                            |
| Sulfate adenylyltransferase subunit 2                                                                                             |
| Cell wall endopeptidase%2C family M23/M37                                                                                         |
| Sulfate adenylyltransferase subunit 1                                                                                             |
| Zinc ABC transporter%2C ATP-binding protein ZnuC                                                                                  |
| Sulfite reductase [NADPH] hemoprotein beta-component                                                                              |
| Sulfate and thiosulfate binding protein CysP                                                                                      |
| Zinc ABC transporter%2C inner membrane permease protein ZnuB                                                                      |
| Protein ygiW precursor                                                                                                            |
| Adenylylsulfate kinase                                                                                                            |
| Sulfate transport system permease protein CysT                                                                                    |
| Phosphoadenylyl-sulfate reductase [thioredoxin]                                                                                   |
| Carbon starvation induced protein CsiD                                                                                            |
| Acetyl-coenzyme A synthetase                                                                                                      |
| Sulfate and thiosulfate import ATP-binding protein CysA                                                                           |
| Succinylornithine transaminase                                                                                                    |
| Methylthioribose-1-phosphate isomerase                                                                                            |
| Succinylglutamic semialdehyde dehydrogenase                                                                                       |
| Enoyl-CoA hydratase                                                                                                               |
| gamma-aminobutyrate (GABA) permease                                                                                               |
| Arginine N-succinyltransferase                                                                                                    |
| Cysteine synthase                                                                                                                 |
| 5-methylthioribose kinase                                                                                                         |
| L-fucose phosphate aldolase                                                                                                       |
| Sulfate transport system permease protein CysW                                                                                    |
| Uronate isomerase                                                                                                                 |
| Iso citrate lyase                                                                                                                 |
| 3-ketoacyl-CoA thiolase                                                                                                           |
| putative integral membrane protein                                                                                                |
| Malate synthase                                                                                                                   |
| Gamma-aminobutyrate:alpha-ketoglutarate aminotransferase                                                                          |
| Succinylglutamate desuccinylase                                                                                                   |
| PTS system%2C fructose-specific IIB component                                                                                     |
| Taurine-binding periplasmic protein TauA                                                                                          |
| hypothetical protein                                                                                                              |
| L-2-hydroxyglutarate oxidase                                                                                                      |
| Altronate hydrolase                                                                                                               |
| Transcriptional repressor of PutA and PutP / Proline dehydrogenase                                                                |
| Putative cytochrome oxidase subunit                                                                                               |
| Succinylarginine dihydrolase                                                                                                      |
| Putative exported protein                                                                                                         |
| Succinate-semialdehyde dehydrogenase [NADP+]                                                                                      |
| PTS system%2C N-acetylglucosamine-specific IIB component                                                                          |
| Starvation sensing protein RspA                                                                                                   |
| hypothetical protein                                                                                                              |
| Osmotically inducible protein OsmY                                                                                                |
| FIG00641190: hypothetical protein                                                                                                 |
| Respiratory nitrate reductase beta chain                                                                                          |
| Periplasmic protein related to spheroblast formation                                                                              |
| Glycerol-3-phosphate ABC transporter%2C permease protein UgpE (TC 3.A.1.1.3)                                                      |
| FIG00639131: hypothetical protein                                                                                                 |
| FIG00638909: hypothetical protein                                                                                                 |
| Butyryl-CoA dehydrogenase                                                                                                         |
| aconitate hydratase                                                                                                               |
| Protein Ycgl                                                                                                                      |
| FIG00638803: hypothetical protein                                                                                                 |
| Gamma-glutamyltranspeptidase                                                                                                      |
| D-mannonate oxidoreductase                                                                                                        |
| Mobile element protein                                                                                                            |
| Protease VII (OmpT) precursor                                                                                                     |
| Phosphate starvation-inducible protein PhoH%2CPredicted ATPase                                                                    |
| Protein yciF                                                                                                                      |
| CsiR%2C transcriptional repressor of CsiD                                                                                         |
| Glycerol-3-phosphate ABC transporter%2C ATP-binding protein UgpC (TC 3.A.1.1.3)                                                   |
| Respiratory nitrate reductase alpha chain                                                                                         |
| Branched-chain amino acid ABC transporter%2C amino acid-binding protein (TC 3.A.1.4.1)                                            |
| Succinyl-CoA ligase [ADP-forming] alpha chain                                                                                     |
| Malate dehydrogenase                                                                                                              |
| Iso citrate dehydrogenase [NADP]                                                                                                  |
| Citrate synthase (si)                                                                                                             |
| Aldehyde dehydrogenase A                                                                                                          |
| Manganese superoxide dismutase                                                                                                    |
| Alkyl hydroperoxide reductase protein C                                                                                           |
| Glycerol-3-phosphate ABC transporter%2C permease protein UgpA (TC 3.A.1.1.3)                                                      |
| L-cystine uptake protein TcyP                                                                                                     |
| 6-phosphofructokinase class II                                                                                                    |
| Putative type IV pilin protein precursor                                                                                          |
| Dihydropyrimidine succinyltransferase component (E2) of 2-oxoglutarate dehydrogenase complex                                      |
| Two-component system response regulator QseB                                                                                      |
| Pyruvate oxidase [ubiquinone%2C cytochrome]                                                                                       |
| FIG00641652: hypothetical protein                                                                                                 |
| Malate synthase G                                                                                                                 |
| FIG00638451: hypothetical protein                                                                                                 |
| Nicotinamidase family protein YcaC                                                                                                |
| Sialic acid-induced transmembrane protein YjHt(NanM)%2C possible mutarotase                                                       |
| TonB-dependent receptor%3B Outer membrane receptor for ferrienterochelin and colicins                                             |
| Dipeptide-binding ABC transporter%2C periplasmic substrate-binding component (TC 3.A.1.5.2)%3B Putative hemin-binding lipoprotein |
| Protein involved in stability of MscS mechanosensitive channel                                                                    |
| Glycerol-3-phosphate ABC transporter%2C periplasmic glycerol-3-phosphate-binding protein (TC 3.A.1.1.3)                           |
| Methylglyoxal reductase%2C acetol producing                                                                                       |
| Indole-3-glycerol phosphate synthase                                                                                              |
| Catalase                                                                                                                          |
| Respiratory nitrate reductase delta chain                                                                                         |
| ABC transporter%2C periplasmic spermidine putrescine-binding protein PotD (TC 3.A.1.11.1)                                         |
| Putative oxidoreductase                                                                                                           |
| Protein yceI precursor                                                                                                            |
| Taurine transport ATP-binding protein TauB                                                                                        |
| FIG001196: Membrane protein YedZ                                                                                                  |

| baseMean   | log2FoldChar | lfcSE      | stat       | padj       |
|------------|--------------|------------|------------|------------|
| 1068.02483 | 11.261438    | 0.91037108 | 12.3701623 | 9.55E-33   |
| 2627.12354 | 9.8664289    | 0.65568914 | 15.0474184 | 1.16E-48   |
| 11391.4778 | 8.8760159    | 0.21518351 | 41.2485871 | 0          |
| 9438.70125 | 6.12794083   | 0.12948575 | 47.3252141 | 0          |
| 14259.3302 | 5.3308006    | 0.1170281  | 45.5514583 | 0          |
| 2849.90433 | 4.99273274   | 0.14554747 | 34.3031228 | 6.39E-255  |
| 7924.49141 | 4.89243475   | 0.11749363 | 41.6399991 | 0          |
| 3841.69524 | 3.95666619   | 0.16973718 | 23.3105448 | 1.96E-117  |
| 814.061428 | 3.25473356   | 0.1791345  | 18.1692164 | 4.56E-71   |
| 2521.42462 | 2.90899088   | 0.19965243 | 14.5702751 | 1.31E-45   |
| 4135.61485 | 2.8812242    | 0.17993749 | 16.012362  | 3.96E-55   |
| 3074.34986 | 2.71829861   | 0.11637982 | 23.3571304 | 7.55E-118  |
| 7127.60147 | 2.71193421   | 0.17159127 | 15.8046168 | 1.01E-53   |
| 3693.60668 | 2.68946747   | 0.11351162 | 23.6933236 | 3.19E-121  |
| 3569.58409 | 2.64705905   | 0.24792    | 10.6770692 | 2.27E-24   |
| 3875.75449 | 2.60464284   | 0.22651886 | 11.4985696 | 2.76E-28   |
| 1364.50995 | 2.43779296   | 0.13998662 | 17.4144712 | 2.91E-65   |
| 2077.26306 | 2.36865842   | 0.21149292 | 11.1997054 | 8.06E-27   |
| 1136.12398 | 2.32906311   | 0.19934645 | 11.6834943 | 3.51E-29   |
| 1607.44735 | 2.27802551   | 0.16612165 | 13.7129955 | 2.41E-40   |
| 1317.41363 | 2.23828947   | 0.22181389 | 10.0908445 | 9.48E-22   |
| 1826.97339 | 2.21907796   | 0.4559736  | 4.86668083 | 2.05E-05   |
| 2609.42832 | 2.19869052   | 0.16996545 | 3.54647267 | 0.00286902 |
| 5024.1552  | 2.18224971   | 0.18348423 | 11.8933912 | 3.06E-30   |
| 538.573682 | 2.12527058   | 0.6439936  | 3.0014241  | 0.0060185  |
| 8421.06708 | 2.11286367   | 0.25874052 | 8.16595593 | 2.95E-14   |
| 1416.10688 | 2.10632938   | 0.72683269 | 2.89795631 | 0.0175024  |
| 680.911748 | 2.10050748   | 0.64596624 | 3.25172952 | 0.00687019 |
| 2015.04709 | 2.09077542   | 0.44466949 | 4.70186386 | 4.02E-05   |
| 718.445569 | 2.08885977   | 0.62402086 | 3.34741977 | 0.00527571 |
| 19829.3464 | 2.0832434    | 0.11992132 | 17.3717523 | 5.57E-65   |
| 11008.7246 | 2.01166801   | 0.27381023 | 7.34694261 | 1.35E-11   |
| 3400.36349 | 2.01057627   | 0.2410617  | 8.34050496 | 7.29E-15   |
| 2803.72598 | 2.00888587   | 0.20019312 | 10.0347399 | 1.57E-21   |
| 1829.5085  | 1.98504086   | 0.23532986 | 8.4351423  | 3.49E-15   |
| 2101.78081 | 1.93145209   | 0.52570476 | 3.67402435 | 0.00189255 |
| 564.641056 | 1.89568094   | 0.64437163 | 2.94190626 | 0.01563409 |
| 1125.92174 | 1.84205924   | 0.21293042 | 8.65099162 | 5.65E-16   |
| 1415.52901 | 1.81210345   | 0.51177875 | 3.54079466 | 0.00291729 |
| 9180.41073 | 1.78121994   | 0.36482196 | 4.88243622 | 1.93E-05   |
| 687.984093 | 1.76089504   | 0.58890796 | 2.99010228 | 0.01395129 |
| 10.9106817 | 1.75181394   | 0.68599809 | 2.55361777 | 0.04061309 |
| 109.567541 | 1.73767354   | 0.28455099 | 6.1067211  | 3.69E-08   |
| 13.598651  | 1.73473656   | 0.64191572 | 2.70243662 | 0.02863213 |
| 3087.94084 | 1.70384445   | 0.35727949 | 4.76894004 | 3.05E-05   |
| 1832.03247 | 1.69715433   | 0.24404142 | 6.95436997 | 1.91E-10   |
| 16781.5205 | 1.68695679   | 0.382636   | 4.40877693 | 0.00013277 |
| 381.960432 | 1.67521857   | 0.23528839 | 7.11985219 | 6.45E-11   |
| 1366.56078 | 1.67147575   | 0.54813835 | 3.0493684  | 0.01196491 |
| 5862.7837  | 1.66179785   | 0.26364036 | 6.30327562 | 1.19E-08   |
| 8613.15485 | 1.64164037   | 0.26083286 | 6.2938402  | 1.23E-08   |
| 21.2179272 | 1.62725949   | 0.50022146 | 3.25307813 | 0.00684671 |
| 3008.29388 | 1.59247943   | 0.537787   | 2.96117129 | 0.01483311 |
| 18.4582904 | 1.58322965   | 0.55219258 | 2.86716935 | 0.01888269 |
| 30929.4812 | 1.57080791   | 0.25379423 | 6.18929711 | 2.32E-08   |
| 200.950534 | 1.53487248   | 0.32331191 | 4.74734283 | 3.33E-05   |
| 1960.62515 | 1.52686946   | 0.22391763 | 6.81888896 | 4.84E-10   |
| 730.811476 | 1.51145572   | 0.206833   | 7.30761392 | 1.76E-11   |
| 211.238016 | 1.48417496   | 0.31326441 | 4.73777074 | 3.46E-05   |
| 654.114322 | 1.47689533   | 0.37704878 | 3.9169874  | 0.00082628 |
| 177.305188 | 1.46387066   | 0.30825729 | 4.74885978 | 3.32E-05   |
| 1451.08355 | 1.44232409   | 0.45421093 | 3.17544997 | 0.00858615 |
| 7414.14958 | 1.43581349   | 0.44923422 | 3.19613564 | 0.00808582 |
| 524.581106 | 1.41563241   | 0.15038235 | 9.41355416 | 6.04E-19   |
| 29.9259296 | 1.39542091   | 0.4972401  | 2.80633222 | 0.02217767 |
| 5772.9777  | 1.3836001    | 0.21514852 | 6.43090693 | 5.58E-09   |
| 1434.01775 | 1.38315403   | 0.20604108 | 6.71300127 | 9.61E-10   |
| 59.9321731 | 1.37030281   | 0.34468124 | 3.97556543 | 0.00066738 |
| 6350.03433 | 1.36871194   | 0.19160368 | 7.14345319 | 5.50E-11   |
| 45430.2826 | 1.33728337   | 0.53461368 | 2.50140133 | 0.0458601  |
| 62.2118739 | 1.30861682   | 0.39130178 | 3.34426492 | 0.0053058  |
| 1222.37568 | 1.30588891   | 0.22025959 | 5.92886304 | 9.81E-08   |
| 1442.9002  | 1.28628557   | 0.35884433 | 3.58452251 | 0.00254337 |
| 4286.44943 | 1.2855264    | 0.19901657 | 6.45939369 | 4.77E-09   |
| 2484.98441 | 1.28316339   | 0.12737035 | 10.074271  | 1.09E-21   |
| 15425.992  | 1.27801076   | 0.36027383 | 3.54733164 | 0.00286433 |
| 23879.0419 | 1.27257876   | 0.39963171 | 3.18437883 | 0.00835737 |
| 92812.9484 | 1.27207279   | 0.35250168 | 3.60869993 | 0.00235688 |
| 26927.4065 | 1.26658213   | 0.23297992 | 5.43644328 | 1.38E-06   |
| 1050.26503 | 1.24616084   | 0.27293251 | 4.56582038 | 6.86E-05   |
| 14089.5909 | 1.24360044   | 0.1533485  | 8.10963536 | 4.60E-14   |
| 30110.2755 | 1.23785257   | 0.12829842 | 9.64822909 | 6.67E-20   |
| 148.812807 | 1.22439118   | 0.24422044 | 5.01346733 | 1.06E-05   |
| 2582.46568 | 1.22045155   | 0.17230883 | 7.08293103 | 8.00E-11   |
| 3139.2464  | 1.21601076   | 0.09020778 | 13.4801091 | 5.46E-39   |
| 16.3072723 | 1.21540512   | 0.49119616 | 2.47437834 | 0.04845037 |
| 17381.5397 | 1.20882189   | 0.43812355 | 2.75908907 | 0.02500505 |
| 120.160935 | 1.20188353   | 0.18208164 | 6.60079488 | 1.93E-09   |
| 21620.9479 | 1.19698021   | 0.20537881 | 5.82815822 | 1.75E-07   |
| 23.6424794 | 1.1702746    | 0.4452254  | 2.62849919 | 0.03407953 |
| 4557.12172 | 1.1702337    | 0.19523885 | 5.99385673 | 6.88E-08   |
| 6238.79169 | 1.15286019   | 0.23680253 | 4.86844549 | 2.04E-05   |
| 4739.52382 | 1.14257603   | 0.21320602 | 5.35902342 | 2.10E-06   |
| 2698.29586 | 1.13719189   | 0.16017823 | 7.09954093 | 7.37E-11   |
| 28528.8668 | 1.13675754   | 0.17242475 | 6.59277486 | 2.02E-09   |
| 6466.97565 | 1.11709275   | 0.10165851 | 10.9886794 | 7.86E-26   |
| 8004.49544 | 1.11302326   | 0.17653462 | 6.30484402 | 1.19E-08   |
| 1152.07914 | 1.11142016   | 0.16367334 | 7.69047774 | 5.76E-10   |
| 8312.70589 | 1.10855558   | 0.15161297 | 7.31174613 | 1.73E-11   |
| 112740.503 | 1.10777738   | 0.14734473 | 7.51826957 | 3.93E-12   |
| 4706.69961 | 1.10334057   | 0.22880372 | 4.82221428 | 2.47E-05   |
| 812.423721 | 1.09499256   | 0.19767795 | 5.5392751  | 8.05E-07   |
| 1252.73496 | 1.08401303   | 0.18665028 | 5.80772243 | 1.94E-07   |
| 1129.13667 | 1.07771512   | 0.19479197 | 5.53264649 | 8.32E-07   |
| 2659.9623  | 1.07688035   | 0.11145495 | 9.66202308 | 6.01E-20   |
| 180.590691 | 1.07256834   | 0.20380912 | 5.26261201 | 3.37E-06   |
| 542.266296 | 1.07211074   | 0.22659683 | 4.73135809 | 3.55E-05   |

|                                                                                                                  |            |            |            |            |            |
|------------------------------------------------------------------------------------------------------------------|------------|------------|------------|------------|------------|
| PTS system%2C N-acetylgalactosamine-specific IIC component                                                       | 53.1787274 | 1.07152697 | 0.34320226 | 3.1221443  | 0.00992719 |
| Mannonate dehydratase                                                                                            | 622.961526 | 1.06331919 | 0.23136617 | 4.59582834 | 6.24E-05   |
| FIG00637864: hypothetical protein                                                                                | 1132.49973 | 1.05557085 | 0.16570838 | 6.37005095 | 8.16E-09   |
| Anthranilate synthase%2C amidotransferase component                                                              | 144220.739 | 1.04739877 | 0.20574346 | 5.09079988 | 7.59E-06   |
| Isoaspartyl aminopeptidase                                                                                       | 3879.35763 | 1.04191784 | 0.11050675 | 9.42854446 | 5.39E-19   |
| Acidic protein msyB                                                                                              | 2591.27571 | 1.04061024 | 0.22595695 | 4.60534733 | 5.98E-05   |
| Probable zinc protease ppgL                                                                                      | 1133.17772 | 1.04023419 | 0.20899904 | 4.97721985 | 1.24E-05   |
| periplasmic trehalase precursor                                                                                  | 2030.06883 | 1.03935543 | 0.19413362 | 5.35381484 | 2.15E-06   |
| Probable glutamate/gamma-aminobutyrate antiporter                                                                | 16816.198  | 1.03094494 | 0.25862492 | 3.98625528 | 0.00064616 |
| Tryptophan synthase beta chain                                                                                   | 244771.743 | 1.03055464 | 0.10609901 | 9.71314082 | 3.76E-20   |
| Superoxide dismutase [Cu-Zn] precursor                                                                           | 3796.91154 | 1.02564159 | 0.17740813 | 5.78125484 | 2.26E-07   |
| L-rhamnose mutarotase                                                                                            | 33.2914673 | 1.02449153 | 0.36179296 | 2.83170665 | 0.02072316 |
| D-mannonate oxidoreductase                                                                                       | 892.903825 | 1.01928929 | 0.24643243 | 4.13618158 | 0.00037585 |
| Succinyl-CoA ligase [ADP-forming] beta chain                                                                     | 12855.1784 | 1.01796288 | 0.39372622 | 2.58545873 | 0.03768626 |
| UPF0337 protein yjyJ                                                                                             | 1584.385   | 1.01642371 | 0.25874408 | 3.92829751 | 0.00079647 |
| Alkanesulfonate utilization operon LysR-family regulator Cbl                                                     | 299.513062 | 1.01476424 | 0.1950606  | 5.20230251 | 4.58E-06   |
| Sulfur acceptor protein SufE for iron-sulfur cluster assembly                                                    | 3755.51058 | 1.01412251 | 0.11534467 | 8.79210513 | 1.66E-16   |
| Nitrate/nitrite transporter                                                                                      | 866.604059 | 1.01321129 | 0.17354979 | 5.83815918 | 1.67E-07   |
| Putative carboxymethylenebionulidase                                                                             | 6062.21927 | 1.01257311 | 0.13060488 | 7.75294989 | 7.02E-13   |
| 4-alpha-glucanotransferase (amylomaltase)                                                                        | 3495.85816 | 1.01176922 | 0.21692491 | 5.66414499 | 4.70E-05   |
| Glycerol uptake facilitator protein                                                                              | 197.653646 | 1.00780149 | 0.26450273 | 3.81017424 | 0.00119475 |
| Nitric oxide reductase FIRd-NAD(+) reductase                                                                     | 267.156963 | 1.00386127 | 0.16056266 | 6.25214643 | 1.60E-08   |
| Putative sulfite oxidase subunit YedY                                                                            | 1459.65848 | 1.00369287 | 0.24346177 | 4.1225893  | 0.00039411 |
| Ribulosamine/erythruosamine 3-kinase potentially involved in protein deglycation                                 | 5092.07168 | 1.00219822 | 0.12509619 | 8.01142081 | 9.70E-14   |
| HTH-type transcriptional regulator gadW                                                                          | 758.832783 | 0.99425483 | 0.15790183 | 6.29666425 | 1.22E-08   |
| Isoctrate dehydrogenase phosphatase                                                                              | 392.947655 | 0.99416872 | 0.23703996 | 4.19409766 | 0.00030222 |
| 6-phosphogluconolactonase                                                                                        | 8508.0023  | 0.98259788 | 0.11772107 | 8.34683086 | 7.06E-15   |
| Maltodextrin phosphorylase                                                                                       | 4826.49194 | 0.98153302 | 0.224304   | 4.37590517 | 0.00015188 |
| Cysteine desulfurase                                                                                             | 15451.0563 | 0.98028081 | 0.11430438 | 8.57542051 | 1.07E-15   |
| FIG094199: Fumarylacetoacetate hydrolase                                                                         | 3335.17641 | 0.97598986 | 0.13380111 | 7.29433304 | 1.89E-11   |
| Glycoprotein-polysaccharide metabolism                                                                           | 6992.41939 | 0.97288552 | 0.11762692 | 8.27094312 | 1.28E-14   |
| FIG00642236: hypothetical protein                                                                                | 203.881632 | 0.96632423 | 0.22335053 | 4.32649167 | 0.00018221 |
| FIG00639909: hypothetical protein                                                                                | 22.6323356 | 0.96299921 | 0.37348576 | 2.57840942 | 0.03830027 |
| Maltose/maltodextrin ABC transporter%2C permease protein Malf                                                    | 188.434495 | 0.94946364 | 0.27299551 | 3.47794603 | 0.00350868 |
| Lactate-responsive regulator LldR in Enterobacteria%2C GntR family                                               | 413.623487 | 0.94042727 | 0.26961409 | 3.48804943 | 0.00342024 |
| FIG01046459: hypothetical protein                                                                                | 1286.44244 | 0.93972574 | 0.13948938 | 6.73689815 | 8.24E-10   |
| Stage V sporulation protein involved in spore cortex synthesis (SpoVR)                                           | 29501.5172 | 0.92008662 | 0.18256403 | 5.03980222 | 9.47E-06   |
| Ribosome hibernation protein YfiA                                                                                | 23856.7256 | 0.91996125 | 0.22345838 | 4.11692443 | 0.00040249 |
| Glucose dehydrogenase%2C PQQ-dependent                                                                           | 23701.1204 | 0.91703701 | 0.24151541 | 3.79701247 | 0.00125759 |
| Taurine transport system permease protein TauC                                                                   | 149.323254 | 0.91482717 | 0.19017914 | 4.81034456 | 2.57E-05   |
| Iron-sulfur cluster assembly protein SufD                                                                        | 17762.6168 | 0.91012554 | 0.13363719 | 6.81042128 | 5.07E-10   |
| Cytoplasmic protein YaiB                                                                                         | 331.092347 | 0.90989047 | 0.20100459 | 4.52671495 | 7.94E-05   |
| Flavohemoprotein (Hemoglobin-like protein) (Flavohemoglobin) (Nitric oxide dioxygenase)                          | 867.788351 | 0.90882046 | 0.17771693 | 5.11386539 | 6.85E-06   |
| Alcohol dehydrogenase                                                                                            | 2929.18273 | 0.90533913 | 0.14055883 | 6.44099798 | 5.29E-09   |
| Phage minor tail protein                                                                                         | 41.2541925 | 0.90030071 | 0.33274213 | 2.70570099 | 0.02840434 |
| Dipeptide-binding ABC transporter%2C periplasmic substrate-binding component (TC 3.A.1.5.2)                      | 29784.0733 | 0.89734082 | 0.13489295 | 6.65224391 | 1.41E-09   |
| D-allose ABC transporter%2C substrate-binding component                                                          | 107.100611 | 0.89456995 | 0.25792337 | 3.4683556  | 0.00361928 |
| Galactose/methyl galactoside ABC transport system%2C D-galactose-binding periplasmic protein MglB (TC 3.A.1.2.3) | 203.122499 | 0.89278031 | 0.23265451 | 3.83736523 | 0.00109274 |
| Respiratory nitrate reductase gamma chain                                                                        | 633.50164  | 0.8914331  | 0.16073095 | 5.4611987  | 7.79E-07   |
| Glycerophosphoryl diester phosphodiesterase                                                                      | 904.644134 | 0.88856732 | 0.15221653 | 5.84135941 | 1.65E-07   |
| Altronate oxidoreductase                                                                                         | 297.466462 | 0.8882198  | 0.23732094 | 3.74269452 | 0.00151442 |
| Thiol peroxidase%2C Tpx-type                                                                                     | 22280.2369 | 0.88761586 | 0.11766703 | 7.54345435 | 3.35E-12   |
| Phosphomethylpyrimidine kinase                                                                                   | 5992.71818 | 0.88387732 | 0.11199159 | 7.89235434 | 2.40E-13   |
| Phosphoenolpyruvate synthase                                                                                     | 16287.8479 | 0.88260096 | 0.21351769 | 4.13361993 | 0.00037917 |
| Alcohol dehydrogenase                                                                                            | 43202.9678 | 0.8816172  | 0.2376358  | 3.70995108 | 0.00168742 |
| Putrescine aminotransferase                                                                                      | 21521.2335 | 0.87829489 | 0.22196851 | 3.95684458 | 0.00071738 |
| Sulfate-binding protein Sbp                                                                                      | 233.858749 | 0.87591993 | 0.16872793 | 5.19131556 | 4.78E-06   |
| Propionate catabolism operon regulatory protein PrpR                                                             | 106.808994 | 0.87552145 | 0.28671112 | 3.05367111 | 0.01182186 |
| HTH-type transcriptional regulator gadX                                                                          | 1848.25765 | 0.87528026 | 0.17997906 | 4.86323378 | 2.08E-05   |
| Glutathione ABC transporter ATP-binding protein                                                                  | 4767.6915  | 0.87452737 | 0.10855697 | 8.05592998 | 6.88E-14   |
| Transketolase                                                                                                    | 43701.3055 | 0.87170514 | 0.20544042 | 4.24310439 | 0.00025051 |
| NAD-dependent glyceraldehyde-3-phosphate dehydrogenase                                                           | 10115.9129 | 0.86997551 | 0.21189955 | 4.1056033  | 0.00041839 |
| Glycolate permease                                                                                               | 182.71614  | 0.86919041 | 0.22217253 | 3.91223164 | 0.00084028 |
| 3-isopropylmalate dehydratase small subunit                                                                      | 1713.98864 | 0.86836383 | 0.11536298 | 7.52723126 | 3.73E-12   |
| Putrescine transport system permease protein PotH (TC 3.A.1.11.2)                                                | 2965.87386 | 0.8657165  | 0.14381057 | 6.01983929 | 5.95E-08   |
| Oxidoreductase%2C aldo/keto reductase family                                                                     | 5265.06673 | 0.86427689 | 0.07766419 | 11.1283834 | 1.72E-26   |
| N-acetylneuraminic acid outer membrane channel protein NanC                                                      | 93.643357  | 0.86028042 | 0.22028532 | 3.90530065 | 0.00085508 |
| Putative regulator                                                                                               | 191.715444 | 0.85409394 | 0.16539465 | 5.16397554 | 5.40E-06   |
| Putrescine transport ATP-binding protein PotA (TC 3.A.1.11.1)                                                    | 444.953844 | 0.84850123 | 0.19550597 | 4.34002717 | 0.00017317 |
| Iron-sulfur cluster assembly protein SufB                                                                        | 13273.7983 | 0.84794535 | 0.15443639 | 5.49058002 | 1.04E-06   |
| cysteine synthase B                                                                                              | 1139.40689 | 0.84475631 | 0.16561736 | 5.10065063 | 7.27E-06   |
| Hypothetical protein                                                                                             | 2484.27852 | 0.84048277 | 0.18959737 | 4.43298755 | 0.00011903 |
| Thiamin-phosphate pyrophosphorylase                                                                              | 18843.3323 | 0.84046754 | 0.17465871 | 4.81205623 | 2.56E-05   |
| 3-keto-L-gulonate 6-phosphate decarboxylase homolog                                                              | 77.5812469 | 0.83769285 | 0.29168218 | 2.87193703 | 0.01866508 |
| FIG00638524: hypothetical protein                                                                                | 1177.88358 | 0.8337447  | 0.17763587 | 4.6935604  | 4.17E-05   |
| Glucokinase                                                                                                      | 182.438409 | 0.83364681 | 0.22848555 | 3.64857568 | 0.00205784 |
| Fumarate hydratase class II                                                                                      | 1455.43511 | 0.83305044 | 0.19159584 | 4.34795674 | 0.0001693  |
| FIG00638143: hypothetical protein                                                                                | 43.3607078 | 0.82659785 | 0.30655234 | 2.69643301 | 0.02896738 |
| Maltose/maltodextrin ABC transporter%2C substrate binding periplasmic protein MalE                               | 303.28639  | 0.82443184 | 0.29922494 | 2.75522431 | 0.02525116 |
| Pyruvate-flavodoxin oxidoreductase                                                                               | 4776.32528 | 0.82376569 | 0.16536796 | 4.98141059 | 1.24E-05   |
| Fructose-bisphosphate aldolase class I                                                                           | 19385.5004 | 0.82272208 | 0.18143151 | 4.53461506 | 7.72E-05   |
| Serine protein kinase (prkA protein)%2C P-loop containing                                                        | 94077.1439 | 0.81941738 | 0.20012329 | 4.09456281 | 0.00043684 |
| Hydroxyethylthiazole kinase                                                                                      | 7682.90013 | 0.81842538 | 0.11531581 | 7.09725204 | 7.40E-11   |
| Acetolactate synthase small subunit                                                                              | 1122.4081  | 0.81784788 | 0.16151392 | 5.06363715 | 8.55E-06   |
| Catalase                                                                                                         | 11209.0546 | 0.81248564 | 0.13410001 | 6.05880383 | 4.75E-08   |
| Iron binding protein SufA for iron-sulfur cluster assembly                                                       | 3615.66715 | 0.80848831 | 0.12975768 | 6.23075507 | 1.81E-08   |
| Putrescine transport ATP-binding protein PotG (TC 3.A.1.11.2)                                                    | 5837.77425 | 0.80656064 | 0.14077471 | 5.72944261 | 2.97E-07   |
| Acetate permease ActP (cation/acetate symporter)                                                                 | 431.002767 | 0.80620407 | 0.21938043 | 3.67491344 | 0.00188927 |
| PhnB protein%3B putative DNA binding 3-demethylubiquinone-9 3-methyltransferase domain protein                   | 569.178925 | 0.80545335 | 0.13864461 | 5.8094819  | 1.93E-07   |
| 4-aminobutyraldehyde dehydrogenase                                                                               | 1389.39545 | 0.80243366 | 0.19392263 | 4.13790628 | 0.00037391 |
| FIG005189: putative transferase clustered with tellurite resistance proteins TehA/TehB                           | 1291.59402 | 0.80133008 | 0.17665513 | 4.53612695 | 7.69E-05   |
| L-sorbose 1-phosphate reductase                                                                                  | 124.796687 | 0.80084942 | 0.18964889 | 4.22280038 | 0.00026946 |
| Lysine-arginine-ornithine-binding periplasmic protein precursor (TC 3.A.1.3.1)                                   | 129.245027 | 0.80047638 | 0.26776129 | 2.98951495 | 0.01395257 |
| Phage tail assembly protein I                                                                                    | 227.750908 | 0.79997323 | 0.16327103 | 4.89966441 | 1.78E-05   |
| Probable secreted protein                                                                                        | 14007.0446 | 0.79710528 | 0.23091646 | 3.45192054 | 0.00382375 |
| D-mannonate oxidoreductase                                                                                       | 1466.86946 | 0.79496359 | 0.24993407 | 3.1806932  | 0.00845367 |
| Phosphoenolpyruvate-dihydroxyacetone phosphotransferase                                                          | 1211.54945 | 0.7943445  | 0.14615542 | 5.43493019 | 1.39E-06   |
| FIG00895798: hypothetical protein                                                                                | 10521.2699 | 0.79290542 | 0.15163409 | 5.22907082 | 4.02E-06   |
| Stationary phase inducible protein CsiE                                                                          | 2151.05488 | 0.79270199 | 0.18823518 | 4.21123187 | 0.00028087 |
| Glycosyl hydrolase YegX%2C family 25                                                                             | 518.341071 | 0.79254802 | 0.14233869 | 5.56804365 | 7.04E-07   |
| FIG00639204: hypothetical protein                                                                                | 236.91727  | 0.79250499 | 0.23246856 | 3.40908466 | 0.00437033 |
| Outer membrane porin protein NmpC precursor                                                                      | 5289.27893 | 0.78878965 | 0.26434625 | 2.98392605 | 0.01411669 |
| Iron-sulfur cluster assembly ATPase protein SufC                                                                 | 6659.93927 | 0.7844367  | 0.11962331 | 6.55755701 | 2.53E-09   |
| DNA-binding protein HU-alpha                                                                                     | 13622.339  | 0.78215984 | 0.12869575 | 6.07758865 | 4.39E-08   |
| Acetate kinase                                                                                                   | 147.084476 | 0.7820686  | 0.23239191 | 3.36530043 | 0.00501695 |
| Transcriptional regulator CsgD for 2nd curli operon                                                              | 467.244    | 0.78144677 | 0.15406263 | 5.07226673 | 8.21E-06   |
| Curli production assembly/transport component CsgE                                                               | 142.429019 | 0.77968201 | 0.22172971 | 3.51636235 | 0.00316457 |
| Phosphate starvation-inducible protein PsfI                                                                      | 1147.87985 | 0.77777964 | 0.16385079 | 4.74687756 | 3.33E-05   |
| L-xylulose 5-phosphate 3-epimerase                                                                               | 146.684965 | 0.77539107 | 0.22503883 | 3.44558785 | 0.0038909  |

|                                                                                 |            |            |            |            |            |
|---------------------------------------------------------------------------------|------------|------------|------------|------------|------------|
| Tagatose 1%2C6-bisphosphate aldolase                                            | 63.2406859 | 0.77398074 | 0.27464489 | 2.81811452 | 0.02147275 |
| Cardiolipin synthetase                                                          | 2168.00634 | 0.7735766  | 0.18036289 | 4.28900095 | 0.00021082 |
| Putative single stranded DNA-binding protein of prophage                        | 169.795166 | 0.77256091 | 0.2323359  | 3.32518958 | 0.00560304 |
| biofilm regulator BssR                                                          | 17910.2682 | 0.7706759  | 0.22608613 | 3.4087713  | 0.00437033 |
| Molybdenum cofactor biosynthesis protein MoaB                                   | 1994.98435 | 0.7695463  | 0.12771421 | 6.02553407 | 5.79E-08   |
| Biofilm PGA synthesis auxiliary protein PgaD                                    | 143.506329 | 0.76739605 | 0.19221577 | 3.99236778 | 0.00063241 |
| UPF0098 protein yb9b                                                            | 2108.80675 | 0.76543799 | 0.12510222 | 6.11850025 | 3.48E-08   |
| Salic acid-induced transmembrane protein YjHT(NanM)%2C possible mutarotase      | 445.185264 | 0.76515651 | 0.12628489 | 6.05897138 | 4.75E-08   |
| Xylanase                                                                        | 97.2514816 | 0.76462591 | 0.22983936 | 3.32678397 | 0.00557888 |
| Thiamin biosynthesis protein ThiC                                               | 40529.5064 | 0.76411076 | 0.14417558 | 5.29986252 | 2.79E-06   |
| Alcohol dehydrogenase                                                           | 2508.45095 | 0.7633305  | 0.16197869 | 4.71253644 | 3.84E-05   |
| Phosphonates transport ATP-binding protein PhnL                                 | 50.3196858 | 0.76215965 | 0.30240699 | 2.520311   | 0.04397162 |
| Glutamate decarboxylase                                                         | 1708.17142 | 0.76135837 | 0.24519186 | 3.10515345 | 0.01032641 |
| Putrescine ABC transporter putrescine-binding protein PotF (TC 3.A.1.11.2)      | 13422.0189 | 0.76068958 | 0.12801303 | 5.9422826  | 9.19E-08   |
| Inner membrane protein YhaH                                                     | 2573.81677 | 0.75501445 | 0.16496993 | 4.57667917 | 6.65E-05   |
| Tryptophan synthase alpha chain                                                 | 165388.489 | 0.7530484  | 0.10166899 | 7.40686386 | 8.88E-12   |
| Dethiobiotin synthetase                                                         | 1213.68314 | 0.7510686  | 0.16264588 | 4.61781501 | 5.69E-05   |
| Acetyl-CoA:acetoacetyl-CoA transferase%2C alpha subunit                         | 139.036908 | 0.7495795  | 0.21046191 | 3.56159224 | 0.00273982 |
| Glutamate Aspartate periplasmic binding protein precursor GltI (TC 3.A.1.3.4)   | 6369.26903 | 0.74888732 | 0.12872579 | 5.81769468 | 1.85E-07   |
| Molybdenum cofactor biosynthesis protein MoaC                                   | 2129.33079 | 0.74858086 | 0.13251657 | 5.64896027 | 4.60E-07   |
| Allantoinase                                                                    | 344.1296   | 0.74702585 | 0.17199957 | 4.34318448 | 0.00017162 |
| Glutamate decarboxylase                                                         | 7149.63316 | 0.74519393 | 0.25299503 | 2.9454884  | 0.01549827 |
| Heat shock protein 60 family chaperone GroEL                                    | 22657.5515 | 0.73543568 | 0.17201156 | 4.27550139 | 0.00022236 |
| Alpha%2Calpha-trehalose-phosphate synthase [UDP-forming]                        | 9085.1909  | 0.73446713 | 0.16812577 | 4.36855763 | 0.00015622 |
| Osmoprotectant ABC transporter permease protein YehY                            | 959.828471 | 0.73253809 | 0.17378246 | 4.21525917 | 0.00027725 |
| Proofreading thioesterase in enterobactin biosynthesis EntH                     | 2942.17046 | 0.73102098 | 0.10479243 | 6.9758947  | 1.68E-10   |
| Acetolactate synthase large subunit                                             | 806.927712 | 0.73023818 | 0.14626124 | 4.99269784 | 1.17E-05   |
| Enoyl-CoA hydratase                                                             | 1099.52339 | 0.72975733 | 0.22391238 | 3.25912002 | 0.00674717 |
| Uncharacterized membrane protein YqjD                                           | 7399.80432 | 0.72796945 | 0.15943744 | 4.56586259 | 6.86E-05   |
| Melibiose operon regulatory protein                                             | 716.81908  | 0.7268617  | 0.19587093 | 3.71092174 | 0.00168702 |
| Ethanolamine utilization polyhedral-body-like protein EutM                      | 77.6982565 | 0.72358229 | 0.2845779  | 2.54265102 | 0.04167153 |
| type 1 fimbriae regulatory protein FimB                                         | 308.281979 | 0.71745842 | 0.19828375 | 3.61834205 | 0.00228625 |
| Glucarate dehydratase                                                           | 1791.34538 | 0.71617579 | 0.11593835 | 6.17721222 | 2.44E-08   |
| NADP-dependent malic enzyme                                                     | 13429.5972 | 0.71564969 | 0.13698675 | 5.22422575 | 4.11E-06   |
| Oligopeptide transport system permease protein OppB (TC 3.A.1.5.1)              | 1807.41183 | 0.71547504 | 0.11029017 | 6.48720611 | 4.00E-09   |
| Hypothetical protein                                                            | 392.749599 | 0.71134105 | 0.13687877 | 5.19686906 | 4.66E-06   |
| Nicotinamidase/isochorismatase family protein                                   | 447.774196 | 0.70944478 | 0.14395065 | 4.92838896 | 1.57E-05   |
| ATP-dependent Clp protease ATP-binding subunit ClpA                             | 63453.5856 | 0.70940447 | 0.12986444 | 4.64265369 | 1.22E-06   |
| FIG00638953: hypothetical protein                                               | 2785.04607 | 0.7080274  | 0.18660656 | 3.79422559 | 0.00126939 |
| Thiazole biosynthesis protein ThiG                                              | 25737.6669 | 0.70715376 | 0.13982995 | 5.05724097 | 8.77E-06   |
| ABC transporter protein IroC                                                    | 224808.545 | 0.70429716 | 0.1481884  | 4.75271467 | 3.27E-05   |
| Flavoprotein wrbA                                                               | 19382.2963 | 0.70190911 | 0.14471329 | 4.850343   | 2.19E-05   |
| Isochorismatase                                                                 | 15758.9493 | 0.70034133 | 0.1524098  | 4.59512002 | 6.25E-05   |
| FIG00640525: hypothetical protein                                               | 653.064105 | 0.69818502 | 0.14026953 | 4.97745333 | 1.24E-05   |
| N-acetylgalactosamine 6-sulfate sulfatase (GALNS)                               | 96.2362981 | 0.69704914 | 0.20740724 | 3.36077538 | 0.00507051 |
| RNA signal recognition particle 4.5S RNA                                        | 301.402922 | 0.69664674 | 0.21324449 | 3.26689213 | 0.00660865 |
| Putative cytoplasmic protein                                                    | 578.624513 | 0.69493473 | 0.18220743 | 3.81397588 | 0.00117874 |
| UPF0229 protein YeaH                                                            | 23052.1395 | 0.69426839 | 0.18928642 | 3.66781939 | 0.00193253 |
| Phosphoenolpyruvate-dihydroxyacetone phosphotransferase                         | 738.261587 | 0.69317993 | 0.14839212 | 4.67127193 | 4.55E-05   |
| D-3-phosphoglycerate dehydrogenase                                              | 64.5163607 | 0.69153158 | 0.25461645 | 2.7159737  | 0.02763948 |
| 2-dehydro-3-deoxyglucarate aldolase                                             | 73.7924665 | 0.69025436 | 0.24603361 | 2.80552876 | 0.02217767 |
| DNA-directed RNA polymerase beta' subunit                                       | 93933.7365 | 0.68776304 | 0.13020786 | 5.28203946 | 3.06E-06   |
| Aldehyde dehydrogenase B                                                        | 1861.59373 | 0.68592773 | 0.20261538 | 3.38536851 | 0.00470495 |
| PTS system%2C N-acetylglucosamine-specific IIA component                        | 6930.97073 | 0.68384406 | 0.15418447 | 4.43523323 | 0.00011813 |
| Inner membrane protein                                                          | 4010.77767 | 0.68219085 | 0.15770686 | 4.32568914 | 0.00018239 |
| L-rhamnose isomerase                                                            | 63.825031  | 0.68075003 | 0.2505717  | 2.71678738 | 0.02759709 |
| Cytochrome B561                                                                 | 190.807298 | 0.67573954 | 0.15497499 | 4.36031353 | 0.00016089 |
| 2%2C3-dihydro-2%2C3-dihydroxybenzoate dehydrogenase                             | 6728.0338  | 0.67570773 | 0.12044712 | 5.60994993 | 5.63E-07   |
| Ethanolamine ammonia-lyase heavy chain                                          | 659.167051 | 0.67568615 | 0.14317702 | 4.71923598 | 3.74E-05   |
| Thiazole biosynthesis protein ThiH                                              | 29297.1094 | 0.6753436  | 0.13252721 | 5.0958863  | 7.42E-06   |
| FIG00639826: hypothetical protein                                               | 645.771609 | 0.67373247 | 0.14815686 | 4.54742669 | 7.39E-05   |
| 2-ketoadonate reductase%2C broad specificity                                    | 2316.72855 | 0.67332261 | 0.11932832 | 5.64260548 | 4.75E-07   |
| Osmoprotectant ABC transporter binding protein YehZ                             | 1472.57684 | 0.67000152 | 0.13826474 | 4.84578733 | 2.22E-05   |
| Lipoprotein Bor                                                                 | 68.7747028 | 0.66969001 | 0.27147722 | 2.46683687 | 0.04917958 |
| putative protein Paa%2C possibly involved in aromatic compounds catabolism      | 364.296426 | 0.66889405 | 0.18337997 | 3.6475851  | 0.00206224 |
| Lipid A biosynthesis (KDO) 2-[lauroyl]-lipid IVA acyltransferase                | 893.891499 | 0.66766685 | 0.11708454 | 5.70243373 | 3.41E-07   |
| AMP nucleosidase                                                                | 8399.41559 | 0.66657847 | 0.10537327 | 6.32587826 | 1.06E-08   |
| NAD synthetase                                                                  | 5248.38121 | 0.66258306 | 0.12856569 | 5.15365366 | 5.65E-06   |
| Maltose operon periplasmic protein MalM                                         | 228.646071 | 0.66207359 | 0.20036905 | 3.30427082 | 0.0059551  |
| NADH-ubiquinone oxidoreductase chain H                                          | 3138.79657 | 0.66154971 | 0.20116624 | 3.28857225 | 0.00622016 |
| Outer membrane protein A precursor                                              | 358252.837 | 0.66122482 | 0.15938441 | 4.14861673 | 0.00036109 |
| L-threonine 3-dehydrogenase                                                     | 9263.85865 | 0.65976845 | 0.13692178 | 4.8185794  | 2.48E-05   |
| Phage portal protein                                                            | 157.862556 | 0.65906803 | 0.17087624 | 3.85699052 | 0.00102454 |
| Putative Dihydrolipoamide dehydrogenase                                         | 1769.22881 | 0.65851698 | 0.15085315 | 4.36528491 | 0.00015791 |
| Uncharacterized protein ygiV                                                    | 249.951186 | 0.65815755 | 0.14333092 | 4.59187416 | 6.30E-05   |
| Dipeptide transport ATP-binding protein DppF (TC 3.A.1.5.2)                     | 1782.38613 | 0.65754576 | 0.14316144 | 4.5930368  | 6.29E-05   |
| Arabinose-proton symporter                                                      | 2314.72714 | 0.6564945  | 0.16157872 | 4.06300105 | 0.00048704 |
| hypothetical protein                                                            | 113.189353 | 0.65563708 | 0.22836734 | 2.87097569 | 0.01869275 |
| Inner membrane protein YqjK                                                     | 10776.3329 | 0.65452709 | 0.14974017 | 4.37108568 | 0.00015485 |
| FIG00643425: hypothetical protein                                               | 243.262943 | 0.65382542 | 0.18680428 | 3.50005589 | 0.00332656 |
| Threonine synthase                                                              | 5553.35347 | 0.65047009 | 0.1136244  | 5.72473942 | 3.03E-07   |
| Putative tail component of prophage CP-933K                                     | 94.6777234 | 0.64948543 | 0.2160735  | 3.00585416 | 0.0137692  |
| Chaperone protein hchA                                                          | 29340.1857 | 0.64933857 | 0.21226306 | 3.05912184 | 0.0116612  |
| Putative cytoplasmic protein USSD87A                                            | 64.1267368 | 0.64890447 | 0.24977929 | 2.59791141 | 0.03659691 |
| Aconitate hydratase 2                                                           | 33447.648  | 0.64427927 | 0.21205508 | 3.03826382 | 0.01227355 |
| Anaerobic nitric oxide reductase flavorubredoxin                                | 225.777288 | 0.64278697 | 0.18705871 | 3.43628454 | 0.00400085 |
| Co-activator of prophage gene expression IbrA                                   | 69.7849616 | 0.64111356 | 0.24080633 | 2.66236173 | 0.03127228 |
| Acetolactate synthase small subunit                                             | 172.312762 | 0.63811078 | 0.2054753  | 3.1055352  | 0.01032641 |
| 7-alpha-hydroxysteroid dehydrogenase                                            | 8659.94849 | 0.63681536 | 0.19650659 | 3.240682   | 0.00707661 |
| COG1457: Purine-cytosine permease and related proteins                          | 169.742904 | 0.63655669 | 0.17534128 | 3.63038695 | 0.0021971  |
| Ethanolamine utilization polyhedral-body-like protein EutK                      | 471.876755 | 0.63643117 | 0.18352517 | 3.46781405 | 0.00362106 |
| iron aquisition yersiniabactin synthesis enzyme (Irp1)%2Cpolyketide synthetase) | 347173.515 | 0.63614699 | 0.15636328 | 4.06839124 | 0.00047697 |
| HTH-type transcriptional regulator mlrA                                         | 1692.51274 | 0.63588096 | 0.15021133 | 4.2332424  | 0.00025915 |
| FIG00639943: hypothetical protein                                               | 2188.17643 | 0.63526096 | 0.15320197 | 4.14655857 | 0.00036348 |
| Glutaminase                                                                     | 2794.09487 | 0.63242851 | 0.17939333 | 3.52537366 | 0.0030727  |
| iron aquisition yersiniabactin synthesis enzyme (Irp1)%2Cpolyketide synthetase) | 414634.199 | 0.6272315  | 0.15776529 | 3.9757256  | 0.00066738 |
| Spermidine Putrescine ABC transporter permease component potC (TC_3.A.1.11.1)   | 219.45292  | 0.62441045 | 0.20757258 | 3.00815476 | 0.01331523 |
| Sulfur carrier protein ThiS                                                     | 4264.28729 | 0.623962   | 0.15107647 | 4.13010718 | 0.00038322 |
| Putative cytoplasmic protein                                                    | 148.277535 | 0.62317212 | 0.22353557 | 2.7877985  | 0.02322473 |
| Protein containing PTS-regulatory domain                                        | 87.6772724 | 0.62215136 | 0.24775719 | 2.5111334  | 0.04479808 |
| Transcription regulator [contains diacylglycerol kinase catalytic domain]       | 1278.81654 | 0.62142081 | 0.12127263 | 5.12416376 | 6.58E-06   |
| Putative RTX family exoprotein A gene                                           | 2954.49915 | 0.62030682 | 0.10347588 | 5.9946997  | 6.88E-08   |
| 6-phospho-beta-glucosidase                                                      | 205.867855 | 0.61859139 | 0.17217345 | 3.59283849 | 0.00248002 |
| Putrescine transport system permease protein PotI (TC 3.A.1.11.2)               | 2610.03372 | 0.61803672 | 0.15414052 | 4.00956688 | 0.00059463 |
| Antigen 43 precursor                                                            | 3497.4491  | 0.61482404 | 0.16272078 | 3.77839907 | 0.00134267 |
| UPF0410 protein YeaQ                                                            | 2122.1015  | 0.61310601 | 0.19055385 | 3.21749472 | 0.00757514 |
| Molybdenum cofactor biosynthesis protein MoaE                                   | 961.521718 | 0.61285698 | 0.12714928 | 4.81998011 | 2.48E-05   |
| Putative membrane protein YchH                                                  | 3031.91768 | 0.61279797 | 0.20806229 | 2.94526209 | 0.01549827 |
| Putative NAGC-like transcriptional regulator                                    | 246.916671 | 0.61269518 | 0.15341082 | 3.99381192 | 0.00062989 |

|                                                                                                     |            |            |            |            |            |
|-----------------------------------------------------------------------------------------------------|------------|------------|------------|------------|------------|
| Hypothetical protein GlcG in glycolate utilization operon                                           | 300.220031 | 0.60896335 | 0.21008993 | 2.89858425 | 0.0175024  |
| Transaldolase                                                                                       | 16188.035  | 0.60885936 | 0.18274894 | 3.33167099 | 0.0055205  |
| Putative transport protein                                                                          | 274.40707  | 0.60858366 | 0.19564052 | 3.11072408 | 0.01021953 |
| Di/tripeptide permease DtpB                                                                         | 750.782101 | 0.60605876 | 0.13884496 | 4.36500368 | 0.00015791 |
| Glutamate synthase [NADPH] small chain                                                              | 10671.5995 | 0.60407302 | 0.09473595 | 6.37638609 | 7.90E-09   |
| Glutamate Aspartate transport system permease protein GltK (TC 3.A.1.3.4)                           | 296.457286 | 0.60400713 | 0.18289565 | 3.30246848 | 0.00597701 |
| Inner membrane protein YbhQ                                                                         | 760.395416 | 0.60285895 | 0.17146812 | 3.51586613 | 0.00316457 |
| FIG00639237: hypothetical protein                                                                   | 12076.5991 | 0.59999232 | 0.21841077 | 2.74708206 | 0.02571894 |
| Ethanolamine ammonia-lyase light chain                                                              | 687.552765 | 0.59939453 | 0.16777466 | 3.57261655 | 0.0026487  |
| Large-conductance mechanosensitive channel                                                          | 18860.7233 | 0.59650531 | 0.14017812 | 4.25533817 | 0.00023899 |
| FIG00638157: hypothetical protein                                                                   | 2488.76325 | 0.59622763 | 0.18152201 | 3.28460245 | 0.00627427 |
| Quinone oxidoreductase                                                                              | 5215.81895 | 0.5942376  | 0.12680226 | 4.68633284 | 4.30E-05   |
| Phage EaA protein                                                                                   | 320.208351 | 0.59421561 | 0.14637225 | 4.05961914 | 0.00049305 |
| Gifsy-2 prophage protein                                                                            | 219.684201 | 0.59378598 | 0.18501579 | 3.20938005 | 0.00777216 |
| Succinyl-CoA ligase [ADP-forming] beta chain                                                        | 231.273245 | 0.59327822 | 0.16446992 | 3.60721422 | 0.00236641 |
| probable lipoprotein                                                                                | 647.274044 | 0.5931323  | 0.19924495 | 2.97690007 | 0.01430341 |
| Glycolate utilization operon transcriptional activator GlcC                                         | 396.30146  | 0.59295356 | 0.23510212 | 2.5221106  | 0.04385612 |
| FIG00639173: hypothetical protein                                                                   | 687.70674  | 0.5926552  | 0.1292724  | 4.58454534 | 6.43E-05   |
| D-serine dehydratase                                                                                | 634.910152 | 0.5921593  | 0.13478308 | 4.39342479 | 0.00014192 |
| 4-hydroxybenzoyl-CoA thioesterase family active site                                                | 122.567039 | 0.59084727 | 0.22639349 | 2.60982446 | 0.03565357 |
| Sulfur carrier protein adenylyltransferase ThiF                                                     | 22582.4473 | 0.59069261 | 0.15749666 | 3.75050876 | 0.00147901 |
| Ribosyl nicotinamide transporter%2C PnuC-like                                                       | 10027.7743 | 0.58955126 | 0.08911163 | 6.61587339 | 1.76E-09   |
| FIG00638941: hypothetical protein                                                                   | 12651.6724 | 0.58926649 | 0.17611203 | 3.34597516 | 0.00528819 |
| Putative exported protein                                                                           | 8139.43614 | 0.58709746 | 0.17733818 | 3.31060949 | 0.00587043 |
| HtrA suppressor protein                                                                             | 177.249832 | 0.58491223 | 0.16005267 | 3.65449843 | 0.00202136 |
| NAD(P)H-flavin oxidoreductase                                                                       | 227.175087 | 0.58203606 | 0.19558902 | 2.97581155 | 0.01433874 |
| Anthrilate synthase%2C aminase component                                                            | 73337.3706 | 0.58024503 | 0.21675218 | 2.67699749 | 0.03018002 |
| Antigen 43 precursor                                                                                | 9354.44527 | 0.57972251 | 0.16577927 | 3.49695415 | 0.00334737 |
| hypothetical protein                                                                                | 214.153508 | 0.57609774 | 0.18211015 | 3.16345756 | 0.0089161  |
| predicted 4-deoxy-L-threo-5-hexosulose-uronate ketol-isomerase                                      | 254.379844 | 0.57429761 | 0.19751251 | 2.90765185 | 0.01716291 |
| S-ribosylhomocysteine lyase                                                                         | 10131.6789 | 0.57261467 | 0.1664311  | 3.47791462 | 0.00350868 |
| Naphthoate synthase                                                                                 | 3365.35717 | 0.57231665 | 0.18334748 | 3.12148628 | 0.00993728 |
| Inner membrane protein YqjE                                                                         | 12752.8302 | 0.57137315 | 0.16321538 | 3.50073101 | 0.00332339 |
| ATP-dependent RNA helicase                                                                          | 2536.19429 | 0.57132519 | 0.13986287 | 4.08489533 | 0.00045132 |
| Trehalose-6-phosphate phosphatase                                                                   | 3602.18379 | 0.57126995 | 0.14282768 | 3.99971457 | 0.00061572 |
| YcgN (Fragment)                                                                                     | 721.160707 | 0.57034882 | 0.11932115 | 4.77994749 | 2.92E-05   |
| orf%2C hypothetical protein                                                                         | 708.387261 | 0.57011004 | 0.13464883 | 4.23405109 | 0.00025887 |
| Cell filamentation protein fic                                                                      | 7838.70703 | 0.56959408 | 0.1921441  | 2.96441107 | 0.01472156 |
| Ethanolamine utilization polyhedral-body-like protein EutL                                          | 541.342713 | 0.56942974 | 0.1755914  | 3.24292503 | 0.00703956 |
| Homoserine kinase                                                                                   | 5656.96738 | 0.56832863 | 0.15524276 | 3.66090258 | 0.00198043 |
| Cystine ABC transporter%2C periplasmic cystine-binding protein FltY                                 | 6685.78465 | 0.56387305 | 0.14442774 | 3.90418802 | 0.00085731 |
| Dipeptidyl carboxypeptidase Dcp                                                                     | 2760.69665 | 0.56260255 | 0.14688583 | 3.830203   | 0.00111624 |
| Chaperone protein HtpG                                                                              | 7315.13612 | 0.56241873 | 0.13282811 | 4.23418444 | 0.00025887 |
| Tripeptide aminopeptidase                                                                           | 8457.6895  | 0.56221464 | 0.151402   | 3.71338979 | 0.00167366 |
| Regulator of sigma D                                                                                | 1779.60221 | 0.56151506 | 0.14831224 | 3.78603329 | 0.00130948 |
| Prophage CP4-57 integrase                                                                           | 204.23102  | 0.5611827  | 0.22261321 | 2.52088675 | 0.04393608 |
| FIG00639422: hypothetical protein                                                                   | 1263.75773 | 0.56112109 | 0.15212565 | 3.68853707 | 0.00180677 |
| Putative uncharacterized protein Yrbl                                                               | 2256.68392 | 0.55830914 | 0.10366351 | 3.58578271 | 1.82E-06   |
| ABC-type polar amino acid transport system%2CATPase component                                       | 628.067099 | 0.55782471 | 0.12524166 | 4.45398677 | 0.00010888 |
| Protein YciE                                                                                        | 417.744068 | 0.5574773  | 0.15635979 | 3.56534952 | 0.00271421 |
| PTS system%2C mannitol-specific IIC component                                                       | 2575.23776 | 0.5568576  | 0.14445972 | 3.85476031 | 0.00103189 |
| Non-specific DNA-binding protein Dps / Iron-binding ferritin-like antioxidant protein / Ferroxidase | 37142.8478 | 0.5565227  | 0.18829234 | 2.95563108 | 0.0150665  |
| NAD(P) transhydrogenase subunit beta                                                                | 12855.7364 | 0.55648694 | 0.14325416 | 3.88461265 | 0.00092203 |
| Inner membrane transport protein YbaT                                                               | 2483.97479 | 0.55194977 | 0.19717619 | 2.79927197 | 0.02254586 |
| Cation transport regulator chaB                                                                     | 846.840225 | 0.55167145 | 0.15525093 | 3.55341794 | 0.00280352 |
| Phosphate transport system regulatory protein PhoU                                                  | 1175.25509 | 0.55008132 | 0.11189836 | 4.91590172 | 1.66E-05   |
| Osmoprotectant ABC transporter ATP-binding subunit YehX                                             | 1406.5105  | 0.5499187  | 0.19969048 | 2.75385533 | 0.02528066 |
| Trans-aconitate 2-methyltransferase                                                                 | 1186.27828 | 0.54889601 | 0.18358465 | 2.98987967 | 0.01395129 |
| type 1 fimbriae major subunit FimA                                                                  | 121.7245   | 0.54825603 | 0.17947406 | 3.05479262 | 0.01179134 |
| Fosmidomycin resistance protein                                                                     | 463.156982 | 0.54568308 | 0.15089056 | 3.61641635 | 0.00229551 |
| 2-deoxy-D-gluconate 3-dehydrogenase                                                                 | 262.690787 | 0.54498987 | 0.16477672 | 3.30744462 | 0.00590432 |
| 5-(hydroxymethyl)glutathione dehydrogenase                                                          | 1630.79966 | 0.54322416 | 0.16654355 | 3.26175446 | 0.0066937  |
| Glycolate dehydrogenase                                                                             | 245.796655 | 0.54196129 | 0.16201215 | 3.34518927 | 0.00529566 |
| PapI protein                                                                                        | 253.616733 | 0.54062303 | 0.2067189  | 2.61525694 | 0.03515244 |
| hypothetical protein                                                                                | 138.275742 | 0.53968786 | 0.18875497 | 2.85919807 | 0.01927579 |
| L-lysine 6-monoxygenase [NADPH]                                                                     | 121955.144 | 0.53555433 | 0.11717086 | 4.57071242 | 6.76E-05   |
| L%2CD-transpeptidase YcbB                                                                           | 18558.3943 | 0.5347674  | 0.13137361 | 4.07058466 | 0.00047355 |
| 3-isopropylmalate dehydratase large subunit                                                         | 2406.11822 | 0.53346057 | 0.17060761 | 3.12682757 | 0.0097943  |
| L%2CD-transpeptidase YnhG                                                                           | 12598.2585 | 0.52734978 | 0.11494918 | 4.5876775  | 6.37E-05   |
| Endonuclease/Exonuclease/phosphatase family protein                                                 | 1358.29077 | 0.52641909 | 0.19934687 | 2.64071908 | 0.03301929 |
| 2-hydroxy-3-oxopropionate reductase                                                                 | 502.952249 | 0.5263154  | 0.17130091 | 3.07246125 | 0.01123191 |
| Branched-chain amino acid aminotransferase                                                          | 7318.96531 | 0.52630976 | 0.11035257 | 4.76934752 | 3.05E-05   |
| hypothetical protein                                                                                | 168.560601 | 0.525841   | 0.18870347 | 2.78659957 | 0.02328834 |
| Putative Rz endopeptidase from lambdoid prophage DLP12                                              | 141.742949 | 0.52491989 | 0.16819464 | 3.1209074  | 0.00994472 |
| Acyl-CoA dehydrogenases                                                                             | 3841.39911 | 0.52397982 | 0.17860269 | 2.93377337 | 0.01597679 |
| Peptide methionine sulfoxide reductase MsrA                                                         | 5096.22678 | 0.52297666 | 0.10060079 | 5.1985341  | 4.65E-06   |
| Transcriptional regulator%2C AraC family                                                            | 347.513809 | 0.52283562 | 0.13672075 | 3.82411319 | 0.00113561 |
| Putative membrane protein                                                                           | 3408.12988 | 0.51792071 | 0.19509436 | 2.65471904 | 0.03193317 |
| Ribosome-associated heat shock protein implicated in the recycling of the 50S subunit (S4 paralog)  | 459.372934 | 0.51563007 | 0.12595424 | 4.09378878 | 0.00043731 |
| iron acquisition outermembrane yersiniabactin receptor (FyuA%2CPSn%2CPestacin receptor)             | 69662.3671 | 0.51416579 | 0.16220933 | 3.16976707 | 0.00873374 |
| NADH-ubiquinone oxidoreductase chain J                                                              | 2281.65771 | 0.51408834 | 0.1814566  | 2.83312007 | 0.02066965 |
| PTS system%2C maltose and glucose-specific IIC component                                            | 412.498214 | 0.51326383 | 0.17668303 | 2.90499797 | 0.0172553  |
| Outer membrane protein C precursor                                                                  | 163663.101 | 0.51233789 | 0.1247247  | 4.10775005 | 0.00041548 |
| Hypothetical zinc-type alcohol dehydrogenase-like protein YphC                                      | 301.000799 | 0.51137062 | 0.18094988 | 2.82603455 | 0.02105214 |
| Head decoration protein                                                                             | 137.288297 | 0.51130425 | 0.20225149 | 2.52806173 | 0.04322722 |
| Aquaporin Z                                                                                         | 2526.09578 | 0.50995588 | 0.10704958 | 4.764109   | 3.12E-05   |
| Glutathione-regulated potassium-efflux system protein KefC                                          | 1700.11278 | 0.50781774 | 0.16787359 | 3.02500071 | 0.01277376 |
| Alpha-ketoglutarate-dependent taurine dioxygenase                                                   | 264.189487 | 0.50680938 | 0.1800294  | 2.81514786 | 0.02162957 |
| Cytoplasmic trehalase                                                                               | 9945.75286 | 0.5047901  | 0.16215035 | 3.11309906 | 0.01016219 |
| FIG00638099: hypothetical protein                                                                   | 259.482296 | 0.5038423  | 0.1706076  | 2.95322307 | 0.01516838 |
| Transcriptional regulator%2C TetR family                                                            | 3244.82895 | 0.50335599 | 0.11009206 | 4.57213688 | 6.75E-05   |
| Flagellar biosynthesis protein FlhC                                                                 | 311257.262 | 0.50288088 | 0.14417023 | 3.48810475 | 0.00342024 |
| Beta-1%2C3-galactosyltransferase / Beta-1%2C4-galactosyltransferase                                 | 334.072406 | 0.50180484 | 0.1667077  | 3.01008787 | 0.01324557 |
| Uncharacterized protein ImpA                                                                        | 1664.11658 | 0.50032773 | 0.1430467  | 3.49765312 | 0.00334611 |
| Aspartokinase                                                                                       | 11558.0932 | 0.49794989 | 0.16529881 | 3.01242274 | 0.01320318 |
| probable membrane protein b2001                                                                     | 342.020738 | 0.49785997 | 0.17475385 | 2.84892129 | 0.019771   |
| FIG00638107: hypothetical protein                                                                   | 2979.64155 | 0.49640386 | 0.15984687 | 3.10549638 | 0.01032641 |
| Putative cytoplasmic protein %2Cprobably associated with Glutathione-regulated potassium-efflux     | 299.174013 | 0.49481508 | 0.19456114 | 2.54323694 | 0.0416365  |
| Capsular polysaccharide export system protein KpsF                                                  | 4564.32415 | 0.49461033 | 0.15321556 | 3.22819901 | 0.00735431 |
| Putative GTP-binding protein YdgA                                                                   | 21788.8197 | 0.49326705 | 0.10813924 | 4.5614067  | 6.96E-05   |
| NADH-ubiquinone oxidoreductase chain G                                                              | 12733.4583 | 0.49305318 | 0.19179846 | 2.57068375 | 0.03906552 |
| ABC transporter%2C periplasmic substrate-binding protein YnjB                                       | 868.103724 | 0.49002637 | 0.12771581 | 3.83684985 | 0.0019289  |
| FIG00638146: hypothetical protein                                                                   | 155.013998 | 0.48982311 | 0.19733178 | 2.48223122 | 0.04770039 |
| Xanthine/uracil/thiamine/ascorbate permease family protein                                          | 306.881131 | 0.48961788 | 0.15047042 | 3.25391447 | 0.00684469 |
| Thiosulfate sulfurtransferase%2C rhodanase                                                          | 3638.44582 | 0.48868937 | 0.10368029 | 4.71342609 | 3.83E-05   |
| Membrane alanine aminopeptidase N                                                                   | 23618.152  | 0.48796502 | 0.10415142 | 4.68514989 | 4.31E-05   |
| Glycosyltransferase IroB                                                                            | 246440.751 | 0.48471768 | 0.12636326 | 3.83590673 | 0.00109289 |
| Enterobactin synthetase component F%2C serine activating enzyme                                     | 130373.027 | 0.48303419 | 0.1262646  | 3.8255711  | 0.00113179 |
| Periplasmic protein YqjC                                                                            | 6552.71935 | 0.48279155 | 0.12620639 | 3.82541288 | 0.00113179 |

|                                                                                                                                                               |            |            |            |            |            |
|---------------------------------------------------------------------------------------------------------------------------------------------------------------|------------|------------|------------|------------|------------|
| S-formylglutathione hydrolase                                                                                                                                 | 338.468416 | 0.48147078 | 0.16690667 | 2.88467066 | 0.01803275 |
| Thioredoxin 2                                                                                                                                                 | 360.077826 | 0.47858561 | 0.14246753 | 3.359261   | 0.00508375 |
| NADH-ubiquinone oxidoreductase chain I                                                                                                                        | 2229.19108 | 0.4784997  | 0.16263934 | 2.94209083 | 0.01563409 |
| Inner membrane protein YhjD                                                                                                                                   | 1414.12741 | 0.47803245 | 0.1169434  | 4.08772486 | 0.00044686 |
| Protein of unknown function DUF541                                                                                                                            | 2420.95526 | 0.47713611 | 0.10404914 | 4.58568069 | 6.41E-05   |
| FIG00637886: hypothetical protein                                                                                                                             | 238.100762 | 0.47704179 | 0.18568994 | 2.56902334 | 0.0392199  |
| Selenoprotein O and cysteine-containing homologs                                                                                                              | 6337.53539 | 0.47473569 | 0.12671254 | 3.74655645 | 0.00149421 |
| Protein ydhR precursor                                                                                                                                        | 1951.32425 | 0.47426838 | 0.14974082 | 3.16726192 | 0.00878715 |
| Glutamine ABC transporter%2C periplasmic glutamine-binding protein (TC 3.A.1.3.2)                                                                             | 11223.3292 | 0.47394658 | 0.09888089 | 4.7931061  | 2.77E-05   |
| Glycine dehydrogenase [decarboxylating] (glycine cleavage system P protein)                                                                                   | 1761.2075  | 0.47293644 | 0.14339849 | 3.2980573  | 0.00605505 |
| Sensory histidine kinase QseC                                                                                                                                 | 223.159323 | 0.4718179  | 0.14034206 | 3.36191367 | 0.00507051 |
| Regulatory protein SoxS                                                                                                                                       | 414.581892 | 0.47176936 | 0.18512914 | 2.54832577 | 0.04113715 |
| Cytoplasmic protein YaiE                                                                                                                                      | 2973.66561 | 0.47161282 | 0.15044233 | 3.13484123 | 0.0096108  |
| Glutathione S-transferase%2C omega                                                                                                                            | 1296.59413 | 0.47135816 | 0.1202638  | 3.91936862 | 0.00081983 |
| Glutamate Aspartate periplasmic binding protein precursor GltI (TC 3.A.1.3.4)                                                                                 | 1076.19628 | 0.47135568 | 0.14997028 | 3.14299387 | 0.00943057 |
| 18K peptidoglycan-associated outer membrane lipoprotein%3B Peptidoglycan-associated lipoprotein precursor%3B Outer membrane protein P6%3B OmpA/MotB precursor | 17544.7665 | 0.47040944 | 0.12871806 | 3.65457231 | 0.00202136 |
| Tellurite resistance protein TehB                                                                                                                             | 1002.28318 | 0.46952026 | 0.13694146 | 3.42862027 | 0.00409313 |
| LysR family transcriptional regulator YdcI                                                                                                                    | 637.279224 | 0.46937754 | 0.18192381 | 2.58007752 | 0.03814822 |
| Acetolactate synthase large subunit                                                                                                                           | 3538.4636  | 0.46757254 | 0.14875407 | 3.14325885 | 0.00943057 |
| Glucokinase%2C ROK family                                                                                                                                     | 654.117656 | 0.46255874 | 0.17276156 | 2.67744015 | 0.03016721 |
| L-fuculokinase                                                                                                                                                | 787.178188 | 0.46203977 | 0.15011622 | 3.0778804  | 0.01108138 |
| Cell division protein BofA                                                                                                                                    | 10384.5324 | 0.46104555 | 0.15386315 | 2.99646516 | 0.01371394 |
| Molybdenum cofactor biosynthesis protein MoeD                                                                                                                 | 396.298329 | 0.46102421 | 0.16768024 | 2.74942488 | 0.02558363 |
| FIG004088: inner membrane protein YebE                                                                                                                        | 735.467402 | 0.46077435 | 0.155293   | 2.96712893 | 0.01463907 |
| Uridine phosphorylase                                                                                                                                         | 16627.7282 | 0.4607062  | 0.15134865 | 3.044006   | 0.01206915 |
| Phosphoenolpyruvate-dihydroxyacetone phosphotransferase operon regulatory protein DhaR                                                                        | 586.630625 | 0.46038235 | 0.17372565 | 2.65005398 | 0.03229127 |
| L-proline glycine betaine ABC transport system permease protein ProV (TC 3.A.1.12.1)                                                                          | 2307.82192 | 0.45968072 | 0.13327962 | 3.44899481 | 0.00384793 |
| probable ribonuclease inhibitor VPO3690                                                                                                                       | 408.587287 | 0.45791123 | 0.18064542 | 2.53486209 | 0.04246769 |
| Xylose ABC transporter%2C permease protein XylH                                                                                                               | 181.717554 | 0.45693732 | 0.17064995 | 2.67762933 | 0.03016721 |
| probable haloacid dehalogenase-like hydrolase STY3852                                                                                                         | 1111.23176 | 0.45594455 | 0.10501712 | 4.34162113 | 0.00017238 |
| Cyclic di-GMP binding protein precursor                                                                                                                       | 12291.5867 | 0.45584262 | 0.11462254 | 3.9769022  | 0.00066738 |
| Universal stress protein A                                                                                                                                    | 26023.6266 | 0.4540046  | 0.12809082 | 3.5447084  | 0.00288362 |
| Starvation lipoprotein Slp paralogs                                                                                                                           | 2174.00246 | 0.4539405  | 0.16162977 | 2.80852028 | 0.02205826 |
| Phosphate transport ATP-binding protein PstB (TC 3.A.1.7.1)                                                                                                   | 654.781198 | 0.45351911 | 0.17118376 | 2.6493116  | 0.03233369 |
| Phage tail length tape-measure protein 1                                                                                                                      | 780.521689 | 0.45345718 | 0.12968089 | 3.49671562 | 0.00334737 |
| Lysine decarboxylase 2%2C constitutive                                                                                                                        | 3746.41009 | 0.4525391  | 0.16819129 | 2.6906214  | 0.02936973 |
| Outer membrane stress sensor protease DegQ%2Cserine protease                                                                                                  | 2757.1608  | 0.45234288 | 0.0985757  | 4.58878705 | 6.36E-05   |
| Outer membrane lipoprotein Blc                                                                                                                                | 3965.65692 | 0.45012183 | 0.14298413 | 3.1480544  | 0.00931517 |
| Two-component system response regulator OmpR                                                                                                                  | 3048.85162 | 0.44985873 | 0.09709549 | 4.63315801 | 5.35E-05   |
| Low-specificity L-threonine aldolase                                                                                                                          | 4846.48671 | 0.44926259 | 0.15172151 | 2.96110011 | 0.01483311 |
| Glutamate Aspartate transport system permease protein GltJ (TC 3.A.1.3.4)                                                                                     | 288.548348 | 0.44874026 | 0.15030901 | 2.98545144 | 0.01408456 |
| 3'(2')%2C5'-bisphosphate nucleotidase                                                                                                                         | 9070.43849 | 0.44778913 | 0.14981921 | 2.98868327 | 0.01396698 |
| FIG00639383: hypothetical protein                                                                                                                             | 179.929717 | 0.44698108 | 0.17903555 | 2.49660512 | 0.04625805 |
| Cytidine deaminase                                                                                                                                            | 4469.08318 | 0.44600117 | 0.15305559 | 2.91398152 | 0.01685468 |
| Glutathione-regulated potassium-efflux system protein KefB                                                                                                    | 1437.39156 | 0.44412694 | 0.11950492 | 3.71639058 | 0.00165691 |
| VgrG protein                                                                                                                                                  | 196.046952 | 0.44395451 | 0.17353671 | 2.55827434 | 0.04021462 |
| Phenylalanyl-tRNA synthetase beta chain                                                                                                                       | 13384.9145 | 0.443913   | 0.12360326 | 3.59143434 | 0.00248395 |
| probable lipoprotein                                                                                                                                          | 4137.76408 | 0.44374111 | 0.09489502 | 4.67612667 | 4.48E-05   |
| Dienelactone hydrolase family                                                                                                                                 | 822.38914  | 0.44274861 | 0.13567862 | 3.26321571 | 0.00666817 |
| D-alanyl-D-alanine carboxypeptidase                                                                                                                           | 5564.83805 | 0.43939776 | 0.09668491 | 4.54463633 | 7.45E-05   |
| Glutamate transport membrane-spanning protein                                                                                                                 | 2368.50961 | 0.43907876 | 0.11634342 | 3.77398873 | 0.001359   |
| Universal stress protein D                                                                                                                                    | 6040.65595 | 0.43699321 | 0.10195606 | 4.28609336 | 0.00021304 |
| Oligopeptidase A                                                                                                                                              | 10779.4145 | 0.43458992 | 0.1111636  | 3.90946259 | 0.0008458  |
| Peptide transport system permease protein SapC                                                                                                                | 926.86015  | 0.4336782  | 0.13770025 | 3.14943648 | 0.00928282 |
| Ribonucleotide reductase of class Ib (aerobic)%2Cbeta subunit                                                                                                 | 8609.17305 | 0.4326745  | 0.12877019 | 3.36005171 | 0.00507651 |
| Ribonuclease E                                                                                                                                                | 13430.6596 | 0.43228378 | 0.09510128 | 4.54550965 | 7.44E-05   |
| Probable glutathione S-transferase                                                                                                                            | 617.085454 | 0.4322009  | 0.14936591 | 2.89357122 | 0.0176399  |
| Aerobactin siderophore receptor IutA @ TonB-dependent siderophore receptor                                                                                    | 665164.934 | 0.43120166 | 0.1683854  | 2.56080187 | 0.03995693 |
| L-arabinose transport system permease protein (TC 3.A.1.2.2)                                                                                                  | 359.974328 | 0.43086393 | 0.15373086 | 2.80271599 | 0.0223282  |
| Nucleoside permease NupC                                                                                                                                      | 2938.61785 | 0.4301027  | 0.09627847 | 4.46727805 | 0.00010292 |
| PsiE protein                                                                                                                                                  | 1544.81619 | 0.42996738 | 0.11722793 | 3.66778949 | 0.00193253 |
| Yersiniabactin synthetase%2C thiazolinyI reductase component Irp3                                                                                             | 35839.0353 | 0.42991023 | 0.14455587 | 2.9740074  | 0.01439217 |
| C4-type zinc finger protein%2C DksA/Trak family                                                                                                               | 7371.65299 | 0.42897702 | 0.10661075 | 4.0237687  | 0.00056575 |
| 2-amino-3-ketobutyrate coenzyme A ligase                                                                                                                      | 7183.10621 | 0.42893257 | 0.11772001 | 3.64366735 | 0.00209031 |
| L-proline glycine betaine ABC transport system permease protein ProW (TC 3.A.1.12.1)                                                                          | 1843.97681 | 0.42884492 | 0.15809109 | 2.71264444 | 0.02789295 |
| Peptidase B                                                                                                                                                   | 4552.42961 | 0.42813092 | 0.10013769 | 4.27542226 | 0.00022236 |
| Phage tail fiber protein                                                                                                                                      | 306.360958 | 0.42710636 | 0.14587582 | 2.92787636 | 0.01620303 |
| Folate-dependent protein for Fe/S cluster synthesis/repair in oxidative stress                                                                                | 3815.71373 | 0.42706289 | 0.10004543 | 4.26868971 | 0.00022684 |
| FIG00638355: hypothetical protein                                                                                                                             | 4655.16972 | 0.42589696 | 0.16089086 | 2.64711716 | 0.03251552 |
| PTS system%2C galactitol-specific IIC component                                                                                                               | 213.487821 | 0.42515039 | 0.17251417 | 2.46443746 | 0.0494197  |
| Carbonic anhydrase                                                                                                                                            | 3236.36728 | 0.42509801 | 0.17166179 | 2.47636946 | 0.04825825 |
| Alcohol dehydrogenase                                                                                                                                         | 3092.61915 | 0.42277227 | 0.16356835 | 2.5846827  | 0.03773893 |
| Dipeptide transport system permease protein DppC (TC 3.A.1.5.2)                                                                                               | 1014.67431 | 0.42197229 | 0.12508773 | 3.37341068 | 0.00488561 |
| Prophage Clp protease-like protein                                                                                                                            | 312.878011 | 0.42105212 | 0.13457559 | 3.12874062 | 0.0097577  |
| Putative membrane protein                                                                                                                                     | 11272.6171 | 0.42048718 | 0.12394317 | 3.39258057 | 0.00460298 |
| Respiratory nitrate reductase gamma chain                                                                                                                     | 233.859953 | 0.41754332 | 0.16826609 | 2.48144663 | 0.04772931 |
| Hexuronate utilization operon transcriptional repressor ExuR                                                                                                  | 4572.29855 | 0.41743689 | 0.10356422 | 4.03070565 | 0.00055172 |
| UDP-glucose:(glucosyl)lipopolysaccharide alpha-1%2C3-glucosyltransferase WaaO                                                                                 | 2769.57271 | 0.41677682 | 0.1443162  | 2.88794193 | 0.01786744 |
| Biotin synthesis protein BioC                                                                                                                                 | 2194.65148 | 0.4165623  | 0.13175445 | 3.16165651 | 0.00892433 |
| Outer membrane lipoprotein pcg precursor                                                                                                                      | 12891.5605 | 0.41612304 | 0.11552087 | 3.60214605 | 0.00240898 |
| Ethanolamine utilization protein EutA                                                                                                                         | 279.495054 | 0.416054   | 0.15524178 | 2.68003876 | 0.03004178 |
| Anthranilate synthase%2C aminase component                                                                                                                    | 50901.3109 | 0.41480055 | 0.12533127 | 3.3096333  | 0.00588276 |
| FIG137360: hypothetical protein                                                                                                                               | 1521.9782  | 0.41470397 | 0.10019774 | 4.13885555 | 0.00037325 |
| Glutaredoxin 2                                                                                                                                                | 12587.0185 | 0.4137491  | 0.16441965 | 2.51642128 | 0.04434992 |
| FIG00948312: hypothetical protein                                                                                                                             | 1774.685   | 0.41365311 | 0.13856364 | 2.98529333 | 0.01408456 |
| Endonuclease IV                                                                                                                                               | 953.783859 | 0.41224416 | 0.10247608 | 4.02283297 | 0.00056677 |
| Uncharacterized PLP-dependent aminotransferase YfdZ                                                                                                           | 3449.0628  | 0.41213974 | 0.11013119 | 3.74226186 | 0.00151442 |
| Puative phosphotriesterase                                                                                                                                    | 823.065484 | 0.40906708 | 0.14114571 | 2.89818983 | 0.0175024  |
| Dihydroxy-acid dehydratase                                                                                                                                    | 9855.09434 | 0.40846168 | 0.09886447 | 4.13153149 | 0.00038174 |
| Potassium efflux system KefA protein / Small-conductance mechanosensitive channel                                                                             | 1077.89609 | 0.40819844 | 0.13349995 | 3.05766723 | 0.01169233 |
| Aldo-keto reductase                                                                                                                                           | 260.124184 | 0.40637456 | 0.14612906 | 2.7809292  | 0.02358531 |
| N-ethylmaleimide reductase                                                                                                                                    | 1636.29542 | 0.40495325 | 0.10792269 | 3.75225294 | 0.00147147 |
| UDP-N-acetylmuramoylalanyl-D-glutamyl-2%2C6-diaminopimelate--D-alanyl-D-alanine ligase                                                                        | 10800.3694 | 0.40452152 | 0.0949396  | 4.26083042 | 0.00023378 |
| Thioredoxin reductase                                                                                                                                         | 6796.12639 | 0.40291308 | 0.11159923 | 3.610357   | 0.00234583 |
| Alkaline phosphatase                                                                                                                                          | 736.890396 | 0.40274912 | 0.11305343 | 3.56246714 | 0.00273519 |
| Dihydroneopterin triphosphate epimerase                                                                                                                       | 902.131327 | 0.40184087 | 0.11342307 | 3.54284956 | 0.00289933 |
| Glucose-1-phosphatase                                                                                                                                         | 4436.28898 | 0.40175039 | 0.13822653 | 2.9064637  | 0.01721033 |
| ABC transporter%2C periplasmic spermidine putrescine-binding protein PotD (TC 3.A.1.11.1)                                                                     | 2702.71523 | 0.39981986 | 0.10664896 | 3.74893368 | 0.00148284 |
| Phage major capsid protein                                                                                                                                    | 648.21835  | 0.39941175 | 0.15162372 | 2.63422994 | 0.03356846 |
| Head-tail preconnector protein GP5                                                                                                                            | 786.0946   | 0.39928028 | 0.1167954  | 3.41863025 | 0.00423379 |
| 6-phospho-beta-glucosidase                                                                                                                                    | 5235.91818 | 0.39753043 | 0.08589689 | 4.62799549 | 5.45E-05   |
| FIG00638703: hypothetical protein                                                                                                                             | 1828.02557 | 0.39721129 | 0.08693328 | 4.569151   | 6.79E-05   |
| Inner membrane protein YphA                                                                                                                                   | 3594.56151 | 0.3958387  | 0.14824192 | 2.67022108 | 0.03074089 |
| Predicted exported alpha-N-acetylgalactosaminidase                                                                                                            | 2691.27425 | 0.39531982 | 0.12458656 | 3.17305359 | 0.00864639 |
| Putative exported protein                                                                                                                                     | 3584.81863 | 0.393911   | 0.11278275 | 3.49265287 | 0.00338809 |
| hypothetical tRNA/rRNA methyltransferase yJiF                                                                                                                 | 2383.61581 | 0.39230849 | 0.1115737  | 3.51613759 | 0.00316457 |
| L-aspartate oxidase                                                                                                                                           | 7405.48237 | 0.39190232 | 0.13333331 | 2.93926778 | 0.01573454 |
| putative transport                                                                                                                                            | 773.502472 | 0.39131462 | 0.13127742 | 2.98082195 | 0.01418917 |
| FIG00637900: hypothetical protein                                                                                                                             | 1313.64197 | 0.39130772 | 0.10143619 | 3.85767346 | 0.0010237  |

|                                                                                                                                                 |            |            |            |            |            |
|-------------------------------------------------------------------------------------------------------------------------------------------------|------------|------------|------------|------------|------------|
| Biotin synthase                                                                                                                                 | 2133.73021 | 0.38858956 | 0.11932925 | 3.25644849 | 0.00680193 |
| Ferrichrome-iron receptor                                                                                                                       | 3111.27662 | 0.38780617 | 0.09913365 | 3.91195305 | 0.00084028 |
| UDP-glucose:(glucosyl)lipopolysaccharide alpha-1%2C2-glucosyltransferase                                                                        | 2749.06834 | 0.38477126 | 0.13339712 | 2.88440462 | 0.01803275 |
| Succinyl-CoA synthetase%2C alpha subunit-related enzymes                                                                                        | 5298.82325 | 0.38375607 | 0.13711188 | 2.79885363 | 0.02255319 |
| Leucine-responsive regulatory protein%2C regulator for leucine (or lrp) regulon and high-affinity branched-chain amino acid transport system    | 7235.38262 | 0.38285025 | 0.15261578 | 2.5085889  | 0.04508502 |
| Cytosine deaminase                                                                                                                              | 322.012506 | 0.38206705 | 0.14058403 | 2.71771293 | 0.02754545 |
| NAD(P)HX epimerase / NAD(P)HX dehydratase                                                                                                       | 3585.65554 | 0.37623199 | 0.13332349 | 2.8219483  | 0.02128032 |
| Copper-sensing two-component system response regulator CpxR                                                                                     | 4985.9851  | 0.37555163 | 0.11480108 | 3.27132484 | 0.00651465 |
| COG0699: Predicted GTPases (dynammin-related)                                                                                                   | 679.071126 | 0.37271223 | 0.14917144 | 2.49854943 | 0.04611764 |
| Dipeptide-binding ABC transporter%2C periplasmic substrate-binding component (TC 3.A.1.5.2)%3B Putative hemin-binding lipoprotein               | 3670.86038 | 0.37026986 | 0.10408501 | 3.55737942 | 0.00277502 |
| Ribonucleotide reductase of class Ib (aerobic)%2C alpha subunit                                                                                 | 15397.4363 | 0.36943584 | 0.13745411 | 2.68770317 | 0.02950264 |
| Multidrug transporter MdtC                                                                                                                      | 880.082375 | 0.368964   | 0.13829472 | 2.66795441 | 0.03087782 |
| Transcriptional regulator%2C GntR family                                                                                                        | 906.82304  | 0.36828146 | 0.12975154 | 2.83835915 | 0.02035637 |
| Oxidoreductase (putative)                                                                                                                       | 595.396297 | 0.36805313 | 0.14148807 | 2.60130143 | 0.03629968 |
| UDP-sugar hydrolase                                                                                                                             | 3991.03917 | 0.36580567 | 0.12246384 | 2.98705037 | 0.01403464 |
| TonB-dependent hemin %2C ferrichrome receptor                                                                                                   | 121631.308 | 0.36553449 | 0.11120473 | 3.28704096 | 0.00624558 |
| Universal stress protein F                                                                                                                      | 2490.19556 | 0.36492493 | 0.14621878 | 2.49574595 | 0.04633254 |
| NADPH-dependent broad range aldehyde dehydrogenase YqhD                                                                                         | 1419.77451 | 0.36420265 | 0.11797633 | 3.08708238 | 0.01079464 |
| Cell division inhibitor                                                                                                                         | 2148.20243 | 0.3636589  | 0.11709754 | 3.10560665 | 0.01032641 |
| Protein ImpG/VasA                                                                                                                               | 1241.88724 | 0.36249076 | 0.11720062 | 3.09290826 | 0.0106603  |
| FIG00639264: hypothetical protein                                                                                                               | 2005.25057 | 0.36195491 | 0.0943573  | 3.83600336 | 0.0019289  |
| Endoglucanase precursor                                                                                                                         | 5034.57107 | 0.36103035 | 0.08363046 | 4.31697185 | 0.00018874 |
| Proline/sodium symporter PutP (TC 2.A.21.2.1) @ Propionate/sodium symporter                                                                     | 1914.07318 | 0.3598731  | 0.11820008 | 3.04460952 | 0.01205871 |
| 33 kDa chaperonin (Heat shock protein 33) (HSP33)                                                                                               | 1544.42034 | 0.35741661 | 0.10889286 | 3.28227783 | 0.00630913 |
| Aerobic respiration control protein arcA                                                                                                        | 10836.2333 | 0.35623853 | 0.12475574 | 2.85548808 | 0.01946347 |
| Exodeoxyribonuclease V alpha chain                                                                                                              | 2842.43835 | 0.35320853 | 0.11108885 | 3.1795137  | 0.0084774  |
| Integration host factor beta subunit                                                                                                            | 4694.0861  | 0.35299561 | 0.13518992 | 2.61110893 | 0.03555079 |
| Biosynthetic Aromatic amino acid aminotransferase alpha                                                                                         | 2781.73315 | 0.35206131 | 0.11869542 | 2.96609014 | 0.01467284 |
| Putative minor tail protein                                                                                                                     | 327.139611 | 0.35114234 | 0.14087404 | 2.49259792 | 0.04659378 |
| Lipopolysaccharide core biosynthesis protein WaaP                                                                                               | 2275.31164 | 0.35042292 | 0.12122858 | 2.89059664 | 0.01776499 |
| Phosphoenolpyruvate:dihydroxyacetone phosphotransferase                                                                                         | 1567.74285 | 0.34994495 | 0.11312266 | 3.09350006 | 0.0106603  |
| Glucose-1-phosphate adenyllyltransferase                                                                                                        | 25115.2158 | 0.3479794  | 0.13049773 | 2.66655511 | 0.03093982 |
| COG2005: N-terminal domain of molybdenum-binding protein                                                                                        | 3908.44762 | 0.3477448  | 0.13613091 | 2.55448815 | 0.04058619 |
| Type I secretion outer membrane protein%2C TolC precursor                                                                                       | 11306.2219 | 0.34756723 | 0.10153302 | 3.423194   | 0.00416952 |
| NAD(P) transhydrogenase alpha subunit                                                                                                           | 9983.75347 | 0.34754371 | 0.10811033 | 3.21471315 | 0.00763905 |
| CFA/I fimbrial major subunit                                                                                                                    | 2407.7359  | 0.34645523 | 0.13597794 | 2.54787828 | 0.04115546 |
| Mannitol-1-phosphate 5-dehydrogenase                                                                                                            | 2552.45772 | 0.34146442 | 0.12396417 | 2.75454118 | 0.0252591  |
| Zinc transporter ZupT                                                                                                                           | 2740.84224 | 0.33930692 | 0.10313454 | 3.28994453 | 0.00619835 |
| NAD-dependent malic enzyme                                                                                                                      | 13031.7786 | 0.33810208 | 0.08515919 | 3.97023599 | 0.00068106 |
| Uncharacterized protein YhjG                                                                                                                    | 3117.75351 | 0.33808595 | 0.11640396 | 2.90441975 | 0.01726931 |
| Threonine dehydratase biosynthetic                                                                                                              | 6341.42057 | 0.33799374 | 0.10957404 | 3.08461511 | 0.01085899 |
| Sensory histidine kinase BaeS                                                                                                                   | 707.163136 | 0.33628665 | 0.12140923 | 2.76986067 | 0.0243086  |
| Cation transport protein chaC                                                                                                                   | 4194.57001 | 0.33564548 | 0.10694029 | 3.13862513 | 0.00953671 |
| Putative inner membrane protein                                                                                                                 | 363.400653 | 0.33561198 | 0.13617661 | 2.46453466 | 0.0494197  |
| Ferredoxin--NADP(+) reductase                                                                                                                   | 2537.41444 | 0.33302898 | 0.10436049 | 3.19114052 | 0.00818502 |
| Peptide transport system ATP-binding protein SapF                                                                                               | 1106.25809 | 0.33267857 | 0.11166415 | 2.97927823 | 0.01423914 |
| Aldo-keto reductase                                                                                                                             | 2872.89569 | 0.33190288 | 0.12727619 | 2.60773744 | 0.03577849 |
| Universal stress protein G                                                                                                                      | 18960.6928 | 0.33175761 | 0.09336322 | 3.55340778 | 0.00280352 |
| Glycerol kinase                                                                                                                                 | 1468.29804 | 0.33040174 | 0.0972417  | 3.39773728 | 0.00453705 |
| Phosphoribosyl-AMP cyclohydrolase                                                                                                               | 3322.8656  | 0.3303115  | 0.1104111  | 2.99165129 | 0.01390124 |
| Alpha-2-macroglobulin                                                                                                                           | 16164.3005 | 0.32985934 | 0.08907713 | 3.70307532 | 0.00172148 |
| Allophanate hydrolase 2 subunit 1                                                                                                               | 4079.49244 | 0.32895991 | 0.09381375 | 3.50652107 | 0.00325706 |
| Putative oxidoreductase                                                                                                                         | 4170.36608 | 0.32832661 | 0.13244065 | 2.47904712 | 0.04797442 |
| putative capsid protein of prophage                                                                                                             | 771.565706 | 0.32717073 | 0.10646022 | 3.07317365 | 0.01121822 |
| Cell division inhibitor                                                                                                                         | 1986.58028 | 0.32587843 | 0.09430967 | 3.45540833 | 0.00378035 |
| Putative deoxyribonuclease YjiV                                                                                                                 | 984.326996 | 0.32146025 | 0.10438154 | 3.07966555 | 0.01102811 |
| Zinc transporter ZitB                                                                                                                           | 952.625088 | 0.32055822 | 0.11727415 | 2.73340908 | 0.02648668 |
| Protein export cytoplasm chaperone protein (SecB%2Cmaintains protein to be exported in unfolded state)                                          | 364.792    | 0.31734556 | 0.07784051 | 4.07686899 | 0.00046196 |
| Trilactone hydrolase IroD                                                                                                                       | 29549.542  | 0.31716285 | 0.10013712 | 3.16728564 | 0.00878715 |
| Putative ABC transporter ATP-binding protein                                                                                                    | 1598.17271 | 0.31517834 | 0.11722781 | 2.68859692 | 0.02946959 |
| Sodium/glutamate symport protein                                                                                                                | 2345.70563 | 0.31329563 | 0.11020234 | 2.84291279 | 0.02008769 |
| FIG00905232: hypothetical protein                                                                                                               | 900.43022  | 0.31266784 | 0.10536059 | 2.96759766 | 0.01463248 |
| Kup system potassium uptake protein                                                                                                             | 961.484909 | 0.31254692 | 0.10725831 | 2.9139647  | 0.01685468 |
| DI-1/YajL/PfpI superfamily%2C includes chaperone protein YajL (former ThiJ)%2C parkinsonism-associated protein DI-1%2C peptidases PfpI%2C Hsp31 | 2438.93029 | 0.31149794 | 0.10710281 | 2.90840126 | 0.01713965 |
| Carbon starvation protein A                                                                                                                     | 7856.40953 | 0.3094549  | 0.11781351 | 2.62665035 | 0.03415153 |
| Outer membrane protein H precursor                                                                                                              | 10553.0962 | 0.30734058 | 0.08910318 | 3.44926614 | 0.00384793 |
| Pyruvate formate-lyase                                                                                                                          | 683.739988 | 0.30723985 | 0.12267077 | 2.50458893 | 0.04556067 |
| Anthraniolate phosphoribosyltransferase like                                                                                                    | 6667.04225 | 0.3036475  | 0.08713299 | 3.48487425 | 0.00344506 |
| Phosphate starvation-inducible ATPase PhoH with RNA binding motif                                                                               | 8740.90495 | 0.30000817 | 0.09982325 | 3.00539384 | 0.01337692 |
| Uncharacterized ABC transporter%2C auxiliary component YrC                                                                                      | 3379.93046 | 0.29446597 | 0.10026536 | 2.9368664  | 0.01584019 |
| FIG00639949: hypothetical protein                                                                                                               | 1599.03357 | 0.29362095 | 0.11892419 | 2.46897578 | 0.04895289 |
| Metal-dependent hydrolase YbeY%2C involved in rRNA and/or ribosome maturation and assembly                                                      | 4451.46932 | 0.29225368 | 0.10688769 | 2.73421271 | 0.02646603 |
| Phage tail fiber protein                                                                                                                        | 992.66438  | 0.29127641 | 0.11215913 | 2.59699254 | 0.0366319  |
| Allophanate hydrolase 2 subunit 2                                                                                                               | 6627.57208 | 0.28830577 | 0.08662246 | 3.32830266 | 0.00555634 |
| ADP-heptose synthase                                                                                                                            | 4859.45148 | 0.28772567 | 0.09679243 | 2.97260502 | 0.01441139 |
| Glutamate synthase [NADPH] large chain                                                                                                          | 24998.6417 | 0.28757755 | 0.10779795 | 2.66774615 | 0.03087782 |
| Citrate:6-N-acetyl-6-N-hydroxy-L-lysine ligase%2C alpha subunit                                                                                 | 72421.5159 | 0.28664685 | 0.10465681 | 2.7389222  | 0.02614407 |
| Protein ydcF                                                                                                                                    | 765.871304 | 0.2852409  | 0.09913885 | 2.8771858  | 0.01839453 |
| N6-hydroxylysine O-acetyltransferase                                                                                                            | 43587.9085 | 0.28430422 | 0.10266663 | 2.76919803 | 0.02433483 |
| Acetylornithine deacetylase                                                                                                                     | 2533.1881  | 0.28312461 | 0.09032283 | 3.13458535 | 0.0096108  |
| FIG00732392: hypothetical protein                                                                                                               | 1492.05078 | 0.2825882  | 0.09884845 | 2.85880253 | 0.01928054 |
| Uncharacterized protein conserved in bacteria                                                                                                   | 1292.21976 | 0.27802089 | 0.11057486 | 2.51432284 | 0.04450032 |
| PTS IIA-like nitrogen-regulatory protein PtsN                                                                                                   | 2511.7562  | 0.27743452 | 0.09326874 | 2.97457141 | 0.01438127 |
| Decarboxylase family protein                                                                                                                    | 15099.976  | 0.27565263 | 0.10451827 | 2.63736318 | 0.03328917 |
| Cob(I)alamin adenosyltransferase                                                                                                                | 1085.38936 | 0.27511589 | 0.11040345 | 2.49191386 | 0.04664581 |
| Cys regulon transcriptional activator CysB                                                                                                      | 2530.00864 | 0.27471799 | 0.10177934 | 2.69915293 | 0.02883683 |
| Deoxyguanosinetriphosphate triphosphohydrolase                                                                                                  | 1442.61976 | 0.27336662 | 0.08954871 | 3.05271423 | 0.01184595 |
| Tail fiber assembly protein                                                                                                                     | 963.584289 | 0.27308884 | 0.10663569 | 2.56095152 | 0.03995693 |
| Virulence factor MviM                                                                                                                           | 3475.76851 | 0.27028623 | 0.10395652 | 2.59999293 | 0.036407   |
| FIG00639467: hypothetical protein                                                                                                               | 3653.81843 | 0.26529695 | 0.10386727 | 2.55419195 | 0.04058657 |
| Putative oxidoreductase                                                                                                                         | 1432.78258 | 0.2619519  | 0.0963745  | 2.71806238 | 0.02754183 |
| Phosphodiesterase yJcE                                                                                                                          | 1199.33021 | 0.2599605  | 0.10043569 | 2.58832783 | 0.03743778 |
| Uncharacterized protein yhaV                                                                                                                    | 1875.02658 | 0.25676618 | 0.10357356 | 2.47907086 | 0.04797442 |
| D-cysteine desulfhydrase                                                                                                                        | 4139.45158 | 0.25301974 | 0.10257203 | 2.46675185 | 0.04917958 |
| Hemin transport protein HmuS                                                                                                                    | 50669.0538 | 0.24337105 | 0.09057358 | 2.68699828 | 0.02950264 |
| Universal stress protein E                                                                                                                      | 17839.5434 | 0.23786677 | 0.09413102 | 2.5269754  | 0.04332514 |
| Lipoprotein YcfM%2C part of a salvage pathway of unknown substrate                                                                              | 3274.75402 | 0.23022664 | 0.07217226 | 3.18996019 | 0.00820806 |
| ATP-dependent Clp protease proteolytic subunit                                                                                                  | 9227.02333 | 0.22221429 | 0.07328421 | 3.03222609 | 0.01250752 |
| Protein of unknown function YceH                                                                                                                | 3515.21561 | 0.20567957 | 0.08355639 | 2.46156611 | 0.04963642 |
| Peptide deformylase                                                                                                                             | 3566.81895 | 0.2111542  | 0.08182493 | 2.5805612  | 0.0381273  |
| Arabinose 5-phosphate isomerase                                                                                                                 | 2427.98721 | 0.2276115  | 0.08920756 | 2.5514823  | 0.04080059 |
| GTP-binding protein EngA                                                                                                                        | 3024.16832 | 0.2416301  | 0.09757351 | 2.4763903  | 0.04825825 |
| Replicative DNA helicase                                                                                                                        | 2044.61918 | 0.2421289  | 0.09672377 | 2.5033029  | 0.04568912 |
| Protein-L-isospartate O-methyltransferase                                                                                                       | 1318.07511 | 0.242288   | 0.09727394 | 2.496866   | 0.04625805 |
| UDP-3-O-[3-hydroxymyristoyl] glucosamine N-acyltransferase                                                                                      | 12864.3395 | 0.2430837  | 0.09871284 | 2.4625334  | 0.04960408 |
| Phosphatidate cytidylyltransferase                                                                                                              | 1962.73065 | 0.2469068  | 0.09340516 | 2.6433963  | 0.03281709 |
| Per-activated serine protease autotransporter enterotoxin EspC                                                                                  | 3169.43608 | 0.2480679  | 0.07069484 | 3.5089961  | 0.00323201 |
| Translation elongation factor LepA                                                                                                              | 3942.01437 | 0.248187   | 0.09940811 | 2.4966477  | 0.04625805 |
| 3-polyprenyl-4-hydroxybenzoate carboxy-lyase                                                                                                    | 4379.80761 | 0.2502879  | 0.10084327 | 2.4819494  | 0.04770039 |

|                                                                                                                                 |            |            |            |            |            |
|---------------------------------------------------------------------------------------------------------------------------------|------------|------------|------------|------------|------------|
| Lipoprotein releasing system transmembrane protein LolE                                                                         | 2192.38781 | -0.257445  | 0.08586433 | -2.9982769 | 0.01364778 |
| Diaminohydroxyphosphoribosylaminopyrimidine deaminase                                                                           | 3562.97959 | -0.2580045 | 0.09622391 | -2.6812934 | 0.02995634 |
| Nucleoid-associated protein NdpA                                                                                                | 714.135391 | -0.264039  | 0.10623985 | -2.4853102 | 0.04736679 |
| Arginine ABC transporter%2C permease protein ArtQ                                                                               | 2497.49701 | -0.2651823 | 0.09659758 | -2.7452269 | 0.02572801 |
| 3-oxoacyl-[acyl-carrier-protein] synthase%2C KasII                                                                              | 15282.951  | -0.2682497 | 0.096377   | -2.7833374 | 0.02345596 |
| Lipopolysaccharide ABC transporter%2C ATP-binding protein LptB                                                                  | 3082.22687 | -0.2686429 | 0.098337   | -2.7318601 | 0.02656202 |
| TrkA%2C Potassium channel-family protein                                                                                        | 2280.23628 | -0.2779617 | 0.10948081 | -2.5389075 | 0.04208492 |
| Putative capsular polysaccharide transport protein YegH                                                                         | 2525.49731 | -0.2789117 | 0.09245528 | -3.0167204 | 0.01304676 |
| ABC transporter multidrug efflux pump%2C fused ATP-binding domains                                                              | 17611.7659 | -0.2792161 | 0.10347583 | -2.6983699 | 0.02885196 |
| Cobalt-zinc-cadmium resistance protein                                                                                          | 1776.93698 | -0.2799805 | 0.10550166 | -2.6538014 | 0.03199149 |
| Erythritol transcriptional regulator EryD                                                                                       | 2067.57423 | -0.2802643 | 0.11149135 | -2.5137763 | 0.04450032 |
| 1-deoxy-D-xylulose 5-phosphate reductoisomerase                                                                                 | 1812.74813 | -0.2806275 | 0.11390826 | -2.4636277 | 0.04949217 |
| Single-stranded-DNA-specific exonuclease RecJ                                                                                   | 2834.02488 | -0.2810256 | 0.09415222 | -2.9848006 | 0.01409181 |
| Ferric enterobactin transport ATP-binding protein FepC (TC 3.A.1.14.2)                                                          | 1915.33755 | -0.2821456 | 0.10000401 | -2.821343  | 0.02129958 |
| Histidyl-tRNA synthetase                                                                                                        | 5334.70146 | -0.2835926 | 0.09037905 | -3.1378139 | 0.0095513  |
| Methionyl-tRNA formyltransferase                                                                                                | 3972.07394 | -0.2843364 | 0.08539891 | -3.3295085 | 0.00554789 |
| Octaprenyl diphosphate synthase                                                                                                 | 2348.6002  | -0.2870371 | 0.09358401 | -3.0671596 | 0.01139318 |
| ATP-dependent helicase HrpB                                                                                                     | 2086.75936 | -0.2871325 | 0.09804765 | -2.9284995 | 0.01618754 |
| Tail-specific protease precursor                                                                                                | 8358.14633 | -0.2902913 | 0.10144596 | -2.8615362 | 0.01917256 |
| Siroheme synthase / Precorrin-2 oxidase                                                                                         | 975.472677 | -0.2917903 | 0.10704008 | -2.7259909 | 0.02701386 |
| Macrolide export ATP-binding/permease protein MacB                                                                              | 1925.70797 | -0.2935998 | 0.09965183 | -2.9462555 | 0.01549783 |
| Dihydrofolate synthase                                                                                                          | 983.611077 | -0.2936667 | 0.09905847 | -2.9645791 | 0.01472156 |
| CysteinyI-tRNA synthetase                                                                                                       | 1715.77138 | -0.294965  | 0.0981369  | -3.0056486 | 0.01337692 |
| mobilization protein                                                                                                            | 4242.62165 | -0.2953154 | 0.08404466 | -3.5137907 | 0.00318433 |
| N-acetylglucosamine-1-phosphate uridylyltransferase                                                                             | 3549.80828 | -0.295592  | 0.09093808 | -3.2504749 | 0.00689147 |
| Dephospho-CoA kinase                                                                                                            | 941.119644 | -0.2970105 | 0.10620849 | -2.7964855 | 0.02263168 |
| N-acetylmuramoyl-L-alanine amidase                                                                                              | 1190.0491  | -0.2978283 | 0.11120811 | -2.6781165 | 0.03016721 |
| CTP synthase                                                                                                                    | 17574.5916 | -0.2981852 | 0.10589449 | -2.8158704 | 0.02160213 |
| Two-component sensor protein RcsC                                                                                               | 1723.52738 | -0.3014    | 0.09230918 | -3.2651138 | 0.00663296 |
| Cell division protein FtsA                                                                                                      | 6860.22694 | -0.3053249 | 0.1134169  | -2.692058  | 0.02929673 |
| Enoyl-[acyl-carrier-protein] reductase [NADH]                                                                                   | 4344.69328 | -0.3082947 | 0.10895872 | -2.8294632 | 0.02084842 |
| 1-deoxy-D-xylulose 5-phosphate synthase                                                                                         | 1570.01366 | -0.3099144 | 0.0899958  | -3.1305813 | 0.00972707 |
| 23S rRNA (guanosine-2'-O')-methyltransferase rImB                                                                               | 3013.06721 | -0.3116581 | 0.11201139 | -2.7823783 | 0.0235028  |
| Inorganic pyrophosphatase                                                                                                       | 2973.35257 | -0.3124914 | 0.12046561 | -2.5940299 | 0.03691736 |
| Thiamine-monophosphate kinase                                                                                                   | 1153.54481 | -0.3134073 | 0.10741504 | -2.9177224 | 0.01668768 |
| FIGO01881: hydrolase of alkaline phosphatase superfamily                                                                        | 1844.82455 | -0.3148389 | 0.09736724 | -3.2335204 | 0.00723751 |
| ATP synthase B chain                                                                                                            | 5984.05388 | -0.3153332 | 0.09879611 | -3.1917574 | 0.00817797 |
| UDP-glucose dehydrogenase                                                                                                       | 2006.83238 | -0.3160118 | 0.11456515 | -2.758359  | 0.02503714 |
| Methyl-directed repair DNA adenine methylase                                                                                    | 1159.29132 | -0.3164483 | 0.10801189 | -2.9297541 | 0.0161562  |
| Succinate dehydrogenase flavoprotein subunit                                                                                    | 493.962692 | -0.3165248 | 0.12549756 | -2.5221593 | 0.04385612 |
| tRNA pseudouridine synthase A                                                                                                   | 1887.35024 | -0.3182781 | 0.10985941 | -2.89714   | 0.01751201 |
| GMP synthase [glutamine-hydrolyzing]%2Camidotransferase subunit                                                                 | 4251.53701 | -0.3185239 | 0.10125276 | -3.1458295 | 0.0093746  |
| Guanylate kinase                                                                                                                | 3532.48379 | -0.3187425 | 0.10686058 | -2.9827885 | 0.01413833 |
| Negative regulator of allantoin and glyoxylate utilization operons                                                              | 5414.91526 | -0.3195016 | 0.10635268 | -3.0041704 | 0.01341591 |
| Transcriptional regulator%2C GntR family domain / Aspartate aminotransferase                                                    | 1069.25631 | -0.3196477 | 0.10176708 | -3.1409738 | 0.00948406 |
| Lysophospholipase L2                                                                                                            | 1558.98966 | -0.3207828 | 0.11800492 | -2.7183848 | 0.02754048 |
| LSU ribosomal protein L36p                                                                                                      | 2508.84459 | -0.3230265 | 0.12275265 | -2.6315236 | 0.03380732 |
| Sensor kinase CiteA%2C DpiB                                                                                                     | 716.647677 | -0.3240607 | 0.10431153 | -3.1066623 | 0.01032358 |
| TsaD/KaeI/Qri7 protein%2C required for theonycarbamoyladenine t6(A)37 formation in tRNA                                         | 995.519641 | -0.324418  | 0.12116605 | -2.6774661 | 0.03016721 |
| DNA polymerase III beta subunit                                                                                                 | 2093.65743 | -0.325939  | 0.09705694 | -3.3582247 | 0.00509554 |
| putative alpha helix protein                                                                                                    | 700.533476 | -0.3260937 | 0.13196105 | -2.4711359 | 0.04873584 |
| Uncharacterized acetyltransferase YjgM                                                                                          | 464.036068 | -0.3275551 | 0.13307418 | -2.4614475 | 0.04963642 |
| GTP pyrophosphokinase                                                                                                           | 6226.87523 | -0.3297944 | 0.0925191  | -3.5646091 | 0.00271741 |
| tRNA (5-methoxyuridine) 34 synthase                                                                                             | 1784.42246 | -0.330685  | 0.12987973 | -2.5460865 | 0.0413327  |
| LPS-assembly lipoprotein RlpB precursor (Rare lipoprotein B)                                                                    | 3613.32102 | -0.3317455 | 0.10845564 | -3.0588126 | 0.0116612  |
| FIGO21862: membrane protein%2C exporter                                                                                         | 1349.93672 | -0.3317532 | 0.11057342 | -3.0002979 | 0.0135726  |
| regulator of length of O-antigen component of lipopolysaccharide chains                                                         | 1974.88607 | -0.331989  | 0.09952729 | -3.3356582 | 0.00545733 |
| Heat shock (predicted periplasmic) protein YciM%2Cprecursor                                                                     | 2453.73308 | -0.3332624 | 0.12055882 | -2.7643135 | 0.02469697 |
| Radical SAM family protein HutW%2C similar to coproporphyrinogen III oxidase%2Coxygen-independent%2Cassociated with heme uptake | 8274.20449 | -0.3343851 | 0.12416641 | -2.6930396 | 0.02923722 |
| UDP-N-acetylglucosamine 1-carboxyvinyltransferase                                                                               | 1607.16978 | -0.3347149 | 0.10842187 | -3.0871534 | 0.01079464 |
| (3R)-hydroxymyristoyl-[acyl carrier protein] dehydratase                                                                        | 3441.52865 | -0.3356062 | 0.11891495 | -2.8222372 | 0.02128032 |
| DNA-directed RNA polymerase alpha subunit                                                                                       | 37339.433  | -0.3358465 | 0.10878654 | -3.087206  | 0.01079464 |
| Arginine ABC transporter%2C permease protein ArtM                                                                               | 1287.17123 | -0.3365325 | 0.09775022 | -3.4427794 | 0.00391972 |
| S-adenosylmethionine decarboxylase proenzym                                                                                     | 1687.38694 | -0.3384595 | 0.11348633 | -2.9823812 | 0.01414171 |
| Putative DNA processing chain A                                                                                                 | 850.495311 | -0.3407231 | 0.12771917 | -2.6677524 | 0.03087782 |
| Undecaprenyl-phosphate N-acetylglucosaminyl 1-phosphate transferase                                                             | 1516.98029 | -0.3407243 | 0.1191146  | -2.8604743 | 0.01921761 |
| UDP-N-acetylmuramate:L-alanyl-gamma-D-glutamyl-meso-diaminopimelate ligase                                                      | 1961.35616 | -0.34166   | 0.12599527 | -2.7116891 | 0.02792199 |
| Proline-specific permease proY                                                                                                  | 1097.36704 | -0.34263   | 0.10721414 | -3.195754  | 0.00808617 |
| Putative ATPase component of ABC transporter with duplicated ATPase domain                                                      | 2054.96573 | -0.3426927 | 0.11357783 | -3.01725   | 0.01303867 |
| Transport ATP-binding protein CydC                                                                                              | 2549.14784 | -0.3427741 | 0.11087338 | -3.0915817 | 0.01068611 |
| FIGO638108: hypothetical protein                                                                                                | 1220.14244 | -0.343541  | 0.13188475 | -2.6048577 | 0.03601823 |
| Biotin carboxyl carrier protein of acetyl-CoA carboxylase                                                                       | 2298.80722 | -0.343594  | 0.10623835 | -3.2341807 | 0.00723023 |
| DedA protein                                                                                                                    | 657.649401 | -0.3440668 | 0.11093046 | -3.1016443 | 0.01041246 |
| DNA recombination and repair protein RecO                                                                                       | 1610.16568 | -0.3449583 | 0.11091707 | -3.1100561 | 0.01023031 |
| Phosphatase YidA                                                                                                                | 2895.52267 | -0.3455264 | 0.11539306 | -2.9943432 | 0.01379441 |
| Periplasmic esterase IroE                                                                                                       | 4491.76123 | -0.3459116 | 0.13367753 | -2.5876574 | 0.03747863 |
| FIG143263: Glycosyl transferase / Lysophospholipid acyltransferase                                                              | 2119.98047 | -0.3461335 | 0.11769586 | -2.940915  | 0.01566764 |
| DNA polymerase III subunits gamma and tau                                                                                       | 1875.44398 | -0.3464444 | 0.09914935 | -3.4941671 | 0.0033742  |
| Transcriptional regulator%2C TetR family                                                                                        | 685.441197 | -0.3478279 | 0.13505947 | -2.5753682 | 0.03860586 |
| Transcription repressor                                                                                                         | 477.120408 | -0.3497357 | 0.13973272 | -2.5028907 | 0.04570494 |
| Crotonobetaine carnitine-CoA ligase                                                                                             | 550.951222 | -0.3505397 | 0.13156697 | -2.6643439 | 0.03111625 |
| RNA:NAD 2'-phosphotransferase                                                                                                   | 440.136398 | -0.3515168 | 0.12147115 | -2.8938297 | 0.0176399  |
| Transcriptional regulator%2C LacI family                                                                                        | 1841.09868 | -0.3527982 | 0.12190559 | -2.8940285 | 0.0176399  |
| Purine nucleotide synthesis repressor                                                                                           | 843.07134  | -0.3533557 | 0.13845406 | -2.5521514 | 0.04075651 |
| ATP-dependent DNA helicase RecQ                                                                                                 | 738.45156  | -0.3540788 | 0.12655776 | -2.7977646 | 0.02260744 |
| Hemolysins and related proteins containing CBS domains                                                                          | 931.87352  | -0.3543157 | 0.12078057 | -2.933549  | 0.01597679 |
| Ribokinase                                                                                                                      | 827.496151 | -0.3546802 | 0.13830533 | -2.5644723 | 0.03967031 |
| Mir7403 protein                                                                                                                 | 3121.13906 | -0.3572431 | 0.12076143 | -2.9582552 | 0.01495475 |
| Putative ATP-binding component of a transport system                                                                            | 757.873836 | -0.3576655 | 0.13303138 | -2.6885804 | 0.02946959 |
| Lysine-specific permease                                                                                                        | 1830.19816 | -0.3578647 | 0.11471623 | -3.1195651 | 0.00997801 |
| Glutamate synthase [NADPH] small chain                                                                                          | 240.127758 | -0.3589645 | 0.14516324 | -2.4728334 | 0.04854742 |
| 4-hydroxythreonine-4-phosphate dehydrogenase                                                                                    | 2825.78284 | -0.3602042 | 0.10606843 | -3.3959606 | 0.00455988 |
| Mn-dependent transcriptional regulator MntR                                                                                     | 434.927621 | -0.3607868 | 0.14351333 | -2.5139601 | 0.04450032 |
| Putative permease                                                                                                               | 885.585894 | -0.3613553 | 0.13001299 | -2.7793782 | 0.02365284 |
| Ribosome recycling factor                                                                                                       | 6223.04501 | -0.3628595 | 0.13807481 | -2.627992  | 0.0340946  |
| tRNA (uridine-5-oxyacetic acid methyl ester) 34 synthase                                                                        | 688.693302 | -0.3631142 | 0.13824546 | -2.6265905 | 0.03415153 |
| Chaperone protein HscA                                                                                                          | 5334.96913 | -0.3644543 | 0.13907563 | -2.6205478 | 0.03464174 |
| GDDEF/EAL domain protein YjhH                                                                                                   | 1287.79487 | -0.3648129 | 0.14046484 | -2.5971831 | 0.0366319  |
| Cell volume regulation protein A                                                                                                | 2456.37162 | -0.3649466 | 0.10428882 | -3.4993839 | 0.0033297  |
| Preprotein translocase subunit YajC (TC 3.A.5.1.1)                                                                              | 1223.28176 | -0.3696381 | 0.12962233 | -2.8516544 | 0.01964087 |
| Putative membrane protein                                                                                                       | 356.281465 | -0.3709061 | 0.12245673 | -3.0288751 | 0.01263273 |
| Putative transport protein                                                                                                      | 367.824863 | -0.3714695 | 0.11815893 | -3.1438121 | 0.00942769 |
| Methionine aminopeptidase                                                                                                       | 2909.26327 | -0.371499  | 0.14529757 | -2.5568151 | 0.04034968 |
| DedA family inner membrane protein YghB                                                                                         | 1238.41505 | -0.3715263 | 0.13242619 | -2.805535  | 0.02217767 |
| Flagellar hook-associated protein FlgK                                                                                          | 13092.2058 | -0.3718597 | 0.15034618 | -2.4733565 | 0.04854742 |
| Translation elongation factor P                                                                                                 | 1785.40411 | -0.3739858 | 0.14253572 | -2.6238038 | 0.03440217 |
| Intramembrane protease RasP/FluC%2C implicated in cell division based on FtsL cleavage                                          | 5497.80479 | -0.3763198 | 0.09030667 | -4.1671314 | 0.00033795 |
| Helicase PriA essential for oriC/DnaA-independent DNA replication                                                               | 985.557407 | -0.3766045 | 0.15313669 | -2.45927   | 0.04989904 |
| Putative membrane protein YeiH                                                                                                  | 435.300601 | -0.3791093 | 0.14950698 | -2.5357297 | 0.04239793 |

|                                                                                                                                      |            |            |            |            |            |
|--------------------------------------------------------------------------------------------------------------------------------------|------------|------------|------------|------------|------------|
| Transport ATP-binding protein CydD                                                                                                   | 1519.19925 | -0.3795236 | 0.13805272 | -2.749121  | 0.02558363 |
| Formyltetrahydrofolate deformylase                                                                                                   | 2021.73119 | -0.380133  | 0.14377577 | -2.6439293 | 0.03279438 |
| Flagellar motor rotation protein MotB                                                                                                | 6405.18855 | -0.3821519 | 0.10107438 | -3.7808977 | 0.00133428 |
| Mobile element protein                                                                                                               | 307.368263 | -0.3836188 | 0.15344175 | -2.5000943 | 0.0459545  |
| hypothetical protein                                                                                                                 | 754.064763 | -0.3843729 | 0.13843959 | -2.7764668 | 0.02384287 |
| Phosphoheptose isomerase                                                                                                             | 1144.80799 | -0.3872882 | 0.11434229 | -3.3870948 | 0.00468228 |
| mannose-specific adhesin FimH                                                                                                        | 8981.21702 | -0.3908745 | 0.14983756 | -2.6086548 | 0.03574463 |
| DnaI-like protein DIIA                                                                                                               | 508.761287 | -0.3923599 | 0.14538876 | -2.6986946 | 0.02885018 |
| Malonyl CoA-acyl carrier protein transacylase                                                                                        | 100135.788 | -0.3936235 | 0.13045031 | -3.0174209 | 0.01303867 |
| Putative 3-hydroxyacyl-coa dehydrogenase                                                                                             | 35263.207  | -0.3943816 | 0.15969332 | -2.4696188 | 0.04890396 |
| Superoxide dismutase [Fe]                                                                                                            | 1003.89898 | -0.3960929 | 0.14994765 | -2.6415412 | 0.03296828 |
| Ferric hydroxamate ABC transporter (TC 3.A.1.14.3)%2C permease component FhuB                                                        | 1994.63147 | -0.3960954 | 0.11899272 | -3.3287366 | 0.00555548 |
| Alanine transaminase                                                                                                                 | 2222.7736  | -0.3997793 | 0.1606035  | -2.4892315 | 0.04696122 |
| Hypothetical response regulatory protein ypdB                                                                                        | 929.566183 | -0.4002716 | 0.12959487 | -3.0886376 | 0.01077637 |
| Topoisomerase IV subunit B                                                                                                           | 2373.23924 | -0.4003911 | 0.09726079 | -4.1166751 | 0.00040249 |
| Rod shape-determining protein RodA                                                                                                   | 849.049179 | -0.4006775 | 0.13085797 | -3.0619264 | 0.01156736 |
| COG1272: Predicted membrane protein hemolysin III homolog                                                                            | 7051.30042 | -0.4007365 | 0.12493708 | -3.2075066 | 0.00781289 |
| Ferric enterobactin transport system permease protein fepD                                                                           | 1786.77911 | -0.4007924 | 0.14287427 | -2.8052104 | 0.02217767 |
| UPF0141 membrane protein YijP possibly required for phosphoethanolamine modification of lipopolysaccharide                           | 2137.15611 | -0.4012299 | 0.14871935 | -2.6978994 | 0.02866641 |
| Hydrolase%2C alpha/beta fold family functionally coupled to Phosphoribulokinase                                                      | 415.270284 | -0.4032717 | 0.14139922 | -2.8520077 | 0.01963862 |
| Probable sugar efflux transporter                                                                                                    | 1227.68775 | -0.4033131 | 0.14006342 | -2.8795038 | 0.01827833 |
| YehQ protein                                                                                                                         | 318.686561 | -0.4037377 | 0.13561332 | -2.9771242 | 0.01430341 |
| ATP synthase delta chain                                                                                                             | 5544.83326 | -0.4044741 | 0.12139491 | -3.3318871 | 0.0055205  |
| Type I restriction-modification system%2CDNA-methyltransferase subunit M                                                             | 767.116031 | -0.4054401 | 0.14553508 | -2.7858581 | 0.02331919 |
| Putative phosphatase                                                                                                                 | 212.091335 | -0.4058738 | 0.14690384 | -2.7628538 | 0.024742   |
| Similarity with glutathionylspermidine synthase                                                                                      | 260.555657 | -0.406741  | 0.13446722 | -3.0248335 | 0.01277376 |
| Hydrogenase-2 operon protein hybE                                                                                                    | 366.169071 | -0.4072135 | 0.1168934  | -3.4836311 | 0.00345577 |
| Outer membrane protein YfgL%2C lipoprotein component of the protein assembly complex (forms a complex with YaeT%2C YfiO%2C and NlpB) | 4136.41525 | -0.4072954 | 0.10813442 | -3.7665661 | 0.00139223 |
| hypothetical protein                                                                                                                 | 12726.1034 | -0.4077892 | 0.10991564 | -3.71002   | 0.00168742 |
| ToIA protein                                                                                                                         | 1474.78108 | -0.4092828 | 0.11607408 | -3.5260487 | 0.0030698  |
| Dihydroneopterin triphosphate pyrophosphohydrolase type 2 (nudB)                                                                     | 995.7997   | -0.4095975 | 0.12629278 | -3.243238  | 0.00703956 |
| COG0613%2C Predicted metal-dependent phosphoesterases (PHP family)                                                                   | 582.563028 | -0.4100787 | 0.15725092 | -2.6077987 | 0.03577849 |
| DNA polymerase III delta subunit                                                                                                     | 878.748332 | -0.4104935 | 0.12899059 | -3.1603021 | 0.00895469 |
| Apolipoprotein N-acyltransferase                                                                                                     | 2055.91596 | -0.4135042 | 0.11189085 | -3.6956034 | 0.00176036 |
| 3-oxoacyl-(acyl carrier protein) synthase                                                                                            | 164.918045 | -0.4148123 | 0.15247314 | -2.72056   | 0.0273853  |
| Putative cytoplasmic protein                                                                                                         | 4255.31823 | -0.4151049 | 0.16008097 | -2.5930936 | 0.03698627 |
| Molybdenum transport ATP-binding protein ModC (TC 3.A.1.8.1)                                                                         | 3586.1961  | -0.4157076 | 0.13984379 | -2.9726571 | 0.01441139 |
| Methyl-accepting chemotaxis protein II (aspartate chemoreceptor protein)                                                             | 29396.2755 | -0.4162999 | 0.1356709  | -3.0684536 | 0.01136269 |
| FIG00639460: hypothetical protein                                                                                                    | 359.855596 | -0.4164634 | 0.13972056 | -2.9806882 | 0.01418917 |
| FIG00638276: hypothetical protein                                                                                                    | 277.6754   | -0.417977  | 0.14946538 | -2.7964806 | 0.02263168 |
| Cell division protein DivIC (FtsB)%2C stabilizes FtsL against RasP cleavage                                                          | 317.03434  | -0.4180968 | 0.15280028 | -2.7362304 | 0.02633427 |
| LSU ribosomal protein L17p                                                                                                           | 8056.39579 | -0.4199558 | 0.11684942 | -3.5939918 | 0.00247319 |
| Phospholipase A1 precursor                                                                                                           | 581.22611  | -0.4200017 | 0.13120763 | -3.2010465 | 0.00796968 |
| Dihydropterolate synthase                                                                                                            | 806.966311 | -0.4216991 | 0.11740797 | -3.5917419 | 0.00248395 |
| Ribosomal large subunit pseudouridine synthase C                                                                                     | 268.233042 | -0.4229132 | 0.17035563 | -2.4825312 | 0.04769938 |
| Ribosomal large subunit pseudouridine synthase B                                                                                     | 1120.0686  | -0.4231648 | 0.12265589 | -3.4500164 | 0.003845   |
| YaaH protein                                                                                                                         | 375.521196 | -0.4239101 | 0.14868954 | -2.8509745 | 0.01966334 |
| SSU ribosomal protein S11p (S14e)                                                                                                    | 20266.9191 | -0.4252203 | 0.11477833 | -3.7047089 | 0.00171348 |
| Uridine kinase                                                                                                                       | 449.283873 | -0.4255326 | 0.16899208 | -2.5180621 | 0.04418029 |
| D-glycero-D-manno-heptose 1%2C7-bisphosphate phosphatase                                                                             | 1440.26285 | -0.428029  | 0.13302927 | -3.2175552 | 0.00757514 |
| [NiFe] hydrogenase metallocenter assembly protein HydP                                                                               | 343.314087 | -0.4280918 | 0.17162187 | -2.4943893 | 0.04641833 |
| Putative inner membrane protein                                                                                                      | 196.903281 | -0.4289131 | 0.1573872  | -2.7252095 | 0.02705274 |
| Nicotinate-nucleotide adenyltransferase                                                                                              | 676.220514 | -0.4292999 | 0.14658719 | -2.9286316 | 0.01618754 |
| tRNA-specific 2-thiouridylase MnmA                                                                                                   | 1476.59262 | -0.431787  | 0.14580417 | -2.9614175 | 0.01483311 |
| Lipid-A-disaccharide synthase                                                                                                        | 2286.72711 | -0.4331732 | 0.14974429 | -2.8927526 | 0.01766789 |
| putative TYPE II DNA MODIFICATION ENZYME (METHYLTRANSFERASE)                                                                         | 1507.05642 | -0.4339041 | 0.16344651 | -2.6547163 | 0.03193317 |
| Ribonuclease III                                                                                                                     | 1470.58572 | -0.4348039 | 0.12221899 | -3.5575803 | 0.00277502 |
| Ferrichrome transport ATP-binding protein FhuC (TC 3.A.1.14.3)                                                                       | 277.444223 | -0.4359112 | 0.16341387 | -2.6675287 | 0.03087782 |
| Putative efflux (PET) family inner membrane protein YccS                                                                             | 674.722981 | -0.4359477 | 0.10129699 | -4.3036591 | 0.00019861 |
| Hydrogenase-2 large chain precursor                                                                                                  | 1361.61788 | -0.4360521 | 0.11159645 | -3.907401  | 0.0008511  |
| Putative heat shock protein YegD                                                                                                     | 469.972639 | -0.4373164 | 0.12449734 | -3.5126564 | 0.00319288 |
| Nucleoside 5-triphosphatase RdgB (dHAPT%2CdITP%2CXTp-specific)                                                                       | 422.615341 | -0.4381554 | 0.12614134 | -3.4735275 | 0.00356109 |
| FIG00638687: hypothetical protein                                                                                                    | 307.28466  | -0.4395677 | 0.17579645 | -2.5004354 | 0.04594777 |
| Vitamin B12 ABC transporter%2C B12-binding component BtuF                                                                            | 459.970678 | -0.4405705 | 0.16910738 | -2.6052706 | 0.03600597 |
| Chromosomal replication initiator protein DnaA                                                                                       | 4084.17936 | -0.4409597 | 0.11414855 | -3.8630338 | 0.00100346 |
| Uncharacterized HTH-type transcriptional regulator YegW                                                                              | 380.716534 | -0.4410182 | 0.14194554 | -3.1069536 | 0.01032358 |
| dTDP-glucose 4%2CG-dehydratase                                                                                                       | 1372.03878 | -0.4412796 | 0.13187172 | -3.3462794 | 0.00528819 |
| Endonuclease VIII                                                                                                                    | 863.660536 | -0.4417581 | 0.13420524 | -3.2916604 | 0.00616908 |
| Uracil phosphoribosyltransferase                                                                                                     | 458.004326 | -0.4422945 | 0.1788634  | -2.4728062 | 0.04854742 |
| Vitamin B12 ABC transporter%2C permease component BtuC                                                                               | 554.816702 | -0.443149  | 0.13487834 | -3.2855458 | 0.00627029 |
| FIG004798: Putative cytoplasmic protein                                                                                              | 410.346304 | -0.4451963 | 0.12025919 | -3.7019734 | 0.00172283 |
| Diaminopimelate epimerase                                                                                                            | 2567.83745 | -0.4452794 | 0.13419359 | -3.3181866 | 0.0057374  |
| Ribonucleotide reductase of class III (anaerobic)%2C activating protein                                                              | 363.747098 | -0.4457979 | 0.12469535 | -3.5750964 | 0.00263242 |
| RND efflux system%2C inner membrane transporter CmeB                                                                                 | 408.571266 | -0.4464405 | 0.1229968  | -3.6296918 | 0.00219926 |
| SSU rRNA (adenine[1518]-N(6)/adenine[1519]-N(6))-dimethyltransferase                                                                 | 2047.95125 | -0.4464644 | 0.11042648 | -4.0430917 | 0.00052565 |
| Putative sulfate permease                                                                                                            | 557.365636 | -0.44675   | 0.16044678 | -2.7844126 | 0.02340084 |
| ATP synthase A chain                                                                                                                 | 3011.55297 | -0.4485787 | 0.11256098 | -3.9852058 | 0.00064765 |
| Hydrogenase maturation protease                                                                                                      | 519.260871 | -0.4495743 | 0.13962434 | -3.2198853 | 0.0075611  |
| NADH ubiquinone oxidoreductase chain A                                                                                               | 1555.08101 | -0.4502829 | 0.13893184 | -3.2410344 | 0.00707661 |
| Lysyl-tRNA synthetase (class II)                                                                                                     | 5966.69267 | -0.4508126 | 0.10680495 | -4.2208964 | 0.00027107 |
| LSU ribosomal protein L21p                                                                                                           | 1394.96265 | -0.450934  | 0.17585882 | -2.564182  | 0.03967031 |
| Flagellar biosynthesis protein Flis                                                                                                  | 3802.9257  | -0.451132  | 0.12969826 | -3.4783196 | 0.00350868 |
| Fumarate reductase subunit C                                                                                                         | 430.714439 | -0.4515985 | 0.15332161 | -2.9454324 | 0.01549827 |
| PspA/IM30 family protein                                                                                                             | 150.93653  | -0.4551089 | 0.18305889 | -2.4861338 | 0.04729548 |
| Methyl-accepting chemotaxis protein I (serine chemoreceptor protein)                                                                 | 3714.31641 | -0.4554469 | 0.10204597 | -4.463154  | 0.00010462 |
| Leucyl/phenylalanyl-tRNA--protein transferase                                                                                        | 585.468572 | -0.455872  | 0.1154437  | -3.9488682 | 0.00073862 |
| Putative cytoplasmic protein                                                                                                         | 413.677847 | -0.4559921 | 0.13287272 | -3.4317964 | 0.00405153 |
| Protein of unknown function DUF484                                                                                                   | 1671.31847 | -0.4565862 | 0.15022571 | -3.0393345 | 0.01224394 |
| YbbM seven transmembrane helix protein                                                                                               | 419.180632 | -0.4566252 | 0.17015393 | -2.6836005 | 0.02977725 |
| Uridylate kinase                                                                                                                     | 1536.81814 | -0.4571935 | 0.10624041 | -4.303386  | 0.00019861 |
| LSU ribosomal protein L18p (L5e)                                                                                                     | 9004.4284  | -0.4579565 | 0.14925377 | -3.0683081 | 0.01136269 |
| 1%2C4-dihydroxy-2-naphthoate octaprenyltransferase                                                                                   | 323.160065 | -0.458248  | 0.15816519 | -2.8972746 | 0.01751201 |
| Putative transport protein                                                                                                           | 776.253435 | -0.458371  | 0.11735322 | -3.9059089 | 0.00085465 |
| Methyl-accepting chemotaxis protein IV (dipeptide chemoreceptor protein)                                                             | 553.025431 | -0.4590013 | 0.15859844 | -2.8941096 | 0.0176399  |
| Recombination protein RecR                                                                                                           | 1195.66453 | -0.4599073 | 0.11938862 | -3.852187  | 0.00103872 |
| Adenine phosphoribosyltransferase                                                                                                    | 828.578794 | -0.4599502 | 0.16110675 | -2.8549409 | 0.01947758 |
| hypothetical protein                                                                                                                 | 5799.38316 | -0.4608228 | 0.11674223 | -3.9473531 | 0.00074177 |
| 23S rRNA (guanine-N-2-)-methyltransferase rlmG                                                                                       | 360.988522 | -0.463621  | 0.15956878 | -2.9054618 | 0.01724762 |
| Cytochrome d ubiquinol oxidase subunit I                                                                                             | 28280.908  | -0.4640963 | 0.18606833 | -2.4942251 | 0.04641833 |
| SSU ribosomal protein S13p (S18e)                                                                                                    | 11408.743  | -0.4642153 | 0.1067431  | -4.3489026 | 0.00016903 |
| Guanosine-5'-triphosphate%2C3'-diphosphate pyrophosphatase                                                                           | 3962.42171 | -0.4646213 | 0.13006731 | -3.5721608 | 0.00264893 |
| Probable lipoprotein nlpC precursor                                                                                                  | 1467.74209 | -0.4648026 | 0.16871517 | -2.7549544 | 0.02525116 |
| 3-oxoacyl-[acyl-carrier-protein] synthase%2CKASIII                                                                                   | 4179.59095 | -0.464852  | 0.11550271 | -4.0245985 | 0.00056499 |
| Cell division protein MraZ                                                                                                           | 1694.3965  | -0.4648724 | 0.14073803 | -3.3031046 | 0.00597169 |
| Membrane protein YciC%2C linked to IspA                                                                                              | 622.406768 | -0.4654952 | 0.14138642 | -3.2923615 | 0.00616214 |
| SSU ribosomal protein S4p (S9e)                                                                                                      | 19848.4206 | -0.4692468 | 0.10264251 | -4.5716618 | 6.75E-05   |
| HTH-type transcriptional regulator prsX                                                                                              | 301.890568 | -0.469942  | 0.14992355 | -3.1345445 | 0.0096108  |
| UDP-N-acetylglucosamine 2-epimerase                                                                                                  | 1657.99154 | -0.4715598 | 0.10442329 | -4.5158493 | 8.31E-05   |
| 3-hydroxydecanoyl-[acyl-carrier-protein] dehydratase                                                                                 | 1456.975   | -0.471824  | 0.13044954 | -3.6169081 | 0.00229504 |

|                                                                                                         |            |            |            |            |            |
|---------------------------------------------------------------------------------------------------------|------------|------------|------------|------------|------------|
| DNA mismatch repair endonuclease MthH                                                                   | 361.697096 | -0.4727367 | 0.13544111 | -3.4903485 | 0.00340679 |
| Heat shock protein 60 family co-chaperone GroES                                                         | 969.240892 | -0.4743537 | 0.15224373 | -3.1157517 | 0.01008344 |
| Ribose operon repressor                                                                                 | 629.248933 | -0.474354  | 0.13805424 | -3.4359969 | 0.00400085 |
| Mobile element protein                                                                                  | 156.149743 | -0.4752622 | 0.17660806 | -2.691056  | 0.02935816 |
| FIG00639031: hypothetical protein                                                                       | 3162.10769 | -0.4777307 | 0.08313782 | -5.74625   | 2.72E-07   |
| Undecaprenyl diphosphate synthase                                                                       | 1970.65321 | -0.479649  | 0.10728718 | -4.4707018 | 0.00010158 |
| FIG002708: Protein SirB1                                                                                | 1055.62885 | -0.4809197 | 0.15694443 | -3.0642677 | 0.01149053 |
| Putative transporting ATPase                                                                            | 432.635908 | -0.4810618 | 0.14944489 | -3.2189911 | 0.00756505 |
| Biopolymer transport protein ExbD/TolR                                                                  | 5631.01149 | -0.4816113 | 0.1155803  | -4.1668977 | 0.00033795 |
| Beta-lactamase                                                                                          | 5206.86529 | -0.4819089 | 0.13000914 | -3.7067309 | 0.0017029  |
| Glutamate racemase                                                                                      | 1131.62133 | -0.4823543 | 0.15548086 | -3.1023386 | 0.01040048 |
| Ferric hydroxamate ABC transporter (TC 3.A.1.14.3)%2C ATP-binding protein PhuC                          | 1990.65658 | -0.4823589 | 0.12516819 | -3.8536857 | 0.0010344  |
| Phenylalanyl-tRNA synthetase alpha chain                                                                | 1900.91679 | -0.4846682 | 0.14636207 | -3.3114332 | 0.00586133 |
| Mobile element protein                                                                                  | 547.912043 | -0.4848566 | 0.15683604 | -3.0914871 | 0.01068611 |
| 6%2C7-dimethyl-8-ribityllumazine synthase                                                               | 1962.59834 | -0.4855632 | 0.09209149 | -5.2726173 | 3.21E-06   |
| Transcription termination protein NusB                                                                  | 2905.59854 | -0.4869585 | 0.10105263 | -4.81886   | 2.48E-05   |
| Hemin ABC transporter%2C permease protein                                                               | 1838.94768 | -0.4877754 | 0.14014063 | -3.480614  | 0.00348955 |
| Pyridoxamine 5'-phosphate oxidase                                                                       | 995.643504 | -0.4882235 | 0.17857658 | -2.733973  | 0.02646603 |
| Channel-forming transporter/cytolysins activator of TpsB family                                         | 694.178143 | -0.4883224 | 0.15692987 | -3.1117237 | 0.01019731 |
| Putative transcriptional regulator                                                                      | 945.700155 | -0.4887564 | 0.17682167 | -2.7641203 | 0.02466967 |
| Putative exported protein                                                                               | 1130.01363 | -0.4890033 | 0.14316635 | -3.4156302 | 0.00427436 |
| Formate dehydrogenase O alpha subunit                                                                   | 1711.33501 | -0.4906526 | 0.15674338 | -3.1302923 | 0.00972707 |
| DNA polymerase III alpha subunit                                                                        | 4809.90492 | -0.4912938 | 0.11061892 | -4.4413179 | 0.00011517 |
| Chaperone protein HscB                                                                                  | 1119.73263 | -0.49141   | 0.16291493 | -3.0163595 | 0.0130476  |
| Acetylglutamate kinase                                                                                  | 1840.57883 | -0.4923377 | 0.13298124 | -3.7023093 | 0.00172283 |
| Protein YjgK%2C linked to biofilm formation                                                             | 266.696471 | -0.4932333 | 0.19027853 | -2.5921647 | 0.03705452 |
| Sensor protein torS                                                                                     | 314.160686 | -0.4948813 | 0.1537231  | -3.2193036 | 0.00756505 |
| Orotidine 5'-phosphate decarboxylase                                                                    | 357.87162  | -0.4962682 | 0.13011141 | -3.8141789 | 0.00117874 |
| Tetraacyldisaccharide 4'-kinase                                                                         | 1275.86159 | -0.4965055 | 0.11936359 | -4.159606  | 0.0003458  |
| Cytochrome c-type protein NapC                                                                          | 106.285985 | -0.4965846 | 0.19072026 | -2.6037326 | 0.03610547 |
| Protein-export membrane protein SecF (TC 3.A.5.1.1)                                                     | 3432.96216 | -0.4978607 | 0.13330848 | -3.7346514 | 0.0015581  |
| Chemotaxis response regulator protein-glutamate methyltransferase CheB                                  | 6258.90078 | -0.499649  | 0.10882887 | -4.5911439 | 6.31E-05   |
| Adenylosuccinate synthetase                                                                             | 19221.6383 | -0.4997691 | 0.13438084 | -3.7190505 | 0.00164551 |
| GTP-binding protein TypA/BipA                                                                           | 12716.5113 | -0.4998341 | 0.10546113 | -4.7395098 | 3.44E-05   |
| Potassium efflux system KefA protein / Small-conductance mechanosensitive channel                       | 2118.29753 | -0.5003827 | 0.09899556 | -5.0545978 | 8.85E-06   |
| tRNA S(4)U 4-thiouridine synthase (former Thil) / Rhodanese-like domain required for thiamine synthesis | 694.427601 | -0.50107   | 0.16174797 | -3.0978444 | 0.01053432 |
| Outer membrane vitamin B12 receptor BtuB                                                                | 2791.90452 | -0.5012433 | 0.11736544 | -4.2707914 | 0.00022587 |
| NADH-ubiquinone oxidoreductase chain B                                                                  | 2683.91032 | -0.5021179 | 0.12540659 | -4.0039196 | 0.00060747 |
| Nitrate/nitrite sensor protein                                                                          | 558.149483 | -0.5028273 | 0.1188766  | -4.2298261 | 0.00026195 |
| FIG01046632: hypothetical protein                                                                       | 182.685045 | -0.5039169 | 0.18833101 | -2.6756978 | 0.03027018 |
| SSU ribosomal protein S15p (S13e)                                                                       | 2419.33737 | -0.5042601 | 0.12848905 | -3.9245378 | 0.0008057  |
| DNA polymerase I                                                                                        | 151.24013  | -0.5068701 | 0.2011683  | -2.519632  | 0.04402011 |
| Transcription termination protein NusA                                                                  | 10468.444  | -0.5077132 | 0.11767734 | -4.3144517 | 0.0001904  |
| Succinate dehydrogenase iron-sulfur protein                                                             | 1018.95186 | -0.50803   | 0.18489317 | -2.7463579 | 0.02572724 |
| Selenophosphate-dependent tRNA 2-selenouridine synthase                                                 | 190.476827 | -0.5092666 | 0.19296324 | -2.6391899 | 0.03313944 |
| UPF0125 protein yjfJ                                                                                    | 339.318558 | -0.5102458 | 0.15043406 | -3.3918234 | 0.00460896 |
| DcrB protein precursor                                                                                  | 2233.75397 | -0.5112556 | 0.12810392 | -3.9909446 | 0.00063486 |
| Peptide chain release factor 2%3B programmed frameshift-containing                                      | 1280.13894 | -0.5125746 | 0.15647166 | -3.2758305 | 0.00642023 |
| Twin-arginine translocation protein TatC                                                                | 1280.1823  | -0.5126379 | 0.13757371 | -3.7262779 | 0.00160489 |
| FIG00637874: hypothetical protein                                                                       | 233.505893 | -0.5126396 | 0.2001654  | -2.5610801 | 0.03995693 |
| N-acetyl-gamma-glutamyl-phosphate reductase                                                             | 2087.14565 | -0.5142657 | 0.13952828 | -3.6857454 | 0.00181706 |
| SSU ribosomal protein S9p (S16e)                                                                        | 11014.3927 | -0.5153609 | 0.12720088 | -4.0515512 | 0.00050924 |
| Ferrous iron transport protein B                                                                        | 20662.0601 | -0.5165664 | 0.14808874 | -3.4882217 | 0.00342024 |
| Membrane-bound lytic murein transglycosylase A precursor                                                | 735.1036   | -0.5168196 | 0.12637644 | -4.089525  | 0.00044441 |
| Ribosomal RNA large subunit methyltransferase F                                                         | 346.705877 | -0.5177215 | 0.16833723 | -3.0755021 | 0.01115706 |
| Spermidine Putrescine ABC transporter permease component PotB (TC 3.A.1.11.1)                           | 511.701549 | -0.5180375 | 0.17847706 | -2.9025438 | 0.01733718 |
| Acetylnorlithine aminotransferase                                                                       | 760.159676 | -0.5190834 | 0.13301404 | -3.9024708 | 0.00086169 |
| Transglycosylase%2C Slt family                                                                          | 135.144978 | -0.5196679 | 0.19819823 | -2.6219603 | 0.03452855 |
| MotA/TolQ/ExbB proton channel family protein                                                            | 7973.28486 | -0.51997   | 0.17942197 | -2.8980288 | 0.0175024  |
| Inner membrane protein                                                                                  | 582.159296 | -0.5206613 | 0.15946289 | -3.265094  | 0.00663296 |
| Uridine kinase family protein YggC homolog                                                              | 345.736817 | -0.5209683 | 0.16590914 | -3.140082  | 0.00950118 |
| FIG01219785: hypothetical protein                                                                       | 269.104079 | -0.5216467 | 0.15665095 | -3.3299938 | 0.00554604 |
| S-adenosylmethionine:tRNA ribosyltransferase-isomerase                                                  | 382.790245 | -0.5231144 | 0.18098401 | -2.8903898 | 0.01776499 |
| Malonyl CoA-acyl carrier protein transacylase                                                           | 34460.3559 | -0.5242059 | 0.15526851 | -3.3761247 | 0.0048447  |
| Transcriptional regulator%2C ArsR family                                                                | 352.94627  | -0.5246724 | 0.19524186 | -2.6872948 | 0.02950264 |
| tRNA dihydrouridine synthase A                                                                          | 338.941955 | -0.5254654 | 0.13657842 | -3.8473532 | 0.00105529 |
| Biotin carboxylase of acetyl-CoA carboxylase                                                            | 3873.51692 | -0.5277994 | 0.11348645 | -4.6507704 | 4.98E-05   |
| Rod shape-determining protein MreC                                                                      | 1012.4145  | -0.5279664 | 0.17733653 | -2.9772003 | 0.01430341 |
| Transmembrane component STY3231 of energizing module of quoesine-regulated ECF transporter              | 97.684255  | -0.5281452 | 0.20827401 | -2.5358189 | 0.04239793 |
| Tyrosine recombinase XerC                                                                               | 2146.35478 | -0.5285944 | 0.19582519 | -2.6993175 | 0.02883683 |
| Butyryl-CoA dehydrogenase                                                                               | 36441.9106 | -0.5287443 | 0.16429304 | -3.2182999 | 0.00757348 |
| C4-dicarboxylate transporter DcuC (TC 2.A.61.1.1)                                                       | 151.677654 | -0.5293828 | 0.18870759 | -2.8053072 | 0.02217767 |
| LSU ribosomal protein L6p (L9e)                                                                         | 15017.5692 | -0.5313982 | 0.14429804 | -3.682643  | 0.0018361  |
| Putative HTH-type transcriptional regulator ypdC                                                        | 406.659181 | -0.5319167 | 0.14091367 | -3.7747698 | 0.00135728 |
| CDP-diacylglycerol-glycerol-3-phosphate-3-phosphatidyltransferase                                       | 2385.76425 | -0.5321028 | 0.16237902 | -3.2769188 | 0.00640651 |
| Putative TonB dependent outer membrane receptor                                                         | 989.055104 | -0.5322383 | 0.14539519 | -3.6606318 | 0.00198043 |
| Putative metalloprotease yggG                                                                           | 144.108077 | -0.5351779 | 0.18321578 | -2.9210253 | 0.01654632 |
| FIG00638699: hypothetical protein                                                                       | 201.743801 | -0.535244  | 0.1617846  | -3.3083743 | 0.00590078 |
| FIG00639050: hypothetical protein                                                                       | 571.063377 | -0.5356045 | 0.18446018 | -2.903632  | 0.01729491 |
| 2-haloalkanoic acid dehalogenase                                                                        | 1093.7659  | -0.5358225 | 0.15558201 | -3.4439875 | 0.00390812 |
| CFA/I fimbrial subunit Cusher protein                                                                   | 1107.0402  | -0.5364447 | 0.19835695 | -2.7044411 | 0.02848609 |
| Electron transport complex protein RnfG                                                                 | 395.807552 | -0.5367518 | 0.19542051 | -2.7466502 | 0.02572724 |
| Transcriptional regulatory protein CtiB%2C DpiA                                                         | 291.767715 | -0.5372467 | 0.18600715 | -2.8883124 | 0.01786456 |
| hypothetical protein                                                                                    | 801.873444 | -0.5373461 | 0.15903861 | -3.3787147 | 0.00480627 |
| Phosphate acetyltransferase                                                                             | 6588.46961 | -0.5383344 | 0.12940634 | -4.1600309 | 0.0003458  |
| Septum formation protein Maf                                                                            | 1045.66316 | -0.5392276 | 0.12307374 | -4.3813371 | 0.00014939 |
| regulator of length of O-antigen component of lipopolysaccharide chains                                 | 2406.58608 | -0.5450381 | 0.18790458 | -2.9006109 | 0.01742647 |
| Phosphogluconate repressor HexR%2C RpiR family                                                          | 466.925624 | -0.5456673 | 0.17574916 | -3.1048072 | 0.01032641 |
| ABC-type hemin transport system%2C ATPase component                                                     | 1198.03772 | -0.5497861 | 0.14020733 | -3.9212365 | 0.00081516 |
| Protein AtZg37660%2C chloroplast precursor                                                              | 135.856251 | -0.5499352 | 0.17892893 | -3.0734839 | 0.01121822 |
| 16S rRNA (cytosine(967)-C(5))-methyltransferase                                                         | 1150.43471 | -0.5513534 | 0.1417573  | -3.8894184 | 0.00090576 |
| Pantothenate:Na+ symporter (TC 2.A.21.1.1)                                                              | 419.347513 | -0.5524205 | 0.143522   | -3.8490304 | 0.00105014 |
| Oligopeptide transport system permease protein OppC (TC 3.A.1.5.1)                                      | 1950.87834 | -0.5528346 | 0.14994792 | -3.6868445 | 0.00181242 |
| FIG00642550: hypothetical protein                                                                       | 377.727543 | -0.5541761 | 0.16430596 | -3.3728303 | 0.00488882 |
| Transporter%62C putative                                                                                | 997.065378 | -0.5553204 | 0.14500126 | -3.8297624 | 0.00111624 |
| Fructose repressor FruR%2C LacI family                                                                  | 1546.25357 | -0.5555112 | 0.14695216 | -3.7802183 | 0.00133541 |
| Proposed lipolate regulatory protein YbeD                                                               | 542.850581 | -0.5556769 | 0.17075694 | -3.2541981 | 0.00684469 |
| Pyruvate formate-lyase                                                                                  | 158521.716 | -0.5564265 | 0.20996308 | -2.6501161 | 0.03229127 |
| TonB-dependent receptor%3B Outer membrane receptor for ferric enterobactin and colicins B%2C D          | 26153.7044 | -0.556752  | 0.1484766  | -3.7497629 | 0.00148068 |
| Cytochrome c55I peroxidase                                                                              | 92.3215826 | -0.5577706 | 0.21226142 | -2.6277531 | 0.0340946  |
| 2-keto-3-deoxy-D-arabino-heptulosonate-7-phosphate synthase I alpha                                     | 2469.18362 | -0.5593376 | 0.1965726  | -2.8454503 | 0.01994811 |
| Endonuclease III                                                                                        | 274.156569 | -0.5604811 | 0.16171569 | -3.4658425 | 0.00364217 |
| Flagellar biosynthesis protein FlitT                                                                    | 1685.66561 | -0.5633984 | 0.18713021 | -3.0107293 | 0.01323243 |
| Cytochrome O ubiquinol oxidase subunit I                                                                | 18674.4641 | -0.5651159 | 0.1737092  | -3.2532297 | 0.00684671 |
| putative inner membrane protein                                                                         | 1539.26018 | -0.5659602 | 0.1974052  | -2.8669975 | 0.01888269 |
| Periplasmic thiol:disulfide oxidoreductase DsbB%2Crequired for DsbA reoxidation                         | 452.472166 | -0.5663934 | 0.17718153 | -3.1966843 | 0.00808081 |
| Electron transport complex protein RnfD                                                                 | 443.335308 | -0.5667036 | 0.17440761 | -3.2493054 | 0.00691075 |
| Iron(III) dicitrate transport system%2C periplasmic iron-binding protein FecB (TC 3.A.1.14.1)           | 2087.56051 | -0.5698713 | 0.11764534 | -4.8439764 | 2.23E-05   |
| Methyl-accepting chemotaxis protein                                                                     | 11274.8531 | -0.5706603 | 0.20884351 | -2.732478  | 0.02653693 |

|                                                                                                                                              |            |            |            |            |            |
|----------------------------------------------------------------------------------------------------------------------------------------------|------------|------------|------------|------------|------------|
| Flagellar hook-associated protein FlgI                                                                                                       | 13966.17   | -0.5709941 | 0.13365441 | -4.2721682 | 0.00022505 |
| Transcriptional regulator for fatty acid degradation FadR%2C GntR family                                                                     | 953.20265  | -0.5734443 | 0.1193018  | -4.8066694 | 2.61E-05   |
| Xylanase                                                                                                                                     | 547.531655 | -0.5751289 | 0.13234024 | -4.3458354 | 0.00017048 |
| Putative two-component system response regulator YedW                                                                                        | 184.390784 | -0.5753404 | 0.20893798 | -2.7536421 | 0.02528066 |
| Hemin uptake protein HemP                                                                                                                    | 330.917688 | -0.5759298 | 0.17550039 | -3.2816439 | 0.00631479 |
| Rhodanese-related sulfotransferases                                                                                                          | 1943.60315 | -0.5809144 | 0.19471232 | -2.9834495 | 0.01412324 |
| Protein yihD                                                                                                                                 | 822.307619 | -0.5810055 | 0.20509583 | -2.832849  | 0.02066965 |
| DnaA regulatory inactivator Hda (Homologous to DnaA)                                                                                         | 1189.77062 | -0.5821046 | 0.12830507 | -4.536879  | 7.68E-05   |
| Flagellar hook-basal body complex protein FlIE                                                                                               | 77.3849327 | -0.5823976 | 0.23655862 | -2.461959  | 0.04963642 |
| Electron transport complex protein RnfC                                                                                                      | 1394.13816 | -0.5857621 | 0.13769046 | -4.254195  | 0.00023901 |
| lipid A biosynthesis lauroyl acyltransferase                                                                                                 | 3388.67392 | -0.5880925 | 0.12238461 | -4.8052815 | 2.61E-05   |
| Chemotaxis protein methyltransferase CheR                                                                                                    | 7460.05849 | -0.5882758 | 0.14945893 | -3.9360364 | 0.00077441 |
| Putative amidase                                                                                                                             | 11082.2711 | -0.5907957 | 0.15656695 | -3.7734385 | 0.00135946 |
| MotA/TolQ/ExbB proton channel family protein                                                                                                 | 931.011323 | -0.593401  | 0.19183783 | -3.0932432 | 0.0106603  |
| rRNA small subunit 7-methylguanosine (m7G) methyltransferase GidB                                                                            | 265.709324 | -0.5983906 | 0.18061715 | -3.313033  | 0.00583603 |
| Putative thiosulfate sulfurtransferase ynjE                                                                                                  | 112.202213 | -0.5987801 | 0.19339416 | -3.0961645 | 0.01058158 |
| tRNA (guanosine(18)-2'-O)-methyltransferase                                                                                                  | 570.259342 | -0.5992025 | 0.13001865 | -4.6085887 | 5.91E-05   |
| LSU ribosomal protein L13p (L13Ae)                                                                                                           | 7106.46879 | -0.5992031 | 0.129383   | -4.6312354 | 5.39E-05   |
| Nicotinamide-nucleotide adenyllyltransferase%2C NadR family                                                                                  | 121.627822 | -0.5998813 | 0.17442936 | -3.4391072 | 0.00396733 |
| NADH dehydrogenase                                                                                                                           | 8056.77471 | -0.6001208 | 0.12755997 | -4.7046174 | 3.98E-05   |
| Putative membrane protein YfcA                                                                                                               | 521.263424 | -0.6009675 | 0.14101843 | -4.2616236 | 0.00023354 |
| Radical SAM family enzyme%2C similar to coproporphyrinogen III oxidase%2COxygen-independent%2C clustered with nucleoside-triphosphatase RdgB | 578.909509 | -0.6023417 | 0.13165336 | -4.5752095 | 6.68E-05   |
| Ribose-phosphate pyrophosphokinase                                                                                                           | 4169.78225 | -0.6067156 | 0.09820109 | -6.1782982 | 2.44E-08   |
| Capsular polysaccharide export system protein Kps5                                                                                           | 406.806889 | -0.6080348 | 0.21179742 | -2.8708317 | 0.01869275 |
| Flagellar motor rotation protein MotA                                                                                                        | 6588.39991 | -0.6080978 | 0.15829481 | -3.8415523 | 0.00107845 |
| Pyridoxal kinase                                                                                                                             | 716.701991 | -0.6087251 | 0.13116552 | -4.6408931 | 5.19E-05   |
| Predicted N-ribosylNicotinamide CRP-like regulator                                                                                           | 125.389248 | -0.6115316 | 0.22756389 | -2.6872965 | 0.02950264 |
| Protein-export membrane protein SecD (TC 3.A.5.1.1)                                                                                          | 5136.19535 | -0.6138082 | 0.12001747 | -5.1143235 | 6.85E-06   |
| 16S rRNA processing protein RimM                                                                                                             | 10176.7337 | -0.6147445 | 0.12204913 | -5.0368611 | 9.58E-06   |
| LSU ribosomal protein L28p                                                                                                                   | 3203.98423 | -0.6155653 | 0.13280531 | -4.6350955 | 5.32E-05   |
| Antiholin-like protein LrgA                                                                                                                  | 251.011027 | -0.6160694 | 0.15644635 | -3.9378955 | 0.00077002 |
| Putative Diguanylate cyclase/phosphodiesterase domain 1                                                                                      | 3210.01731 | -0.6168721 | 0.1155086  | -5.3404862 | 2.27E-06   |
| Dipeptide transport system permease protein DppB (TC 3.A.1.5.2)                                                                              | 628.318738 | -0.6169999 | 0.18239864 | -3.3827002 | 0.00474397 |
| Carbamoyl-phosphate synthase small chain                                                                                                     | 815.036749 | -0.6172297 | 0.20007295 | -3.0850232 | 0.01085687 |
| FIG00638676: hypothetical protein                                                                                                            | 481.750213 | -0.6180887 | 0.22789458 | -2.7121694 | 0.02790724 |
| Formate dehydrogenase H                                                                                                                      | 261.468475 | -0.6201919 | 0.23837854 | -2.6017103 | 0.03628772 |
| Cell division trigger factor                                                                                                                 | 7752.5804  | -0.620767  | 0.12470118 | -4.9780362 | 1.24E-05   |
| Acetate kinase                                                                                                                               | 4674.12895 | -0.6216035 | 0.14993981 | -4.1456867 | 0.00036401 |
| RNA polymerase sigma factor FecI                                                                                                             | 4674.94521 | -0.6230556 | 0.15668194 | -3.9765632 | 0.00066738 |
| Putative membrane protein                                                                                                                    | 246.982285 | -0.6241304 | 0.13768055 | -4.5331779 | 7.75E-05   |
| Penicillin-binding protein 2 (PBP-2)                                                                                                         | 935.818573 | -0.6264196 | 0.15525786 | -4.034705  | 0.00054359 |
| LSU ribosomal protein L34p                                                                                                                   | 274.702499 | -0.6291344 | 0.19078555 | -3.2975996 | 0.00605662 |
| 2-amino-4-hydroxy-6-hydroxymethylidihydropteridine pyrophosphokinase                                                                         | 207.724558 | -0.6293355 | 0.20179195 | -3.1187343 | 0.00999404 |
| GTP-binding protein Obg                                                                                                                      | 2231.98927 | -0.6298523 | 0.14589056 | -4.3172928 | 0.00018874 |
| Ribose ABC transport system%2C high affinity permease RbsD (TC 3.A.1.2.1)                                                                    | 1357.5779  | -0.631597  | 0.24951978 | -2.5312503 | 0.04287184 |
| FIG00638308: hypothetical protein                                                                                                            | 1904.10203 | -0.632356  | 0.1533404  | -4.1238705 | 0.00039283 |
| Arginine ABC transporter%2C periplasmic arginine-binding protein ArtJ                                                                        | 925.792316 | -0.6348849 | 0.19010209 | -3.3397051 | 0.00538604 |
| FIG00638396: hypothetical protein                                                                                                            | 1887.57128 | -0.6351438 | 0.17686501 | -3.5911219 | 0.00248395 |
| Protein YkiA                                                                                                                                 | 171.512217 | -0.6372198 | 0.19718561 | -3.2315736 | 0.00727749 |
| Ornithine carbamoyltransferase                                                                                                               | 1797.07289 | -0.6381385 | 0.14686935 | -4.34494   | 0.00017072 |
| Deoxyribonuclease TatD                                                                                                                       | 501.713515 | -0.6390546 | 0.17331801 | -3.6871792 | 0.00181242 |
| ATP-dependent DNA helicase RecG                                                                                                              | 1406.12534 | -0.641655  | 0.12679827 | -5.0604397 | 8.66E-06   |
| tRNA (Guanine37-N1)-methyltransferase                                                                                                        | 10920.569  | -0.6438212 | 0.12474361 | -5.161156  | 5.45E-06   |
| FIG00613574: hypothetical protein                                                                                                            | 2227.58254 | -0.6440949 | 0.11832777 | -5.4433114 | 1.35E-06   |
| Transcription elongation factor GreA                                                                                                         | 504.84441  | -0.6457996 | 0.19022694 | -3.3948906 | 0.00457102 |
| Holliday junction resolvase / Crossover junction endodeoxyribonuclease RusA                                                                  | 87.7136731 | -0.6471992 | 0.2313676  | -2.7972768 | 0.02261968 |
| Signal peptidase I                                                                                                                           | 2060.32481 | -0.6490217 | 0.13098064 | -4.9550964 | 1.38E-05   |
| Probable acyltransferase yihG                                                                                                                | 58.7316048 | -0.6501904 | 0.25790659 | -2.5210308 | 0.04393608 |
| iron acquisition yersiniabactin synthesis enzyme (Irp2)                                                                                      | 40439.8936 | -0.6505885 | 0.16402667 | -3.9663578 | 0.00069079 |
| Methionine repressor MetJ                                                                                                                    | 730.40687  | -0.6516779 | 0.15979903 | -4.0781093 | 0.00046053 |
| Transposase Ecs0136                                                                                                                          | 102.820277 | -0.6519462 | 0.20854341 | -3.1261896 | 0.00980359 |
| Ferrichrome-iron receptor                                                                                                                    | 752.47826  | -0.656616  | 0.24313116 | -2.7006659 | 0.02875862 |
| Iron(III) dicitrate transmembrane sensor protein FecR                                                                                        | 10308.2193 | -0.6587652 | 0.12947976 | -5.0877847 | 7.68E-06   |
| Ribonuclease HII                                                                                                                             | 753.84824  | -0.6590683 | 0.11091867 | -5.9419057 | 9.19E-08   |
| Uracil permease                                                                                                                              | 157.3716   | -0.6592649 | 0.20119082 | -3.2768143 | 0.00640651 |
| AmpG permease                                                                                                                                | 300.213715 | -0.6601814 | 0.21844133 | -3.0222368 | 0.01286929 |
| Membrane-bound lytic murein transglycosylase D precursor                                                                                     | 2364.25065 | -0.6626053 | 0.14802395 | -4.4763381 | 9.92E-05   |
| Inosine-guanosine kinase                                                                                                                     | 945.745678 | -0.6639907 | 0.17017508 | -3.9018091 | 0.00086233 |
| Flagellar biosynthesis protein FlhA                                                                                                          | 925.576248 | -0.6643163 | 0.13689354 | -4.8527949 | 2.17E-05   |
| tRNA-guanine transglycosylase                                                                                                                | 1108.73629 | -0.6657512 | 0.13309527 | -5.0020651 | 1.12E-05   |
| YjcB protein                                                                                                                                 | 770.081553 | -0.6676545 | 0.22098348 | -3.0212868 | 0.01289515 |
| FxaA protein                                                                                                                                 | 367.575725 | -0.6720807 | 0.19362    | -3.4711324 | 0.00358753 |
| Type I restriction-modification system%2C specificity subunit S                                                                              | 361.448884 | -0.6729412 | 0.1410373  | -4.7713706 | 3.04E-05   |
| Iron(II) dicitrate transport protein FecA                                                                                                    | 6196.17479 | -0.6790644 | 0.10734977 | -6.3257176 | 1.06E-08   |
| Putative S-transferase                                                                                                                       | 106.129579 | -0.6791765 | 0.2067679  | -3.284729  | 0.00627427 |
| Spermidine Putrescine ABC transporter permease component potC (TC_3.A.1.11.1)                                                                | 378.604011 | -0.6818442 | 0.20024129 | -3.405113  | 0.00442277 |
| tRNA:Cm32/Urn32 methyltransferase                                                                                                            | 1750.013   | -0.6842178 | 0.12900928 | -5.3036322 | 2.75E-06   |
| Ferric hydroxamate ABC transporter (TC 3.A.1.14.3)%2C periplasmic substrate binding protein FhuD                                             | 1481.15143 | -0.6848927 | 0.11286336 | -6.0683349 | 4.61E-08   |
| tRNA(Cytosine32)-2-thiocytidine synthetase                                                                                                   | 325.403142 | -0.6875602 | 0.15278389 | -4.500214  | 8.92E-05   |
| Rod shape-determining protein MreD                                                                                                           | 400.157075 | -0.6878692 | 0.13690338 | -5.0244866 | 1.01E-05   |
| FIG003671: Metal-dependent hydrolase                                                                                                         | 50.8489424 | -0.6897048 | 0.26726515 | -2.5806014 | 0.0381273  |
| MFS superfamily export protein YceL                                                                                                          | 1185.63428 | -0.6899476 | 0.21272762 | -3.243338  | 0.00703956 |
| Putative F1C and S fimbrial switch Regulatory protein                                                                                        | 695.691731 | -0.6904829 | 0.21036623 | -3.2822896 | 0.00630913 |
| Ferrous iron-sensing transcriptional regulator FeoC                                                                                          | 2347.48794 | -0.6906907 | 0.17256903 | -4.0024024 | 0.00061007 |
| LSU ribosomal protein L9p                                                                                                                    | 7309.13822 | -0.6914604 | 0.14091008 | -4.9071041 | 1.72E-05   |
| FIG00643651: hypothetical protein                                                                                                            | 500.186742 | -0.6927138 | 0.19478013 | -3.5563882 | 0.00278096 |
| FIG004454: RNA binding protein                                                                                                               | 319.887521 | -0.6942754 | 0.21675179 | -3.2030895 | 0.00792353 |
| SSU ribosomal protein S16p                                                                                                                   | 1583.63638 | -0.6942937 | 0.13795336 | -5.0328145 | 9.74E-06   |
| LSU ribosomal protein L7/L12 (P1/P2)                                                                                                         | 7189.81315 | -0.6950179 | 0.1399871  | -4.964871  | 1.32E-05   |
| Di/tripeptide permease YbgH                                                                                                                  | 1120.99953 | -0.6966691 | 0.17945618 | -3.8821129 | 0.00092972 |
| FIG00638928: hypothetical protein                                                                                                            | 298.630858 | -0.6981196 | 0.17781314 | -3.9261417 | 0.00080199 |
| FIG00639097: hypothetical protein                                                                                                            | 40.8008187 | -0.7028861 | 0.28170185 | -2.495142  | 0.04637377 |
| LSU ribosomal protein L22p (L17e)                                                                                                            | 5798.05079 | -0.7104902 | 0.18509382 | -3.8385409 | 0.00108964 |
| Crotonobetainyl-CoA dehydrogenase                                                                                                            | 204.188998 | -0.7160645 | 0.19623815 | -3.6489566 | 0.00205784 |
| Multidrug resistance protein D                                                                                                               | 229.409142 | -0.7203779 | 0.18323672 | -3.9314058 | 0.00078786 |
| Transcriptional repressor for pyruvate dehydrogenase complex                                                                                 | 2420.05459 | -0.7246215 | 0.15956963 | -4.5410991 | 7.55E-05   |
| Iron(III) dicitrate transport system permease protein FecD (TC 3.A.1.14.1)                                                                   | 311.066747 | -0.7249015 | 0.15224849 | -4.7613054 | 3.15E-05   |
| Dethiobiotin synthetase                                                                                                                      | 602.869413 | -0.725663  | 0.21626374 | -3.3554537 | 0.0051395  |
| IdE-gene:EBG00000313244                                                                                                                      | 70.8350168 | -0.725848  | 0.29316561 | -2.4758975 | 0.04828337 |
| Ribosomal protein S12p Asp88 (E. coli) methylthiotransferase                                                                                 | 575.182883 | -0.7296295 | 0.17737234 | -4.1135472 | 0.00040704 |
| SSU ribosomal protein S7p (S5e)                                                                                                              | 6659.0418  | -0.7299363 | 0.12279407 | -5.9443931 | 9.18E-08   |
| Lipoprotein nlpl precursor                                                                                                                   | 28890.9861 | -0.730719  | 0.13122613 | -5.5683953 | 7.04E-07   |
| FIG00638745: hypothetical protein                                                                                                            | 97.3492211 | -0.7326361 | 0.2038304  | -3.5943417 | 0.00247319 |
| DNA recombination and repair protein RecF                                                                                                    | 480.588226 | -0.7327044 | 0.18232141 | -4.0187512 | 0.00057543 |
| Putative polyketide synthase                                                                                                                 | 12346.8957 | -0.7382148 | 0.15840418 | -4.6603244 | 4.77E-05   |
| Putative membrane protein                                                                                                                    | 74.2474815 | -0.7419864 | 0.25426984 | -2.9181063 | 0.01668456 |
| hypothetical protein                                                                                                                         | 103.3483   | -0.7451306 | 0.28418767 | -2.6219666 | 0.03452855 |
| Cold shock protein CspE                                                                                                                      | 20839.2492 | -0.7534916 | 0.26730482 | -2.8188477 | 0.02144479 |
| Alcohol dehydrogenase                                                                                                                        | 339377.314 | -0.7568211 | 0.20727592 | -3.6512736 | 0.00204338 |

|                                                                                           |            |            |            |            |            |
|-------------------------------------------------------------------------------------------|------------|------------|------------|------------|------------|
| Serine transporter                                                                        | 165.408819 | -0.7595483 | 0.212594   | -3.5727645 | 0.0026487  |
| Adenylate kinase                                                                          | 1506.15856 | -0.761586  | 0.17335946 | -4.3931032 | 0.00014192 |
| Putative vimentin                                                                         | 8629.64874 | -0.7630312 | 0.16896854 | -4.5158179 | 8.31E-05   |
| Mg-chelatae subunit ChlD                                                                  | 52.4019351 | -0.7631503 | 0.28381633 | -2.688888  | 0.02946959 |
| LSU ribosomal protein L33p @ LSU ribosomal protein L33p%2C zinc-independent               | 2289.36561 | -0.7668672 | 0.13922867 | -5.5079692 | 9.51E-07   |
| Formate efflux transporter (TC 2.A.44 family)                                             | 6793.22688 | -0.7686879 | 0.17754028 | -4.3296533 | 0.00018009 |
| Cold shock protein CspG                                                                   | 668.951754 | -0.7731291 | 0.27010067 | -2.8623738 | 0.01941116 |
| chaperone FimC                                                                            | 4003.03114 | -0.7770408 | 0.18726205 | -4.1494834 | 0.00036058 |
| FIG00638753: hypothetical protein                                                         | 186.163003 | -0.7791891 | 0.18701356 | -4.1664849 | 0.00033795 |
| Flagellar biosynthesis protein FlIZ                                                       | 2627.83053 | -0.7812604 | 0.22084508 | -3.5375947 | 0.00294812 |
| FIG00637977: hypothetical protein                                                         | 54.1013557 | -0.7813842 | 0.25996537 | -3.0057242 | 0.01337692 |
| hypothetical protein                                                                      | 1490.33042 | -0.7820024 | 0.21082236 | -3.7092955 | 0.00168877 |
| Ni/Fe-hydrogenase Z B-type cytochrome subunit                                             | 162.139041 | -0.7835281 | 0.19696674 | -3.9779718 | 0.00066625 |
| Xanthine-guanine phosphoribosyltransferase                                                | 420.373316 | -0.784724  | 0.21100015 | -3.7190683 | 0.00164551 |
| Multimodular transpeptidase-transglycosylase                                              | 1102.0615  | -0.7851494 | 0.15381523 | -5.1044971 | 7.16E-06   |
| Iron(III) dicitrate transport ATP-binding protein FecE (TC 3.A.1.14.1)                    | 506.579689 | -0.7869178 | 0.14164736 | -5.5554712 | 7.47E-07   |
| Succinate dehydrogenase flavoprotein subunit                                              | 3438.81666 | -0.7870019 | 0.16160631 | -4.8698713 | 2.03E-05   |
| Putative inner membrane protein                                                           | 9765.06262 | -0.7886912 | 0.15726943 | -5.0149047 | 1.06E-05   |
| Inner membrane protein YccF                                                               | 87.8181866 | -0.7931317 | 0.27603955 | -2.8732538 | 0.01860624 |
| FIG00637875: hypothetical protein                                                         | 1036.30947 | -0.7951098 | 0.13953417 | -5.698316  | 3.47E-07   |
| LSU ribosomal protein L1p (L10Ae)                                                         | 13816.5504 | -0.7953975 | 0.14895736 | -5.3397662 | 2.27E-06   |
| tRNA dihydrouridine synthase B                                                            | 2403.73298 | -0.7968735 | 0.17168847 | -4.6413921 | 5.19E-05   |
| Mobile element protein                                                                    | 260.278214 | -0.7989789 | 0.26869378 | -2.9735667 | 0.01439731 |
| SSU ribosomal protein S6p                                                                 | 5694.04185 | -0.8038775 | 0.14465511 | -5.5572008 | 7.44E-07   |
| LSU ribosomal protein L19p                                                                | 2715.93582 | -0.8134661 | 0.17191662 | -4.7317475 | 3.55E-05   |
| Phosphate:acyl-ACP acyltransferase PlsX                                                   | 2135.21453 | -0.8171172 | 0.12198816 | -6.6983323 | 1.05E-09   |
| SSU ribosomal protein S12p (S23e)                                                         | 4859.21461 | -0.8220996 | 0.1410455  | -5.8286125 | 1.75E-07   |
| Cytochrome O ubiquinol oxidase subunit II                                                 | 8174.7509  | -0.8253167 | 0.14660413 | -5.6295599 | 5.06E-07   |
| FIG00639065: hypothetical protein                                                         | 39.4776029 | -0.8266911 | 0.32199648 | -2.5673917 | 0.03937157 |
| Transposase YhgA                                                                          | 71.9915992 | -0.8280245 | 0.23744765 | -3.4871875 | 0.00342402 |
| Iron(III) dicitrate transport system permease protein FecC (TC 3.A.1.14.1)                | 409.710578 | -0.8291408 | 0.11975131 | -6.9238559 | 2.34E-10   |
| ID=gene:EBG00000313283                                                                    | 35.9648682 | -0.8299305 | 0.32994529 | -2.5153579 | 0.04441064 |
| ID=gene:EBG00000313290                                                                    | 35.9648682 | -0.8299305 | 0.32994529 | -2.5153579 | 0.04441064 |
| Probable microcin H47 secretion/processing ATP-binding protein mchF                       | 1897.19603 | -0.8308193 | 0.1400337  | -5.9329957 | 9.63E-08   |
| FIG00639275: hypothetical protein                                                         | 356.487003 | -0.8308392 | 0.16727413 | -4.9669317 | 1.31E-05   |
| UPF0313 protein ygiQ                                                                      | 853.764384 | -0.8346244 | 0.19053106 | -4.3805163 | 0.00014953 |
| LSU ribosomal protein L10p (P0)                                                           | 9807.32752 | -0.8356813 | 0.14575396 | -5.7335064 | 2.92E-07   |
| Colicin I receptor precursor                                                              | 8828.14569 | -0.8456034 | 0.19804088 | -4.2698428 | 0.00022625 |
| ID=gene:EBG00000313275                                                                    | 48.5788764 | -0.8474508 | 0.27823935 | -3.045762  | 0.01202632 |
| ID=gene:EBG00000313277                                                                    | 48.5788764 | -0.8474508 | 0.27823935 | -3.045762  | 0.01202632 |
| ID=gene:EBG00000313278                                                                    | 48.5788764 | -0.8474508 | 0.27823935 | -3.045762  | 0.01202632 |
| ID=gene:EBG00000313281                                                                    | 48.5788764 | -0.8474508 | 0.27823935 | -3.045762  | 0.01202632 |
| ID=gene:EBG00000313282                                                                    | 48.5788764 | -0.8474508 | 0.27823935 | -3.045762  | 0.01202632 |
| ID=gene:EBG00000313305                                                                    | 48.5788764 | -0.8474508 | 0.27823935 | -3.045762  | 0.01202632 |
| Arginine/ornithine antiporter ArcD                                                        | 253.725426 | -0.8475075 | 0.15838114 | -5.3510635 | 2.17E-06   |
| Translation initiation factor 1                                                           | 1399.23179 | -0.8485328 | 0.17497622 | -4.8494176 | 2.19E-05   |
| Serine transporter                                                                        | 370.853602 | -0.8566234 | 0.16878352 | -5.0752788 | 8.12E-06   |
| SSU ribosomal protein S14p (S29e) @ SSU ribosomal protein S14p (S29e)%2C zinc-independent | 12694.6835 | -0.8607791 | 0.12371149 | -6.9579564 | 1.89E-10   |
| FIG00639812: hypothetical protein                                                         | 34.03305   | -0.8657513 | 0.34792685 | -2.488314  | 0.0470445  |
| Inner membrane protein translocase component YidC%2C long form                            | 4376.35652 | -0.8726664 | 0.18486502 | -4.72056   | 3.73E-05   |
| Oligopeptide transport system permease protein OppB (TC 3.A.1.5.1)                        | 1949.61076 | -0.8742428 | 0.17555897 | -4.9797675 | 1.24E-05   |
| MchC protein                                                                              | 2724.36984 | -0.8777576 | 0.16974602 | -5.1710056 | 5.23E-06   |
| LSU ribosomal protein L2p (L8e)                                                           | 15822.2664 | -0.8812465 | 0.17012792 | -5.1799054 | 5.03E-06   |
| Putative protease                                                                         | 856.675488 | -0.8828043 | 0.15446061 | -5.7154004 | 3.18E-07   |
| 4-hydroxybenzoyl-CoA thioesterase family active site                                      | 311.52654  | -0.8847746 | 0.23803706 | -3.7169615 | 0.00165617 |
| LSU ribosomal protein L5p (L11e)                                                          | 16545.5443 | -0.8925039 | 0.1347744  | -6.6222065 | 1.71E-09   |
| Ribonuclease P protein component                                                          | 923.659149 | -0.8984335 | 0.21705259 | -4.1392435 | 0.00037325 |
| Flagellar biosynthesis protein FlnB                                                       | 437.932851 | -0.8989436 | 0.18630073 | -4.8252284 | 2.44E-05   |
| Hypothetical protein yggB                                                                 | 54.4410204 | -0.9062861 | 0.31471173 | -2.8797341 | 0.01827833 |
| hypothetical protein                                                                      | 166.841032 | -0.9097051 | 0.25742866 | -3.5338145 | 0.0029858  |
| SSU ribosomal protein S19p (S15e)                                                         | 1941.75408 | -0.9097771 | 0.18001943 | -5.0537715 | 8.85E-06   |
| Permease of the drug/metabolite transporter (DMT) superfamily                             | 891.750038 | -0.9136549 | 0.22217121 | -4.1123911 | 0.00040815 |
| LSU ribosomal protein L23p (L23Ae)                                                        | 6314.60346 | -0.9138743 | 0.17608874 | -5.1898056 | 4.80E-06   |
| Glutamyl-tRNA reductase                                                                   | 1716.31879 | -0.9193003 | 0.14865779 | -6.1840036 | 2.38E-08   |
| Glucans biosynthesis protein C                                                            | 89.3560546 | -0.9203646 | 0.26364886 | -3.4908728 | 0.00340542 |
| ID=gene:EBG00000313286                                                                    | 130.832878 | -0.928616  | 0.3084297  | -3.0107866 | 0.01323243 |
| ID=gene:EBG00000313289                                                                    | 130.832878 | -0.928616  | 0.3084297  | -3.0107866 | 0.01323243 |
| FIG00642441: hypothetical protein                                                         | 126.095384 | -0.9332146 | 0.18910087 | -4.9350096 | 1.52E-05   |
| ID=gene:EBG00000313274                                                                    | 47.1612848 | -0.9417136 | 0.34312762 | -2.7444995 | 0.02572801 |
| ID=gene:EBG00000313276                                                                    | 47.1612848 | -0.9417136 | 0.34312762 | -2.7444995 | 0.02572801 |
| ID=gene:EBG00000313306                                                                    | 47.1612848 | -0.9417136 | 0.34312762 | -2.7444995 | 0.02572801 |
| ID=gene:EBG00000313308                                                                    | 47.1612848 | -0.9417136 | 0.34312762 | -2.7444995 | 0.02572801 |
| ID=gene:EBG00000313311                                                                    | 47.1612848 | -0.9417136 | 0.34312762 | -2.7444995 | 0.02572801 |
| Flagellar motor switch protein Flin                                                       | 278.499722 | -0.9437199 | 0.26011769 | -3.6280495 | 0.00220952 |
| Putative inner membrane protein YjeT (clustered with HfIC)                                | 68.2726868 | -0.9468962 | 0.23582941 | -4.0151746 | 0.00058296 |
| SSU ribosomal protein S8p (S15Ae)                                                         | 6952.40928 | -0.9480547 | 0.13047253 | -7.2663165 | 2.29E-11   |
| hypothetical protein                                                                      | 63.9334328 | -0.952447  | 0.25265714 | -3.7697212 | 0.00137731 |
| Inactive homolog of metal-dependent proteases%2Cputative molecular chaperone              | 300.01309  | -0.9556303 | 0.22268842 | -4.2913339 | 0.00020916 |
| SSU ribosomal protein S18p @ SSU ribosomal protein S18p%2C zinc-independent               | 4196.40735 | -0.9612083 | 0.13159303 | -7.3044011 | 1.78E-11   |
| hypothetical protein                                                                      | 59.0841954 | -0.9743514 | 0.28360338 | -3.4356128 | 0.00400085 |
| Putative secretion permease                                                               | 676.7642   | -0.9769247 | 0.16378944 | -5.9645157 | 8.18E-08   |
| Flagellar motor switch protein FlIM                                                       | 428.354608 | -0.9812725 | 0.21498114 | -4.5644585 | 6.88E-05   |
| FIG00638351: hypothetical protein                                                         | 231.834055 | -0.9976626 | 0.20842487 | -4.7866772 | 2.85E-05   |
| Peptide chain release factor 1                                                            | 1137.37889 | -1.002938  | 0.12674225 | -7.9132099 | 2.07E-13   |
| RNA polymerase sigma factor for flagellar operon                                          | 9275.76089 | -1.0049511 | 0.18800155 | -5.3454402 | 2.22E-06   |
| Flagellar biosynthesis protein FltQ                                                       | 203.143854 | -1.0126807 | 0.24820536 | -4.0800112 | 0.00045781 |
| FIG00641578: hypothetical protein                                                         | 1095.18172 | -1.0130774 | 0.37209515 | -2.7226299 | 0.02733957 |
| Hybrid sensory histidine kinase in two-component regulatory system with EvgA              | 1416.36106 | -1.0179169 | 0.1769862  | -5.7513914 | 2.66E-07   |
| LSU ribosomal protein L24p (L26e)                                                         | 9238.05816 | -1.0189529 | 0.12174709 | -8.3694228 | 5.97E-15   |
| Flagellar biosynthesis protein Flil                                                       | 229.678194 | -1.0277344 | 0.29473935 | -3.4889262 | 0.00342402 |
| LSU ribosomal protein L14p (L23e)                                                         | 7100.06713 | -1.0300291 | 0.15446356 | -6.668428  | 1.27E-09   |
| Putative transcriptional regulator LYSR-type                                              | 66.8604371 | -1.0375367 | 0.27843297 | -3.726343  | 0.00160489 |
| Mobile element protein                                                                    | 198.095139 | -1.0405555 | 0.21742207 | -4.7858778 | 2.85E-05   |
| Flagellar basal-body rod modification protein FlgD                                        | 1456.38122 | -1.0413767 | 0.27580738 | -3.7757389 | 0.00135455 |
| Ornithine carbamoyltransferase                                                            | 104.83429  | -1.0434434 | 0.3300103  | -3.1618511 | 0.00892433 |
| ID=gene:EBG00000313297                                                                    | 43.3192899 | -1.0462181 | 0.31199637 | -3.3533021 | 0.00517223 |
| Putative fimbrial-like protein                                                            | 31.9381756 | -1.048183  | 0.40718722 | -2.5742041 | 0.0387031  |
| Flagellar protein FlgJ [peptidoglycan hydrolase]                                          | 516.178169 | -1.0566755 | 0.25882621 | -4.0825675 | 0.00045382 |
| Flagellar basal-body P-ring formation protein FlgA                                        | 418.213254 | -1.0585113 | 0.26786432 | -3.9516696 | 0.00073155 |
| LSU ribosomal protein L4p (L1e)                                                           | 14053.1302 | -1.0732312 | 0.1689898  | -6.3508641 | 9.16E-09   |
| Flagellar hook protein FlgE                                                               | 3234.93459 | -1.0804059 | 0.25543247 | -4.2297125 | 0.00026195 |
| LSU ribosomal protein L3p (L3e)                                                           | 16017.8849 | -1.0846584 | 0.14998406 | -7.2318244 | 2.92E-11   |
| Flagellar basal-body rod protein FlgG                                                     | 1152.20791 | -1.0891292 | 0.26894727 | -4.049601  | 0.00051237 |
| Flagellar motor switch protein Flig                                                       | 657.294734 | -1.0962131 | 0.23458924 | -4.6729046 | 4.53E-05   |
| Fumarate hydratase class II%2C anaerobic                                                  | 274.383422 | -1.0971524 | 0.19619368 | -5.5921904 | 6.20E-07   |
| FIG00637865: hypothetical protein                                                         | 768.794502 | -1.1018401 | 0.20264882 | -5.4371899 | 1.38E-06   |
| hypothetical protein                                                                      | 77.7115028 | -1.1064554 | 0.25694541 | -4.3061887 | 0.00019714 |
| FIG139552: Putative protease                                                              | 59.5981328 | -1.1096529 | 0.26558931 | -4.1780783 | 0.00032352 |
| Putative exported protein                                                                 | 89.0434493 | -1.1162708 | 0.28553523 | -3.9093977 | 0.0008458  |

|                                                                                                          |            |            |            |            |            |
|----------------------------------------------------------------------------------------------------------|------------|------------|------------|------------|------------|
| ID=gene:EBG00000313300                                                                                   | 34.2567863 | -1.1232303 | 0.33954968 | -3.308     | 0.00590078 |
| LSU ribosomal protein L31p @ LSU ribosomal protein L31p%2C zinc-dependent                                | 1228.26454 | -1.1365431 | 0.18736387 | -6.065967  | 4.65E-08   |
| Di/tripeptide permease DtpA                                                                              | 3846.66891 | -1.1380404 | 0.14539726 | -7.8271106 | 3.97E-13   |
| Outer membrane protein W precursor                                                                       | 424.516582 | -1.1433658 | 0.25466427 | -4.4896986 | 9.35E-05   |
| Flagellar protein FljI                                                                                   | 87.6135071 | -1.1467892 | 0.34701984 | -3.3046791 | 0.00595464 |
| Putrescine importer                                                                                      | 761.255253 | -1.1467994 | 0.24843347 | -4.6161226 | 5.72E-05   |
| ATP-dependent RNA helicase RhlE                                                                          | 1374.56084 | -1.1475905 | 0.14931738 | -7.685579  | 1.15E-12   |
| Hydrogenase-2 operon protein hybA precursor                                                              | 212.171858 | -1.15025   | 0.1631008  | -7.0523875 | 9.84E-11   |
| FIG139928: Putative protease                                                                             | 71.9385186 | -1.1507496 | 0.25251971 | -4.5570682 | 7.08E-05   |
| DNA-binding protein Fis                                                                                  | 659.728129 | -1.1530279 | 0.18739192 | -6.1530291 | 2.83E-08   |
| Flagellar basal-body rod protein FlgF                                                                    | 1045.642   | -1.1597956 | 0.27518272 | -4.2146381 | 0.00027734 |
| Periplasmic binding protein                                                                              | 386.489621 | -1.1712581 | 0.1537669  | -7.6171015 | 1.93E-12   |
| SSU ribosomal protein S21p                                                                               | 406.609056 | -1.1792313 | 0.24339363 | -4.8449554 | 2.23E-05   |
| Arginine deiminase                                                                                       | 98.0274479 | -1.1877162 | 0.27126695 | -4.3784035 | 0.00015057 |
| Flagellar P-ring protein FlgI                                                                            | 744.596026 | -1.1877786 | 0.24116135 | -4.9252445 | 1.59E-05   |
| Flagellum-specific ATP synthase Flil                                                                     | 534.243086 | -1.1911626 | 0.28613463 | -4.1629448 | 0.00034241 |
| Flagellar basal-body rod protein FlgC                                                                    | 712.104017 | -1.1963352 | 0.37458417 | -3.1937687 | 0.00813159 |
| ID=gene:EBG00000313288                                                                                   | 64.0815478 | -1.2054349 | 0.38538032 | -3.1279099 | 0.00977025 |
| Molybdenum transport system protein ModD                                                                 | 176.300695 | -1.2099629 | 0.21482376 | -5.6323515 | 5.01E-07   |
| Flagellar protein FlhE                                                                                   | 130.129162 | -1.2133162 | 0.23314493 | -5.2041284 | 4.56E-06   |
| Flagellar basal-body rod protein FlgB                                                                    | 481.631213 | -1.228433  | 0.28359146 | -4.3316994 | 0.0001789  |
| Flagellar L-ring protein FlgH                                                                            | 485.48977  | -1.2357403 | 0.29046689 | -4.2543241 | 0.00023901 |
| Cold-shock DEAD-box protein A                                                                            | 22647.6572 | -1.2368604 | 0.10746188 | -11.50976  | 2.54E-28   |
| Flagellar assembly protein FlhH                                                                          | 303.562829 | -1.2390429 | 0.26808076 | -4.6219017 | 5.60E-05   |
| LSU ribosomal protein L11p (L12e)                                                                        | 4015.01682 | -1.2497356 | 0.16725303 | -7.4721253 | 5.50E-12   |
| Uptake hydrogenase small subunit precursor                                                               | 587.458305 | -1.2527273 | 0.13494505 | -9.2832402 | 2.01E-18   |
| FIG00638267: hypothetical protein                                                                        | 42.5372276 | -1.2586241 | 0.29721126 | -4.2347792 | 0.00025887 |
| 4'-phosphopantetheinyl transferase                                                                       | 1161.89135 | -1.2586377 | 0.16279821 | -7.7312752 | 8.18E-13   |
| Diaminopimelate decarboxylase                                                                            | 6472.01914 | -1.2673289 | 0.26075653 | -4.8602002 | 2.10E-05   |
| Flagellar biosynthesis protein FljP                                                                      | 88.3318728 | -1.2794513 | 0.24977935 | -5.122326  | 6.61E-06   |
| SSU ribosomal protein S20p                                                                               | 1230.55228 | -1.2880937 | 0.20449539 | -6.298889  | 1.21E-08   |
| NchD protein                                                                                             | 525.726398 | -1.2926724 | 0.1754473  | -7.3678674 | 1.17E-11   |
| SSU ribosomal protein S10p (S20e)                                                                        | 6299.56762 | -1.298552  | 0.16088602 | -8.0712546 | 6.19E-14   |
| Protein-N(5)-glutamine methyltransferase PrmC%2Cmethylates polypeptide chain release factors RF1 and RF2 | 527.212162 | -1.3096719 | 0.14574549 | -8.9860196 | 3.06E-17   |
| Putative exported protein                                                                                | 988.445577 | -1.317259  | 0.42000411 | -3.1363003 | 0.00958887 |
| FIG002082: Protein SirB2                                                                                 | 122.610051 | -1.3185397 | 0.23755097 | -5.5505547 | 7.64E-07   |
| Hypothetical MFS-type transporter protein YcaD                                                           | 1178.62952 | -1.3403891 | 0.37041616 | -3.6186032 | 0.00228625 |
| Hemin ABC transporter%2C permease protein                                                                | 142.024875 | -1.3538261 | 0.2143956  | -6.3146169 | 1.13E-08   |
| Membrane protein with DUF350 domain                                                                      | 21.5135249 | -1.3589607 | 0.37733942 | -3.6014279 | 0.00241159 |
| Flagellar M-ring protein FljI                                                                            | 458.724116 | -1.3603312 | 0.2786814  | -4.8813132 | 1.93E-05   |
| ID=gene:EBG00000313299                                                                                   | 53.1112194 | -1.3901312 | 0.37562037 | -3.7008939 | 0.00172711 |
| Putative outer membrane protein                                                                          | 268.136693 | -1.4216495 | 0.23463969 | -6.0588618 | 4.75E-08   |
| C4-dicarboxylate transporter DcuB                                                                        | 170.574644 | -1.4331912 | 0.23439288 | -6.1144829 | 3.54E-08   |
| ID=gene:EBG00000313298                                                                                   | 43.2066235 | -1.4820631 | 0.30299965 | -4.891303  | 1.85E-05   |
| Cobalt-zinc-cadmium resistance protein CzcA%3B Cation efflux system protein CusA                         | 973.233768 | -1.4825367 | 0.36304077 | -4.0836644 | 0.0004527  |
| Orf2                                                                                                     | 204.742121 | -1.5093893 | 0.23435949 | -6.4404874 | 5.29E-09   |
| ABC-type hemin transport system%2C ATPase component                                                      | 161.937159 | -1.5186477 | 0.1914517  | -7.9322757 | 1.81E-13   |
| ID=gene:EBG00000313230                                                                                   | 15.764247  | -1.561168  | 0.49899132 | -3.1286477 | 0.0097577  |
| Cold shock protein CspA                                                                                  | 14785.1522 | -1.5884546 | 0.17937344 | -8.8555734 | 9.68E-17   |
| hypothetical protein                                                                                     | 44.467851  | -1.5890812 | 0.27591017 | -5.7594152 | 2.55E-07   |
| ID=gene:EBG00000313231                                                                                   | 31.5216564 | -1.6174331 | 0.45933209 | -3.5212718 | 0.00311563 |
| hypothetical protein                                                                                     | 33.1084095 | -1.6177744 | 0.34573522 | -4.6792294 | 4.43E-05   |
| Inositol-1-monophosphatase                                                                               | 1023.44228 | -1.6456319 | 0.26529372 | -6.2030563 | 2.15E-08   |
| FIG00637915: hypothetical protein                                                                        | 107.221215 | -1.6587678 | 0.32634116 | -5.0829254 | 7.84E-06   |
| hypothetical protein                                                                                     | 249.155953 | -1.6707535 | 0.6009494  | -2.7801901 | 0.0236164  |
| Ferrichrome-iron receptor                                                                                | 1823.59572 | -1.7110682 | 0.16778739 | -10.197836 | 3.28E-22   |
| Carbamate kinase                                                                                         | 57.0106501 | -1.7301014 | 0.33421484 | -5.1766147 | 5.10E-06   |
| Lead%2C cadmium%2C zinc and mercury transporting ATPase                                                  | 2026.16705 | -1.7735686 | 0.17297129 | -10.253543 | 1.92E-22   |
| Pyruvate formate-lyase                                                                                   | 43339.8671 | -1.7868553 | 0.2519247  | -7.0928148 | 7.54E-11   |
| ID=gene:EBG00000313307                                                                                   | 25.4326063 | -1.8946258 | 0.56371717 | -3.3609511 | 0.00507051 |
| ID=gene:EBG00000313312                                                                                   | 25.4326063 | -1.8946258 | 0.56371717 | -3.3609511 | 0.00507051 |
| ID=gene:EBG00000313225                                                                                   | 33.9133917 | -2.1102381 | 0.48694555 | -4.3336223 | 0.00017781 |
| FIG00638707: hypothetical protein                                                                        | 86.0994746 | -2.5729017 | 0.3141226  | -8.1907564 | 2.45E-14   |
| Cobalt/zinc/cadmium efflux RND transporter%2Cmembrane fusion protein%2C CzcB family                      | 607.183489 | -3.1720634 | 0.7745105  | -4.0955718 | 0.00043593 |
| Cation efflux system protein CusC precursor                                                              | 238.119615 | -3.7191147 | 0.92758112 | -4.0094765 | 0.00059463 |
| ID=gene:EBG00000313254                                                                                   | 55.1263514 | -4.157494  | 1.46105968 | -2.8455333 | 0.01994811 |
| Cation efflux system protein CusF precursor                                                              | 112.910026 | -4.589993  | 1.01386839 | -4.5272079 | 7.94E-05   |
| ID=gene:EBG00000313296                                                                                   | 506.024089 | -4.6713897 | 0.95792248 | -4.8765843 | 1.97E-05   |
